# Supplementary material for: Visible-light-induced selective defluoroalkylations of polyfluoroarenes with alcohols
Source: PubMed Central journal article supplement — Chem Sci. 2022 Dec 21;14(4):916–22. doi: 10.1039/d2sc06290a (PMC9890929; doi:10.1039/d2sc06290a), 2022-12-21

## Supplementary Information

### Visible-Light-Induced Selective Defluoroalkylations of Polyfluoroarenes with

#### Alcohols

Wengang Xu,<sup>1\*</sup> Qi Shao,<sup>2</sup> Congjian Xia,<sup>2</sup> Qiao Zhang,<sup>1</sup> Yadi Xu,<sup>1</sup> Yingguo Liu,<sup>3\*</sup>

Mingbo Wu<sup>1,2\*</sup>

#### Affiliations:

<sup>1</sup>College of New Energy, China University of Petroleum (China East), 266580,  
Qingdao, P. R. China

<sup>2</sup>College of Chemistry and Chemical Engineering, State Key Laboratory of Heavy Oil  
Processing, China University of Petroleum (China East) 266580, Qingdao, P. R.  
China.

<sup>3</sup>Division of Molecular Catalysis and Synthesis, Henan Institute of Advanced  
Technology, Zhengzhou University, Zhengzhou Henan province, 450001, P. R. China

\*Corresponding author. Email: [chmxw@upc.edu.cn](mailto:chmxw@upc.edu.cn); [liuyg@zzu.edu.cn](mailto:liuyg@zzu.edu.cn);  
[wumb@upc.edu.cn](mailto:wumb@upc.edu.cn).

## Contents

|                                                                                   |     |
|-----------------------------------------------------------------------------------|-----|
| 1. General Information.....                                                       | S3  |
| 2. Complementary Reaction Optimization Data.....                                  | S4  |
| 3. Starting Material Preparation.....                                             | S7  |
| 4. General Procedures for Defluoroalkylation of Polyfluoroarenes .....            | S11 |
| 5. Analytical Data of the Products .....                                          | S12 |
| 6. Gram-Scale Preparation of <b>3aa</b> and Transformations of the Products ..... | S38 |
| 7. Additional Experiments to Elucidate the Mechanism.....                         | S42 |
| 8. DFT Calculation.....                                                           | S50 |
| References.....                                                                   | S69 |
| <sup>1</sup> H, <sup>19</sup> F, <sup>13</sup> C-NMR Spectra.....                 | S70 |

---

## 1. General Information

Chemicals and solvents were purchased from commercial suppliers and used as received.  $^1\text{H}$  NMR,  $^{13}\text{C}$  NMR,  $^{19}\text{F}$  NMR spectra were recorded on a Bruker AV-III400 (400 MHz) spectrometer. Chemical shifts were calibrated using residual undeuterated solvent as an internal reference ( $\text{CDCl}_3$ : 7.26 ppm  $^1\text{H}$  NMR, 77.0 ppm  $^{13}\text{C}$  NMR;  $\text{CD}_3\text{OD}$ : 4.87 ppm  $^1\text{H}$  NMR, 49.0 ppm  $^{13}\text{C}$  NMR). Multiplicity was indicated as follows: s (singlet), d (doublet), t (triplet), q (quartet), m (multiplet), dd (doublet of doublet), p (pentet). High-resolution mass spectra (HRMS) were obtained on Agilent 7200 GC-QTOF spectrometer (EI). Cyclic voltammetry was performed using Vertex. C. EIS Chenhua (China). The high-pressure syringe pump was purchased from Longer (China) for continuous flow setup. The L-cube dual syringe high pressure constant flow pump was purchased from Ou Shi Sheng (Beijing) Technology Co., Ltd (China). The needle valves, and PFA micro tubings were purchased from IDEX Health & Science (USA). The back pressure regulator was purchased from Zaiput (USA). Stern-Volmer fluorescence quenching was performed using an Spectrofluorophotometer RF-6000 Shimadzu Corporation.

## 2. Complementary Reaction Optimization Data

**Table S1.** Screening of photocatalysts

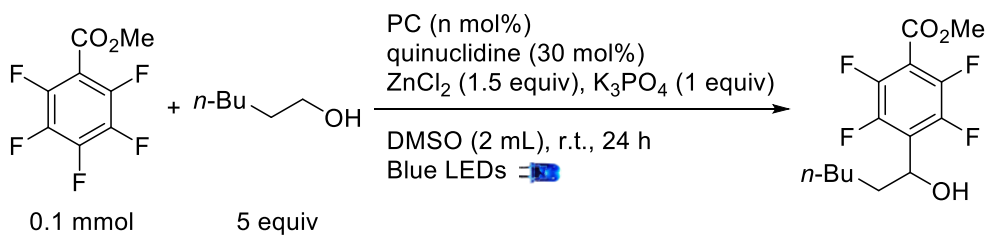

| entry | PC                                                                         | yield% <sup>a</sup> |
|-------|----------------------------------------------------------------------------|---------------------|
| 1     | 4-CzIPN (3 mol%)                                                           | 83                  |
| 2     | Ir(ppy) <sub>3</sub> (2 mol%)                                              | 0                   |
| 3     | Ir(ppy) <sub>2</sub> (dtbbpy)PF <sub>6</sub> (1 mol%)                      | 6                   |
| 4     | [Ir(dF(CF <sub>3</sub> )ppy) <sub>2</sub> (dtbbpy)PF <sub>6</sub> (1 mol%) | 70                  |

<sup>a</sup> The yields were obtained with <sup>1</sup>H-NMR using trimethoxybenzene as the internal standard.

**Table S2.** Screening of the amount of hexanol

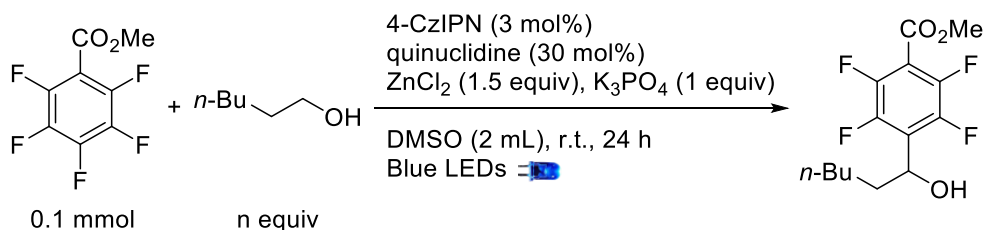

| entry | n   | yield% <sup>a</sup> |
|-------|-----|---------------------|
| 1     | 5   | 83                  |
| 2     | 3.5 | 85                  |
| 3     | 2.5 | 89                  |
| 4     | 1.5 | 87                  |

<sup>a</sup> The yields were obtained with <sup>19</sup>F-NMR using trifluorotoluene as the internal standard.

**Table S3.** Screening of the amount of quinuclidine

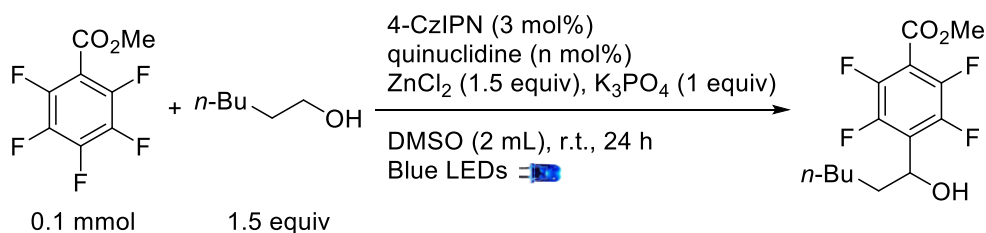

| entry | n  | yield% <sup>a</sup> |
|-------|----|---------------------|
| 1     | 30 | 87                  |
| 2     | 10 | 39                  |
| 3     | 5  | 24                  |

<sup>a</sup> The yields were obtained with <sup>19</sup>F-NMR using trifluorotoluene as the internal standard.

**Table S4.** Screening of solvents

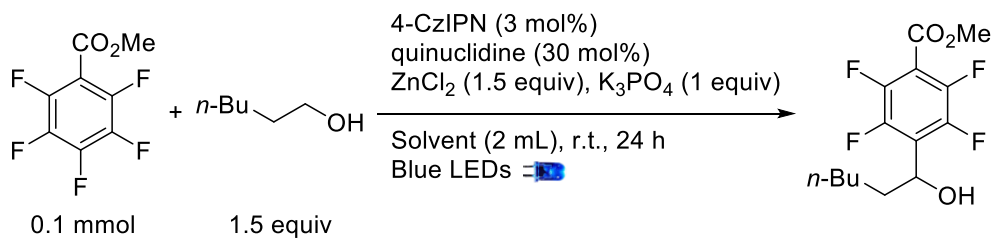

| entry | solvent | yield% <sup>a</sup> |
|-------|---------|---------------------|
| 1     | DMSO    | 87                  |
| 2     | DMF     | 0                   |
| 3     | DMA     | 0                   |
| 4     | MeCN    | 13                  |
| 5     | EA      | 0                   |
| 6     | MeTHF   | 8                   |

<sup>a</sup> The yields were obtained with <sup>19</sup>F-NMR using trifluorotoluene as the internal standard.

**Table S5.** Control experiments

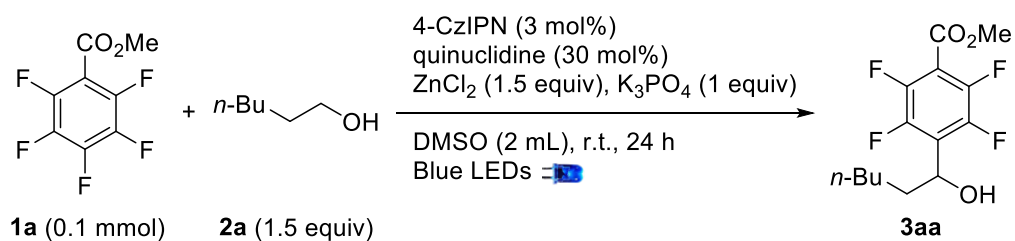

| entry | deviation                                                                | yield% ( <b>3aa</b> ) <sup>a</sup> |
|-------|--------------------------------------------------------------------------|------------------------------------|
| 1     | no                                                                       | 87 <sup>b</sup>                    |
| 2     | no light, 4-CzIPN, or quinuclidine                                       | 0                                  |
| 3     | w/o ZnCl <sub>2</sub>                                                    | 28                                 |
| 4     | w/o K <sub>3</sub> PO <sub>4</sub>                                       | 86                                 |
| 5     | w/o K <sub>3</sub> PO <sub>4</sub> and using ZnCl <sub>2</sub> (50 mol%) | 70                                 |

<sup>a</sup> The yields were obtained with <sup>19</sup>F-NMR using trifluorotoluene as the internal standard.

<sup>b</sup> Isolated yield.

**Table S6.** Optimization in continuous flow reactors

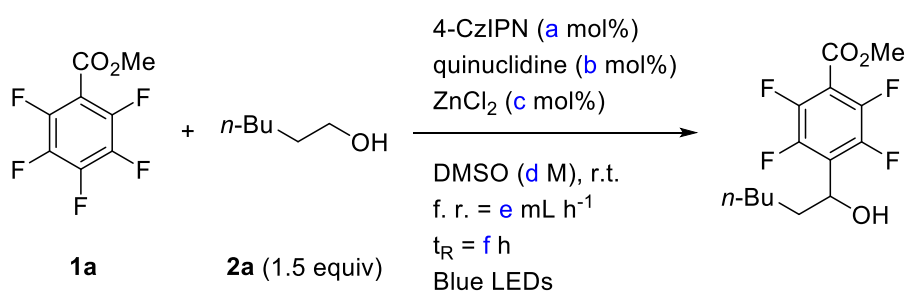

| entry | a | b  | c   | d    | e   | f   | conv.% <sup>a</sup> | yield% <sup>a</sup> |
|-------|---|----|-----|------|-----|-----|---------------------|---------------------|
| 1     | 2 | 30 | 150 | 0.05 | 2   | 0.5 | 80                  | 33                  |
| 2     | 2 | 30 | 150 | 0.05 | 1   | 1   | 98                  | 43                  |
| 3     | 2 | 20 | 50  | 0.05 | 1   | 1   | 81                  | 40                  |
| 4     | 1 | 20 | 50  | 0.05 | 1   | 1   | 74                  | 45                  |
| 5     | 1 | 20 | 50  | 0.05 | 1   | 2   | 82                  | 60                  |
| 6     | 1 | 20 | 50  | 0.05 | 0.5 | 2   | 83                  | 67                  |
| 7     | 1 | 20 | 50  | 0.1  | 0.5 | 2   | 81                  | 73                  |
| 8     | 1 | 20 | 50  | 0.1  | 0.5 | 8   | 86                  | 85 <sup>b</sup>     |

<sup>a</sup> The conversions and yields were obtained with <sup>19</sup>F-NMR using trifluorotoluene as the internal standard.

<sup>b</sup> Isolated yield.

### 3. Starting Material Preparation

#### 3.1 Preparation of 1k, 1l, 1m

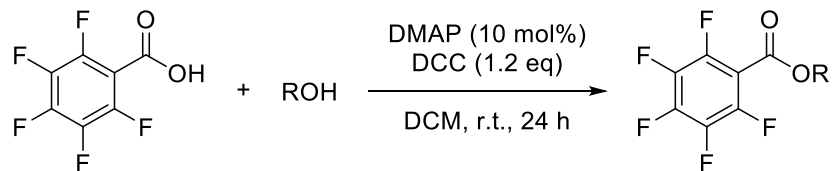

To a solution of pentafluorobenzoic acid (1.06 g, 5 mmol) in DCM (15 mL) was added DCC (1.24g, 6 mmol), DMAP (61.0 mg, 0.5 mmol), and alcohol (6 mmol). The mixture was stirred for 24 h at room temperature. After filtration, the mixture was concentrated under reduced pressure. The residue was purified by flash column chromatography on silica gel, eluting with petroleum ether/EtOAc = 9/1 (v/v) to afford the products as colorless oil.

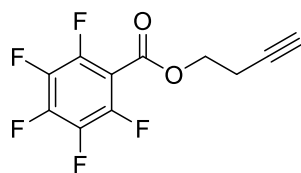

**But-3-yn-1-yl 2,3,4,5,6-pentafluorobenzoate (1k):** colorless oil (0.95 g, 72%).  $^1\text{H}$  NMR (400 MHz,  $\text{CDCl}_3$ ):  $\delta$  4.50 – 4.45 (m, 2H), 2.68 – 2.63 (m, 2H), 2.04 – 2.02 (m, 1H);  $^{19}\text{F}$  NMR (377 MHz,  $\text{CDCl}_3$ ):  $\delta$  -137.85 – -138.07 (m, 2F), -148.25 – -148.56 (m, 1F), -160.30 – -160.59 (m, 2F);  $^{13}\text{C}$  NMR (100 MHz,  $\text{CDCl}_3$ ):  $\delta$  158.73, 146.90 – 144.02 (m), 144.79 – 141.85 (m), 139.21 – 136.24 (m), 108.15 – 107.74 (m), 79.06, 70.33 (d,  $J = 1.8$  Hz), 64.21, 18.84; HRMS (EI): Calcd for  $\text{C}_{11}\text{H}_6\text{F}_5\text{O}_2$   $[\text{M}+\text{H}]^+$  264.1510, found 264.1512.

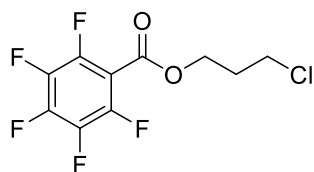

**3-Chloropropyl 2,3,4,5,6-pentafluorobenzoate (1l):** colorless oil (0.82 g, 57%).  $^1\text{H}$  NMR (400 MHz,  $\text{CDCl}_3$ ):  $\delta$  4.54 (t,  $J = 6.0$  Hz, 2H), 3.68 (t,  $J = 6.3$  Hz, 2H), 2.22 (p,  $J = 6.2$  Hz, 2H);  $^{19}\text{F}$  NMR (377 MHz,  $\text{CDCl}_3$ ):  $\delta$  -138.07 – -138.20 (m, 2F), -148.10 –

-148.26 (m, 1F), -160.15 – -160.32 (m, 2F); <sup>13</sup>C NMR (100 MHz, CDCl<sub>3</sub>): δ 158.82 (d, *J* = 1.4 Hz), 146.91 – 144.04 (m), 144.78 – 141.83 (m), 139.22 – 136.24 (m), 108.17 – 107.78 (m), 63.34, 40.69, 31.28; HRMS (EI): Calcd for C<sub>10</sub>H<sub>7</sub>ClF<sub>5</sub>O<sub>2</sub> [M+H]<sup>+</sup> 289.5980, found 289.5984.

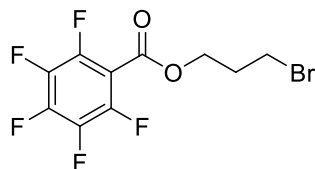

**3-Bromopropyl 2,3,4,5,6-pentafluorobenzoate (1m):** colorless oil (1.09 g, 65%). <sup>1</sup>H NMR (400 MHz, CDCl<sub>3</sub>): δ 4.52 (t, *J* = 5.9 Hz, 2H), 3.51 (t, *J* = 6.4 Hz, 2H), 2.29 (p, *J* = 6.2 Hz, 2H); <sup>19</sup>F NMR (377 MHz, CDCl<sub>3</sub>): δ -138.15 – -138.26 (m, 2F), -148.26 – -148.40 (m, 1F), -160.29 – -160.47 (m, 2F); <sup>13</sup>C NMR (100 MHz, CDCl<sub>3</sub>): δ 158.78, 146.90 – 144.02 (m), 144.77 – 141.83 (m), 139.19 – 136.25 (m), 108.14 – 107.74 (m), 64.33, 31.32, 28.72; HRMS (EI): Calcd for C<sub>10</sub>H<sub>7</sub>BrF<sub>5</sub>O<sub>2</sub> [M+H]<sup>+</sup> 334.0520, found 334.0525.

### 3.2 Preparation of 1w

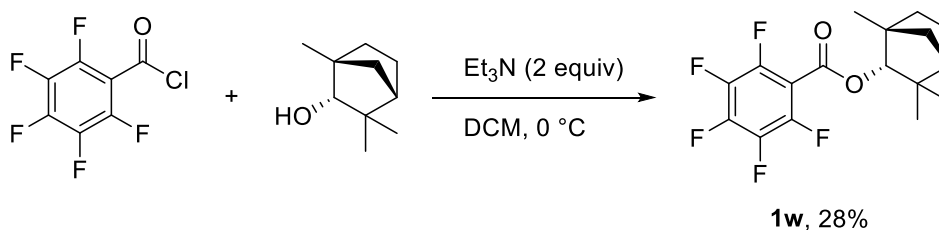

To a 50 mL round-bottom flask charged with (+)-Fenchol (0.77 g, 5.0 mmol) was added Et<sub>3</sub>N (1.01 g, 10 mmol) and DCM (10 mL). The resulting mixture was stirred at 0 °C in an ice-water bath for 5 min. Then, pentafluorobenzoyl chloride (1.15 g, 5.0 mmol) was added dropwise. After stirring at 0 °C for 6 hours, the reaction mixture was filtered through celite, and the filtrate was concentrated under vacuum. The residue was purified by flash column chromatography on silica gel, eluting with petroleum ether/EtOAc = 9/1 (v/v) to afford 0.49 g (28%) of **1w** as a colorless oil.

**(1R,2R,4S)-1,3,3-trimethylbicyclo[2.2.1]heptan-2-yl 2,3,4,5,6-pentafluorobenzoate (1w):** colorless oil (0.49 g, 28%). <sup>1</sup>H NMR (400 MHz, CDCl<sub>3</sub>):



$\delta$  4.64 (d,  $J = 2.0$  Hz, 1H), 1.80 – 1.62 (m, 4H), 1.55 – 1.45 (m, 1H), 1.26 (dd,  $J = 10.4$ , 1.6 Hz, 1H), 1.19 (s, 3H), 1.16 (dt,  $J = 12.3$ , 2.4 Hz, 1H), 1.12 (s, 3H), 0.87 (s, 3H);  $^{19}\text{F}$  NMR (377 MHz,  $\text{CDCl}_3$ ):  $\delta$  -138.24 – -138.40 (m, 2F), -149.25 – -149.46 (m, 1F), -160.49 – -160.72 (m, 2F);  $^{13}\text{C}$  NMR (100 MHz,  $\text{CDCl}_3$ ):  $\delta$  159.45 (d,  $J = 1.2$  Hz), 146.80 – 143.91 (m), 144.52 – 141.58 (m), 139.20 – 136.26 (m), 108.86 – 108.48 (m), 89.87, 48.48, 48.38, 41.36, 39.63, 29.64, 26.64, 25.71, 20.13, 19.18; HRMS (EI): Calcd for  $\text{C}_{17}\text{H}_{18}\text{F}_5\text{O}_2$   $[\text{M}+\text{H}]^+$  349.3130, found 349.3134.

### 3.3 Preparation of S1, S2, S3

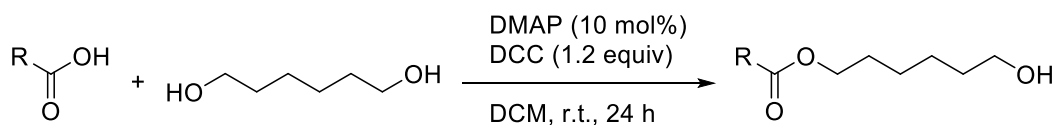

To a solution of acid (5 mmol) in DCM (15 mL) was added DCC (1.24g, 6 mmol), DMAP (61.0 mg, 0.5 mmol), and 1,6-hexanediol (0.71 g, 6 mmol). The mixture was stirred for 24 h at room temperature. After filtration, the mixture was concentrated under reduced pressure. The residue was purified by flash column chromatography on silica gel, eluting with petroleum ether/EtOAc = 2/1 (v/v) to afford compound as a colorless oil.

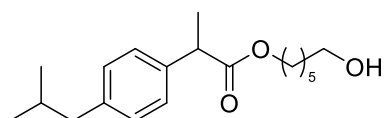

**6-Hydroxyhexyl 2-(4-isobutylphenyl)propanoate (S1):** colorless oil (0.63 g, 41%).  $^1\text{H}$  NMR (400 MHz,  $\text{CDCl}_3$ ):  $\delta$  7.19 (d,  $J = 8.1$  Hz, 2H), 7.08 (d,  $J = 8.1$  Hz, 2H), 4.06 (td,  $J = 7.6$ , 6.7, 1.1 Hz, 2H), 3.68 (q,  $J = 7.2$  Hz, 1H), 3.60 (t,  $J = 6.5$  Hz, 2H), 2.44 (d,  $J = 7.2$  Hz, 2H), 1.89 – 1.79 (m, 1H), 1.62 – 1.50 (m, 5H), 1.48 (d,  $J = 7.2$  Hz, 3H), 1.36 – 1.23 (m, 4H), 0.89 (d,  $J = 6.6$  Hz, 6H);  $^{13}\text{C}$  NMR (100 MHz,  $\text{CDCl}_3$ ):  $\delta$  174.84, 140.45, 137.85, 129.24, 127.13, 64.55, 62.77, 45.18, 45.00, 32.53, 30.16, 28.47, 25.52, 25.22, 22.35, 18.42; HRMS (EI): Calcd for  $\text{C}_{19}\text{H}_{31}\text{O}_3$   $[\text{M}+\text{H}]^+$  307.4460, found 307.4457.

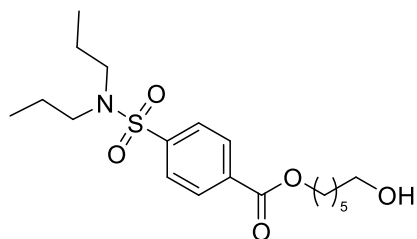

**6-Hydroxyhexyl 4-(N,N-dipropylsulfamoyl)benzoate (S2):** colorless oil (0.39 g, 20%). <sup>1</sup>H NMR (400 MHz, CDCl<sub>3</sub>): δ 8.14 (d, *J* = 8.5 Hz, 2H), 7.86 (d, *J* = 8.5 Hz, 2H), 4.35 (t, *J* = 6.6 Hz, 2H), 3.65 (t, *J* = 6.5 Hz, 2H), 3.11 – 3.07 (m, 4H), 1.79 (p, *J* = 6.6 Hz, 2H), 1.66 (s, 1H), 1.64 – 1.42 (m, 10H), 0.86 (t, *J* = 7.4 Hz, 6H); <sup>13</sup>C NMR (100 MHz, CDCl<sub>3</sub>): δ 165.31, 144.22, 133.74, 130.14, 126.98, 65.59, 62.76, 49.93, 32.56, 28.63, 25.80, 25.40, 21.92, 11.12; HRMS (EI): Calcd for C<sub>19</sub>H<sub>32</sub>NO<sub>5</sub>S [M+H]<sup>+</sup> 386.5190, found 386.5187.

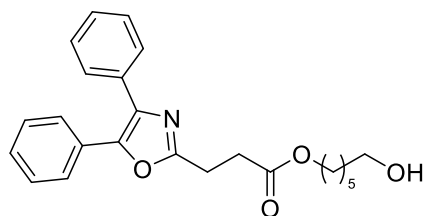

**6-Hydroxyhexyl 3-(4,5-diphenyloxazol-2-yl)propanoate (S3):** colorless oil (0.70 g, 36%). <sup>1</sup>H NMR (400 MHz, CDCl<sub>3</sub>): δ 7.63 (dd, *J* = 8.4, 1.7 Hz, 2H), 7.57 (dd, *J* = 8.1, 1.7 Hz, 2H), 7.39 – 7.29 (m, 6H), 4.13 (t, *J* = 6.7 Hz, 2H), 3.60 (t, *J* = 6.5 Hz, 2H), 3.18 (t, *J* = 7.5 Hz, 2H), 2.91 (t, *J* = 7.5 Hz, 2H), 1.68 – 1.49 (m, 5H), 1.36 (p, *J* = 3.5 Hz, 4H); <sup>13</sup>C NMR (100 MHz, CDCl<sub>3</sub>): δ 172.09, 161.79, 145.37, 135.06, 132.39, 128.92, 128.62, 128.53, 128.44, 128.05, 127.87, 126.42, 64.80, 62.77, 32.51, 31.15, 28.52, 25.66, 25.31, 23.55; HRMS (EI): Calcd for C<sub>24</sub>H<sub>28</sub>NO<sub>4</sub> [M+H]<sup>+</sup> 394.4830, found 394.4836.

## 4. General Procedures for Defluoroalkylation of Polyfluoroarenes

### 4.1 General Procedures in Batch

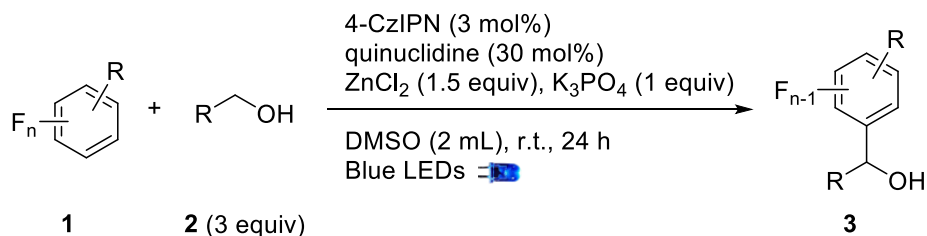

In a 10 mL Schlenk tube with a magnetic stir bar were placed 4-CzIPN (**PC**, 4.8 mg, 0.006 mmol), quinuclidine (6.6 mg, 0.06 mmol),  $\text{K}_3\text{PO}_4$  (42.4 mg, 0.2 mmol) and  $\text{ZnCl}_2$  (41.0 mg, 0.3 mmol). Under nitrogen atmosphere, fluoroarenes (**1**, 0.2 mmol), alcohols (**2**, 0.6 mmol), DMSO (4 mL) were added, subsequently. The mixture was degassed *via* freeze-pump-thaw for three times, and irradiated under a blue LED (2-meter strips, 18 W, 456 nm) for 24 hrs at rt. The resulting mixture was quenched with  $\text{H}_2\text{O}$  (2 mL) and extracted with  $\text{Et}_2\text{O}$  (5 mL  $\times$  3). The combined organic layer was washed with saturated brine, dried over  $\text{MgSO}_4$  and concentrated in vacuo. Silica gel chromatography (eluent: petroleum ether/ $\text{EtOAc}$  = 5/1) of the crude product afforded the desired compound.

### 4.2 General Procedures in Continuous-Flow

a) Reaction set up

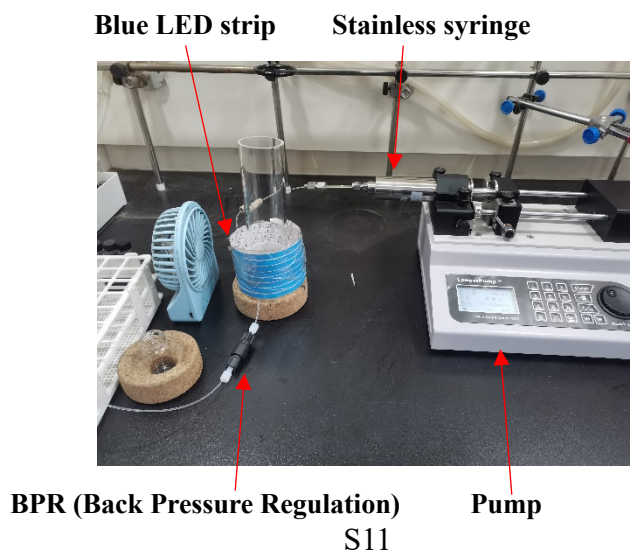

Figure S1. Continuous-flow setup

b) General procedures

Under nitrogen atmosphere, a round bottom flask was equipped with a rubber septum and magnetic stir bar and charged with 4-CzIPN (PC, 7.9 mg, 0.01 mmol), quinuclidine (22.2 mg, 0.2 mmol), ZnCl<sub>2</sub> (68.15 mg, 0.5 mmol), pentafluorobenzoate (**1a**, 226.1 mg, 1 mmol) and hexanol (**2a**, 153.3 mg, 1.5 mmol). The resulting mixture was sealed and degassed *via* vacuum evacuation and back-filled with nitrogen for three times. Then anhydrous DMSO (10 mL) was added, and bubbled with a nitrogen balloon for 10-15 min. As shown in Figure S1, a syringe pump was filled with the reaction mixture and attached to the flow apparatus with 5 psi back-pressure regulator (BPR). The tubing (PFA, O.D. = 1/16", I.D. 0.03", 877 cm, volume = 4.0 mL) was placed at rt. The flow apparatus itself was set up with  $t_R = 8$  h, flow rate = 0.5 mL/h. After approximately 9 h of equilibration, the reacted solution was collected for 4 h. The resulting mixture was quenched with H<sub>2</sub>O (2 mL) and extracted with Et<sub>2</sub>O (5 mL × 3). The combined organic layer was washed with saturated brine, dried over MgSO<sub>4</sub> and concentrated in vacuo. Silica gel chromatography (eluent: petroleum ether/EtOAc = 5/1) of the crude product afforded the desired compound.

5. Analytical Data of the Products

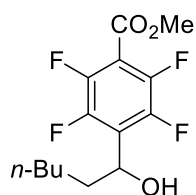

**Methyl 2,3,5,6-tetrafluoro-4-(1-hydroxyhexyl)benzoate (3aa):** The reaction was performed using 0.2 mmol of fluoroarenes and 0.3 mmol of alcohols; colorless oil (54 mg, 87%). <sup>1</sup>H NMR (400 MHz, CDCl<sub>3</sub>): δ 5.07 (q, *J* = 7.5 Hz, 1H), 3.97 (s, 3H), 2.33 (d, *J* = 8.1 Hz, 1H), 2.05 – 1.96 (m, 1H), 1.89 – 1.77 (m, 1H), 1.49 – 1.41 (m, 1H), 1.33 – 1.30 (m, 5H), 0.88 (t, *J* = 8.0 Hz, 3H); <sup>19</sup>F NMR (377 MHz, CDCl<sub>3</sub>): δ -139.34 – -139.50 (m, 2F), -143.18 – -143.40 (m, 2F); <sup>13</sup>C NMR (100 MHz, CDCl<sub>3</sub>): δ 160.09 – 160.19 (m), 145.97 – 143.18 (m), 145.67 – 142.99 (m), 125.70 (t, *J* = 14.9 Hz), 111.38 (t, *J* = 16.0 Hz), 66.81, 53.30, 36.78, 31.30, 25.35, 22.44, 13.92; HRMS (EI): Calcd for

C<sub>14</sub>H<sub>17</sub>O<sub>3</sub>F<sub>4</sub> [M+H]<sup>+</sup> 309.1114, found 309.1109.

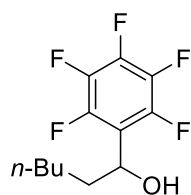

**1-(Perfluorophenyl)hexan-1-ol (3ba):** The reaction was performed using 0.2 mmol of fluoroarenes and 1 mmol of alcohols; white solid (49 mg, 91%); Mp. 48 – 49 °C. <sup>1</sup>H NMR (400 MHz, CDCl<sub>3</sub>): δ 5.03 (t, *J* = 7.3 Hz, 1H), 2.23 (s, 1H), 2.05 – 1.95 (m, 1H), 1.86 – 1.77 (m, 1H), 1.50 – 1.39 (m, 1H), 1.35 – 1.27 (m, 5H), 0.88 (t, *J* = 6.8 Hz, 3H); <sup>19</sup>F NMR (377 MHz, CDCl<sub>3</sub>): δ -144.05 (dd, *J* = 22.4, 8.1 Hz, 2F), -155.51 (td, *J* = 20.7, 4.2 Hz, 1F), -161.94 (tt, *J* = 18.5, 5.0 Hz, 2F); <sup>13</sup>C NMR (100 MHz, CDCl<sub>3</sub>): δ 146.09 – 143.35 (m), 141.87 – 138.96 (m), 138.96 – 136.09 (m), 117.47 – 117.08 (m), 66.54 (q, *J* = 1.5 Hz), 36.97 (t, *J* = 1.8 Hz), 31.33, 25.49, 22.45, 13.90; HRMS (EI): Calcd for C<sub>12</sub>H<sub>14</sub>OF<sub>5</sub> [M+H]<sup>+</sup> 269.0965, found 269.0963.

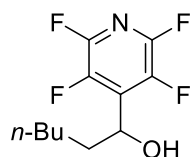

**1-(Perfluoropyridin-4-yl)hexan-1-ol (3ca):** The reaction was performed using 0.2 mmol of fluoroarenes and 1 mmol of alcohols; colorless oil (39 mg, 77%). <sup>1</sup>H NMR (400 MHz, CDCl<sub>3</sub>): δ 5.10 (t, *J* = 8.8 Hz, 1H), 2.31 (s, 1H), 2.06 – 1.96 (m, 1H), 1.89 – 1.76 (m, 1H), 1.54 – 1.41 (m, 1H), 1.37 – 1.27 (m, 5H), 0.89 (t, *J* = 6.8 Hz, 3H); <sup>19</sup>F NMR (377 MHz, CDCl<sub>3</sub>): δ -90.53 – -90.74 (m, 2F), -145.01 – -145.20 (m, 2F); <sup>13</sup>C NMR (100 MHz, CDCl<sub>3</sub>): δ 144.89 – 142.05 (m), 141.22 – 138.25 (m), 136.49 – 136.11 (m), 66.96, 36.53 (t, *J* = 1.4 Hz), 31.25, 25.19, 22.41, 13.91; HRMS (EI): Calcd for C<sub>11</sub>H<sub>13</sub>NOF<sub>4</sub>Na [M+Na]<sup>+</sup> 274.0831, found 274.0833.

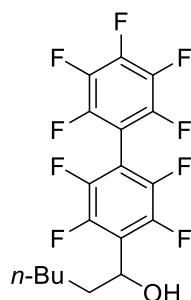

**1-(Perfluoro-[1,1'-biphenyl]-4-yl)hexan-1-ol (3da):** The reaction was performed using 0.2 mmol of fluoroarenes and 0.3 mmol of alcohols; white solid (47 mg, 57%); Mp. 59 – 60 °C. <sup>1</sup>H NMR (400 MHz, CDCl<sub>3</sub>): δ 5.14 (q, *J* = 8.1 Hz, 1H), 2.26 (d, *J* = 8.2 Hz, 1H), 2.11 – 2.02 (m, 1H), 1.94 – 1.85 (m, 1H), 1.57 – 1.46 (m, 1H), 1.37 – 1.31 (m, 5H), 0.90 (t, *J* = 6.9 Hz, 3H); <sup>19</sup>F NMR (377 MHz, CDCl<sub>3</sub>): δ -137.26 - -137.41 (m, 2F), -138.31 – -138.49 (m, 2F), -143.22 – -143.35 (m, 2F), -150.22 - -150.35 (m, 1F), -160.49 – -160.66 (m, 2F); <sup>13</sup>C NMR (100 MHz, CDCl<sub>3</sub>): δ 145.91 – 143.06 (m), 145.38 – 142.63 (m), 143.82 – 140.89 (m), 139.30 – 136.60 (m), 139.09 – 136.37 (m), 124.78 (t, *J* = 15.0 Hz), 105.36 – 104.75 (m), 102.59 – 102.05 (m), 66.96 (t, *J* = 1.8 Hz), 36.91 (t, *J* = 1.4 Hz), 31.35, 25.49, 22.47, 13.96; HRMS (EI): Calcd for C<sub>18</sub>H<sub>13</sub>OF<sub>9</sub>Na [M+Na]<sup>+</sup> 439.0720, found 439.0711.

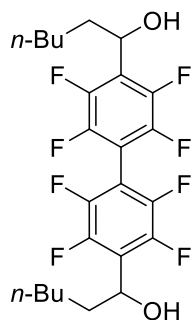

**1,1'-(Perfluoro-[1,1'-biphenyl]-4,4'-diyl)bis(hexan-1-ol) (3ea):** white solid (73 mg, 73%); Mp. 119 – 120 °C. <sup>1</sup>H NMR (400 MHz, CDCl<sub>3</sub>): δ 5.14 (q, *J* = 7.2 Hz, 1H), 2.26 (d, *J* = 7.9 Hz, 1H), 2.12 – 2.00 (m, 1H), 1.94 – 1.85 (m, 1H), 1.56 – 1.50 (m, 1H), 1.38 – 1.30 (m, 5H), 0.91 (t, *J* = 6.8 Hz, 3H); <sup>19</sup>F NMR (377 MHz, CDCl<sub>3</sub>): δ -138.26 – -138.41 (m, 4F), -143.50 – -143.66 (m, 4F); <sup>13</sup>C NMR (100 MHz, CDCl<sub>3</sub>): δ 145.86 – 143.01 (m), 145.43 – 142.56 (m), 124.46 (t, *J* = 15.0 Hz), 106.33 – 105.76 (m), 66.96, 36.92, 31.35, 25.49, 22.48, 13.97; HRMS (EI): Calcd for C<sub>24</sub>H<sub>27</sub>O<sub>2</sub>F<sub>8</sub> [M+H]<sup>+</sup> 499.1883, found 499.1891.

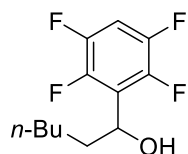

**1-(2,3,5,6-Tetrafluorophenyl)hexan-1-ol (3fa):** colorless oil (29 mg, 57%). <sup>1</sup>H NMR (400 MHz, CDCl<sub>3</sub>): δ 7.03 - 6.95 (m, 1H), 5.06 (q, *J* = 7.8 Hz, 1H), 2.18 (d, *J* = 8.6 Hz,

1H), 2.06 – 1.97 (m, 1H), 1.89 – 1.78 (m, 1H), 1.52 – 1.40 (m, 1H), 1.34 – 1.28 (m, 5H), 0.87 (t,  $J = 6.8$  Hz, 3H);  $^{19}\text{F}$  NMR (377 MHz,  $\text{CDCl}_3$ ):  $\delta$  -138.92 - -139.03 (m, 2F), -144.68 - -144.80 (m, 2F);  $^{13}\text{C}$  NMR (100 MHz,  $\text{CDCl}_3$ ):  $\delta$  147.32 – 144.18 (m), 145.87 – 142.74 (m), 123.12 (t,  $J = 14.7$  Hz), 104.93 (t,  $J = 22.6$  Hz), 66.92 (t,  $J = 1.9$  Hz), 37.00 (t,  $J = 1.7$  Hz), 31.35, 25.45, 22.47, 13.96; HRMS (EI): Calcd for  $\text{C}_{12}\text{H}_{15}\text{OF}_4$   $[\text{M}+\text{H}]^+$  251.1059, found 251.1064.

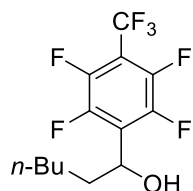

**1-(2,3,5,6-Tetrafluoro-4-(trifluoromethyl)phenyl)hexan-1-ol (3ga):** The reaction was performed using 0.2 mmol of fluoroarenes and 1 mmol of alcohols; white solid (50 mg, 78%); Mp. 51 – 52 °C.  $^1\text{H}$  NMR (400 MHz,  $\text{CDCl}_3$ ):  $\delta$  5.09 (t,  $J = 7.3$  Hz, 1H), 2.28 (s, 1H), 2.06 – 1.97 (m, 1H), 1.91 – 1.78 (m, 1H), 1.52 – 1.43 (m, 1H), 1.37 – 1.28 (m, 5H), 0.89 (t,  $J = 6.8$  Hz, 3H);  $^{19}\text{F}$  NMR (377 MHz,  $\text{CDCl}_3$ ):  $\delta$  -56.40 (t,  $J = 21.7$  Hz, 3F), -140.32 – -140.62 (m, 2F), -142.19 - -142.30 (m, 2F);  $^{13}\text{C}$  NMR (100 MHz,  $\text{CDCl}_3$ ):  $\delta$  145.99 – 143.19 (m), 145.46 – 142.55 (m), 126.84 (t,  $J = 15.0$  Hz), 120.71 (q,  $J = 274.6$  Hz), 108.74 (q,  $J = 11.3$  Hz), 66.81 (t,  $J = 1.8$  Hz), 36.74 (t,  $J = 1.5$  Hz), 31.29, 25.35, 22.44, 13.92; HRMS (EI): Calcd for  $\text{C}_{13}\text{H}_{14}\text{OF}_7$   $[\text{M}+\text{H}]^+$  319.0933, found 319.0926.

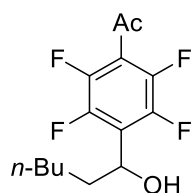

**1-(2,3,5,6-Tetrafluoro-4-(1-hydroxyhexyl)phenyl)ethan-1-one (3ha):** The reaction was performed using 0.2 mmol of fluoroarenes and 0.3 mmol of alcohols; colorless liquid (38 mg, 65%).  $^1\text{H}$  NMR (400 MHz,  $\text{CDCl}_3$ ):  $\delta$  5.07 (q,  $J = 7.1$  Hz, 1H), 2.62 (t,  $J = 1.8$  Hz, 3H), 2.24 (d,  $J = 7.8$  Hz, 1H), 2.06 – 1.96 (m, 1H), 1.89 – 1.76 (m, 1H), 1.50 – 1.42 (m, 1H), 1.37 – 1.28 (m, 5H), 0.89 (t,  $J = 6.8$  Hz, 3H);  $^{19}\text{F}$  NMR (377 MHz,  $\text{CDCl}_3$ ):  $\delta$  -141.67 – -141.79 (m, 2F), -143.07 – -143.19 (m, 2F);  $^{13}\text{C}$  NMR (100 MHz,  $\text{CDCl}_3$ ):  $\delta$  192.13 (t,  $J = 1.6$  Hz), 145.80 – 143.00 (m), 145.21 – 142.35 (m), 125.30 (t,

$J = 15.1$  Hz), 118.44 (t,  $J = 16.7$  Hz), 66.81 (t,  $J = 1.7$  Hz), 36.81 (t,  $J = 1.6$  Hz), 32.42 (t,  $J = 2.4$  Hz), 31.31, 25.37, 22.44, 13.93; HRMS (EI): Calcd for  $C_{14}H_{17}O_2F_4$   $[M+H]^+$  293.1165, found 293.1166.

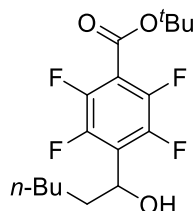

**Tert-butyl 2,3,5,6-tetrafluoro-4-(1-hydroxyhexyl)benzoate (3ia):** white solid (65 mg, 93%); Mp. 46 – 47 °C.  $^1H$  NMR (400 MHz,  $CDCl_3$ ):  $\delta$  5.06 (t,  $J = 7.2$  Hz, 1H), 2.24 (s, 1H), 1.49 – 1.40 (m, 1H), 1.35 – 1.28 (m, 5H), 0.88 (t,  $J = 6.8$  Hz, 3H);  $^{19}F$  NMR (377 MHz,  $CDCl_3$ ):  $\delta$  -140.95 – -141.06 (m, 2F), -143.66 – -143.82 (m, 2F);  $^{13}C$  NMR (100 MHz,  $CDCl_3$ ):  $\delta$  158.58 – 158.45 (m), 145.70 – 142.99 (m), 145.48 – 142.71 (m), 124.62 (t,  $J = 15.0$  Hz), 113.56 (t,  $J = 17.0$  Hz), 84.69, 66.84 (t,  $J = 1.9$  Hz), 36.91 (t,  $J = 1.4$  Hz), 31.34, 28.06, 25.37, 22.45, 13.94; HRMS (EI): Calcd for  $C_{17}H_{23}O_3F_4$   $[M+H]^+$  351.1583, found 351.1581.

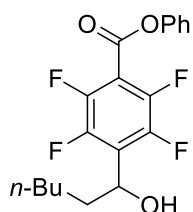

**Phenyl 2,3,5,6-tetrafluoro-4-(1-hydroxyhexyl)benzoate (3ja):** white solid (62 mg, 84%); Mp. 72 – 73 °C.  $^1H$  NMR (400 MHz,  $CDCl_3$ ):  $\delta$  7.48 – 7.42 (m, 2H), 7.34 – 7.29 (m, 1H), 7.27 – 7.23 (m, 2H), 5.12 (q,  $J = 7.7$  Hz, 1H), 2.25 (d,  $J = 8.4$  Hz, 1H), 2.08 – 1.99 (m, 1H), 1.91 – 1.82 (m, 1H), 1.53 – 1.42 (m, 1H), 1.39 – 1.28 (m, 5H), 0.90 (t,  $J = 6.8$  Hz, 3H);  $^{19}F$  NMR (377 MHz,  $CDCl_3$ ):  $\delta$  -138.46 – -138.58 (m, 2F), -142.80 – -142.93 (m, 2F);  $^{13}C$  NMR (100 MHz,  $CDCl_3$ ):  $\delta$  158.17 – 157.97 (m), 150.07, 146.29 – 143.42 (m), 145.88 – 143.11 (m), 129.68, 126.66, 126.38 (t,  $J = 15.0$  Hz), 121.31, 111.07 (t,  $J = 15.3$  Hz), 66.93 (t,  $J = 1.7$  Hz), 36.88 (t,  $J = 1.5$  Hz), 31.33, 25.38, 22.46, 13.94; HRMS (EI): Calcd for  $C_{19}H_{18}O_3F_4Na$   $[M+Na]^+$  393.1090, found 393.1095.



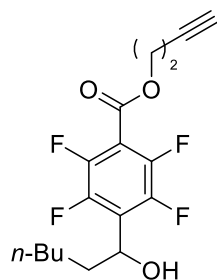

**But-3-yn-1-yl 2,3,5,6-tetrafluoro-4-(1-hydroxyhexyl)benzoate (3ka):** colorless oil (47 mg, 68%).  $^1\text{H}$  NMR (400 MHz,  $\text{CDCl}_3$ ):  $\delta$  5.07 (q,  $J = 7.6$  Hz, 1H), 4.49 (t,  $J = 6.8$  Hz, 2H), 2.67 (td,  $J = 6.8, 2.7$  Hz, 2H), 2.25 (d,  $J = 8.3$  Hz, 1H), 2.05 (t,  $J = 2.6$  Hz, 1H), 2.03 – 1.95 (m, 1H), 1.87 – 1.77 (m, 1H), 1.51 – 1.41 (m, 1H), 1.37 – 1.27 (m, 5H), 0.88 (t,  $J = 6.8$  Hz, 3H);  $^{19}\text{F}$  NMR (377 MHz,  $\text{CDCl}_3$ ):  $\delta$  -138.98 – -139.11 (m, 2F), -143.11 – -143.25 (m, 2F);  $^{13}\text{C}$  NMR (100 MHz,  $\text{CDCl}_3$ ):  $\delta$  159.44 – 159.28 (m), 146.30 – 143.19 (m), 145.76 – 142.92 (m), 125.84 (t,  $J = 15.1$  Hz), 111.26 (t,  $J = 15.6$  Hz), 79.18, 70.38, 66.86 (t,  $J = 1.8$  Hz), 64.04, 36.85 (t,  $J = 1.8$  Hz), 31.31, 25.36, 22.45, 18.86, 13.94; HRMS (EI): Calcd for  $\text{C}_{17}\text{H}_{19}\text{O}_3\text{F}_4$   $[\text{M}+\text{H}]^+$  347.1270, found 347.1272.

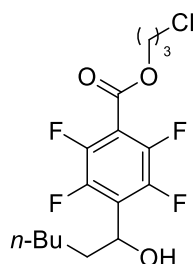

**3-Chloropropyl 2,3,5,6-tetrafluoro-4-(1-hydroxyhexyl)benzoate (3la):** colorless oil (62 mg, 84%).  $^1\text{H}$  NMR (400 MHz,  $\text{CDCl}_3$ ):  $\delta$  5.08 (q,  $J = 7.5$  Hz, 1H), 4.55 (t,  $J = 5.9$  Hz, 2H), 3.69 (t,  $J = 6.3$  Hz, 2H), 2.26 – 2.18 (m, 3H), 2.06 – 1.96 (m, 1H), 1.88 – 1.76 (m, 1H), 1.52 – 1.40 (m, 1H), 1.36 – 1.29 (m, 5H), 0.88 (t,  $J = 6.9$  Hz, 3H);  $^{19}\text{F}$  NMR (377 MHz,  $\text{CDCl}_3$ ):  $\delta$  -139.20 – -139.33 (m, 2F), -143.05 – -143.17 (m, 2F);  $^{13}\text{C}$  NMR (100 MHz,  $\text{CDCl}_3$ ):  $\delta$  159.52 – 159.35 (m), 146.15 – 143.26 (m), 145.78 – 142.96 (m), 125.87 (t,  $J = 15.1$  Hz), 111.29 (t,  $J = 15.5$  Hz), 66.86 (t,  $J = 1.9$  Hz), 63.10, 40.78, 36.84 (t,  $J = 1.7$  Hz), 31.31, 31.25, 25.36, 22.45, 13.94; HRMS (EI): Calcd for  $\text{C}_{16}\text{H}_{20}\text{O}_3\text{F}_4\text{Cl}$   $[\text{M}+\text{H}]^+$  371.1037, found 371.1028.

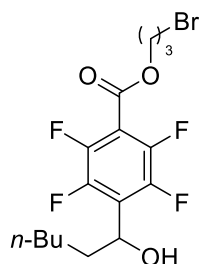

**3-Bromopropyl 2,3,5,6-tetrafluoro-4-(1-hydroxyhexyl)benzoate (3ma):** colorless oil (61 mg, 74%).  $^1\text{H}$  NMR (400 MHz,  $\text{CDCl}_3$ ):  $\delta$  5.08 (q,  $J = 7.7$  Hz, 1H), 4.56 – 4.52 (m, 2H), 3.69 (t,  $J = 6.3$  Hz, 1H), 3.54 (t,  $J = 6.4$  Hz, 1H), 2.33 – 2.27 (m, 1H), 2.26 – 2.19 (m, 2H), 2.06 – 1.96 (m, 1H), 1.89 – 1.76 (m, 1H), 1.51 – 1.40 (m, 1H), 1.37 – 1.28 (m, 5H), 0.88 (t,  $J = 6.8$  Hz, 3H);  $^{19}\text{F}$  NMR (377 MHz,  $\text{CDCl}_3$ ):  $\delta$  -139.16 – -139.32 (m, 2F), -143.03 – -143.19 (m, 2F);  $^{13}\text{C}$  NMR (100 MHz,  $\text{CDCl}_3$ ):  $\delta$  159.49 – 159.36 (m), 146.16 – 143.26 (m), 145.88 – 143.03 (m), 125.80 (t,  $J = 15.0$  Hz), 111.26 (t,  $J = 15.0$  Hz), 66.88 (t,  $J = 1.9$  Hz), 64.11, 40.79, 36.86 (t,  $J = 1.8$  Hz), 31.31, 28.93, 25.36, 22.45, 13.95; HRMS (EI): Calcd for  $\text{C}_{16}\text{H}_{20}\text{O}_3\text{F}_4\text{Br}$   $[\text{M}+\text{H}]^+$  415.0532, found 415.0522.

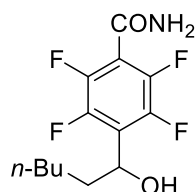

**2,3,5,6-Tetrafluoro-4-(1-hydroxyhexyl)benzamide (3na):** white solid (42 mg, 72%); Mp. 98 – 99 °C.  $^1\text{H}$  NMR (400 MHz,  $\text{CD}_3\text{OD}$ ):  $\delta$  5.04 (t,  $J = 7.3$  Hz, 1H), 2.04 – 1.95 (m, 1H), 1.87 – 1.77 (m, 1H), 1.49 – 1.39 (m, 1H), 1.36 – 1.26 (m, 5H), 0.89 (t,  $J = 6.8$  Hz, 3H);  $^{19}\text{F}$  NMR (377 MHz,  $\text{CD}_3\text{OD}$ ):  $\delta$  -144.88 – -145.15 (m, 4F);  $^{13}\text{C}$  NMR (100 MHz,  $\text{CD}_3\text{OD}$ ):  $\delta$  162.78 (t,  $J = 2.6$  Hz), 147.25 – 144.29 (m), 145.90 – 142.90 (m), 125.65 (t,  $J = 15.2$  Hz), 117.31 – 116.73 (m), 66.72 (t,  $J = 1.8$  Hz), 36.96 (t,  $J = 2.0$  Hz), 32.62, 26.72, 23.59, 14.31; HRMS (EI): Calcd for  $\text{C}_{13}\text{H}_{16}\text{NO}_2\text{F}_4$   $[\text{M}+\text{H}]^+$  294.1117, found 294.1124.

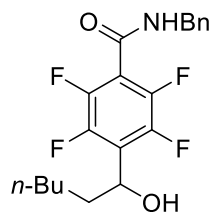

**N-benzyl-2,3,5,6-tetrafluoro-4-(1-hydroxyhexyl)benzamide (30a):** yellow solid (73 mg, 95%); Mp. 76 – 77 °C. <sup>1</sup>H NMR (400 MHz, CDCl<sub>3</sub>): δ 7.39 – 7.28 (m, 5H), 6.38 (s, 1H), 5.04 (t, *J* = 7.3 Hz, 1H), 4.64 (d, *J* = 5.7 Hz, 2H), 2.39 (s, 1H), 2.06 – 1.93 (m, 1H), 1.86 – 1.74 (m, 1H), 1.48 – 1.38 (m, 1H), 1.35 – 1.27 (m, 5H), 0.88 (t, *J* = 6.8 Hz, 3H); <sup>19</sup>F NMR (377 MHz, CDCl<sub>3</sub>): δ -141.21 - -141.32 (m, 2F), -142.84 – -142.96 (m, 2F); <sup>13</sup>C NMR (100 MHz, CDCl<sub>3</sub>): δ 158.10 (t, *J* = 2.6 Hz), 145.79 – 142.96 (m), 144.97 – 142.21 (m), 136.87, 128.87, 127.89, 127.75, 124.48 (t, *J* = 15.1 Hz), 114.88 (t, *J* = 18.4 Hz), 66.74 (t, *J* = 1.6 Hz), 44.26, 36.79 (t, *J* = 1.5 Hz), 31.32, 25.36, 22.43, 13.91; HRMS (EI): Calcd for C<sub>20</sub>H<sub>22</sub>NO<sub>2</sub>F<sub>4</sub> [M+H]<sup>+</sup> 384.1587, found 384.1586.

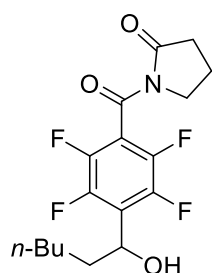

**1-(2,3,5,6-Tetrafluoro-4-(1-hydroxyhexyl)benzoyl)pyrrolidin-2-one (3pa):** colorless oil (67 mg, 93%). <sup>1</sup>H NMR (400 MHz, CDCl<sub>3</sub>): δ 5.07 (q, *J* = 7.5 Hz, 1H), 4.01 (t, *J* = 7.3 Hz, 2H), 2.64 (t, *J* = 8.1 Hz, 2H), 2.21 – 2.14 (m, 3H), 2.05 – 1.96 (m, 1H), 1.88 – 1.79 (m, 1H), 1.51 – 1.42 (m, 1H), 1.37 – 1.27 (m, 5H), 0.88 (t, *J* = 6.8 Hz, 3H); <sup>19</sup>F NMR (377 MHz, CDCl<sub>3</sub>): δ -142.61 – -142.74 (m, 2F), -143.86 – -144.00 (m, 2F); <sup>13</sup>C NMR (100 MHz, CDCl<sub>3</sub>): δ 174.11, 158.07 – 157.97 (m), 145.55 – 142.62 (m), 144.30 – 141.51 (m), 124.20 (t, *J* = 15.0 Hz), 115.10 (t, *J* = 18.2 Hz), 66.87 (t, *J* = 1.8 Hz), 45.39, 36.85 (t, *J* = 1.6 Hz), 32.77, 31.35, 25.42, 22.45, 17.22, 13.94; HRMS (EI): Calcd for C<sub>17</sub>H<sub>20</sub>NO<sub>3</sub>F<sub>4</sub> [M+H]<sup>+</sup> 362.1379, found 362.1382.

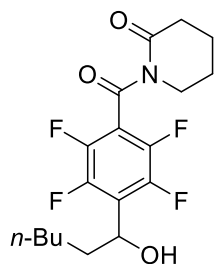

**1-(2,3,5,6-Tetrafluoro-4-(1-hydroxyhexyl)benzoyl)piperidin-2-one (3qa):** colorless oil (73 mg, 98%).  $^1\text{H}$  NMR (400 MHz,  $\text{CDCl}_3$ ):  $\delta$  5.05 (q,  $J = 7.3$  Hz, 1H), 3.90 (t,  $J = 5.9$  Hz, 2H), 2.57 (t,  $J = 6.4$  Hz, 2H), 2.18 (d,  $J = 8.2$  Hz, 1H), 2.03 – 1.89 (m, 5H), 1.86 – 1.77 (m, 1H), 1.52 – 1.41 (m, 1H), 1.36 – 1.27 (m, 5H), 0.88 (t,  $J = 6.8$  Hz, 3H);  $^{19}\text{F}$  NMR (377 MHz,  $\text{CDCl}_3$ ):  $\delta$  -144.00 – -144.26 (m, 4F);  $^{13}\text{C}$  NMR (100 MHz,  $\text{CDCl}_3$ ):  $\delta$  172.68, 161.04 – 160.95 (m), 145.63 – 142.72 (m), 143.86 – 140.91 (m), 123.46 – 123.13 (m), 117.52 – 117.18 (m), 66.81 (t,  $J = 1.8$  Hz), 45.01, 36.86 (t,  $J = 1.5$  Hz), 34.21, 31.36, 25.44, 22.45, 22.31, 20.47, 13.96; HRMS (EI): Calcd for  $\text{C}_{18}\text{H}_{21}\text{NO}_3\text{F}_4\text{Na}$   $[\text{M}+\text{Na}]^+$  398.1355, found 398.1345.

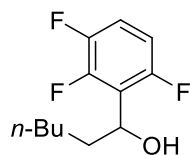

**1-(2,3,6-Trifluorophenyl)hexan-1-ol (3ra):** white solid (10 mg, 22%); Mp. 79 – 80 °C.  $^1\text{H}$  NMR (400 MHz,  $\text{CDCl}_3$ ):  $\delta$  7.09 – 7.01 (m, 1H), 6.85 – 6.78 (m, 1H), 5.03 (q,  $J = 7.6$  Hz, 1H), 2.18 (d,  $J = 8.3$  Hz, 1H), 2.04 – 1.95 (m, 1H), 1.88 – 1.78 (m, 1H), 1.50 – 1.41 (m, 1H), 1.34 – 1.28 (m, 5H), 0.88 (t,  $J = 6.8$  Hz, 3H);  $^{19}\text{F}$  NMR (377 MHz,  $\text{CDCl}_3$ ):  $\delta$  -120.55 – -120.64 (m, 1F), -138.79 (dd,  $J = 21.1, 8.6$  Hz, 1F), -142.07 – -142.20 (m, 1F);  $^{13}\text{C}$  NMR (100 MHz,  $\text{CDCl}_3$ ):  $\delta$  157.21 (dd,  $J = 6.3, 2.5$  Hz), 154.78 (dd,  $J = 7.0, 2.7$  Hz), 149.82 – 147.00 (m), 148.47 – 145.86 (m), 115.73 (ddd,  $J = 19.5, 10.6, 1.5$  Hz), 111.02 (ddd,  $J = 25.2, 6.3, 4.3$  Hz), 66.81 (q,  $J = 1.8$  Hz), 37.12 (t,  $J = 1.4$  Hz), 31.40, 25.50, 22.49, 13.97; HRMS (EI): Calcd for  $\text{C}_{12}\text{H}_{16}\text{OF}_3$   $[\text{M}+\text{H}]^+$  233.1153, found 233.1148.

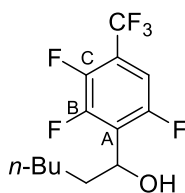

91% (A:B:C = 78:21:1)

**1-(2,3,6-trifluoro-4-(trifluoromethyl)phenyl)hexan-1-ol (3sa):** colorless oil (55 mg, 91%). Major component:  $^1\text{H}$  NMR (400 MHz,  $\text{CDCl}_3$ ):  $\delta$  7.12 (ddd,  $J = 9.7, 5.0, 2.2$  Hz, 1H), 5.06 (t,  $J = 7.6$  Hz, 1H), 2.30 (s, 1H), 2.07 – 1.96 (m, 1H), 1.88 – 1.77 (m, 1H), 1.52 – 1.39 (m, 1H), 1.36 – 1.28 (m, 5H), 0.88 (t,  $J = 6.8$  Hz, 3H);  $^{19}\text{F}$  NMR (377 MHz,  $\text{CDCl}_3$ ):  $\delta$  -61.38 (d,  $J = 12.9$  Hz, 3F), -117.73 (ddd,  $J = 14.5, 9.4, 4.1$  Hz, 1F), -135.40 (d,  $J = 20.4$  Hz, 1F), -142.77 – -143.00 (m, 1F);  $^{13}\text{C}$  NMR (100 MHz,  $\text{CDCl}_3$ ):  $\delta$  155.16 (ddd,  $J = 247.0, 7.2, 3.6$  Hz), 149.11 (ddd,  $J = 252.5, 13.5, 9.0$  Hz), 146.38 – 143.54 (m), 126.06 (dd,  $J = 18.4, 13.5$  Hz), 121.34 (qt,  $J = 271.2, 3.3$  Hz), 119.53 (qt,  $J = 50.4, 2.8$  Hz), 109.00 (dp,  $J = 28.7, 4.3$  Hz), 66.69 (d,  $J = 1.5$  Hz), 36.84 (t,  $J = 1.5$  Hz), 31.34, 25.40, 22.45, 13.91; HRMS (EI): Calcd for  $\text{C}_{13}\text{H}_{15}\text{OF}_6$   $[\text{M}+\text{H}]^+$  301.2444, found 301.2446.

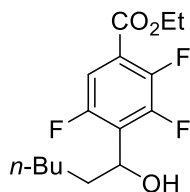

**Ethyl 2,3,5-trifluoro-4-(1-hydroxyhexyl)benzoate (3ta):** colorless oil (57 mg, 93%).  $^1\text{H}$  NMR (400 MHz,  $\text{CDCl}_3$ ):  $\delta$  7.42 (ddd,  $J = 10.4, 5.1, 2.3$  Hz, 1H), 5.04 (q,  $J = 7.6$  Hz, 1H), 4.40 (q,  $J = 7.2$  Hz, 2H), 2.24 (d,  $J = 8.6$  Hz, 1H), 2.04 – 1.95 (m, 1H), 1.87 – 1.76 (m, 1H), 1.51 – 1.43 (m, 1H), 1.40 (t,  $J = 7.1$  Hz, 3H), 1.34 – 1.27 (m, 5H), 0.88 (t,  $J = 6.8$  Hz, 3H);  $^{19}\text{F}$  NMR (377 MHz,  $\text{CDCl}_3$ ):  $\delta$  -119.71 (ddd,  $J = 15.1, 10.3, 3.3$  Hz, 1F), -136.83 (dt,  $J = 19.9, 2.9$  Hz, 1F), -138.82 (ddd,  $J = 20.5, 15.9, 5.1$  Hz, 1F);  $^{13}\text{C}$  NMR (100 MHz,  $\text{CDCl}_3$ ):  $\delta$  162.50 – 162.37 (m), 156.29 – 153.61 (m), 150.55 – 147.66 (m), 148.61 – 145.74 (m), 126.18 (dd,  $J = 18.7, 13.9$  Hz), 119.36 (t,  $J = 9.2$  Hz), 112.83 (dd,  $J = 26.9, 3.8$  Hz), 66.83 – 66.75 (m), 62.06, 36.92 (t,  $J = 1.5$  Hz), 31.35, 25.39, 22.46, 14.14, 13.94; HRMS (EI): Calcd for  $\text{C}_{15}\text{H}_{20}\text{O}_3\text{F}_3$   $[\text{M}+\text{H}]^+$  305.1365, found 305.1361.

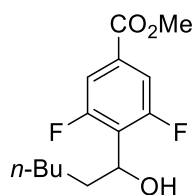

**Methyl 3,5-difluoro-4-(1-hydroxyhexyl)benzoate (3ua):** colorless oil (52 mg, 95%).  
 $^1\text{H}$  NMR (400 MHz,  $\text{CDCl}_3$ ):  $\delta$  7.57 – 7.50 (m, 2H), 5.05 (t,  $J = 7.3$  Hz, 1H), 3.92 (s, 3H), 2.27 (s, 1H), 2.03 – 1.94 (m, 1H), 1.86 – 1.77 (m, 1H), 1.49 – 1.41 (m, 1H), 1.35 – 1.27 (m, 5H), 0.87 (t,  $J = 6.8$  Hz, 3H);  $^{19}\text{F}$  NMR (377 MHz,  $\text{CDCl}_3$ ):  $\delta$  -113.75 (d,  $J = 8.2$  Hz, 2F);  $^{13}\text{C}$  NMR (100 MHz,  $\text{CDCl}_3$ ):  $\delta$  164.78 (t,  $J = 3.3$  Hz), 160.55 (dd,  $J = 248.7, 8.8$  Hz), 131.29 (t,  $J = 10.0$  Hz), 124.68 (t,  $J = 16.9$  Hz), 113.17 – 112.80 (m), 66.65 (t,  $J = 2.3$  Hz), 52.65, 37.10 (t,  $J = 1.4$  Hz), 31.39, 25.45, 22.47, 13.93; HRMS (EI): Calcd for  $\text{C}_{14}\text{H}_{18}\text{O}_3\text{F}_2\text{Na}$   $[\text{M}+\text{Na}]^+$  295.1122, found 295.1120.

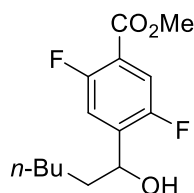

**Methyl 2,5-difluoro-4-(1-hydroxyhexyl)benzoate (3va):** colorless oil (24 mg, 44%).  
 $^1\text{H}$  NMR (400 MHz,  $\text{CDCl}_3$ ):  $\delta$  7.60 – 7.55 (m, 1H), 7.33 – 7.28 (m, 1H), 5.01 (t,  $J = 8.4$  Hz, 1H), 3.93 (s, 3H), 2.03 (s, 1H), 1.78 – 1.70 (m, 2H), 1.50 – 1.40 (m, 1H), 1.38 – 1.27 (m, 5H), 0.88 (t,  $J = 6.8$  Hz, 3H);  $^{19}\text{F}$  NMR (377 MHz,  $\text{CDCl}_3$ ):  $\delta$  -114.14 – -114.24 (m, 1F), -124.29 – -124.43 (m, 1F);  $^{13}\text{C}$  NMR (100 MHz,  $\text{CDCl}_3$ ):  $\delta$  163.80 (dd,  $J = 4.2, 2.1$  Hz), 158.18 (dd,  $J = 256.9, 2.2$  Hz), 154.62 (dd,  $J = 242.7, 2.5$  Hz), 139.39 (dd,  $J = 16.3, 7.8$  Hz), 118.09 (dd,  $J = 26.5, 1.7$  Hz), 117.93 (t,  $J = 10.1$  Hz), 115.64 (dd,  $J = 26.2, 4.9$  Hz), 67.81 (t,  $J = 1.1$  Hz), 52.52, 37.88, 31.48, 25.01, 22.49, 13.95; HRMS (EI): Calcd for  $\text{C}_{14}\text{H}_{19}\text{O}_3\text{F}_2$   $[\text{M}+\text{H}]^+$  273.1302, found 273.1302.

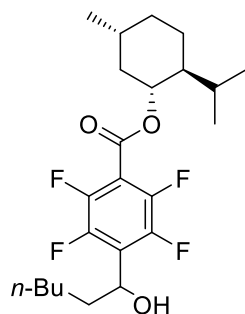

**(1R,2S,5R)-2-isopropyl-5-methylcyclohexyl**      **2,3,5,6-tetrafluoro-4-(1-hydroxyhexyl)benzoate (3wa)**: colorless oil (43 mg, 50%). <sup>1</sup>H NMR (400 MHz, CDCl<sub>3</sub>): δ 5.07 (q, *J* = 7.7 Hz, 1H), 4.98 (td, *J* = 10.9, 4.4 Hz, 1H), 2.25 (d, *J* = 8.4 Hz, 1H), 2.19 – 2.12 (m, 1H), 2.05 – 1.94 (m, 2H), 1.87 – 1.77 (m, 1H), 1.76 – 1.69 (m, 2H), 1.59 – 1.40 (m, 4H), 1.37 – 1.27 (m, 6H), 1.17 – 1.04 (m, 3H), 0.94 (d, *J* = 6.5 Hz, 3H), 0.91 (d, *J* = 7.0 Hz, 4H), 0.80 (d, *J* = 7.0 Hz, 3H); <sup>19</sup>F NMR (377 MHz, CDCl<sub>3</sub>): δ -140.00 – -140.13 (m, 2F), -143.39 – -143.52 (m, 2F); <sup>13</sup>C NMR (100 MHz, CDCl<sub>3</sub>): δ 159.33 – 159.23 (m), 145.76 – 142.96 (m), 145.47 – 142.80 (m), 125.01 (t, *J* = 15.0 Hz), 112.54 (t, *J* = 16.8 Hz), 66.85 (t, *J* = 1.8 Hz), 46.82, 40.57, 36.89 (t, *J* = 1.5 Hz), 34.03, 31.47, 31.33, 25.85, 25.37, 23.02, 22.46, 21.95, 20.80, 15.85, 13.96; HRMS (EI): Calcd for C<sub>23</sub>H<sub>33</sub>O<sub>3</sub>F<sub>4</sub> [M+H]<sup>+</sup> 433.2366, found 433.2357.

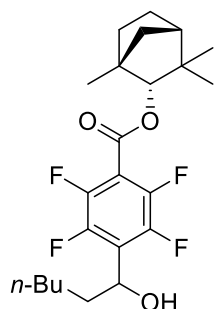

**(1R,2R,4S)-1,3,3-trimethylbicyclo[2.2.1]heptan-2-yl**      **2,3,5,6-tetrafluoro-4-(1-hydroxyhexyl)benzoate (3xa)**: colorless oil (77 mg, 89%). <sup>1</sup>H NMR (400 MHz, CDCl<sub>3</sub>): δ 5.08 (q, *J* = 8.0 Hz, 1H), 4.63 (d, *J* = 2.0 Hz, 1H), 2.25 (d, *J* = 8.2 Hz, 1H), 2.06 – 1.97 (m, 1H), 1.88 – 1.82 (m, 1H), 1.81 – 1.59 (m, 5H), 1.53 – 1.42 (m, 2H), 1.38 – 1.23 (m, 8H), 1.19 (s, 3H), 1.11 (s, 3H), 0.89 (s, 1H), 0.87 (s, 3H); <sup>19</sup>F NMR (377 MHz, CDCl<sub>3</sub>): δ -139.28 – -139.40 (m, 2F), -143.37 – -143.49 (m, 2F); <sup>13</sup>C NMR (100 MHz, CDCl<sub>3</sub>): δ 160.11 – 159.98 (m), 146.01 – 143.24 (m), 145.72 – 143.00 (m), 125.33 (t, *J* = 15.2 Hz), 112.06 (t, *J* = 16.1 Hz), 89.56, 66.89, 48.45, 48.34, 41.34, 39.59, 36.89, 31.34, 29.64, 26.61, 25.71, 25.40, 22.45, 20.13, 19.20, 13.94; HRMS (EI): Calcd for C<sub>23</sub>H<sub>30</sub>O<sub>3</sub>F<sub>4</sub>Na [M+Na]<sup>+</sup> 453.2029, found 453.2036.

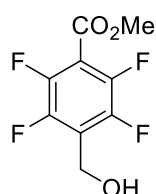

**Methyl 2,3,5,6-tetrafluoro-4-(hydroxymethyl)benzoate (3ab):** The reaction was performed using 0.2 mmol of fluoroarenes and 1 mmol of alcohols; colorless oil (23 mg, 49%). <sup>1</sup>H NMR (400 MHz, CDCl<sub>3</sub>): δ 4.84 (s, 2H), 3.99 (s, 3H), 2.12 (s, 1H); <sup>19</sup>F NMR (377 MHz, CDCl<sub>3</sub>): δ -139.24 – -139.34 (m, 2F), -143.40 – -143.51 (m, 2F); <sup>13</sup>C NMR (100 MHz, CDCl<sub>3</sub>): δ 160.09 – 160.03 (m), 146.31 – 143.59 (m), 145.88 – 143.08 (m), 121.63 (t, *J* = 17.6 Hz), 112.45 (t, *J* = 16.2 Hz), 53.34, 53.00 – 52.90 (m); HRMS (EI): Calcd for C<sub>9</sub>H<sub>7</sub>O<sub>3</sub>F<sub>4</sub> [M+H]<sup>+</sup> 239.0331, found 239.0332.

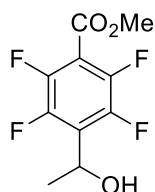

**Methyl 2,3,5,6-tetrafluoro-4-(1-hydroxyethyl)benzoate (3ac):** The reaction was performed using 0.2 mmol of fluoroarenes and 1 mmol of alcohols; colorless oil (46 mg, 92%). <sup>1</sup>H NMR (400 MHz, CDCl<sub>3</sub>): δ 5.29 (p, *J* = 6.9 Hz, 1H), 3.98 (s, 3H), 2.31 (d, *J* = 7.8 Hz, 1H), 1.66 (d, *J* = 6.7 Hz, 3H); <sup>19</sup>F NMR (377 MHz, CDCl<sub>3</sub>): δ -139.27 – -139.43 (m, 2F), -143.81 – -143.95 (m, 2F); <sup>13</sup>C NMR (100 MHz, CDCl<sub>3</sub>): δ 160.14 – 160.04 (m), 146.04 – 143.17 (m), 145.64 – 142.92 (m), 126.26 (t, *J* = 14.8 Hz), 111.50 (t, *J* = 15.8 Hz), 62.66 (t, *J* = 1.5 Hz), 53.28, 23.02 (t, *J* = 1.0 Hz); HRMS (EI): Calcd for C<sub>10</sub>H<sub>8</sub>O<sub>3</sub>F<sub>4</sub>Na [M+Na]<sup>+</sup> 275.0307, found 275.0316.

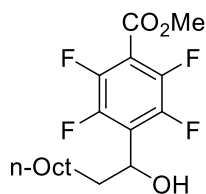

**Methyl 2,3,5,6-tetrafluoro-4-(1-hydroxydecyl)benzoate (3ad):** The reaction was performed using 0.2 mmol of fluoroarenes and 0.3 mmol of alcohols; colorless oil (64 mg, 88%). <sup>1</sup>H NMR (400 MHz, CDCl<sub>3</sub>): δ 5.07 (t, *J* = 7.3 Hz, 1H), 3.98 (s, 3H), 2.24 (s, 1H), 2.05 – 1.96 (m, 1H), 1.87 – 1.77 (m, 1H), 1.49 – 1.40 (m, 1H), 1.34 – 1.21 (m, 13H), 0.87 (t, *J* = 6.8 Hz, 3H); <sup>19</sup>F NMR (377 MHz, CDCl<sub>3</sub>): δ -139.31 – -139.47 (m, 2F), -143.18 – -143.33 (m, 2F); <sup>13</sup>C NMR (100 MHz, CDCl<sub>3</sub>): δ 160.17 – 160.08 (m), 146.00 – 143.19 (m), 145.69 – 143.03 (m), 125.70 (t, *J* = 15.0 Hz), 111.47 (t, *J* = 16.0 Hz), 66.88, 53.28, 36.89, 31.82, 29.44, 29.39, 29.23, 29.15, 25.69, 22.64, 14.07; HRMS



(EI): Calcd for C<sub>18</sub>H<sub>24</sub>O<sub>3</sub>F<sub>4</sub>Na [M+Na]<sup>+</sup> 387.1559, found 387.1562.

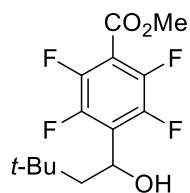

**Methyl 2,3,5,6-tetrafluoro-4-(1-hydroxy-3,3-dimethylbutyl)benzoate (3ae):**

colorless oil (52 mg, 85%). <sup>1</sup>H NMR (400 MHz, CDCl<sub>3</sub>): δ 5.25 (td, *J* = 8.3, 4.0 Hz, 1H), 3.97 (s, 3H), 2.14 (d, *J* = 8.5 Hz, 1H), 1.99 (ddt, *J* = 14.6, 8.3, 1.4 Hz, 1H), 1.71 (dd, *J* = 14.6, 4.1 Hz, 1H), 1.00 (s, 9H); <sup>19</sup>F NMR (377 MHz, CDCl<sub>3</sub>): δ -139.20 – -139.33 (m, 2F), -143.45 – -143.57 (m, 2F); <sup>13</sup>C NMR (100 MHz, CDCl<sub>3</sub>): δ 160.14 – 160.09 (m), 146.08 – 143.27 (m), 145.51 – 142.80 (m), 126.99 (t, *J* = 15.1 Hz), 111.35 (t, *J* = 15.8 Hz), 64.39 (t, *J* = 1.5 Hz), 53.25, 50.75, 30.64, 29.75; HRMS (EI): Calcd for C<sub>14</sub>H<sub>16</sub>O<sub>3</sub>F<sub>4</sub>Na [M+Na]<sup>+</sup> 331.0933, found 331.0933.

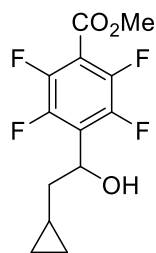

**Methyl 4-(2-cyclopropyl-1-hydroxyethyl)-2,3,5,6-tetrafluorobenzoate (3af):** The reaction was performed using 0.2 mmol of fluoroarenes and 0.3 mmol of alcohols; colorless oil (46 mg, 78%). <sup>1</sup>H NMR (400 MHz, CDCl<sub>3</sub>): δ 5.21 (q, *J* = 7.0 Hz, 1H), 3.98 (s, 3H), 2.39 (d, *J* = 7.8 Hz, 1H), 2.00 (dt, *J* = 13.9, 7.0 Hz, 1H), 1.70 (dt, *J* = 14.2, 7.2 Hz, 1H), 0.74 – 0.64 (m, 1H), 0.57 – 0.48 (m, 1H), 0.47 – 0.38 (m, 1H), 0.18 – 0.12 (m, 1H), 0.03 – -0.03 (m, 1H); <sup>19</sup>F NMR (377 MHz, CDCl<sub>3</sub>): δ -139.43 – -139.56 (m, 2F), -142.99 – -143.13 (m, 2F); <sup>13</sup>C NMR (100 MHz, CDCl<sub>3</sub>): δ 160.24 – 160.02 (m), 145.98 – 143.32 (m), 145.79 – 143.13 (m), 125.59 (t, *J* = 15.0 Hz), 111.51 (t, *J* = 15.9 Hz), 67.22 (t, *J* = 1.5 Hz), 53.27, 41.60, 7.21, 4.14, 3.98; HRMS (EI): Calcd for C<sub>13</sub>H<sub>13</sub>O<sub>3</sub>F<sub>4</sub> [M+H]<sup>+</sup> 293.0801, found 293.0796.

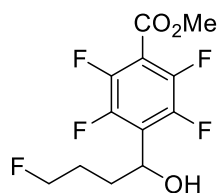

**Methyl 2,3,5,6-tetrafluoro-4-(4-fluoro-1-hydroxybutyl)benzoate (3ag):** colorless oil (36 mg, 60%).  $^1\text{H}$  NMR (400 MHz,  $\text{CDCl}_3$ ):  $\delta$  5.13 (q,  $J = 7.9$  Hz, 1H), 4.60 – 4.54 (m, 1H), 4.48 – 4.42 (m, 1H), 3.98 (s, 3H), 2.36 (d,  $J = 8.1$  Hz, 1H), 2.20 – 2.12 (m, 1H), 2.01 – 1.91 (m, 2H), 1.80 – 1.68 (m, 1H);  $^{19}\text{F}$  NMR (377 MHz,  $\text{CDCl}_3$ ):  $\delta$  -140.02 – -140.13 (m, 2F), -142.59 – -142.69 (m, 2F), -217.52 – -217.90 (m, 1F);  $^{13}\text{C}$  NMR (100 MHz,  $\text{CDCl}_3$ ):  $\delta$  160.01 – 159.96 (m), 146.06 – 143.24 (m), 145.73 – 143.01 (m), 125.10 (t,  $J = 15.0$  Hz), 111.85 (t,  $J = 16.1$  Hz), 83.27 (d,  $J = 165.7$  Hz), 66.41 (t,  $J = 1.5$  Hz), 53.31, 32.77 (d,  $J = 4.4$  Hz), 26.91 (d,  $J = 20.1$  Hz); HRMS (EI): Calcd for  $\text{C}_{12}\text{H}_{11}\text{O}_3\text{F}_5\text{Na}$   $[\text{M}+\text{Na}]^+$  321.0526, found 321.0534.

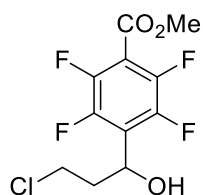

**Methyl 4-(3-chloro-1-hydroxypropyl)-2,3,5,6-tetrafluorobenzoate (3ah):** colorless oil (26 mg, 44%).  $^1\text{H}$  NMR (400 MHz,  $\text{CDCl}_3$ ):  $\delta$  5.43 – 5.38 (m, 1H), 3.98 (s, 3H), 3.82 – 3.76 (m, 1H), 3.68 – 3.63 (m, 1H), 2.58 – 2.49 (m, 1H), 2.41 (d,  $J = 6.8$  Hz, 1H), 2.23 – 2.13 (m, 1H);  $^{19}\text{F}$  NMR (377 MHz,  $\text{CDCl}_3$ ):  $\delta$  -138.76 – -138.91 (m, 2F), -142.58 – -142.74 (m, 2F);  $^{13}\text{C}$  NMR (100 MHz,  $\text{CDCl}_3$ ):  $\delta$  159.96 – 159.92 (m), 146.06 – 143.29 (m), 145.79 – 143.12 (m), 124.28 (t,  $J = 14.9$  Hz), 112.13 (t,  $J = 15.7$  Hz), 63.44 (t,  $J = 1.9$  Hz), 53.37, 40.76, 38.60 (t,  $J = 2.0$  Hz); HRMS (EI): Calcd for  $\text{C}_{11}\text{H}_{10}\text{O}_3\text{F}_4\text{Cl}$   $[\text{M}+\text{H}]^+$  301.0255, found 301.0249.

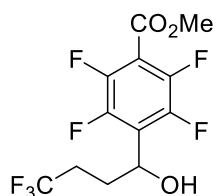

**Methyl 2,3,5,6-tetrafluoro-4-(4,4,4-trifluoro-1-hydroxybutyl)benzoate (3ai):** colorless oil (47 mg, 70%).  $^1\text{H}$  NMR (400 MHz,  $\text{CDCl}_3$ ):  $\delta$  5.13 (td,  $J = 8.4, 4.7$  Hz,

1H), 3.99 (s, 3H), 2.45 – 2.36 (m, 2H), 2.34 – 2.14 (m, 2H), 2.09 – 2.00 (m, 1H); <sup>19</sup>F NMR (377 MHz, CDCl<sub>3</sub>): δ -66.23 (t, *J* = 10.3 Hz, 3F), -138.49 – -138.62 (m, 2F), -142.89 – -143.05 (m, 2F); <sup>13</sup>C NMR (100 MHz, CDCl<sub>3</sub>): δ 159.87 – 159.77 (m), 146.11 – 143.26 (m), 145.70 – 142.91 (m), 126.69 (q, *J* = 274.4 Hz), 124.10 (t, *J* = 14.8 Hz), 112.33 (t, *J* = 15.9 Hz), 65.29 (t, *J* = 2.1 Hz), 53.40, 30.49 (q, *J* = 29.6 Hz), 29.10 (q, *J* = 2.2 Hz); HRMS (EI): Calcd for C<sub>12</sub>H<sub>10</sub>O<sub>3</sub>F<sub>7</sub> [M+H]<sup>+</sup> 335.0518, found 335.0516.

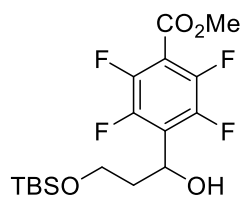

**Methyl 4-(3-((tert-butyldimethylsilyl)oxy)-1-hydroxypropyl)-2,3,5,6-tetrafluorobenzoate (3aj):** The reaction was performed using 0.2 mmol of fluoroarenes and 0.3 mmol of alcohols; colorless oil (59 mg, 75%). <sup>1</sup>H NMR (400 MHz, CDCl<sub>3</sub>): δ 5.38 (dt, *J* = 8.7, 4.2 Hz, 1H), 3.97 (s, 3H), 3.95 – 3.89 (m, 1H), 3.87 – 3.81 (m, 1H), 3.68 (d, *J* = 5.0 Hz, 1H), 2.32 – 2.23 (m, 1H), 1.98 – 1.91 (m, 1H), 0.90 (s, 9H), 0.09 (d, *J* = 2.1 Hz, 6H); <sup>19</sup>F NMR (377 MHz, CDCl<sub>3</sub>): δ -139.65 – -139.86 (m, 2F), -142.56 – -142.82 (m, 2F); <sup>13</sup>C NMR (100 MHz, CDCl<sub>3</sub>): δ 160.20 – 160.12 (m), 146.02 – 143.35 (m), 145.85 – 143.21 (m), 125.32 (t, *J* = 14.6 Hz), 111.48 (t, *J* = 15.8 Hz), 66.05, 61.36, 53.21, 37.84, 25.74, 18.07, -5.63 (d, *J* = 0.6 Hz); HRMS (EI): Calcd for C<sub>17</sub>H<sub>24</sub>O<sub>4</sub>F<sub>4</sub>NaSi [M+Na]<sup>+</sup> 419.1278, found 419.1280.

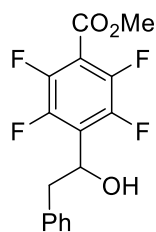

**Methyl 2,3,5,6-tetrafluoro-4-(1-hydroxy-2-phenylethyl)benzoate (3ak):** The reaction was performed using 0.2 mmol of fluoroarenes and 0.3 mmol of alcohols; white solid (33 mg, 51%); Mp. 85 – 86 °C. <sup>1</sup>H NMR (400 MHz, CDCl<sub>3</sub>): δ 7.33 – 7.29 (m, 2H), 7.27 – 7.25 (m, 1H), 7.17 (d, *J* = 6.7 Hz, 2H), 5.33 (q, *J* = 7.2 Hz, 1H), 3.97 (s, 3H), 3.32 (dd, *J* = 13.5, 8.0 Hz, 1H), 3.12 (dd, *J* = 13.5, 6.4 Hz, 1H), 2.39 (d, *J* = 7.2 Hz, 1H); <sup>19</sup>F NMR (377 MHz, CDCl<sub>3</sub>): δ -139.19 – -139.42 (m, 2F), -142.61 – -142.80

(m, 2F);  $^{13}\text{C}$  NMR (100 MHz,  $\text{CDCl}_3$ ):  $\delta$  160.11 – 159.99 (m), 145.97 – 143.20 (m), 145.72 – 143.05 (m), 135.97, 129.16, 128.79, 127.25, 124.57 (t,  $J = 14.8$  Hz), 111.71 (t,  $J = 15.8$  Hz), 67.70 (t,  $J = 1.5$  Hz), 53.28, 42.97 (t,  $J = 1.5$  Hz); HRMS (EI): Calcd for  $\text{C}_{16}\text{H}_{12}\text{O}_3\text{F}_4\text{Na}$   $[\text{M}+\text{Na}]^+$  351.0620, found 351.0629.

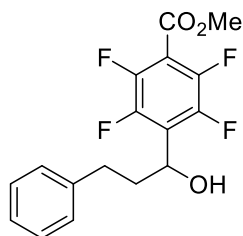

**Methyl 2,3,5,6-tetrafluoro-4-(1-hydroxy-3-phenylpropyl)benzoate (3al):** The reaction was performed using 0.2 mmol of fluoroarenes and 0.3 mmol of alcohols; white solid (39 mg, 57%); Mp. 63 – 64 °C.  $^1\text{H}$  NMR (400 MHz,  $\text{CDCl}_3$ ):  $\delta$  7.29 (t,  $J = 7.2$  Hz, 2H), 7.22 – 7.16 (m, 3H), 5.10 (q,  $J = 7.1$  Hz, 1H), 3.98 (s, 3H), 2.88 – 2.81 (m, 1H), 2.71 – 2.63 (m, 1H), 2.41 – 2.33 (m, 1H), 2.31 (d,  $J = 10.3$  Hz, 1H), 2.21 – 2.11 (m, 1H);  $^{19}\text{F}$  NMR (377 MHz,  $\text{CDCl}_3$ ):  $\delta$  -139.12 – -139.36 (m, 2F), -142.88 – -143.06 (m, 2F);  $^{13}\text{C}$  NMR (100 MHz,  $\text{CDCl}_3$ ):  $\delta$  160.09 – 159.99 (m), 146.00 – 143.20 (m), 145.74 – 142.99 (m), 140.30, 128.53, 128.28, 126.26, 125.28 (t,  $J = 15.0$  Hz), 111.67 (t,  $J = 15.8$  Hz), 66.16 (t,  $J = 1.8$  Hz), 53.30, 38.05 (t,  $J = 1.8$  Hz), 31.94; HRMS (EI): Calcd for  $\text{C}_{17}\text{H}_{14}\text{O}_3\text{F}_4\text{Na}$   $[\text{M}+\text{Na}]^+$  365.0777, found 365.0777.

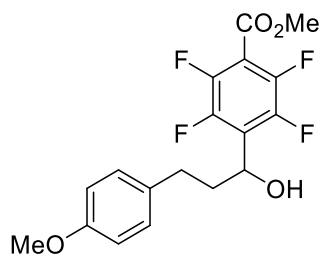

**Methyl 2,3,5,6-tetrafluoro-4-(1-hydroxy-3-(4-methoxyphenyl)propyl)benzoate (3am):** The reaction was performed using 0.2 mmol of fluoroarenes and 0.3 mmol of alcohols; colorless oil (31 mg, 41%).  $^1\text{H}$  NMR (400 MHz,  $\text{CDCl}_3$ ):  $\delta$  7.09 (d,  $J = 8.6$  Hz, 2H), 6.82 (d,  $J = 8.6$  Hz, 2H), 5.09 (t,  $J = 7.2$  Hz, 1H), 3.98 (s, 3H), 3.78 (s, 3H), 2.82 – 2.74 (m, 1H), 2.67 – 2.55 (m, 1H), 2.39 – 2.07 (m, 3H);  $^{19}\text{F}$  NMR (377 MHz,  $\text{CDCl}_3$ ):  $\delta$  -139.21 – -139.33 (m, 2F), -142.88 – -143.05 (m, 2F);  $^{13}\text{C}$  NMR (100 MHz,  $\text{CDCl}_3$ ):  $\delta$  160.08 – 160.02 (m), 158.07, 146.00 – 143.19 (m), 145.68 – 143.01 (m),

132.30, 129.20, 125.36 (t,  $J = 15.0$  Hz), 113.94, 111.62 (t,  $J = 16.1$  Hz), 66.13 (t,  $J = 1.9$  Hz), 55.25, 53.28, 38.26, 31.03; HRMS (EI): Calcd for  $C_{18}H_{17}F_4O_4$   $[M+H]^+$  373.3156, found 373.3158.

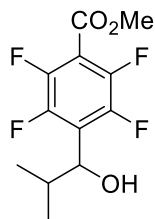

**Methyl 2,3,5,6-tetrafluoro-4-(1-hydroxy-2-methylpropyl)benzoate (3an):** colorless oil (49 mg, 87%).  $^1H$  NMR (400 MHz,  $CDCl_3$ ):  $\delta$  4.68 (d,  $J = 9.0$  Hz, 1H), 3.98 (s, 3H), 2.26 (s, 1H), 2.22 – 2.10 (m, 1H), 1.15 (d,  $J = 6.6$  Hz, 3H), 0.81 (d,  $J = 6.8$  Hz, 3H);  $^{19}F$  NMR (377 MHz,  $CDCl_3$ ):  $\delta$  -139.37 – -139.49 (m, 2F), -142.06 – -142.18 (m, 2F);  $^{13}C$  NMR (100 MHz,  $CDCl_3$ ):  $\delta$  160.15 – 160.10 (m), 145.96 – 143.24 (m), 145.71 – 143.08 (m), 125.11 (t,  $J = 15.2$  Hz), 111.51 (t,  $J = 16.1$  Hz), 72.75, 53.29, 34.27 (t,  $J = 1.6$  Hz), 19.11, 18.66; HRMS (EI): Calcd for  $C_{12}H_{12}O_3F_4Na$   $[M+Na]^+$  303.0620, found 303.0622.

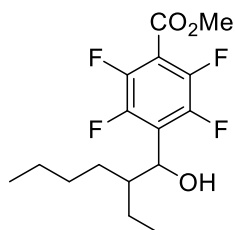

**Methyl 4-(2-ethyl-1-hydroxyhexyl)-2,3,5,6-tetrafluorobenzoate (dr = 1:1) (3ao):** The reaction was performed using 0.2 mmol of fluoroarenes and 0.3 mmol of alcohols; colorless oil (33 mg, 49%).  $^1H$  NMR (400 MHz,  $CDCl_3$ ):  $\delta$  4.93 (t,  $J = 8.6$  Hz, 1H), 3.98 (s, 3H), 2.24 (d,  $J = 8.8$  Hz, 1H), 1.92 – 1.84 (m, 1H), 1.67 – 1.59 (m, 2H), 1.39 – 1.31 (m, 2H), 1.22 – 1.13 (m, 4H), 0.93 (q,  $J = 7.3$  Hz, 3H), 0.82 (t,  $J = 7.5$  Hz, 3H);  $^{19}F$  NMR (377 MHz,  $CDCl_3$ ):  $\delta$  -139.32 – -139.48 (m, 2F), -142.14 – -142.30 (m, 2F);  $^{13}C$  NMR (100 MHz,  $CDCl_3$ ):  $\delta$  160.21 – 160.04 (m), 146.00 – 143.31 (m), 145.79 – 143.19 (m), 125.64 (td,  $J = 15.0, 3.0$  Hz), 111.45 (td,  $J = 15.7, 15.3, 2.2$  Hz), 69.63, 69.38, 53.26, 44.75, 44.33, 28.44, 28.31, 28.07, 28.06, 23.11, 22.78, 22.06, 21.17, 14.02,

13.86, 10.44, 9.69; HRMS (EI): Calcd for C<sub>16</sub>H<sub>20</sub>O<sub>3</sub>F<sub>4</sub>Na [M+Na]<sup>+</sup> 359.1246, found 359.1248.

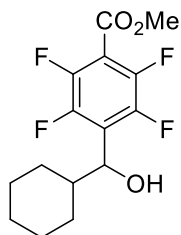

**Methyl 4-(cyclohexyl(hydroxy)methyl)-2,3,5,6-tetrafluorobenzoate (3ap):**

colorless oil (53 mg, 83%). <sup>1</sup>H NMR (400 MHz, CDCl<sub>3</sub>): δ 4.74 (t, *J* = 8.5 Hz, 1H), 3.98 (s, 3H), 2.23 (d, *J* = 8.5 Hz, 1H), 2.19 – 2.15 (m, 1H), 1.86 – 1.79 (m, 2H), 1.72 – 1.65 (m, 2H), 1.22 – 0.82 (m, 6H); <sup>19</sup>F NMR (377 MHz, CDCl<sub>3</sub>): δ -139.41 – -139.53 (m, 2F), -141.97 – -142.09 (m, 2F); <sup>13</sup>C NMR (100 MHz, CDCl<sub>3</sub>): δ 160.18 – 160.03 (m), 145.96 – 143.23 (m), 145.71 – 143.11 (m), 125.03 (t, *J* = 15.3 Hz), 111.48 (t, *J* = 15.6 Hz), 71.75, 53.25, 43.47 (t, *J* = 1.2 Hz), 29.58, 28.89, 26.08, 25.63, 25.52; HRMS (EI): Calcd for C<sub>15</sub>H<sub>16</sub>O<sub>3</sub>F<sub>4</sub>Na [M+Na]<sup>+</sup> 343.0933, found 343.0933.

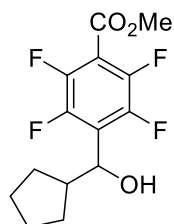

**Methyl 4-(cyclopentyl(hydroxy)methyl)-2,3,5,6-tetrafluorobenzoate (3aq):**

colorless oil (61 mg, 99%). <sup>1</sup>H NMR (400 MHz, CDCl<sub>3</sub>): δ 4.77 (dd, *J* = 9.4, 5.3 Hz, 1H), 3.98 (s, 3H), 2.50 – 2.42 (m, 1H), 2.27 (d, *J* = 8.0 Hz, 1H), 2.04 – 1.95 (m, 1H), 1.78 – 1.51 (m, 5H), 1.48 – 1.38 (m, 1H), 1.14 – 1.05 (m, 1H); <sup>19</sup>F NMR (377 MHz, CDCl<sub>3</sub>): δ -139.31 – -139.45 (m, 2F), -142.31 – -142.44 (m, 2F); <sup>13</sup>C NMR (100 MHz, CDCl<sub>3</sub>): δ 160.18 – 160.08 (m), 145.99 – 143.23 (m), 145.74 – 143.09 (m), 125.58 (t, *J* = 15.3 Hz), 111.50 (t, *J* = 15.8 Hz), 71.08, 53.26, 45.91 (t, *J* = 1.5 Hz), 30.27, 28.96, 25.24, 25.21; HRMS (EI): Calcd for C<sub>14</sub>H<sub>14</sub>O<sub>3</sub>F<sub>4</sub>Na [M+Na]<sup>+</sup> 329.0777, found 329.0780.

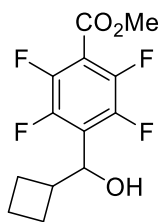

**Methyl 4-(cyclobutyl(hydroxy)methyl)-2,3,5,6-tetrafluorobenzoate (3ar):** colorless oil (46 mg, 78%).  $^1\text{H}$  NMR (400 MHz,  $\text{CDCl}_3$ ):  $\delta$  5.01 (dd,  $J = 7.8, 6.3$  Hz, 1H), 3.97 (s, 3H), 2.88 – 2.78 (m, 1H), 2.25 – 2.17 (m, 2H), 2.07 – 1.96 (m, 1H), 1.95 – 1.79 (m, 3H), 1.71 (q,  $J = 9.6, 9.2$  Hz, 1H);  $^{19}\text{F}$  NMR (377 MHz,  $\text{CDCl}_3$ ):  $\delta$  -139.35 – -139.47 (m, 2F), -142.53 – -142.67 (m, 2F);  $^{13}\text{C}$  NMR (100 MHz,  $\text{CDCl}_3$ ):  $\delta$  160.18 – 160.06 (m), 145.95 – 143.22 (m), 145.75 – 143.10 (m), 124.30 (t,  $J = 15.4$  Hz), 111.54 (t,  $J = 15.9$  Hz), 71.07, 53.27, 40.44 (t,  $J = 1.4$  Hz), 25.58, 23.72, 17.67; HRMS (EI): Calcd for  $\text{C}_{13}\text{H}_{13}\text{O}_3\text{F}_4$   $[\text{M}+\text{H}]^+$  293.0801, found 293.0796.

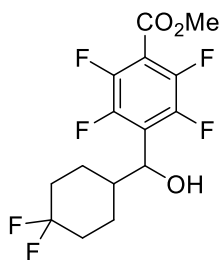

**Methyl 4-((4,4-difluorocyclohexyl)(hydroxy)methyl)-2,3,5,6-tetrafluorobenzoate (3as):** colorless oil (64 mg, 90%).  $^1\text{H}$  NMR (400 MHz,  $\text{CDCl}_3$ ):  $\delta$  4.81 (t,  $J = 8.6$  Hz, 1H), 3.99 (s, 3H), 2.35 (d,  $J = 8.2$  Hz, 1H), 2.28 (d,  $J = 13.4$  Hz, 1H), 2.24 – 2.14 (m, 1H), 2.12 – 2.05 (m, 1H), 1.96 (s, 1H), 1.83 – 1.62 (m, 2H), 1.52 – 1.41 (m, 1H), 1.39 – 1.32 (m, 2H);  $^{19}\text{F}$  NMR (377 MHz,  $\text{CDCl}_3$ ):  $\delta$  -92.60 (d,  $J = 236.6$  Hz, 1F), -102.41 (dt,  $J = 242.2, 36.6$  Hz, 1F), -138.76 – -138.89 (m, 2F), -141.81 – -141.94 (m, 2F);  $^{13}\text{C}$  NMR (100 MHz,  $\text{CDCl}_3$ ):  $\delta$  160.06 – 159.85 (m), 146.00 – 143.19 (m), 145.76 – 142.97 (m), 124.15 (t,  $J = 15.1$  Hz), 123.00 (t,  $J = 240.8$  Hz), 112.04 (t,  $J = 16.0$  Hz), 70.35, 53.38, 41.36 (d,  $J = 1.0$  Hz), 32.87 (ddd,  $J = 25.6, 23.3, 4.8$  Hz), 25.45 (dd,  $J = 60.0, 9.8$  Hz); HRMS (EI): Calcd for  $\text{C}_{15}\text{H}_{15}\text{O}_3\text{F}_6$   $[\text{M}+\text{H}]^+$  357.0925, found 357.0926.

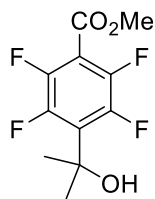

**Methyl 2,3,5,6-tetrafluoro-4-(2-hydroxypropan-2-yl)benzoate (3at):** colorless oil (41 mg, 78%). <sup>1</sup>H NMR (400 MHz, CDCl<sub>3</sub>): δ 3.97 (s, 3H), 2.75 (t, *J* = 3.9 Hz, 1H), 1.74 (t, *J* = 2.0 Hz, 6H); <sup>19</sup>F NMR (377 MHz, CDCl<sub>3</sub>): δ -139.33 – -139.45 (m, 2F), -139.63 – -139.77 (m, 2F); <sup>13</sup>C NMR (100 MHz, CDCl<sub>3</sub>): δ 160.11 – 160.01 (m), 146.57 – 143.68 (m), 145.90 – 142.94 (m), 129.33 (t, *J* = 12.3 Hz), 110.92 (t, *J* = 15.9 Hz), 73.52 (t, *J* = 2.1 Hz), 53.27, 30.55 (t, *J* = 4.0 Hz); HRMS (EI): Calcd for C<sub>11</sub>H<sub>10</sub>O<sub>3</sub>F<sub>4</sub>Na [M+Na]<sup>+</sup> 289.0464, found 289.0473.

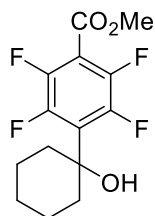

**Methyl 2,3,5,6-tetrafluoro-4-(1-hydroxycyclohexyl)benzoate (3au):** colorless oil (45 mg, 73%). <sup>1</sup>H NMR (400 MHz, CDCl<sub>3</sub>): δ 3.97 (s, 3H), 2.42 (t, *J* = 3.6 Hz, 1H), 2.06 (d, *J* = 5.0 Hz, 4H), 1.89 – 1.68 (m, 4H), 1.32 (tt, *J* = 13.1, 4.0 Hz, 2H); <sup>19</sup>F NMR (377 MHz, CDCl<sub>3</sub>): δ -139.18 – -139.26 (m, 2F), -139.36 – -139.49 (m, 2F); <sup>13</sup>C NMR (100 MHz, CDCl<sub>3</sub>): δ 160.17 – 160.03 (m), 146.63 – 143.70 (m), 146.16 – 143.37 (m), 129.79 (t, *J* = 11.3 Hz), 110.78 (t, *J* = 15.7 Hz), 75.62 – 75.51 (m), 53.21, 36.93 (t, *J* = 4.2 Hz), 25.10, 21.35; HRMS (EI): Calcd for C<sub>14</sub>H<sub>14</sub>O<sub>3</sub>F<sub>4</sub>Na [M+Na]<sup>+</sup> 329.0777, found 329.0780.

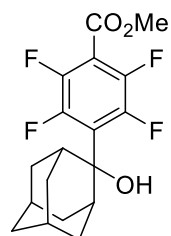

**Methyl 2,3,5,6-tetrafluoro-4-((1r,3r,5r,7r)-2-hydroxyadamantan-2-yl)benzoate (3av):** colorless oil (39 mg, 55%). <sup>1</sup>H NMR (400 MHz, CDCl<sub>3</sub>): δ 3.97 (s, 3H), 2.78 (s, 2H), 2.48 (s, 1H), 2.34 (d, *J* = 12.5 Hz, 2H), 1.92 (d, *J* = 12.2 Hz, 2H), 1.81 (q, *J* = 3.3



Hz, 2H), 1.76 (s, 2H), 1.70 – 1.65 (m, 4H);  $^{19}\text{F}$  NMR (377 MHz,  $\text{CDCl}_3$ ):  $\delta$  -136.45 (q,  $J = 9.4$  Hz, 2F), -139.12 – -139.24 (m, 2F);  $^{13}\text{C}$  NMR (100 MHz,  $\text{CDCl}_3$ ):  $\delta$  160.14 – 160.01 (m), 147.34 – 144.57 (m), 146.77 – 143.94 (m), 127.58 (t,  $J = 12.0$  Hz), 111.06 (t,  $J = 16.3$  Hz), 80.67 – 80.62 (m), 53.20, 46.96, 39.25, 37.19, 36.23 (t,  $J = 6.4$  Hz), 35.61 (t,  $J = 2.1$  Hz), 32.93, 27.45, 26.30, 26.16; HRMS (EI): Calcd for  $\text{C}_{18}\text{H}_{18}\text{O}_3\text{F}_4\text{Na}$   $[\text{M}+\text{Na}]^+$  381.1090, found 381.1093.

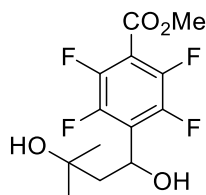

**Methyl 4-(1,3-dihydroxy-3-methylbutyl)-2,3,5,6-tetrafluorobenzoate (3aw):** The reaction was performed using 0.2 mmol of fluoroarenes and 0.3 mmol of alcohols; colorless oil (54 mg, 87%).  $^1\text{H}$  NMR (400 MHz,  $\text{CDCl}_3$ ):  $\delta$  5.53 (dd,  $J = 11.1, 2.7$  Hz, 1H), 4.05 (s, 1H), 3.97 (s, 3H), 2.37 (dd,  $J = 14.6, 11.0$  Hz, 1H), 2.08 (s, 1H), 1.69 (dd,  $J = 14.6, 2.5$  Hz, 1H), 1.44 (s, 3H), 1.35 (s, 3H);  $^{19}\text{F}$  NMR (377 MHz,  $\text{CDCl}_3$ ):  $\delta$  -139.47 – -139.59 (m, 2F), -142.55 – -142.67 (m, 2F);  $^{13}\text{C}$  NMR (100 MHz,  $\text{CDCl}_3$ ):  $\delta$  160.21 – 160.10 (m), 146.11 – 143.26 (m), 145.80 – 143.17 (m), 125.26 (t,  $J = 14.2$  Hz), 111.55 (t,  $J = 15.9$  Hz), 72.11, 64.10 (t,  $J = 2.0$  Hz), 53.26, 46.69, 31.93, 27.59; HRMS (EI): Calcd for  $\text{C}_{13}\text{H}_{14}\text{O}_4\text{F}_4\text{Na}$   $[\text{M}+\text{Na}]^+$  333.0726, found 333.0731.

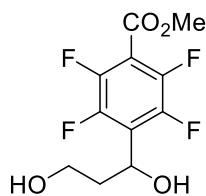

**Methyl 4-(1,3-dihydroxypropyl)-2,3,5,6-tetrafluorobenzoate (3ax):** The reaction was performed using 0.2 mmol of fluoroarenes and 0.3 mmol of alcohols; colorless oil (37 mg, 65%).  $^1\text{H}$  NMR (400 MHz,  $\text{CDCl}_3$ ):  $\delta$  5.38 (dd,  $J = 9.4, 3.9$  Hz, 1H), 3.97 (s, 3H), 3.96 – 3.84 (m, 2H), 3.46 (s, 1H), 2.36 – 2.25 (m, 1H), 2.01 – 1.93 (m, 1H), 1.80 (s, 1H);  $^{19}\text{F}$  NMR (377 MHz,  $\text{CDCl}_3$ ):  $\delta$  -139.31 – -139.43 (m, 2F), -142.79 – -142.91 (m, 2F);  $^{13}\text{C}$  NMR (100 MHz,  $\text{CDCl}_3$ ):  $\delta$  160.21 – 160.09 (m), 146.02 – 143.23 (m), 145.77 – 143.09 (m), 125.05 (t,  $J = 14.8$  Hz), 111.61 (t,  $J = 15.9$  Hz), 65.42 (t,  $J = 1.9$

Hz), 60.58, 53.30, 37.73 (t,  $J = 1.6$  Hz); HRMS (EI): Calcd for  $C_{11}H_{11}O_4F_4$   $[M+H]^+$  283.0593, found 283.0592.

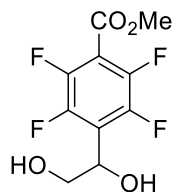

**Methyl 4-(1,2-dihydroxyethyl)-2,3,5,6-tetrafluorobenzoate (3ay):** white solid (28 mg, 53%); Mp. 85 – 86 °C.  $^1H$  NMR (400 MHz,  $CD_3OD$ ):  $\delta$  5.10 (t,  $J = 6.8$  Hz, 1H), 3.93 (s, 3H), 3.88 (dd,  $J = 11.1, 7.0$  Hz, 1H), 3.75 (dd,  $J = 11.0, 6.9$  Hz, 1H);  $^{19}F$  NMR (377 MHz,  $CD_3OD$ ):  $\delta$  -142.84 – -142.96 (m, 2F), -144.00 – -144.12 (m, 2F);  $^{13}C$  NMR (100 MHz,  $CD_3OD$ ):  $\delta$  161.35 – 161.25 (m), 147.79 – 145.07 (m), 147.16 – 144.38 (m), 125.38 (t,  $J = 15.5$  Hz), 112.96 (t,  $J = 16.4$  Hz), 67.96 (t,  $J = 1.8$  Hz), 65.17 (t,  $J = 2.5$  Hz), 53.76; HRMS (EI): Calcd for  $C_{10}H_8O_4F_4Na$   $[M+Na]^+$  291.0256, found 291.0249.

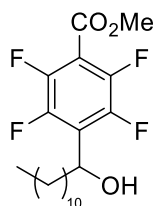

**Methyl 2,3,5,6-tetrafluoro-4-(1-hydroxydodecyl)benzoate (3az):** The reaction was performed using 0.2 mmol of fluoroarenes and 0.3 mmol of alcohols; colorless oil (78 mg, 99%).  $^1H$  NMR (400 MHz,  $CDCl_3$ ):  $\delta$  5.07 (q,  $J = 7.3$  Hz, 1H), 3.98 (s, 3H), 2.23 (d,  $J = 8.1$  Hz, 1H), 2.06 – 1.95 (m, 1H), 1.88 – 1.78 (m, 1H), 1.49 – 1.40 (m, 1H), 1.37 – 1.18 (m, 17H), 0.87 (t,  $J = 6.8$  Hz, 3H);  $^{19}F$  NMR (377 MHz,  $CDCl_3$ ):  $\delta$  -139.28 – -139.40 (m, 2F), -143.18 – -143.32 (m, 2F);  $^{13}C$  NMR (100 MHz,  $CDCl_3$ ):  $\delta$  160.17 – 160.06 (m), 146.00 – 143.19 (m), 145.75 – 143.02 (m), 125.71 (t,  $J = 15.0$  Hz), 111.48 (t,  $J = 15.8$  Hz), 66.88 (t,  $J = 1.6$  Hz), 53.27, 36.90, 31.88, 29.57, 29.48, 29.39, 29.31, 29.16, 25.69, 22.66, 14.08; HRMS (EI): Calcd for  $C_{20}H_{28}O_3F_4Na$   $[M+Na]^+$  415.1872, found 415.1873.

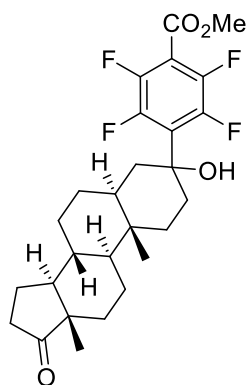

**Methyl 2,3,5,6-tetrafluoro-4-((5S,8R,9S,10S,13S,14S)-3-hydroxy-10,13-dimethyl-17-oxohexadecahydro-1H-cyclopenta[a]phenanthren-3-yl)benzoate (4):** white solid (92 mg, 93%); Mp. 152 – 153 °C. <sup>1</sup>H NMR (400 MHz, CDCl<sub>3</sub>): δ 3.96 (s, 3H), 2.47 – 2.39 (m, 2H), 2.38 – 2.30 (m, 1H), 2.28 – 2.20 (m, 1H), 2.13 – 2.00 (m, 2H), 1.97 – 1.89 (m, 2H), 1.86 – 1.75 (m, 4H), 1.74 – 1.65 (m, 2H), 1.63 – 1.47 (m, 4H), 1.34 – 1.27 (m, 3H), 1.10 – 0.95 (m, 2H), 0.90 (s, 3H), 0.86 (s, 3H); <sup>19</sup>F NMR (377 MHz, CDCl<sub>3</sub>): δ -139.27 – -139.40 (m, 2F), -139.55 – -139.69 (m, 2F); <sup>13</sup>C NMR (100 MHz, CDCl<sub>3</sub>): δ 211.70, 160.10 – 159.97 (m), 146.59 – 143.70 (m), 146.10 – 143.14 (m), 129.64 (t, *J* = 11.2 Hz), 110.70 (t, *J* = 15.6 Hz), 75.84, 54.05, 53.22, 51.39, 47.78, 40.30, 39.38 (t, *J* = 4.0 Hz), 35.79, 35.62, 34.99, 33.36, 32.89 (t, *J* = 4.0 Hz), 31.48, 30.74, 27.83, 21.70, 20.15, 13.79, 11.42; HRMS (EI): Calcd for C<sub>27</sub>H<sub>32</sub>O<sub>4</sub>F<sub>4</sub>Na [M+Na]<sup>+</sup> 519.2134, found 519.2138.

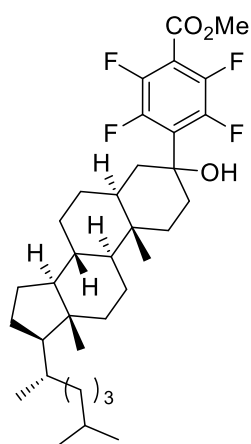

**Methyl 2,3,5,6-tetrafluoro-4-((5S,8R,9S,10S,13R,14S,17R)-3-hydroxy-10,13-dimethyl-17-((S)-6-methylheptan-2-yl)hexadecahydro-1H-cyclopenta[a]phenanthren-3-yl)benzoate (5):** white solid (63 mg, 53%); Mp. 129 –

130 °C. <sup>1</sup>H NMR (400 MHz, CDCl<sub>3</sub>): δ 3.97 (s, 3H), 2.35 (s, 1H), 2.23 (dd, *J* = 13.9, 4.5 Hz, 1H), 2.12 – 1.88 (m, 4H), 1.85 – 1.65 (m, 4H), 1.63 – 1.47 (m, 6H), 1.40 – 1.29 (m, 6H), 1.17 – 1.06 (m, 6H), 1.05 – 0.96 (m, 4H), 0.90 (d, *J* = 6.5 Hz, 3H), 0.87 (s, 3H), 0.87 (s, 3H), 0.85 (d, *J* = 1.9 Hz, 3H), 0.66 (s, 3H); <sup>19</sup>F NMR (377 MHz, CDCl<sub>3</sub>): δ -139.34 – -139.46 (m, 2F), -139.56 – -139.64 (m, 2F); <sup>13</sup>C NMR (100 MHz, CDCl<sub>3</sub>): δ 160.15 – 160.04 (m), 146.61 – 143.74 (m), 146.09 – 143.28 (m), 129.81 (t, *J* = 11.0 Hz), 110.65 (t, *J* = 15.5 Hz), 76.07 (m), 56.47, 56.24, 53.97, 53.22, 42.60, 40.37, 39.97, 39.58 (t, *J* = 3.9 Hz), 39.50, 36.16, 35.79, 35.47, 33.43, 32.95 (t, *J* = 4.0 Hz), 31.94, 28.22, 28.20, 28.00, 24.16, 23.82, 22.81, 22.68 (t, *J* = 3.1 Hz), 22.55, 20.91, 18.66, 12.08, 11.45; HRMS (EI): Calcd for C<sub>35</sub>H<sub>50</sub>O<sub>3</sub>F<sub>4</sub>Na [M+Na]<sup>+</sup> 617.3594, found 617.3602.

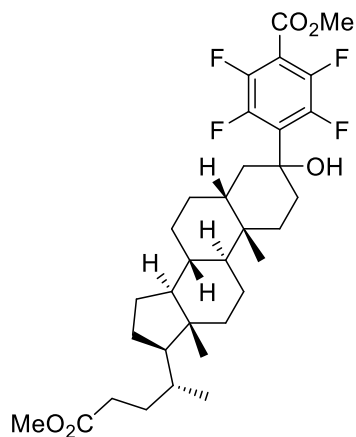

**Methyl 2,3,5,6-tetrafluoro-4-((5R,8R,9S,10S,13R,14S,17R)-3-hydroxy-17-((R)-5-methoxy-5-oxopentan-2-yl)-10,13-dimethylhexadecahydro-1H-**

**cyclopenta[a]phenanthren-3-yl)benzoate (6):** The reaction was performed using 0.6 mmol of fluoroarenes and 0.2 mmol of alcohols; white solid (88 mg, 74%); Mp. 99 – 100 °C. <sup>1</sup>H NMR (400 MHz, CDCl<sub>3</sub>): δ 3.95 (s, 3H), 3.64 (s, 3H), 2.54 (s, 1H), 2.46 (t, *J* = 13.3 Hz, 1H), 2.37 – 2.29 (m, 1H), 2.24 – 2.10 (m, 2H), 2.03 – 1.72 (m, 7H), 1.68 – 1.51 (m, 4H), 1.46 – 1.35 (m, 5H), 1.35 – 1.27 (m, 2H), 1.22 – 1.14 (m, 3H), 1.12 – 1.02 (m, 3H), 0.98 (s, 3H), 0.90 (d, *J* = 6.4 Hz, 3H), 0.64 (s, 3H); <sup>19</sup>F NMR (377 MHz, CDCl<sub>3</sub>): δ -139.22 – -139.53 (m, 4F); <sup>13</sup>C NMR (100 MHz, CDCl<sub>3</sub>): δ 174.73, 160.09 – 159.97 (m), 146.57 – 143.69 (m), 146.08 – 143.30 (m), 129.90 (t, *J* = 10.7 Hz), 110.60 (t, *J* = 15.5 Hz), 76.42, 56.48, 55.83, 53.15, 51.40, 42.69, 40.09, 39.94, 37.89, 37.44 (t,

$J = 3.6$  Hz), 35.56, 35.28, 34.40, 31.62 (t,  $J = 4.3$  Hz), 31.08, 30.96, 30.93, 28.09, 26.46, 26.31, 24.08, 23.44, 21.04, 18.20, 12.01; HRMS (EI): Calcd for  $C_{33}H_{45}O_5F_4$   $[M+H]^+$  597.3203, found 597.3199.

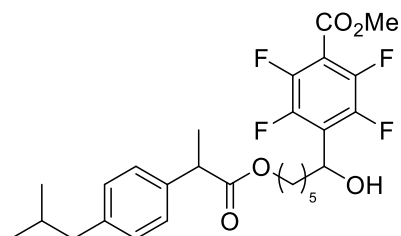

**Methyl 2,3,5,6-tetrafluoro-4-(1-hydroxy-6-((2-(4-isobutylphenyl)propanoyl)oxy)hexyl)benzoate (7):** The reaction was performed using 0.6 mmol of fluoroarenes and 0.2 mmol of alcohols; colorless oil (73 mg, 71%).  $^1H$  NMR (400 MHz,  $CDCl_3$ ):  $\delta$  7.18 (d,  $J = 8.1$  Hz, 2H), 7.08 (d,  $J = 8.1$  Hz, 2H), 5.03 (t,  $J = 7.3$  Hz, 1H), 4.04 (t,  $J = 6.3$  Hz, 2H), 3.98 (s, 3H), 3.67 (q,  $J = 7.2$  Hz, 1H), 2.43 (d,  $J = 7.2$  Hz, 2H), 2.01 – 1.90 (m, 1H), 1.88 – 1.71 (m, 2H), 1.68 (s, 1H), 1.57 (p,  $J = 6.7$  Hz, 2H), 1.47 (d,  $J = 7.2$  Hz, 3H), 1.33 – 1.17 (m, 4H), 0.88 (d,  $J = 6.6$  Hz, 6H);  $^{19}F$  NMR (377 MHz,  $CDCl_3$ ):  $\delta$  -139.24 – -139.36 (m, 2F), -143.12 – -143.24 (m, 2F);  $^{13}C$  NMR (100 MHz,  $CDCl_3$ )  $\delta$  174.84, 160.13 – 160.01 (m), 146.00 – 143.19 (m), 145.71 – 142.97 (m), 140.47, 137.78, 129.23, 127.10, 125.57 (t,  $J = 15.0$  Hz), 111.51 (t,  $J = 15.9$  Hz), 66.55, 64.33, 53.27, 45.14, 44.96, 36.57, 30.13, 28.31, 25.33 (d,  $J = 1.5$  Hz), 25.25, 22.30, 18.35; HRMS (EI): Calcd for  $C_{27}H_{33}O_5F_4$   $[M+H]^+$  513.5416, found 513.5420.

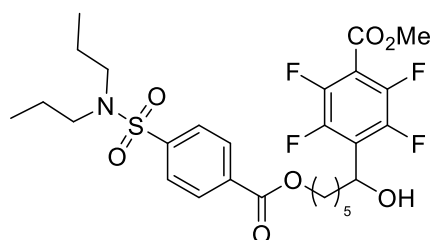

**Methyl 4-(6-((4-(N,N-dipropylsulfamoyl)benzoyl)oxy)-1-hydroxyhexyl)-2,3,5,6-tetrafluorobenzoate (8):** The reaction was performed using 0.6 mmol of fluoroarenes and 0.2 mmol of alcohols; colorless oil (73 mg, 62%).  $^1H$  NMR (400 MHz,  $CDCl_3$ ):  $\delta$  8.13 (d,  $J = 8.5$  Hz, 2H), 7.86 (d,  $J = 8.5$  Hz, 2H), 5.09 (t,  $J = 7.2$  Hz, 1H), 4.34 (t,  $J = 6.5$  Hz, 2H), 3.97 (s, 3H), 3.09 (t,  $J = 7.6$  Hz, 4H), 2.45 (s, 1H), 2.10 – 2.01 (m, 1H),

1.91 – 1.83 (m, 1H), 1.79 (p,  $J = 6.8$  Hz, 2H), 1.59 – 1.46 (m, 7H), 1.41 – 1.32 (m, 1H), 0.86 (t,  $J = 7.4$  Hz, 6H);  $^{19}\text{F}$  NMR (377 MHz,  $\text{CDCl}_3$ ):  $\delta$  -139.20 – -139.32 (m, 2F), -143.14 – -143.26 (m, 2F);  $^{13}\text{C}$  NMR (100 MHz,  $\text{CDCl}_3$ ):  $\delta$  165.28, 160.10 – 159.97 (m), 146.01 – 143.20 (m), 144.22, 145.70 – 142.99 (m), 133.62, 130.13, 126.97, 125.48 (t,  $J = 15.0$  Hz), 111.61 (t,  $J = 15.9$  Hz), 66.56 (t,  $J = 1.7$  Hz), 65.38, 53.28, 49.92, 36.60 (t,  $J = 1.6$  Hz), 28.49, 25.64, 25.41, 21.90, 11.10; HRMS (EI): Calcd for  $\text{C}_{27}\text{H}_{34}\text{F}_4\text{NO}_7\text{S}$   $[\text{M}+\text{H}]^+$  592.6146, found 592.6150.

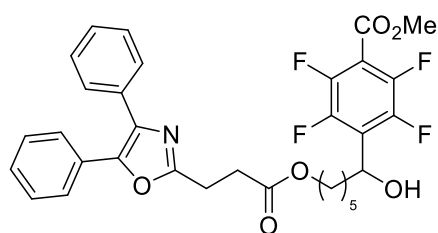

**Methyl 4-(6-((3-(4,5-diphenyloxazol-2-yl)propanoyl)oxy)-1-hydroxyhexyl)-2,3,5,6-tetrafluorobenzoate (9):** The reaction was performed using 0.6 mmol of fluoroarenes and 0.2 mmol of alcohols; colorless oil (85 mg, 71%).  $^1\text{H}$  NMR (400 MHz,  $\text{CDCl}_3$ ):  $\delta$  7.61 (dd,  $J = 8.0, 1.7$  Hz, 2H), 7.56 (dd,  $J = 8.0, 1.7$  Hz, 2H), 7.37 – 7.28 (m, 6H), 5.02 (dd,  $J = 8.1, 6.3$  Hz, 1H), 4.12 (t,  $J = 6.5$  Hz, 2H), 3.97 (s, 3H), 3.18 (t,  $J = 7.4$  Hz, 2H), 2.91 (t,  $J = 7.4$  Hz, 2H), 2.40 (s, 1H), 2.01 – 1.92 (m, 1H), 1.80 – 1.71 (m, 1H), 1.63 (p,  $J = 6.6$  Hz, 2H), 1.53 – 1.43 (m, 1H), 1.39 (p,  $J = 7.2$  Hz, 2H), 1.34 – 1.28 (m, 1H);  $^{19}\text{F}$  NMR (377 MHz,  $\text{CDCl}_3$ ):  $\delta$  -139.26 – -139.38 (m, 2F), -143.10 – -143.23 (m, 2F);  $^{13}\text{C}$  NMR (100 MHz,  $\text{CDCl}_3$ ):  $\delta$  172.00, 161.81, 160.13 – 160.02 (m), 145.43, 146.02 – 143.16 (m), 145.74 – 142.89 (m), 135.07, 132.36, 128.93, 128.62, 128.51, 128.46, 128.07, 127.88, 126.44, 125.58 (t,  $J = 15.1$  Hz), 111.62 (t,  $J = 15.8$  Hz), 66.52 (t,  $J = 1.5$  Hz), 64.60, 53.26, 36.60 (t,  $J = 1.5$  Hz), 31.15, 28.39, 25.52, 25.37, 23.56; HRMS (EI): Calcd for  $\text{C}_{32}\text{H}_{29}\text{F}_4\text{NO}_6$   $[\text{M}+\text{H}]^+$  600.5786, found 600.5791.

## 6. Gram-Scale Preparation of 3aa and Transformations of the Products

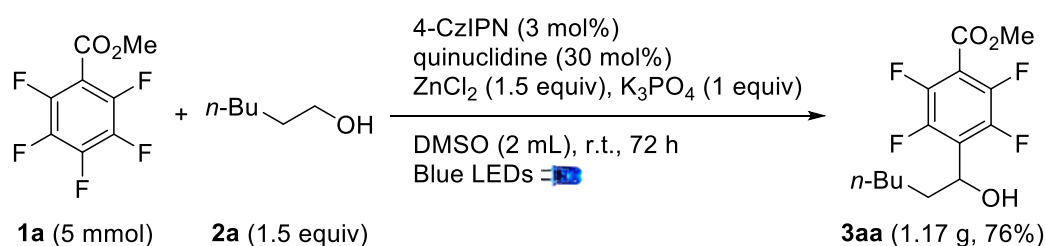

In a 100 mL Schlenk tube with a magnetic stir bar were placed 4-CzIPN (**PC**, 118.3 mg, 0.15 mmol), quinuclidine (166.8 mg, 1.5 mmol),  $K_3PO_4$  (1.06 g, 5 mmol) and  $ZnCl_2$  (1.02 g, 7.5 mmol). Under nitrogen atmosphere, methyl pentafluorobenzoate (**1a**, 1.13 g, 5 mmol), hexanol (**2a**, 0.77g, 7.5 mmol), DMSO (40 mL) were added, subsequently. The resulting mixture was sealed and degassed *via* freeze-pump-thaw for three times. Then, the reaction was placed under a blue LED (2-meter strips, 18 W, 456 nm) and irradiated for 72 hrs at rt. The resulting mixture was quenched with  $H_2O$  and extracted with ether (20 mL  $\times$  3). The combined organic layer was washed with brine, dried over  $MgSO_4$  and concentrated in vacuo. The residue was purified by column chromatography. Silica gel chromatography (eluent: petroleum ether/EtOAc = 5/1) of the crude product afforded the desired compound as a colorless oil (1.17 g).

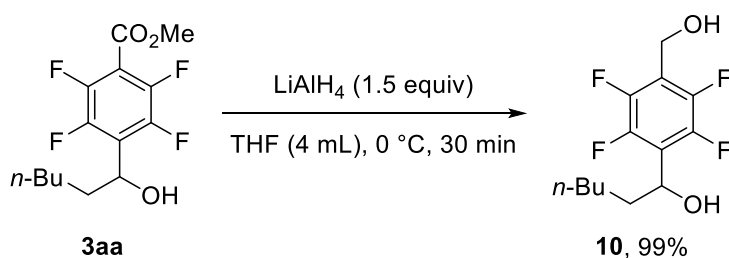

**1-(2,3,5,6-Tetrafluoro-4-(hydroxymethyl)phenyl)hexan-1-ol (10):** Under nitrogen atmosphere, **3aa** (44  $\mu$ L, 0.2 mmol), THF (4 mL) and lithium aluminum hydride solution (0.3 mL, 1 M in THF) were added in a 10 mL Schlenk tube with a magnetic stir bar at 0  $^\circ$ C. Subsequently. The resulting mixture was sealed and cooled to 0  $^\circ$ C for 30 mins. The solvent was removed under vacuum. Silica gel chromatography (eluent: petroleum ether/EtOAc = 2/1) of the crude product afforded the desired compounds as a colorless oil (55 mg, 99%).  $^1H$  NMR (400 MHz,  $CDCl_3$ ):  $\delta$  5.03 (t,  $J$  = 7.4 Hz, 1H), 4.77 (s, 2H), 2.62 (s, 2H), 2.04 – 1.92 (m, 1H), 1.88 – 1.76 (m, 1H), 1.48 – 1.37 (m, 1H), 1.34 – 1.26 (m, 5H), 0.88 (t,  $J$  = 6.8 Hz, 3H);  $^{19}F$  NMR (377 MHz,  $CDCl_3$ ):  $\delta$  -144.73 (dd,  $J$  = 22.1, 13.0 Hz, 2F), -145.23 (dd,  $J$  = 22.0, 13.0 Hz, 2F);  $^{13}C$  NMR (100 MHz,  $CDCl_3$ ):  $\delta$  146.21 – 143.46 (m), 145.52 – 142.87 (m), 122.28 (t,  $J$  = 15.0 Hz), 117.51 (t,  $J$  = 17.7 Hz), 66.71 (t,  $J$  = 2.1 Hz), 52.68 – 52.59 (m), 36.78, 31.34, 25.41, 22.43, 13.89; HRMS (EI): Calcd for  $C_{13}H_{17}F_4O_2$   $[M+H]^+$  281.2626, found 281.2629.

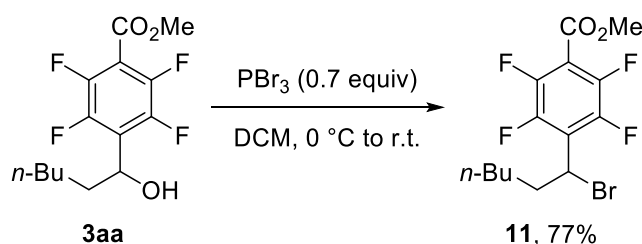

**Methyl 4-(1-bromohexyl)-2,3,5,6-tetrafluorobenzoate (11):** In a 10 mL Schlenk tube with a magnetic stir bar were placed **3aa** (44  $\mu\text{L}$ , 0.2 mmol) and  $\text{CH}_2\text{Cl}_2$  (1 mL). Under nitrogen atmosphere, added  $\text{PBr}_3$  (14  $\mu\text{L}$ , 0.14 mmol) at 0  $^\circ\text{C}$ . After completion of reaction (monitored by TLC), the mixture was quenched by water and extracted with  $\text{CH}_2\text{Cl}_2$  three times. The combined organic layer was washed by brine, dried over  $\text{MgSO}_4$  and concentrated in vacuo. Silica gel chromatography (eluent: petroleum ether/EtOAc = 5/1) of the crude product afforded the desired compounds as a colorless oil (57 mg, 77%).  $^1\text{H}$  NMR (400 MHz,  $\text{CDCl}_3$ ):  $\delta$  5.19 (t,  $J = 7.9$  Hz, 1H), 3.99 (s, 3H), 2.42 – 2.32 (m, 1H), 2.28 – 2.19 (m, 1H), 1.51 – 1.44 (m, 1H), 1.36 – 1.28 (m, 5H), 0.88 (t,  $J = 6.9$  Hz, 3H);  $^{19}\text{F}$  NMR (377 MHz,  $\text{CDCl}_3$ ):  $\delta$  -138.82 – -138.96 (m, 2F), -139.91 (s, 2F);  $^{13}\text{C}$  NMR (100 MHz,  $\text{CDCl}_3$ ):  $\delta$  159.92 – 159.82 (m), 146.05 – 143.25 (m), 145.79 – 143.06 (m), 123.73 (t,  $J = 14.2$  Hz), 112.27 (t,  $J = 16.0$  Hz), 53.37, 38.85 (t,  $J = 1.7$  Hz), 36.93 (t,  $J = 2.8$  Hz), 30.81, 27.93, 22.33, 13.87; HRMS (EI): Calcd for  $\text{C}_{14}\text{H}_{16}\text{O}_2\text{F}_4\text{Br}$   $[\text{M}+\text{H}]^+$  371.0270, found 371.0261.

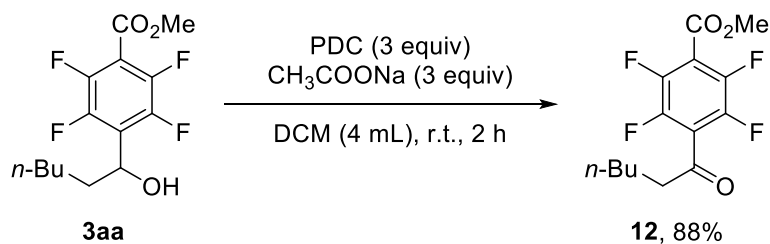

**Methyl 2,3,5,6-tetrafluoro-4-hexanoylbenzoate (12):** In a 10 mL Schlenk tube with a magnetic stir bar were placed sodium acetate (49.2 mg, 0.6 mmol), pyridinium dichromate (225.7 mg, 0.6 mmol). Under nitrogen atmosphere,  $\text{CH}_2\text{Cl}_2$  (4 mL) and **3aa** (44  $\mu\text{L}$ , 0.2 mmol) were added at room temperature. After stirred for 2 hrs, the mixture was quenched by water and extracted with  $\text{CH}_2\text{Cl}_2$  (5 mL  $\times$  3). The combined organic layer was washed by brine, dried over  $\text{MgSO}_4$  and concentrated in vacuo. Silica gel chromatography (eluent: petroleum ether/EtOAc = 5/1) of the crude product afforded



the desired compounds as a colorless oil (54 mg, 88%).  $^1\text{H}$  NMR (400 MHz,  $\text{CDCl}_3$ ):  $\delta$  3.99 (s, 3H), 2.85 (t,  $J = 7.3$  Hz, 2H), 1.74 – 1.67 (m, 2H), 1.37 – 1.29 (m, 4H), 0.89 (t,  $J = 6.8$  Hz, 3H);  $^{19}\text{F}$  NMR (377 MHz,  $\text{CDCl}_3$ ):  $\delta$  -137.72 – -137.85 (m, 2F), -141.13 – -141.27 (m, 2F);  $^{13}\text{C}$  NMR (100 MHz,  $\text{CDCl}_3$ ):  $\delta$  194.68 – 194.59 (m), 159.57 – 159.45 (m), 145.93 – 143.03 (m), 144.55 – 141.70 (m), 122.47 (t,  $J = 19.3$  Hz), 114.15 (t,  $J = 16.4$  Hz), 53.50, 44.98, 31.01, 23.03, 22.30, 13.78; HRMS (EI): Calcd for  $\text{C}_{14}\text{H}_{14}\text{O}_3\text{F}_4\text{Na}$   $[\text{M}+\text{Na}]^+$  329.0777, found 329.0776.

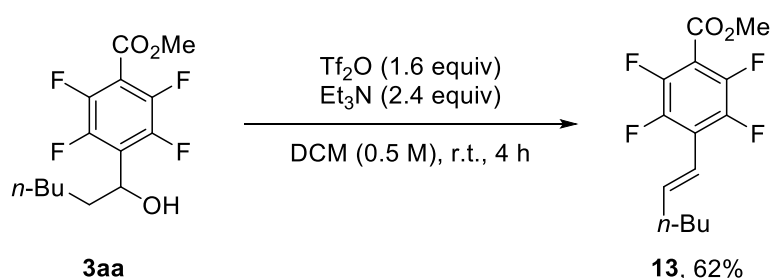

**Methyl (*E*)-2,3,5,6-tetrafluoro-4-(hex-1-en-1-yl)benzoate (13):** In a 10 mL Schlenk tube with a magnetic stir bar were placed **3aa** (44  $\mu\text{L}$ , 0.2 mmol),  $\text{Et}_3\text{N}$  (67  $\mu\text{L}$ , 0.48 mmol) and  $\text{CH}_2\text{Cl}_2$  (2 mL). Then, dropwise added trifluoromethanesulfonic anhydride (54  $\mu\text{L}$ , 0.32 mmol) at 0  $^\circ\text{C}$ . After stirring for 4 h, the reaction was quenched by adding water, and the mixture was extracted with  $\text{CH}_2\text{Cl}_2$  three times. The combined organic layer were washed with brine, dried ( $\text{MgSO}_4$ ), and concentrated in vacuo. Silica gel chromatography (eluent: petroleum ether/ $\text{EtOAc} = 10/1$ ) of the crude product afforded the desired compounds as a colorless oil (36 mg, 62%).  $^1\text{H}$  NMR (400 MHz,  $\text{CDCl}_3$ ):  $\delta$  6.72 (dt,  $J = 16.2, 7.0$  Hz, 1H), 6.36 (dt,  $J = 16.4, 1.6$  Hz, 1H), 3.96 (s, 3H), 2.30 (q,  $J = 7.9$  Hz, 2H), 1.52 – 1.45 (m, 2H), 1.43 – 1.33 (m, 2H), 0.93 (t,  $J = 7.2$  Hz, 3H);  $^{19}\text{F}$  NMR (377 MHz,  $\text{CDCl}_3$ ):  $\delta$  -140.76 – -140.88 (m, 2F), -143.25 – -143.37 (m, 2F);  $^{13}\text{C}$  NMR (100 MHz,  $\text{CDCl}_3$ ):  $\delta$  160.47 – 160.35 (m), 146.32 – 143.46 (m), 143.86 (t,  $J = 7.8$  Hz), 145.60 – 142.80 (m), 120.35 (t,  $J = 13.6$  Hz), 114.79 (t,  $J = 2.9$  Hz), 109.21 (t,  $J = 15.6$  Hz), 53.06, 34.15, 30.84, 22.22, 13.83; HRMS (EI): Calcd for  $\text{C}_{14}\text{H}_{14}\text{O}_2\text{F}_4\text{Na}$   $[\text{M}+\text{Na}]^+$  313.0828, found 313.0834.

## 7. Additional Experiments to Elucidate the Mechanism

### 7.1 Radical Inhibition Experiments

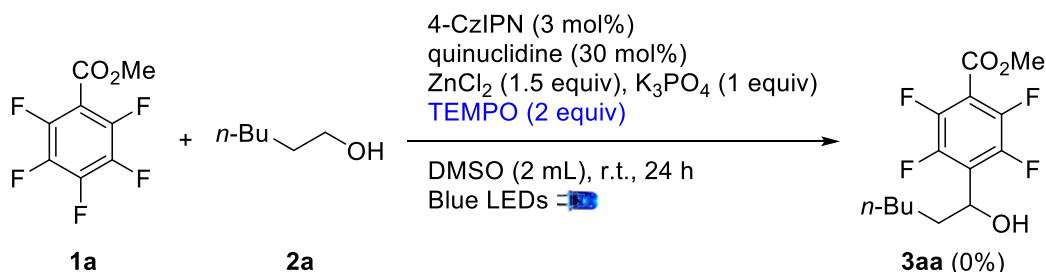

The radical initiator, TEMPO, can totally inhibit the formation of product, **3aa**, thus supporting a radical-based mechanism.

### 7.2 Evidence for the Presence of Carbon Radical

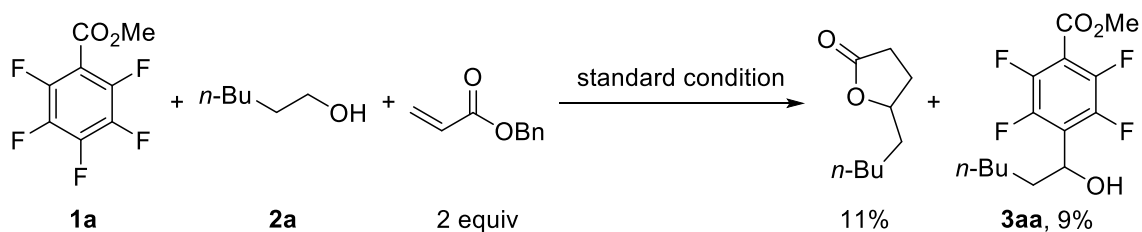

In a 10 mL Schlenk tube with a magnetic stir bar were placed 4-CzIPN (**PC**, 2.4 mg, 0.003 mmol), quinuclidine (3.3 mg, 0.03 mmol), K<sub>3</sub>PO<sub>4</sub> (21.2 mg, 0.1 mmol) and ZnCl<sub>2</sub> (20.5 mg, 0.15 mmol). Under nitrogen atmosphere, methyl pentafluorobenzoate (**1a**, 0.1 mmol), hexanol (**2a**, 0.15 mmol), benzyl acrylate (0.2 mmol), DMSO (2 mL) were added, subsequently. The mixture was degassed *via* freeze-pump-thaw for three times, and irradiated under a blue LED (2-meter strips, 18 W, 456 nm) for 24 hrs at rt. The resulting mixture was quenched with H<sub>2</sub>O (2 mL) and extracted with Et<sub>2</sub>O (2 mL × 3). The combined organic layer was washed with saturated brine, dried over MgSO<sub>4</sub> and concentrated in vacuo. The yields of **3aa** and 5-pentyldihydrofuran-2(3*H*)-one were determined by <sup>1</sup>H NMR and <sup>19</sup>F NMR of the crude products using trifluorotoluene (0.033 mmol) as an internal standard.<sup>1</sup>

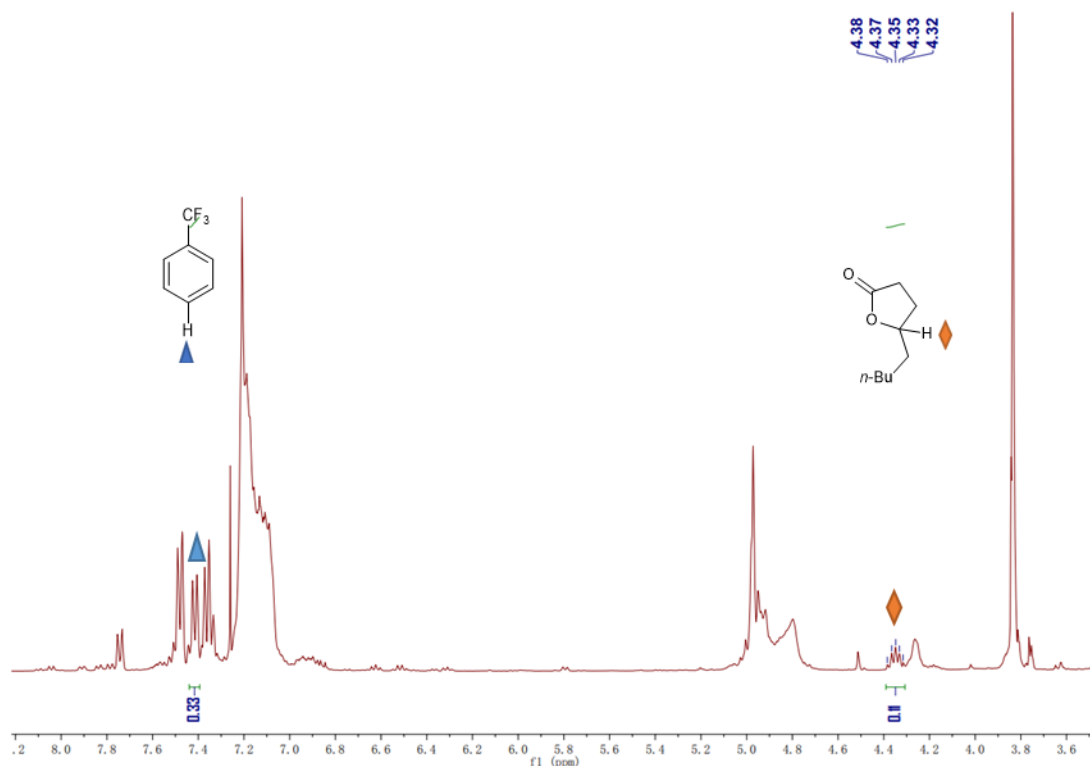

### 7.3 Evidence for the Presence of Polyfluorophenyl Radical

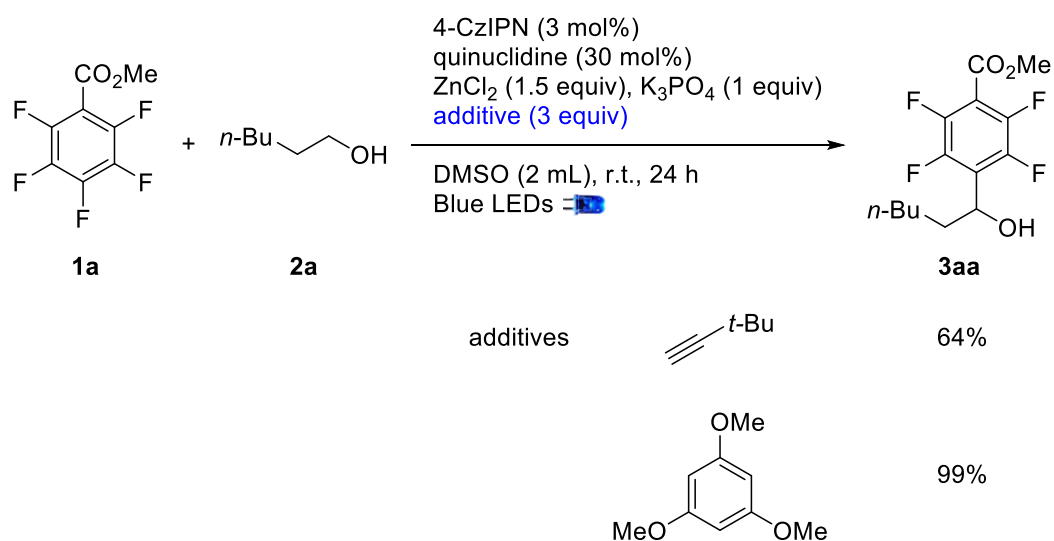

When adding the radical trappers for polyfluoroaryl radicals, such as alkynes and trimethoxybenzene, no radical addition products was observed with no significant influence on the yields of alkylpolyfluoroarenes.

### 7.4 Stern-Volmer Quenching Experiments

In a typical experiment, a solution of 4-CzIPN in anhydrous reaction solvent (DMSO)

( $1.0 \times 10^{-5}$  M) was added with an appropriate amount of quencher in a quartz cuvette. Then the emission of the sample was collected. The emission intensity was collected with excited wavelength of photocatalysts, respectively.

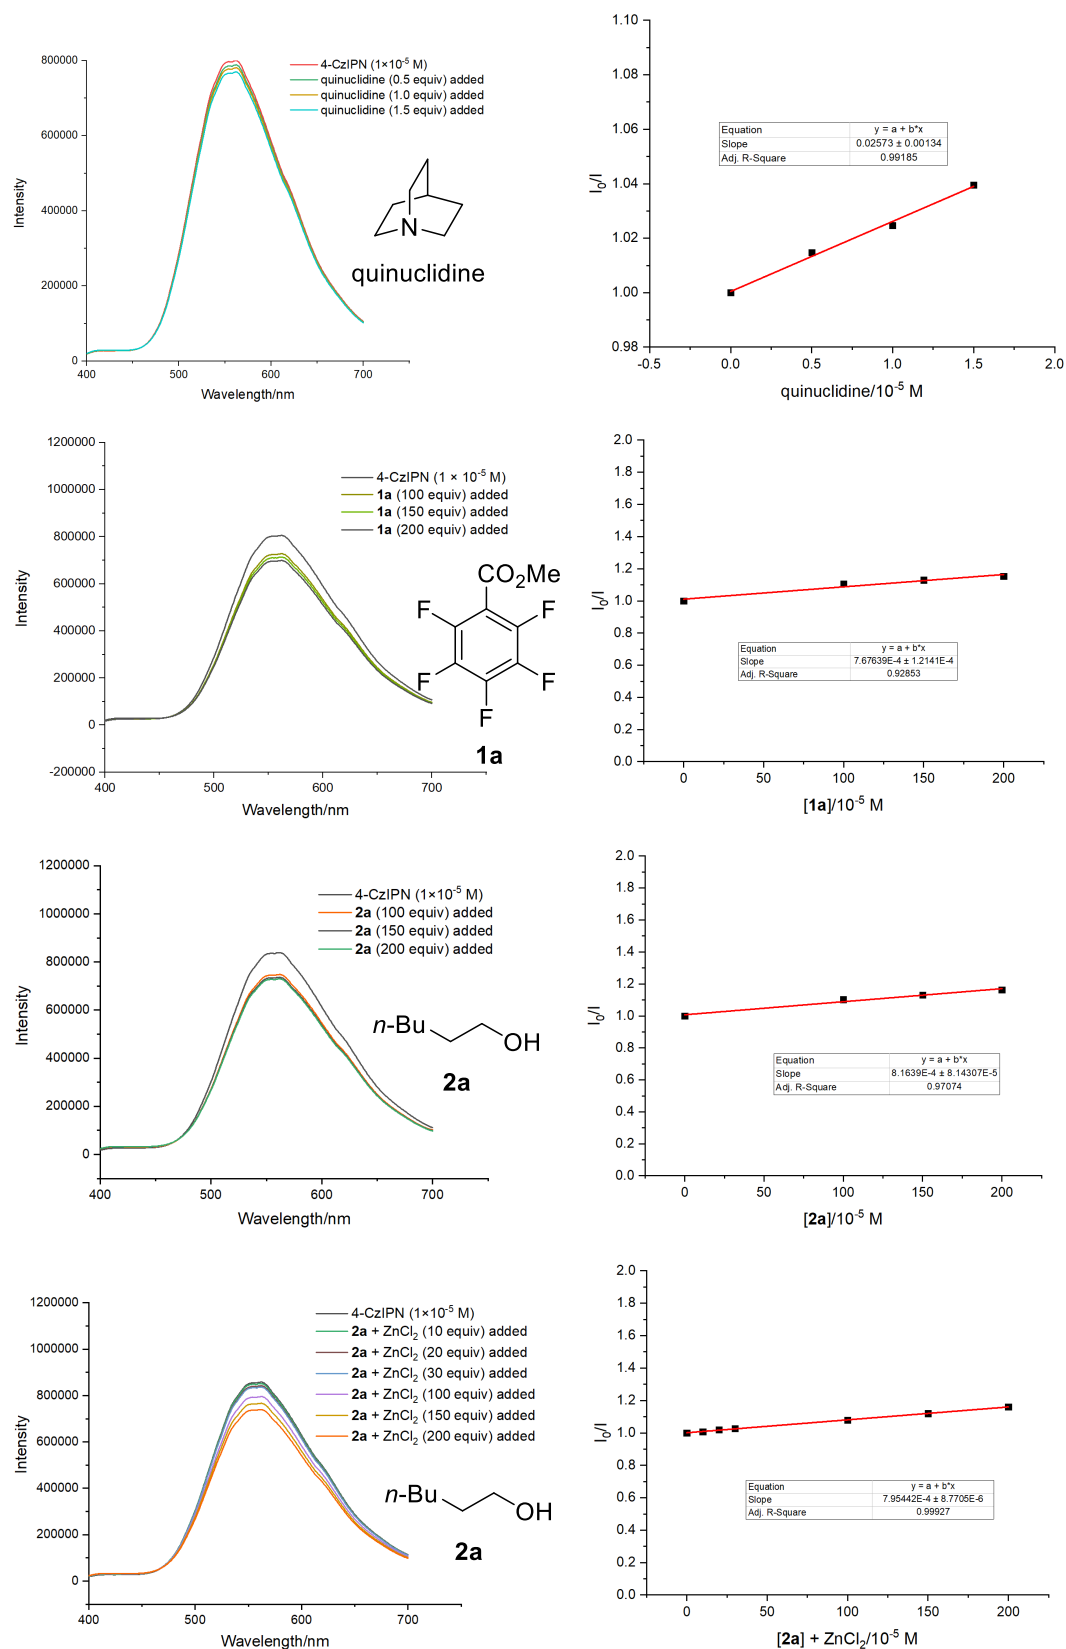

## 7.5 Defluoroalkylation of Pentafluorochlorobenzene

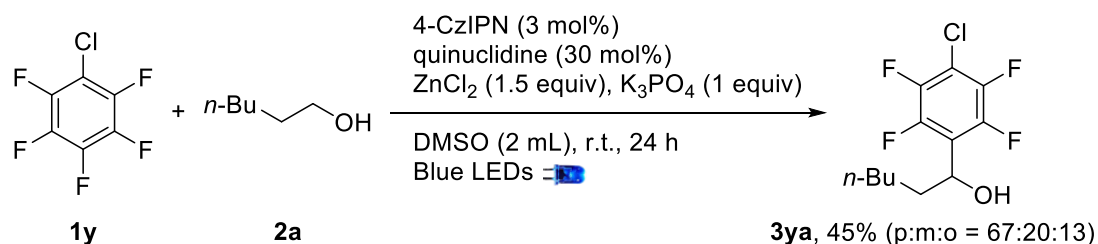

In a 10 mL Schlenk tube with a magnetic stir bar were placed 4-CzIPN (**PC**, 4.8 mg, 0.006 mmol), quinuclidine (6.6 mg, 0.06 mmol),  $\text{K}_3\text{PO}_4$  (42.4 mg, 0.2 mmol) and  $\text{ZnCl}_2$  (41.0 mg, 0.3 mmol). Under nitrogen atmosphere, pentafluorochlorobenzene (**1y**, 0.2 mmol), hexanol (**2a**, 0.6 mmol), DMSO (4 mL) were added, subsequently. The mixture was degassed *via* freeze-pump-thaw for three times, and irradiated under a blue LED (2-meter strips, 18 W, 456 nm) for 24 hrs at rt. The resulting mixture was quenched with  $\text{H}_2\text{O}$  (2 mL) and extracted with  $\text{Et}_2\text{O}$  (5 mL  $\times$  3). The combined organic layer was washed with saturated brine, dried over  $\text{MgSO}_4$  and concentrated in vacuo. Silica gel chromatography (eluent: petroleum ether/ $\text{EtOAc}$  = 5/1) of the crude product afforded the desired compound.

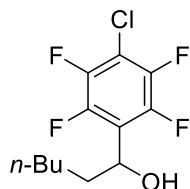

**1-(4-Chloro-2,3,5,6-tetrafluorophenyl)hexan-1-ol (3ya)**: colorless oil (26 mg, 45%). Major component:  $^1\text{H NMR}$  (400 MHz,  $\text{CDCl}_3$ ):  $\delta$  5.05 (t,  $J$  = 7.4 Hz, 1H), 2.16 (s, 1H), 2.05 – 1.95 (m, 1H), 1.88 – 1.77 (m, 1H), 1.52 – 1.39 (m, 1H), 1.36 – 1.28 (m, 5H), 0.88 (t,  $J$  = 6.8 Hz, 3H);  $^{19}\text{F NMR}$  (377 MHz,  $\text{CDCl}_3$ ):  $\delta$  -140.91 – -141.03 (m, 2F), -143.31 – -143.42 (m, 2F);  $^{13}\text{C NMR}$  (100 MHz,  $\text{CDCl}_3$ ):  $\delta$  146.04 – 143.18 (m), 145.47 – 142.62 (m), 126.10 (t,  $J$  = 5.2 Hz), 121.13 (t,  $J$  = 15.3 Hz), 66.79 (t,  $J$  = 1.6 Hz), 36.96 (t,  $J$  = 1.7 Hz), 31.34, 25.45, 22.46, 13.93; HRMS (EI): Calcd for  $\text{C}_{12}\text{H}_{14}\text{OF}_4\text{Cl}$  [ $\text{M}+\text{H}$ ] $^+$  285.0669, found 285.0665.

## 7.6 Cyclic Voltammetry Experiments

Cyclic Voltammograms were collected using Vertex. C. EIS Chenhua (China) with a typical three-electrode cell which contained 0.5 M sodium sulfate ( $\text{Na}_2\text{SO}_4$ ) aqueous solution ( $\text{pH} \approx 7$ ) as electrolyte. The KCl-saturated Ag/AgCl and Pt net were used as the reference electrode and counter electrode, respectively. Sample (0.01 M) and tetrabutylammonium tetrafluoroborate (0.1 M) in DMSO were used for tests. Measurements were performed using glassy carbon working electrode, platinum wire counter electrode, and KCl-saturated Ag/AgCl reference electrode in a scan rate of 0.1 V/s.

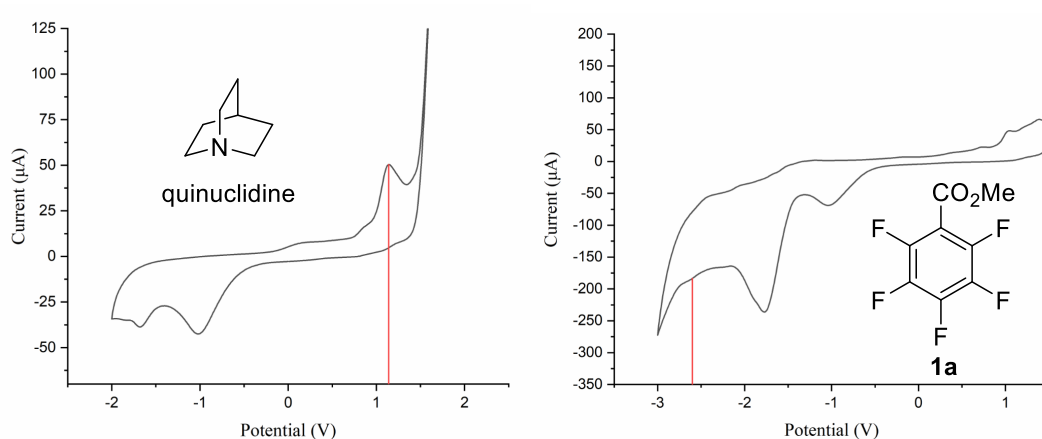

$E_{\text{p}}^{\text{ox}} = +1.14 \text{ V vs Ag/AgCl in DMSO}$

$E_{\text{p}}^{\text{red}} = -2.67 \text{ V vs Ag/AgCl in DMSO}$

## 7.7 Deuterium-Labeling Experiments and KIE Determination

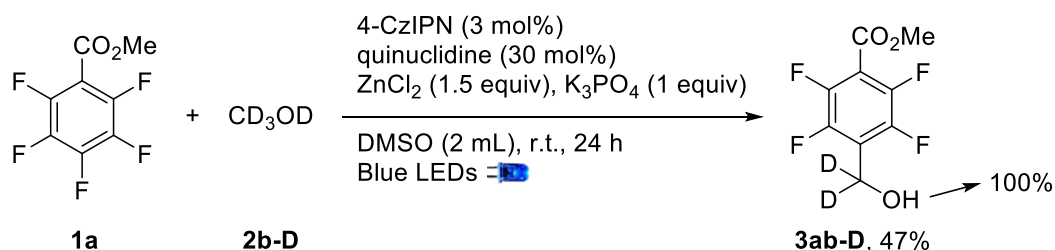

**Deuterium-labeling experiments:** **2b-D** (21  $\mu\text{L}$ , 0.5 mmol) was used to perform the defluoroalkylation reaction under the standard conditions. Silica gel chromatography (eluent: petroleum ether/EtOAc = 2/1) of the crude product mixture afforded compound **3ab-D** as a colorless liquid. The product was analyzed by  $^1\text{H}$  NMR to determine the ratio of H-D exchange.

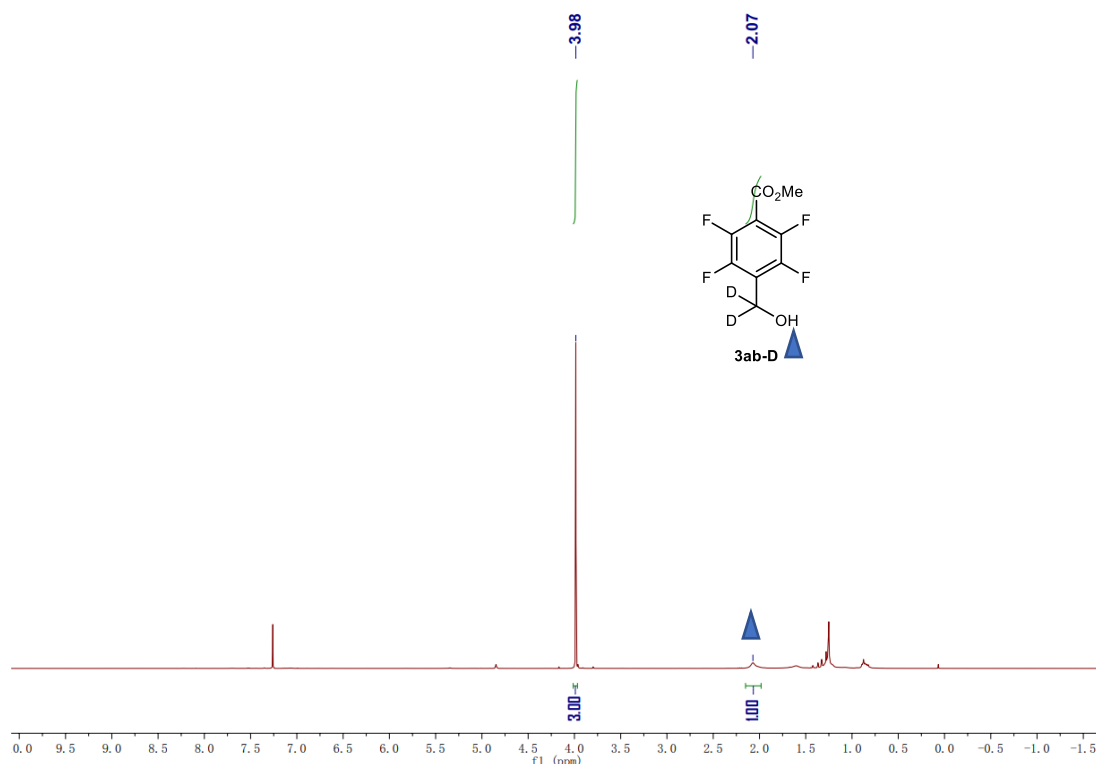

**Methyl 2,3,5,6-tetrafluoro-4-(hydroxymethyl-d2)benzoate (3ab-D):** colorless oil (23 mg, 47%).  $^1\text{H}$  NMR (400 MHz,  $\text{CDCl}_3$ ):  $\delta$  3.98 (s, 3H), 2.07 (s, 1H);  $^{19}\text{F}$  NMR (377 MHz,  $\text{CDCl}_3$ ):  $\delta$  -139.22 – -139.34 (m, 2F), -143.44 – -143.56 (m, 2F);  $^{13}\text{C}$  NMR (100 MHz,  $\text{CDCl}_3$ ):  $\delta$  160.11 – 160.01 (m), 146.38 – 143.57 (m), 145.89 - 143.08 (m), 121.54 (t,  $J = 17.4$  Hz), 112.48 (t,  $J = 16.1$  Hz), 53.33; HRMS (EI): Calcd for  $\text{C}_9\text{H}_5\text{D}_2\text{O}_3\text{F}_4$   $[\text{M}+\text{H}]^+$  241.0457, found 241.0451.

#### Determination of the KIE value

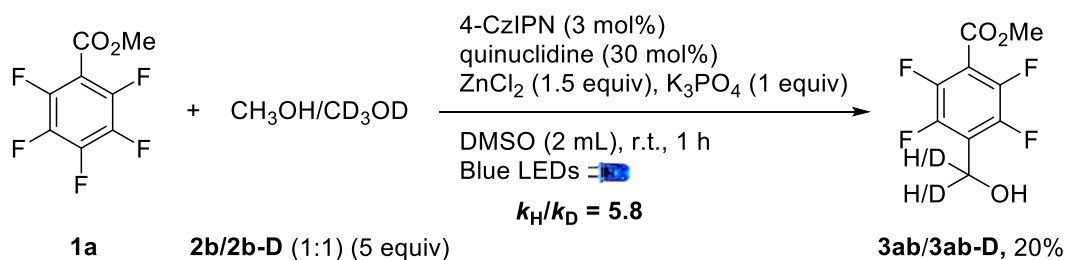

The KIE value (5.8) was determined by the measurement of initial rates of the reaction by  $^1\text{H}$  NMR and  $^{19}\text{F}$  NMR using trifluorotoluene (0.033 mmol) as an internal standard.

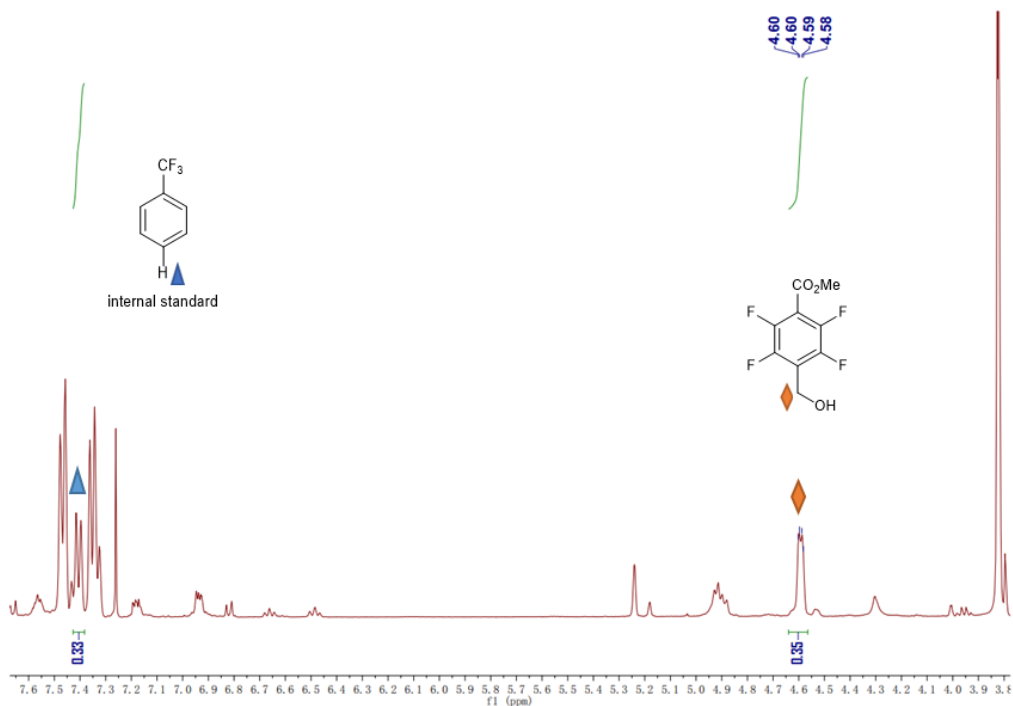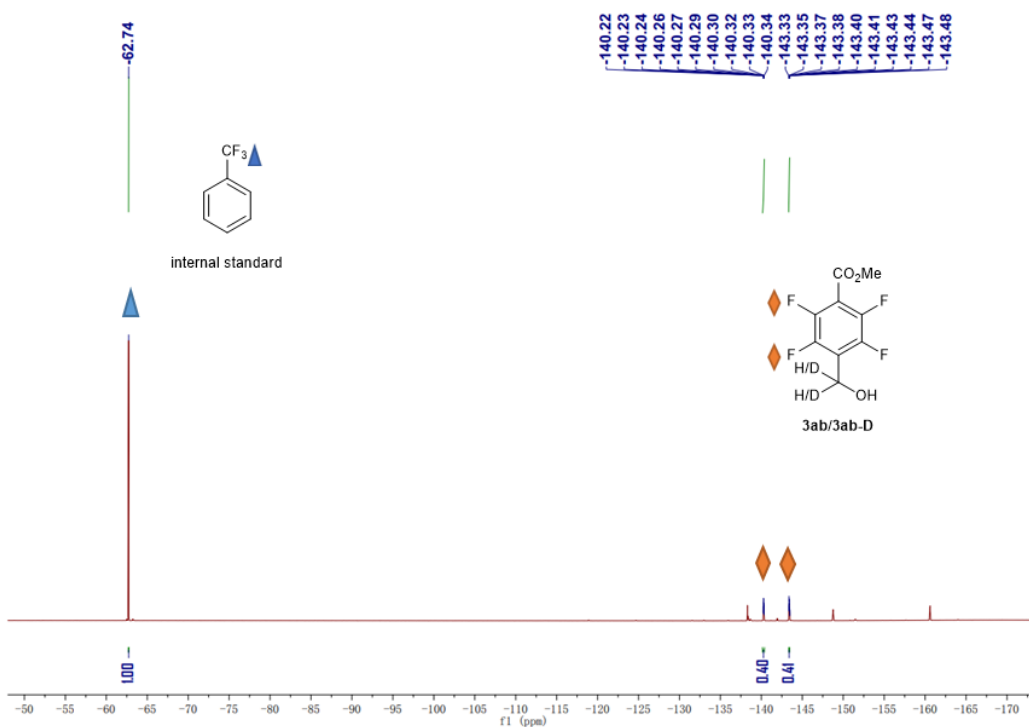

## 7.8 Quantum Yield Measurement

Determination of the light intensity at 470 nm: Following Yoon's protocol,<sup>2</sup> the photon flux of the spectrophotometer was determined by standard ferrioxalate actinometry. A 0.15 M solution of ferrioxalate was prepared by dissolving 2.21 g of potassium



ferrioxalate hydrate in 30 mL of 0.05 M H<sub>2</sub>SO<sub>4</sub>. A buffered solution of phenanthroline was prepared by dissolving 50 mg of phenanthroline and 11.25 g of sodium acetate in 50 mL of 0.5 M H<sub>2</sub>SO<sub>4</sub>. Both solutions were stored in the dark. To determine the photon flux of the spectrophotometer, 2.0 mL of the ferrioxalate solution was placed in a cuvette and irradiated for 90.0 seconds at  $\lambda = 470$  nm with an emission slit width at 10.0 nm. After irradiation, 0.35 mL of the phenanthroline solution was added to the cuvette. The solution was then allowed to rest for 1 h to allow the ferrous ions to completely coordinate to the phenanthroline. The absorbance of the solution was measured at 510 nm. A non-irradiated sample was also prepared and the absorbance at 510 nm measured. Conversion was calculated using eq (1).

$$\text{mol Fe}^{2+} = \frac{V \cdot \Delta A}{l \cdot \epsilon} \quad (1)$$

Where V is the total volume (0.00235 L) of the solution after addition of phenanthroline,  $\Delta A$  is the difference in absorbance at 510 nm between the irradiated and non-irradiated solutions, l is the path length (1.000 cm), and  $\epsilon$  is the molar absorptivity at 510 nm (11,100 L mol<sup>-1</sup> cm<sup>-1</sup>). The photon flux can be calculated using eq (2).

$$\text{Photon flux} = \frac{\text{mol Fe}^{2+}}{\Phi \cdot t \cdot f} \quad (2)$$

Where  $\Phi$  is the quantum yield for the ferrioxalate actinometer (0.92 for a 0.15 M solution at  $\lambda = 468$  nm),<sup>3</sup> t is the time (90.0 s), and f is the fraction of light absorbed at  $\lambda = 470$  nm (0.14, vide infra).<sup>4</sup> The photon flux was calculated (average of three experiments) to be  $3.22 \times 10^{-8}$  einstein s<sup>-1</sup>.

$$\text{mol Fe}^{2+} = \frac{0.00235 \text{ L} \cdot 1.76}{1.000 \text{ cm} \cdot 11100 \text{ L mol}^{-1} \text{ cm}^{-1}} = 3.73 \times 10^{-7} \text{ mol}$$

$$\text{Photon flux} = \frac{3.73 \times 10^{-7} \text{ mol}}{0.92 \cdot 90.0 \text{ s} \cdot 0.14} = 3.22 \times 10^{-8} \text{ mol}$$

#### Determination of quantum yield:

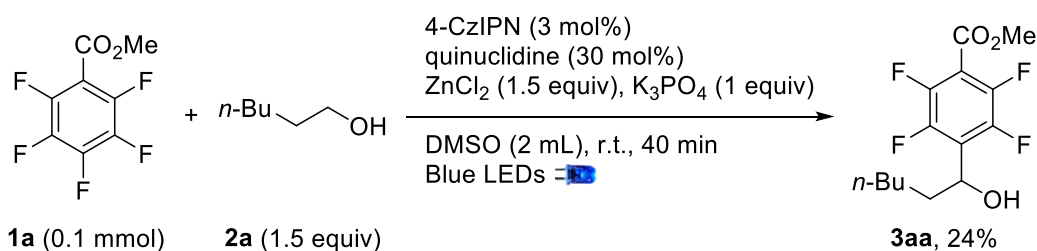

A cuvette was charged with **1a** (15  $\mu$ L, 0.1 mmol), **2a** (19  $\mu$ L, 0.15mmol), 4-CZIPN (**PC**, 2.4 mg, 0.003 mmol), quinuclidine (3.3 mg, 0.03 mmol),  $K_3PO_4$  (21.2 mg, 0.1 mmol) and  $ZnCl_2$  (20.5 mg, 0.15 mmol).and DMSO (2 mL). The cuvette was then capped with a PTFE stopper. The sample was stirred and irradiated ( $\lambda = 470$  nm, slit width = 10.0 nm) for 2400 s (40 min). After irradiation, the solvent was removed. The yield of product formed was determined as 24% by crude  $^{19}F$  NMR using trifluorotoluene as the internal standard. The quantum yield was determined using eq (3). Essentially all incident light ( $f > 0.999$ , vide infra) is absorbed by the 4-CZIPN at the reaction conditions described above.  $\Phi$  (24%) = 0.31.

$$\Phi = \frac{mol\ product}{flux \cdot t \cdot f} \quad (3)$$

$$\Phi = \frac{0.24 \times 0.1 \times 10^{-3} mol}{3.21 \times 10^{-8} mol \cdot 2400 s \cdot 1.00} = 0.31$$

## 8. DFT Calculation

### 1. Computational details

All density functional theory (DFT) calculations were conducted with the Gaussian 16C program,<sup>5</sup> using the popular functionals of M06-2X.<sup>6</sup> Geometry optimizations were carried out with the Def2-TZVP basis set for all atoms,<sup>7</sup> using Truhlar's S56 SMD method (Solvation Model based on the Quantum Mechanical Charge Density),<sup>8</sup> with DMSO as the solvent. Cartesian coordinates (in  $\text{\AA}$ ) of related structures which optimized at the M06-2X/Def2-TZVP level of theory. The grid data of orbital Weighted Fukui function  $f_w^+$  (OW\_  $f^+$ , delta:0.066) were calculated *via* Multiwfn developed by Tian Lu,<sup>9-10</sup> which were further illustrated by VMD 1.9.3 program.<sup>11</sup>

### 2. Condensed Orbital Weighted (OW) Fukui function and dual descriptors

#### 1a

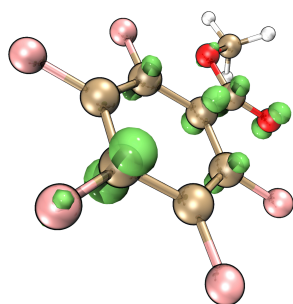

| Radial points: | 30      | Angular points: | 302     | Total:   | 9060 per center |
|----------------|---------|-----------------|---------|----------|-----------------|
| Atom index     | OW f+   | OW f-           | OW f0   | OW       |                 |
| <b>DD</b>      |         |                 |         |          |                 |
| 1(C)           | 0.15419 | 0.08005         | 0.11712 | 0.07414  |                 |
| 2(C)           | 0.06089 | 0.15429         | 0.10759 | -0.09340 |                 |
| 3(C)           | 0.10444 | 0.14246         | 0.12345 | -0.03802 |                 |
| 4(C)           | 0.14709 | 0.08574         | 0.11641 | 0.06135  |                 |
| 5(C)           | 0.10357 | 0.14437         | 0.12397 | -0.04079 |                 |
| 6(C)           | 0.06122 | 0.15191         | 0.10656 | -0.09069 |                 |
| 7(F)           | 0.01898 | 0.04554         | 0.03226 | -0.02656 |                 |
| 8(F)           | 0.00695 | 0.04728         | 0.02711 | -0.04033 |                 |
| 9(F)           | 0.01927 | 0.04691         | 0.03309 | -0.02764 |                 |
| 10(F)          | 0.00705 | 0.04637         | 0.02671 | -0.03933 |                 |
| 11(F)          | 0.03529 | 0.01893         | 0.02711 | 0.01636  |                 |
| 12(C)          | 0.13368 | 0.00938         | 0.07153 | 0.12430  |                 |
| 13(O)          | 0.09554 | 0.01782         | 0.05668 | 0.07772  |                 |
| 14(O)          | 0.04227 | 0.00564         | 0.02396 | 0.03663  |                 |
| 15(C)          | 0.00477 | 0.00159         | 0.00318 | 0.00318  |                 |
| 16(H)          | 0.00037 | 0.00013         | 0.00025 | 0.00024  |                 |
| 17(H)          | 0.00217 | 0.00076         | 0.00146 | 0.00140  |                 |
| 18(H)          | 0.00217 | 0.00076         | 0.00146 | 0.00140  |                 |

**1f**

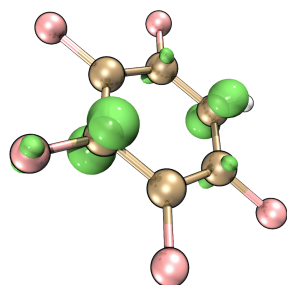

| Radial points: | 30    | Angular points: | 302   | Total: | 9060 per center |
|----------------|-------|-----------------|-------|--------|-----------------|
| Atom index     | OW f+ | OW f-           | OW f0 | OW     |                 |

DD

|       |         |         |         |          |
|-------|---------|---------|---------|----------|
| 1(C)  | 0.17330 | 0.09109 | 0.13220 | 0.08221  |
| 2(C)  | 0.11877 | 0.15508 | 0.13692 | -0.03631 |
| 3(C)  | 0.12721 | 0.14563 | 0.13642 | -0.01843 |
| 4(C)  | 0.17238 | 0.09695 | 0.13466 | 0.07544  |
| 5(C)  | 0.12721 | 0.14563 | 0.13642 | -0.01843 |
| 6(C)  | 0.11877 | 0.15508 | 0.13692 | -0.03631 |
| 7(H)  | 0.02944 | 0.00657 | 0.01801 | 0.02287  |
| 8(F)  | 0.02345 | 0.04441 | 0.03393 | -0.02095 |
| 9(F)  | 0.02316 | 0.04647 | 0.03481 | -0.02331 |
| 10(F) | 0.02345 | 0.04441 | 0.03393 | -0.02095 |
| 11(F) | 0.02316 | 0.04647 | 0.03481 | -0.02331 |
| 12(F) | 0.03973 | 0.02224 | 0.03099 | 0.01750  |

Sum of orbital weighted f+ 1.000033

Sum of orbital weighted f- 1.000016

1g

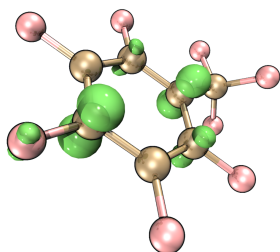

Radial points: 30 Angular points: 302 Total: 9060 per center

Atom index OW f+ OW f- OW f0 OW

DD

|      |         |         |         |          |
|------|---------|---------|---------|----------|
| 1(C) | 0.15114 | 0.11492 | 0.13303 | 0.03621  |
| 2(C) | 0.10480 | 0.16791 | 0.13636 | -0.06311 |
| 3(C) | 0.16995 | 0.12371 | 0.14683 | 0.04624  |
| 4(C) | 0.16993 | 0.12369 | 0.14681 | 0.04624  |
| 5(C) | 0.10480 | 0.16791 | 0.13635 | -0.06311 |
| 6(C) | 0.15116 | 0.11494 | 0.13305 | 0.03622  |

|       |         |         |         |          |
|-------|---------|---------|---------|----------|
| 7(F)  | 0.01626 | 0.05303 | 0.03465 | -0.03678 |
| 8(F)  | 0.01626 | 0.05303 | 0.03464 | -0.03678 |
| 9(F)  | 0.03091 | 0.03131 | 0.03111 | -0.00040 |
| 10(F) | 0.03090 | 0.03130 | 0.03110 | -0.00040 |
| 11(H) | 0.02690 | 0.00908 | 0.01799 | 0.01783  |
| 12(H) | 0.02691 | 0.00908 | 0.01799 | 0.01783  |

**1r**

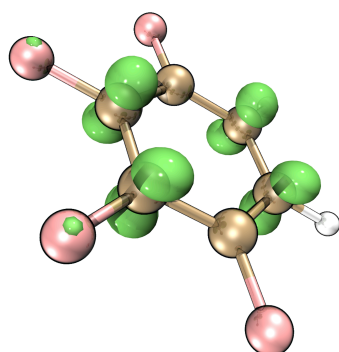

Radial points: 30    Angular points: 302    Total: 9060 per center  
 Atom index    OW f+    OW f-    OW f0    OW

**DD**

|       |         |         |         |          |
|-------|---------|---------|---------|----------|
| 1(C)  | 0.18438 | 0.07932 | 0.13185 | 0.10506  |
| 2(C)  | 0.09161 | 0.15416 | 0.12288 | -0.06255 |
| 3(C)  | 0.12701 | 0.15350 | 0.14025 | -0.02649 |
| 4(C)  | 0.17436 | 0.08052 | 0.12744 | 0.09384  |
| 5(C)  | 0.11930 | 0.14642 | 0.13286 | -0.02712 |
| 6(C)  | 0.10073 | 0.16166 | 0.13119 | -0.06092 |
| 7(F)  | 0.02327 | 0.04783 | 0.03555 | -0.02456 |
| 8(F)  | 0.01400 | 0.04799 | 0.03099 | -0.03399 |
| 9(F)  | 0.02072 | 0.04641 | 0.03357 | -0.02568 |
| 10(F) | 0.01655 | 0.05100 | 0.03377 | -0.03445 |
| 11(F) | 0.04180 | 0.01878 | 0.03029 | 0.02301  |
| 12(C) | 0.04559 | 0.00617 | 0.02588 | 0.03942  |
| 13(F) | 0.01701 | 0.00284 | 0.00992 | 0.01417  |

|       |         |         |         |         |
|-------|---------|---------|---------|---------|
| 14(F) | 0.01697 | 0.00283 | 0.00990 | 0.01414 |
| 15(F) | 0.00675 | 0.00062 | 0.00369 | 0.00613 |

**1t**

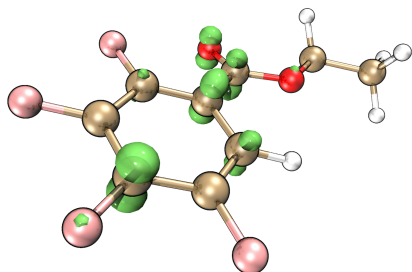

|                |       |                 |       |        |                 |
|----------------|-------|-----------------|-------|--------|-----------------|
| Radial points: | 30    | Angular points: | 302   | Total: | 9060 per center |
| Atom index     | OW f+ | OW f-           | OW f0 | OW     |                 |

**DD**

|       |         |         |         |          |
|-------|---------|---------|---------|----------|
| 1(C)  | 0.07250 | 0.11563 | 0.09406 | -0.04313 |
| 2(C)  | 0.09171 | 0.15504 | 0.12337 | -0.06334 |
| 3(C)  | 0.15162 | 0.11265 | 0.13213 | 0.03897  |
| 4(C)  | 0.12261 | 0.12615 | 0.12438 | -0.00354 |
| 5(C)  | 0.05693 | 0.15787 | 0.10740 | -0.10094 |
| 6(C)  | 0.14542 | 0.10298 | 0.12420 | 0.04244  |
| 7(F)  | 0.01547 | 0.05068 | 0.03307 | -0.03522 |
| 8(F)  | 0.00590 | 0.05093 | 0.02841 | -0.04503 |
| 9(F)  | 0.03241 | 0.02831 | 0.03036 | 0.00410  |
| 10(F) | 0.01040 | 0.03309 | 0.02174 | -0.02269 |
| 11(H) | 0.01633 | 0.00920 | 0.01277 | 0.00713  |
| 12(C) | 0.13391 | 0.01365 | 0.07378 | 0.12026  |
| 13(O) | 0.09690 | 0.02735 | 0.06212 | 0.06955  |
| 14(O) | 0.03834 | 0.00907 | 0.02370 | 0.02927  |
| 15(C) | 0.00433 | 0.00292 | 0.00363 | 0.00141  |
| 16(H) | 0.00184 | 0.00151 | 0.00168 | 0.00034  |
| 17(H) | 0.00183 | 0.00143 | 0.00163 | 0.00040  |
| 18(C) | 0.00079 | 0.00076 | 0.00078 | 0.00003  |
| 19(H) | 0.00033 | 0.00030 | 0.00032 | 0.00003  |

|                            |          |         |         |          |
|----------------------------|----------|---------|---------|----------|
| 20(H )                     | 0.00016  | 0.00017 | 0.00017 | -0.00001 |
| 21(H )                     | 0.00032  | 0.00030 | 0.00031 | 0.00002  |
| Sum of orbital weighted f+ | 1.000030 |         |         |          |
| Sum of orbital weighted f- | 1.000001 |         |         |          |

### 1u

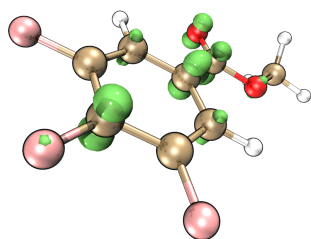

|                |       |                 |       |        |                 |
|----------------|-------|-----------------|-------|--------|-----------------|
| Radial points: | 30    | Angular points: | 302   | Total: | 9060 per center |
| Atom index     | OW f+ | OW f-           | OW f0 | OW     |                 |

### DD

|        |         |         |         |          |
|--------|---------|---------|---------|----------|
| 1(C )  | 0.06161 | 0.12632 | 0.09397 | -0.06471 |
| 2(C )  | 0.10919 | 0.13944 | 0.12431 | -0.03025 |
| 3(C )  | 0.15602 | 0.13034 | 0.14318 | 0.02567  |
| 4(C )  | 0.10851 | 0.13612 | 0.12232 | -0.02761 |
| 5(C )  | 0.06224 | 0.12982 | 0.09603 | -0.06757 |
| 6(C )  | 0.13483 | 0.13693 | 0.13588 | -0.00209 |
| 7(F )  | 0.00797 | 0.03960 | 0.02379 | -0.03163 |
| 8(F )  | 0.02979 | 0.04111 | 0.03545 | -0.01132 |
| 9(F )  | 0.00779 | 0.03826 | 0.02303 | -0.03047 |
| 10(H ) | 0.01429 | 0.01004 | 0.01216 | 0.00425  |
| 11(C ) | 0.14333 | 0.01658 | 0.07996 | 0.12675  |
| 12(O ) | 0.09765 | 0.02921 | 0.06343 | 0.06844  |
| 13(O ) | 0.04222 | 0.01047 | 0.02634 | 0.03175  |
| 14(H ) | 0.01485 | 0.01033 | 0.01259 | 0.00452  |
| 15(C ) | 0.00482 | 0.00262 | 0.00372 | 0.00221  |
| 16(H ) | 0.00220 | 0.00127 | 0.00174 | 0.00093  |
| 17(H ) | 0.00041 | 0.00021 | 0.00031 | 0.00020  |

|                            |          |         |         |         |
|----------------------------|----------|---------|---------|---------|
| 18(H )                     | 0.00220  | 0.00127 | 0.00174 | 0.00093 |
| Sum of orbital weighted f+ | 0.999926 |         |         |         |
| Sum of orbital weighted f- | 0.999930 |         |         |         |

1v

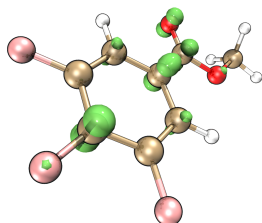

|                |         |                 |         |          |                 |
|----------------|---------|-----------------|---------|----------|-----------------|
| Radial points: | 30      | Angular points: | 302     | Total:   | 9060 per center |
| Atom index     | OW f+   | OW f-           | OW f0   | OW       |                 |
| DD             |         |                 |         |          |                 |
| 1(C )          | 0.08282 | 0.08623         | 0.08452 | -0.00341 |                 |
| 2(C )          | 0.07847 | 0.15937         | 0.11892 | -0.08089 |                 |
| 3(C )          | 0.13914 | 0.13765         | 0.13839 | 0.00149  |                 |
| 4(C )          | 0.14273 | 0.09454         | 0.11864 | 0.04819  |                 |
| 5(C )          | 0.05736 | 0.18545         | 0.12140 | -0.12809 |                 |
| 6(C )          | 0.15090 | 0.11609         | 0.13350 | 0.03481  |                 |
| 7(F )          | 0.00510 | 0.06029         | 0.03270 | -0.05519 |                 |
| 8(F )          | 0.03216 | 0.03314         | 0.03265 | -0.00098 |                 |
| 9(H )          | 0.01973 | 0.00626         | 0.01300 | 0.01347  |                 |
| 10(C )         | 0.13014 | 0.01722         | 0.07368 | 0.11292  |                 |
| 11(O )         | 0.09522 | 0.03067         | 0.06294 | 0.06455  |                 |
| 12(O )         | 0.03521 | 0.00831         | 0.02176 | 0.02690  |                 |
| 13(C )         | 0.00407 | 0.00222         | 0.00315 | 0.00185  |                 |
| 14(H )         | 0.00183 | 0.00106         | 0.00145 | 0.00077  |                 |
| 15(H )         | 0.00183 | 0.00106         | 0.00145 | 0.00077  |                 |
| 16(F )         | 0.01279 | 0.05446         | 0.03363 | -0.04167 |                 |
| 17(H )         | 0.01008 | 0.00571         | 0.00790 | 0.00437  |                 |
| 18(H )         | 0.00036 | 0.00018         | 0.00027 | 0.00017  |                 |



Sum of orbital weighted f+ 0.999951

Sum of orbital weighted f- 0.999919

### 3. Current orbital weights ( $\Delta=0.066$ a.u.) used in orbital-weighted (OW) calculation

#### 1a

HOMO energy: -0.319925 a.u. -8.706 eV

LUMO energy: -0.031879 a.u. -0.867 eV

Chemical potential: -0.175902 a.u. -4.787 eV

Delta parameter: 0.066000 a.u. 1.796 eV

The "E\_diff" in below output denotes difference between orbital energy with respect to chemical potential

#### 10 Highest weights in orbital-weighted f+

|         |             |         |         |         |          |
|---------|-------------|---------|---------|---------|----------|
| Orbital | 57 (LUMO )  | Weight: | 96.54 % | E_diff: | 3.919 eV |
| Orbital | 58 (LUMO+1) | Weight: | 2.90 %  | E_diff: | 5.164 eV |
| Orbital | 59 (LUMO+2) | Weight: | 0.56 %  | E_diff: | 5.655 eV |
| Orbital | 60 (LUMO+3) | Weight: | 0.00 %  | E_diff: | 7.114 eV |
| Orbital | 61 (LUMO+4) | Weight: | 0.00 %  | E_diff: | 7.222 eV |
| Orbital | 62 (LUMO+5) | Weight: | 0.00 %  | E_diff: | 7.610 eV |
| Orbital | 63 (LUMO+6) | Weight: | 0.00 %  | E_diff: | 8.130 eV |
| Orbital | 64 (LUMO+7) | Weight: | 0.00 %  | E_diff: | 8.526 eV |
| Orbital | 65 (LUMO+8) | Weight: | 0.00 %  | E_diff: | 8.835 eV |

Total weight of above listed orbitals: 100.00 %

#### 10 Highest weights in orbital-weighted f-

|         |             |         |         |         |           |
|---------|-------------|---------|---------|---------|-----------|
| Orbital | 56 (HOMO )  | Weight: | 73.77 % | E_diff: | -3.919 eV |
| Orbital | 55 (HOMO-1) | Weight: | 24.85 % | E_diff: | -4.344 eV |
| Orbital | 54 (HOMO-2) | Weight: | 1.03 %  | E_diff: | -5.399 eV |
| Orbital | 53 (HOMO-3) | Weight: | 0.35 %  | E_diff: | -5.715 eV |
| Orbital | 52 (HOMO-4) | Weight: | 0.00 %  | E_diff: | -6.969 eV |
| Orbital | 51 (HOMO-5) | Weight: | 0.00 %  | E_diff: | -7.174 eV |

|         |             |         |        |         |           |
|---------|-------------|---------|--------|---------|-----------|
| Orbital | 50 (HOMO-6) | Weight: | 0.00 % | E_diff: | -8.233 eV |
| Orbital | 49 (HOMO-7) | Weight: | 0.00 % | E_diff: | -8.315 eV |
| Orbital | 48 (HOMO-8) | Weight: | 0.00 % | E_diff: | -8.334 eV |
| Orbital | 47 (HOMO-9) | Weight: | 0.00 % | E_diff: | -9.145 eV |

Total weight of above listed orbitals: 100.00 %

### 1f

|                     |                |           |
|---------------------|----------------|-----------|
| HOMO energy:        | -0.315474 a.u. | -8.584 eV |
| LUMO energy:        | 0.007142 a.u.  | 0.194 eV  |
| Chemical potential: | -0.154166 a.u. | -4.195 eV |
| Delta parameter:    | 0.066000 a.u.  | 1.796 eV  |

The "E\_diff" in below output denotes difference between orbital energy with respect to chemical potential

#### 10 Highest weights in orbital-weighted f+

|         |             |         |         |         |          |
|---------|-------------|---------|---------|---------|----------|
| Orbital | 42 (LUMO )  | Weight: | 68.26 % | E_diff: | 4.389 eV |
| Orbital | 43 (LUMO+1) | Weight: | 25.63 % | E_diff: | 4.736 eV |
| Orbital | 44 (LUMO+2) | Weight: | 6.10 %  | E_diff: | 5.201 eV |
| Orbital | 45 (LUMO+3) | Weight: | 0.01 %  | E_diff: | 7.028 eV |
| Orbital | 46 (LUMO+4) | Weight: | 0.00 %  | E_diff: | 7.391 eV |
| Orbital | 47 (LUMO+5) | Weight: | 0.00 %  | E_diff: | 8.108 eV |
| Orbital | 48 (LUMO+6) | Weight: | 0.00 %  | E_diff: | 8.857 eV |
| Orbital | 49 (LUMO+7) | Weight: | 0.00 %  | E_diff: | 9.548 eV |
| Orbital | 50 (LUMO+8) | Weight: | 0.00 %  | E_diff: | 9.643 eV |

Total weight of above listed orbitals: 100.00 %

#### 10 Highest weights in orbital-weighted f-

|         |             |         |         |         |           |
|---------|-------------|---------|---------|---------|-----------|
| Orbital | 41 (HOMO )  | Weight: | 71.98 % | E_diff: | -4.389 eV |
| Orbital | 40 (HOMO-1) | Weight: | 28.02 % | E_diff: | -4.723 eV |
| Orbital | 39 (HOMO-2) | Weight: | 0.00 %  | E_diff: | -7.773 eV |
| Orbital | 38 (HOMO-3) | Weight: | 0.00 %  | E_diff: | -8.661 eV |
| Orbital | 37 (HOMO-4) | Weight: | 0.00 %  | E_diff: | -8.781 eV |

|         |             |         |        |         |            |
|---------|-------------|---------|--------|---------|------------|
| Orbital | 36 (HOMO-5) | Weight: | 0.00 % | E_diff: | -9.585 eV  |
| Orbital | 35 (HOMO-6) | Weight: | 0.00 % | E_diff: | -10.861 eV |
| Orbital | 34 (HOMO-7) | Weight: | 0.00 % | E_diff: | -10.877 eV |
| Orbital | 33 (HOMO-8) | Weight: | 0.00 % | E_diff: | -11.102 eV |
| Orbital | 32 (HOMO-9) | Weight: | 0.00 % | E_diff: | -11.493 eV |

Total weight of above listed orbitals: 100.00 %

### 1g

|                     |                |           |
|---------------------|----------------|-----------|
| HOMO energy:        | -0.313335 a.u. | -8.526 eV |
| LUMO energy:        | 0.008771 a.u.  | 0.239 eV  |
| Chemical potential: | -0.152282 a.u. | -4.144 eV |
| Delta parameter:    | 0.066000 a.u.  | 1.796 eV  |

The "E\_diff" in below output denotes difference between orbital energy with respect to chemical potential

#### 10 Highest weights in orbital-weighted f+

|         |             |         |         |         |          |
|---------|-------------|---------|---------|---------|----------|
| Orbital | 38 (LUMO )  | Weight: | 72.63 % | E_diff: | 4.382 eV |
| Orbital | 39 (LUMO+1) | Weight: | 25.08 % | E_diff: | 4.758 eV |
| Orbital | 40 (LUMO+2) | Weight: | 2.28 %  | E_diff: | 5.511 eV |
| Orbital | 41 (LUMO+3) | Weight: | 0.00 %  | E_diff: | 7.134 eV |
| Orbital | 42 (LUMO+4) | Weight: | 0.00 %  | E_diff: | 7.329 eV |
| Orbital | 43 (LUMO+5) | Weight: | 0.00 %  | E_diff: | 8.103 eV |
| Orbital | 44 (LUMO+6) | Weight: | 0.00 %  | E_diff: | 8.787 eV |
| Orbital | 45 (LUMO+7) | Weight: | 0.00 %  | E_diff: | 9.154 eV |
| Orbital | 46 (LUMO+8) | Weight: | 0.00 %  | E_diff: | 9.638 eV |

Total weight of above listed orbitals: 100.00 %

#### 10 Highest weights in orbital-weighted f-

|         |             |         |         |         |           |
|---------|-------------|---------|---------|---------|-----------|
| Orbital | 37 (HOMO )  | Weight: | 70.44 % | E_diff: | -4.382 eV |
| Orbital | 36 (HOMO-1) | Weight: | 29.56 % | E_diff: | -4.691 eV |
| Orbital | 35 (HOMO-2) | Weight: | 0.00 %  | E_diff: | -7.855 eV |
| Orbital | 34 (HOMO-3) | Weight: | 0.00 %  | E_diff: | -8.158 eV |

|         |             |         |        |         |            |
|---------|-------------|---------|--------|---------|------------|
| Orbital | 33 (HOMO-4) | Weight: | 0.00 % | E_diff: | -8.673 eV  |
| Orbital | 32 (HOMO-5) | Weight: | 0.00 % | E_diff: | -9.268 eV  |
| Orbital | 31 (HOMO-6) | Weight: | 0.00 % | E_diff: | -10.661 eV |
| Orbital | 30 (HOMO-7) | Weight: | 0.00 % | E_diff: | -10.905 eV |
| Orbital | 29 (HOMO-8) | Weight: | 0.00 % | E_diff: | -10.961 eV |
| Orbital | 28 (HOMO-9) | Weight: | 0.00 % | E_diff: | -11.434 eV |

Total weight of above listed orbitals: 100.00 %

### 1r

|                     |                |           |
|---------------------|----------------|-----------|
| HOMO energy:        | -0.326010 a.u. | -8.871 eV |
| LUMO energy:        | -0.016123 a.u. | -0.439 eV |
| Chemical potential: | -0.171067 a.u. | -4.655 eV |
| Delta parameter:    | 0.066000 a.u.  | 1.796 eV  |

The "E\_diff" in below output denotes difference between orbital energy with respect to chemical potential

10 Highest weights in orbital-weighted f<sup>+</sup>

|         |             |         |         |         |          |
|---------|-------------|---------|---------|---------|----------|
| Orbital | 58 (LUMO )  | Weight: | 84.48 % | E_diff: | 4.216 eV |
| Orbital | 59 (LUMO+1) | Weight: | 12.84 % | E_diff: | 4.884 eV |
| Orbital | 60 (LUMO+2) | Weight: | 2.67 %  | E_diff: | 5.377 eV |
| Orbital | 61 (LUMO+3) | Weight: | 0.00 %  | E_diff: | 7.284 eV |
| Orbital | 62 (LUMO+4) | Weight: | 0.00 %  | E_diff: | 7.951 eV |
| Orbital | 63 (LUMO+5) | Weight: | 0.00 %  | E_diff: | 8.774 eV |
| Orbital | 64 (LUMO+6) | Weight: | 0.00 %  | E_diff: | 9.082 eV |
| Orbital | 65 (LUMO+7) | Weight: | 0.00 %  | E_diff: | 9.328 eV |
| Orbital | 66 (LUMO+8) | Weight: | 0.00 %  | E_diff: | 9.465 eV |

Total weight of above listed orbitals: 100.00 %

10 Highest weights in orbital-weighted f<sup>-</sup>

|         |             |         |         |         |           |
|---------|-------------|---------|---------|---------|-----------|
| Orbital | 57 (HOMO )  | Weight: | 77.80 % | E_diff: | -4.216 eV |
| Orbital | 56 (HOMO-1) | Weight: | 22.20 % | E_diff: | -4.671 eV |
| Orbital | 55 (HOMO-2) | Weight: | 0.00 %  | E_diff: | -7.624 eV |

|         |             |         |        |         |            |
|---------|-------------|---------|--------|---------|------------|
| Orbital | 54 (HOMO-3) | Weight: | 0.00 % | E_diff: | -8.273 eV  |
| Orbital | 53 (HOMO-4) | Weight: | 0.00 % | E_diff: | -8.511 eV  |
| Orbital | 52 (HOMO-5) | Weight: | 0.00 % | E_diff: | -9.499 eV  |
| Orbital | 51 (HOMO-6) | Weight: | 0.00 % | E_diff: | -9.730 eV  |
| Orbital | 50 (HOMO-7) | Weight: | 0.00 % | E_diff: | -10.037 eV |
| Orbital | 49 (HOMO-8) | Weight: | 0.00 % | E_diff: | -10.139 eV |
| Orbital | 48 (HOMO-9) | Weight: | 0.00 % | E_diff: | -10.240 eV |

Total weight of above listed orbitals: 100.00 %

### 1t

|                     |                |           |
|---------------------|----------------|-----------|
| HOMO energy:        | -0.319853 a.u. | -8.704 eV |
| LUMO energy:        | -0.027371 a.u. | -0.745 eV |
| Chemical potential: | -0.173612 a.u. | -4.724 eV |
| Delta parameter:    | 0.066000 a.u.  | 1.796 eV  |

The "E\_diff" in below output denotes difference between orbital energy with respect to chemical potential

#### 10 Highest weights in orbital-weighted f+

|         |             |         |         |         |          |
|---------|-------------|---------|---------|---------|----------|
| Orbital | 57 (LUMO )  | Weight: | 95.49 % | E_diff: | 3.979 eV |
| Orbital | 58 (LUMO+1) | Weight: | 4.34 %  | E_diff: | 5.080 eV |
| Orbital | 59 (LUMO+2) | Weight: | 0.16 %  | E_diff: | 6.033 eV |
| Orbital | 60 (LUMO+3) | Weight: | 0.01 %  | E_diff: | 6.810 eV |
| Orbital | 61 (LUMO+4) | Weight: | 0.00 %  | E_diff: | 7.135 eV |
| Orbital | 62 (LUMO+5) | Weight: | 0.00 %  | E_diff: | 7.625 eV |
| Orbital | 63 (LUMO+6) | Weight: | 0.00 %  | E_diff: | 8.043 eV |
| Orbital | 64 (LUMO+7) | Weight: | 0.00 %  | E_diff: | 8.080 eV |
| Orbital | 65 (LUMO+8) | Weight: | 0.00 %  | E_diff: | 8.524 eV |

Total weight of above listed orbitals: 100.00 %

#### 10 Highest weights in orbital-weighted f-

|         |             |         |         |         |           |
|---------|-------------|---------|---------|---------|-----------|
| Orbital | 56 (HOMO )  | Weight: | 67.46 % | E_diff: | -3.979 eV |
| Orbital | 55 (HOMO-1) | Weight: | 30.33 % | E_diff: | -4.291 eV |

|         |             |         |        |         |           |
|---------|-------------|---------|--------|---------|-----------|
| Orbital | 54 (HOMO-2) | Weight: | 1.61 % | E_diff: | -5.280 eV |
| Orbital | 53 (HOMO-3) | Weight: | 0.59 % | E_diff: | -5.580 eV |
| Orbital | 52 (HOMO-4) | Weight: | 0.01 % | E_diff: | -6.721 eV |
| Orbital | 51 (HOMO-5) | Weight: | 0.00 % | E_diff: | -6.839 eV |
| Orbital | 50 (HOMO-6) | Weight: | 0.00 % | E_diff: | -7.391 eV |
| Orbital | 49 (HOMO-7) | Weight: | 0.00 % | E_diff: | -7.585 eV |
| Orbital | 48 (HOMO-8) | Weight: | 0.00 % | E_diff: | -8.096 eV |
| Orbital | 47 (HOMO-9) | Weight: | 0.00 % | E_diff: | -8.150 eV |

Total weight of above listed orbitals: 100.00 %

### 1u

|                     |                |           |
|---------------------|----------------|-----------|
| HOMO energy:        | -0.323670 a.u. | -8.807 eV |
| LUMO energy:        | -0.025742 a.u. | -0.700 eV |
| Chemical potential: | -0.174706 a.u. | -4.754 eV |
| Delta parameter:    | 0.066000 a.u.  | 1.796 eV  |

The "E\_diff" in below output denotes difference between orbital energy with respect to chemical potential

#### 10 Highest weights in orbital-weighted f+

|         |             |         |         |         |          |
|---------|-------------|---------|---------|---------|----------|
| Orbital | 49 (LUMO )  | Weight: | 94.88 % | E_diff: | 4.054 eV |
| Orbital | 50 (LUMO+1) | Weight: | 5.08 %  | E_diff: | 5.086 eV |
| Orbital | 51 (LUMO+2) | Weight: | 0.03 %  | E_diff: | 6.492 eV |
| Orbital | 52 (LUMO+3) | Weight: | 0.00 %  | E_diff: | 7.136 eV |
| Orbital | 53 (LUMO+4) | Weight: | 0.00 %  | E_diff: | 7.358 eV |
| Orbital | 54 (LUMO+5) | Weight: | 0.00 %  | E_diff: | 7.828 eV |
| Orbital | 55 (LUMO+6) | Weight: | 0.00 %  | E_diff: | 8.164 eV |
| Orbital | 56 (LUMO+7) | Weight: | 0.00 %  | E_diff: | 8.391 eV |
| Orbital | 57 (LUMO+8) | Weight: | 0.00 %  | E_diff: | 8.798 eV |

Total weight of above listed orbitals: 100.00 %

#### 10 Highest weights in orbital-weighted f-

|         |            |         |         |         |           |
|---------|------------|---------|---------|---------|-----------|
| Orbital | 48 (HOMO ) | Weight: | 51.14 % | E_diff: | -4.054 eV |
|---------|------------|---------|---------|---------|-----------|

|         |             |         |         |         |           |
|---------|-------------|---------|---------|---------|-----------|
| Orbital | 47 (HOMO-1) | Weight: | 47.20 % | E_diff: | -4.085 eV |
| Orbital | 46 (HOMO-2) | Weight: | 1.30 %  | E_diff: | -5.319 eV |
| Orbital | 45 (HOMO-3) | Weight: | 0.36 %  | E_diff: | -5.694 eV |
| Orbital | 44 (HOMO-4) | Weight: | 0.00 %  | E_diff: | -6.997 eV |
| Orbital | 43 (HOMO-5) | Weight: | 0.00 %  | E_diff: | -7.217 eV |
| Orbital | 42 (HOMO-6) | Weight: | 0.00 %  | E_diff: | -7.669 eV |
| Orbital | 41 (HOMO-7) | Weight: | 0.00 %  | E_diff: | -8.008 eV |
| Orbital | 40 (HOMO-8) | Weight: | 0.00 %  | E_diff: | -8.376 eV |
| Orbital | 39 (HOMO-9) | Weight: | 0.00 %  | E_diff: | -8.544 eV |

Total weight of above listed orbitals: 100.00 %

#### 1v

|                     |                |           |
|---------------------|----------------|-----------|
| HOMO energy:        | -0.313889 a.u. | -8.541 eV |
| LUMO energy:        | -0.025042 a.u. | -0.681 eV |
| Chemical potential: | -0.169465 a.u. | -4.611 eV |
| Delta parameter:    | 0.066000 a.u.  | 1.796 eV  |

The "E\_diff" in below output denotes difference between orbital energy with respect to chemical potential

10 Highest weights in orbital-weighted f+

|         |             |         |         |         |          |
|---------|-------------|---------|---------|---------|----------|
| Orbital | 49 (LUMO )  | Weight: | 94.37 % | E_diff: | 3.930 eV |
| Orbital | 50 (LUMO+1) | Weight: | 5.62 %  | E_diff: | 4.954 eV |
| Orbital | 51 (LUMO+2) | Weight: | 0.01 %  | E_diff: | 6.824 eV |
| Orbital | 52 (LUMO+3) | Weight: | 0.00 %  | E_diff: | 7.022 eV |
| Orbital | 53 (LUMO+4) | Weight: | 0.00 %  | E_diff: | 7.140 eV |
| Orbital | 54 (LUMO+5) | Weight: | 0.00 %  | E_diff: | 7.630 eV |
| Orbital | 55 (LUMO+6) | Weight: | 0.00 %  | E_diff: | 7.809 eV |
| Orbital | 56 (LUMO+7) | Weight: | 0.00 %  | E_diff: | 8.029 eV |
| Orbital | 57 (LUMO+8) | Weight: | 0.00 %  | E_diff: | 8.490 eV |

Total weight of above listed orbitals: 100.00 %

10 Highest weights in orbital-weighted f-

|         |             |         |         |         |           |
|---------|-------------|---------|---------|---------|-----------|
| Orbital | 48 (HOMO )  | Weight: | 80.06 % | E_diff: | -3.930 eV |
| Orbital | 47 (HOMO-1) | Weight: | 18.23 % | E_diff: | -4.496 eV |
| Orbital | 46 (HOMO-2) | Weight: | 1.42 %  | E_diff: | -5.334 eV |
| Orbital | 45 (HOMO-3) | Weight: | 0.29 %  | E_diff: | -5.798 eV |
| Orbital | 44 (HOMO-4) | Weight: | 0.00 %  | E_diff: | -7.146 eV |
| Orbital | 43 (HOMO-5) | Weight: | 0.00 %  | E_diff: | -7.346 eV |
| Orbital | 42 (HOMO-6) | Weight: | 0.00 %  | E_diff: | -7.766 eV |
| Orbital | 41 (HOMO-7) | Weight: | 0.00 %  | E_diff: | -8.316 eV |
| Orbital | 40 (HOMO-8) | Weight: | 0.00 %  | E_diff: | -8.416 eV |
| Orbital | 39 (HOMO-9) | Weight: | 0.00 %  | E_diff: | -8.742 eV |

Total weight of above listed orbitals: 100.00 %

#### 4. Cartesian coordinates (in Å) of related structures

##### 1a

|   |             |             |            |
|---|-------------|-------------|------------|
| C | 0.44192400  | -2.17775900 | 0.00000000 |
| C | -0.84465500 | -1.67806600 | 0.00000000 |
| C | -1.05790800 | -0.31258200 | 0.00000000 |
| C | 0.00000000  | 0.59855500  | 0.00000000 |
| C | 1.28755400  | 0.05750000  | 0.00000000 |
| C | 1.51152100  | -1.30535700 | 0.00000000 |
| F | -2.32631600 | 0.07178400  | 0.00000000 |
| F | -1.87633400 | -2.51385500 | 0.00000000 |
| F | 2.36700400  | 0.82482400  | 0.00000000 |
| F | 2.75158900  | -1.77848700 | 0.00000000 |
| F | 0.64844500  | -3.48283200 | 0.00000000 |
| C | -0.17475000 | 2.08581900  | 0.00000000 |
| O | 0.74208400  | 2.86280700  | 0.00000000 |
| O | -1.44936600 | 2.44980100  | 0.00000000 |
| C | -1.68724000 | 3.86368100  | 0.00000000 |
| H | -2.76691200 | 3.97852700  | 0.00000000 |



|           |             |             |             |
|-----------|-------------|-------------|-------------|
| H         | -1.25650500 | 4.31847600  | 0.89068300  |
| H         | -1.25650500 | 4.31847600  | -0.89068300 |
| <b>1f</b> |             |             |             |
| C         | 0.00000000  | 0.00000000  | 1.11013300  |
| C         | 0.00000000  | 1.19810300  | 0.41972800  |
| C         | 0.00000000  | 1.18261100  | -0.96291800 |
| C         | 0.00000000  | 0.00000000  | -1.67231300 |
| C         | 0.00000000  | -1.18261100 | -0.96291800 |
| C         | 0.00000000  | -1.19810300 | 0.41972800  |
| H         | 0.00000000  | 0.00000000  | -2.75404400 |
| F         | 0.00000000  | 2.35144400  | -1.60386600 |
| F         | 0.00000000  | 2.34755200  | 1.08783200  |
| F         | 0.00000000  | -2.35144400 | -1.60386600 |
| F         | 0.00000000  | -2.34755200 | 1.08783200  |
| F         | 0.00000000  | 0.00000000  | 2.43711500  |
| <b>1g</b> |             |             |             |
| C         | 0.69073826  | 0.67916883  | 0.00000169  |
| C         | 1.37125386  | -0.52609775 | 0.00000658  |
| C         | 0.69430112  | -1.72606836 | 0.00000179  |
| C         | -0.69429152 | -1.72604169 | 0.00000187  |
| C         | -1.37125717 | -0.52609969 | 0.00000371  |
| C         | -0.69072835 | 0.67916546  | -0.00000244 |
| F         | 2.70766002  | -0.49029634 | -0.00000114 |
| F         | -2.70767253 | -0.49028942 | -0.00000235 |
| F         | -1.35131623 | 1.83338009  | -0.00000502 |
| F         | 1.35132101  | 1.83339332  | -0.00000026 |
| H         | -1.25639535 | -2.64989702 | 0.00000005  |
| H         | 1.25636770  | -2.64995262 | -0.00000038 |

**1r**

|           |             |             |             |
|-----------|-------------|-------------|-------------|
| C         | -2.12150615 | -0.05876700 | -0.00006100 |
| C         | -1.38041110 | -1.22738409 | 0.00001900  |
| C         | -0.00427000 | -1.15253808 | 0.00004000  |
| C         | 0.66307705  | 0.06538900  | -0.00010600 |
| C         | -0.09818901 | 1.22366409  | -0.00007100 |
| C         | -1.48120410 | 1.16434508  | -0.00007700 |
| F         | 0.69024005  | -2.28480417 | 0.00030300  |
| F         | -1.99235514 | -2.40286417 | 0.00011700  |
| F         | 0.45401903  | 2.42858317  | 0.00002600  |
| F         | -2.19229116 | 2.28339516  | -0.00007100 |
| F         | -3.44161025 | -0.11461801 | -0.00007600 |
| C         | 2.16874715  | 0.04193900  | -0.00005700 |
| F         | 2.63918019  | -0.60047205 | 1.07519008  |
| F         | 2.63917019  | -0.60404805 | -1.07314808 |
| F         | 2.70615119  | 1.25706309  | -0.00213200 |
| <b>It</b> |             |             |             |
| C         | 2.11401518  | -0.75534543 | 0.06773984  |
| C         | 0.79225441  | -1.16756122 | 0.02487437  |
| C         | -0.23771519 | -0.24123108 | -0.06437972 |
| C         | 0.08348029  | 1.11584159  | -0.10862149 |
| C         | 1.39629415  | 1.51506779  | -0.07181828 |
| C         | 2.42212075  | 0.58853011  | 0.01739663  |
| F         | 0.57419759  | -2.47545957 | 0.09145074  |
| F         | 1.72205187  | 2.80808574  | -0.12133613 |
| F         | 3.68729722  | 0.97914914  | 0.05498339  |
| F         | 3.08824362  | -1.65267474 | 0.15876187  |
| H         | -0.69216313 | 1.86502501  | -0.18046990 |
| C         | -1.66007894 | -0.69194162 | -0.13104360 |
| O         | -2.00353404 | -1.82232254 | -0.35848544 |

|           |             |             |             |
|-----------|-------------|-------------|-------------|
| O         | -2.50166998 | 0.31304229  | 0.08288489  |
| C         | -3.90683011 | -0.00629817 | 0.01059193  |
| H         | -4.11519170 | -0.42544124 | -0.97415340 |
| H         | -4.12632740 | -0.76513751 | 0.76218282  |
| C         | -4.67614151 | 1.26465830  | 0.25477964  |
| H         | -4.44146414 | 2.01342713  | -0.50234472 |
| H         | -5.74425206 | 1.05021721  | 0.20805022  |
| H         | -4.44947630 | 1.67392450  | 1.23968455  |
| <b>1u</b> |             |             |             |
| C         | -1.54124079 | -1.16171861 | 0.00000000  |
| C         | -1.31279412 | 0.19481888  | 0.00000000  |
| C         | 0.00000000  | 0.65318424  | 0.00000000  |
| C         | 1.07072969  | -0.23463907 | 0.00000000  |
| C         | 0.80625875  | -1.58599852 | 0.00000000  |
| C         | -0.49194608 | -2.06443672 | 0.00000000  |
| F         | 1.80018894  | -2.47655053 | 0.00000000  |
| F         | -0.72812426 | -3.37108677 | 0.00000000  |
| F         | -2.78397379 | -1.64766744 | 0.00000000  |
| H         | 2.09672126  | 0.10453456  | 0.00000000  |
| C         | 0.21587102  | 2.13016615  | 0.00000000  |
| O         | -0.67995714 | 2.93511233  | 0.00000000  |
| O         | 1.50399905  | 2.45623951  | 0.00000000  |
| H         | -2.14699103 | 0.88323602  | 0.00000000  |
| C         | 1.79231552  | 3.85899929  | 0.00000000  |
| H         | 1.37725988  | 4.32876297  | 0.89063019  |
| H         | 2.87543285  | 3.93937757  | 0.00000000  |
| H         | 1.37725988  | 4.32876297  | -0.89063019 |
| <b>1v</b> |             |             |             |
| C         | 1.81561675  | -1.15455115 | 0.00000000  |

|   |             |             |             |
|---|-------------|-------------|-------------|
| C | 1.35516142  | 0.14929429  | 0.00000000  |
| C | 0.00000000  | 0.46457980  | 0.00000000  |
| C | -0.91495927 | -0.59124700 | 0.00000000  |
| C | -0.47176680 | -1.88910221 | 0.00000000  |
| C | 0.88625709  | -2.16856341 | 0.00000000  |
| F | -1.33755172 | -2.90836185 | 0.00000000  |
| F | 1.28028858  | -3.43982384 | 0.00000000  |
| F | 2.27740051  | 1.11187211  | 0.00000000  |
| H | -1.97877259 | -0.40019029 | 0.00000000  |
| C | -0.47120450 | 1.87819278  | 0.00000000  |
| O | 0.24525689  | 2.84475654  | 0.00000000  |
| O | -1.80177396 | 1.95094496  | 0.00000000  |
| C | -2.35253360 | 3.27208388  | 0.00000000  |
| H | -2.03718213 | 3.81349375  | 0.89075855  |
| H | -2.03718213 | 3.81349375  | -0.89075855 |
| H | 2.87535068  | -1.37112507 | 0.00000000  |
| H | -3.43074013 | 3.14141617  | 0.00000000  |

## References

- (1) K. Sakai, K. Oisaki and M. Kanai, *Synthesis* 2020, **52**, 2171–2184.
- (2) M. A. Cismesia and T. P. Yoon, *Chem. Sci.* 2015, **6**, 5426–5434.
- (3) C. G. Hatchard and C. A. Parker, *P. Roy. Soc. A-Math. Phys.* 1956, **235**, 518–536.
- (4) W. C. Hartley, F. Schiel, E. Ermini and P. Melchiorre, *Angew. Chem. Int. Ed.* 2022, **61**, e2022047; *Angew. Chem.* 2022, 134, e202204735.
- (5) M. J. Frisch, G. W. Trucks, H. B. Schlegel, G. E. Scuseria, M. A. Robb, J. R. Cheeseman, G. Scalmani, V. Barone, G. A. Petersson, H. Nakatsuji, X. Li, M. Caricato, A. V. Marenich, J. Bloino, B. G. Janesko, R. Gomperts, B. Mennucci, H. P. Hratchian, J. V. Ortiz, A. F. Izmaylov, J. L. Sonnenberg, D. Williams-Young, F. Ding, F. Lipparini, F. Egidi, J. Goings, B. Peng, A. Petrone, T. Henderson, D. Ranasinghe, V. G. Zakrzewski, J. Gao, N. Rega, G. Zheng, W. Liang, M. Hada, M. Ehara, K. Toyota, R. Fukuda, J. Hasegawa, M. Ishida, T. Nakajima, Y. Honda, O. Kitao, H. Nakai, T. Vreven, K. Throssell, J. A. Jr. Montgomery, J. E. Peralta, F. Ogliaro, M. J. Bearpark, J. J. Heyd, E. N. Brothers, K. N. Kudin, V. N. Staroverov, T. A. Keith, R. Kobayashi, J. Normand, K. Raghavachari, A. P. Rendell, J. C. Burant, S. S. Iyengar, J. Tomasi, M. Cossi, J. M. Millam, M. Klene, C. Adamo, R. Cammi, J. W. Ochterski, R. L. Martin, K. Morokuma, O. Farkas, J. B. Foresman and D. J. Fox, *Gaussian 16 Revision C. 01.* 2016; Gaussian Inc. Wallingford CT 2016.
- (6) Y. Zhao and D. G. Truhlar, *Theor. Chem. Acc.* 2008, **120**, 215–241.
- (7) A. Schäfer, C. Huber and R. Ahlrichs, *J. Chem. Phys.* 1994, **100**, 5829–5835.
- (8) A. V. Marenich, C. J. Cramer and D. G. Truhlar, *J. Phys. Chem. B* 2009, **113**, 6378–6396.
- (9) T. Lu and Q. Chen, in *Conceptual Density Functional Theory*, 2022, pp. 631–647.
- (10) T. Lu and F. Chen, *J. Comput. Chem.* 2012, **33**, 580–592.
- (11) W. Humphrey, A. Dalke and K. Schulten, *J. Mol. Graph.* 1996, **14**, 33–38.

# $^1\text{H}$ , $^{19}\text{F}$ , $^{13}\text{C}$ -NMR Spectra

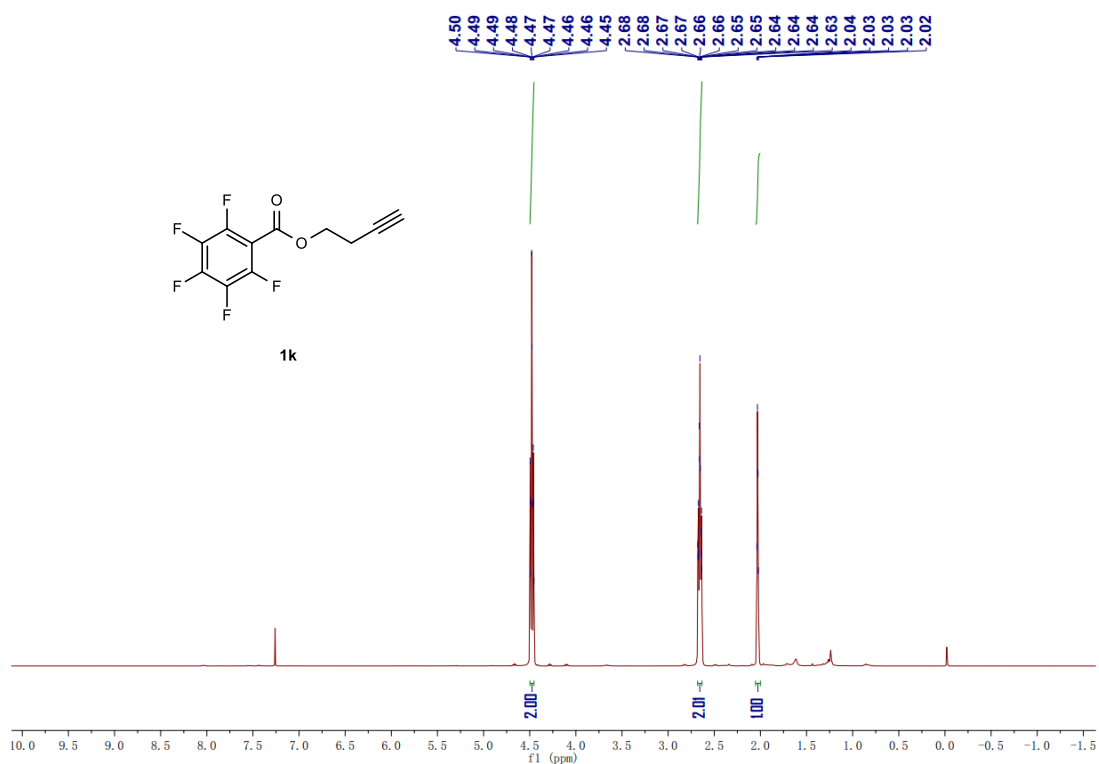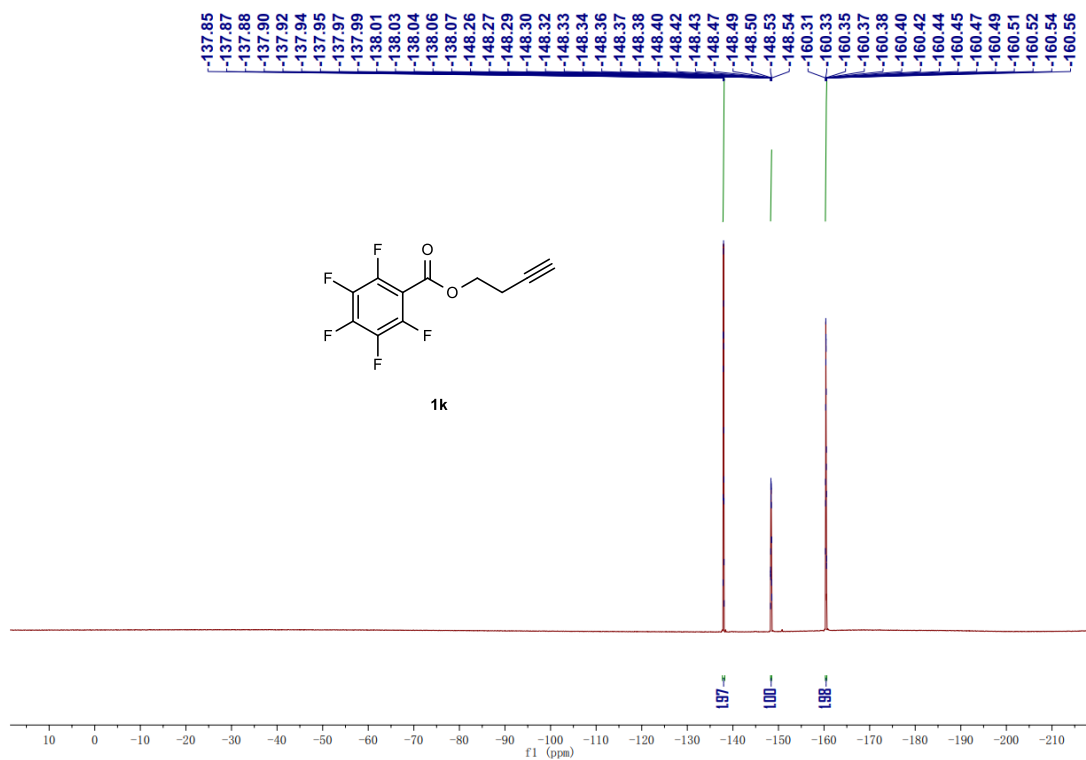

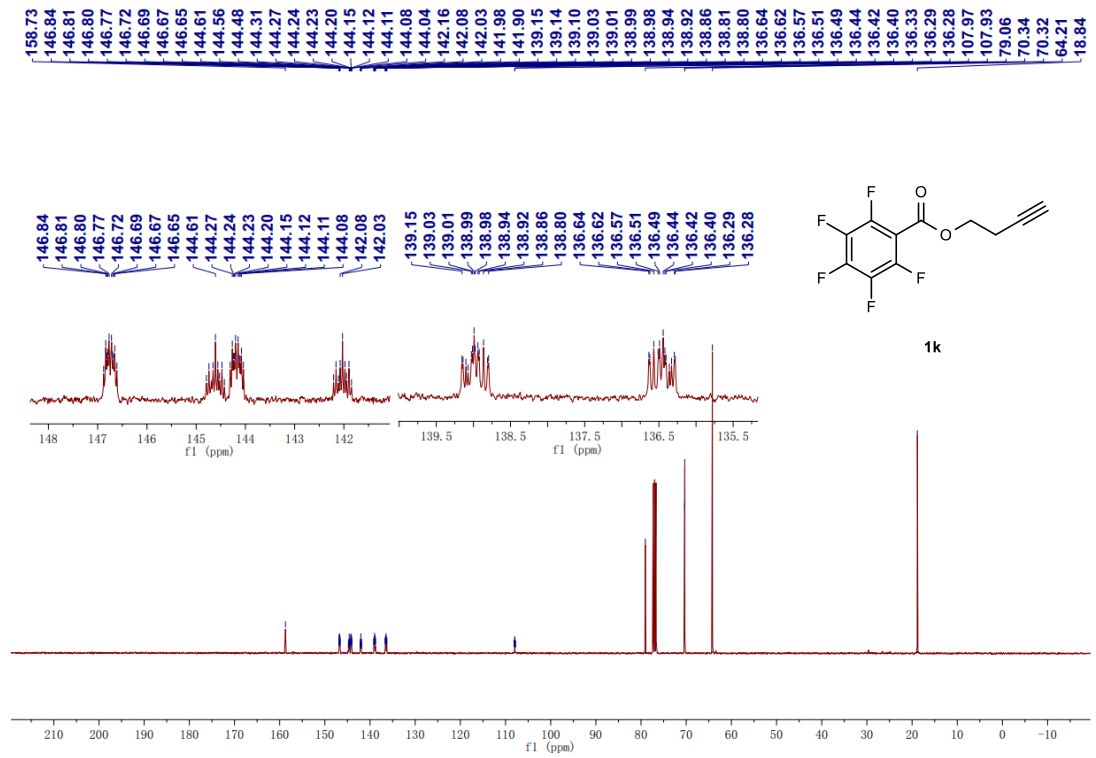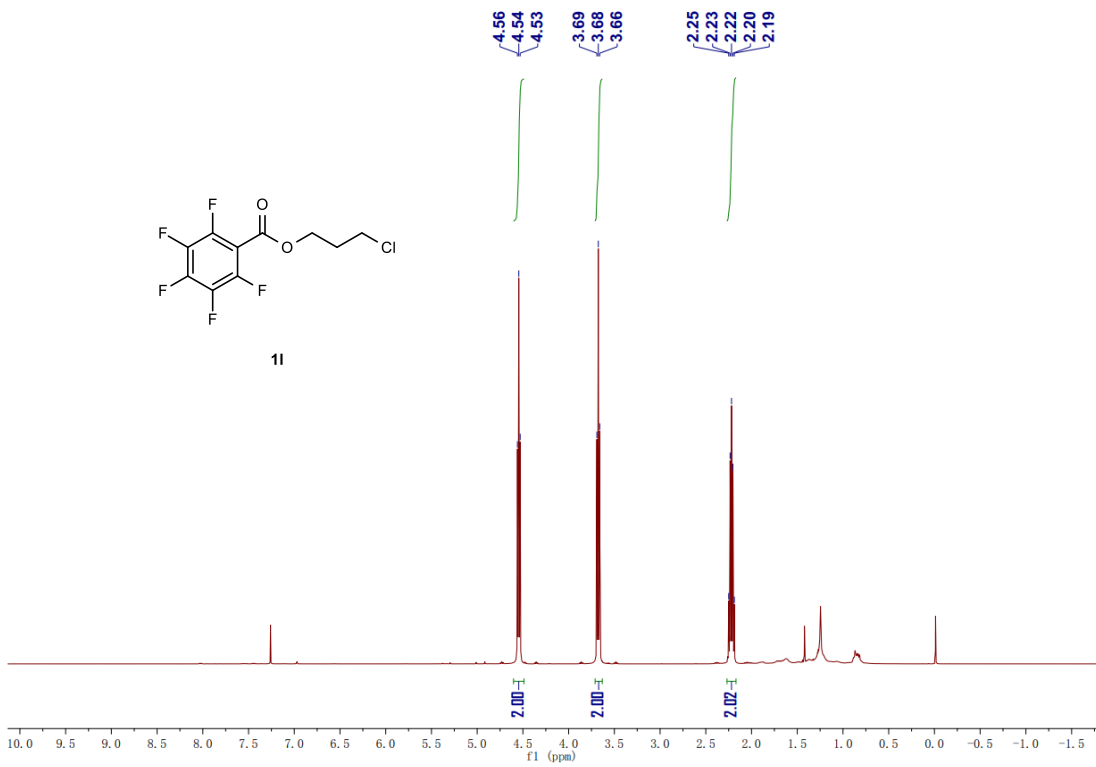

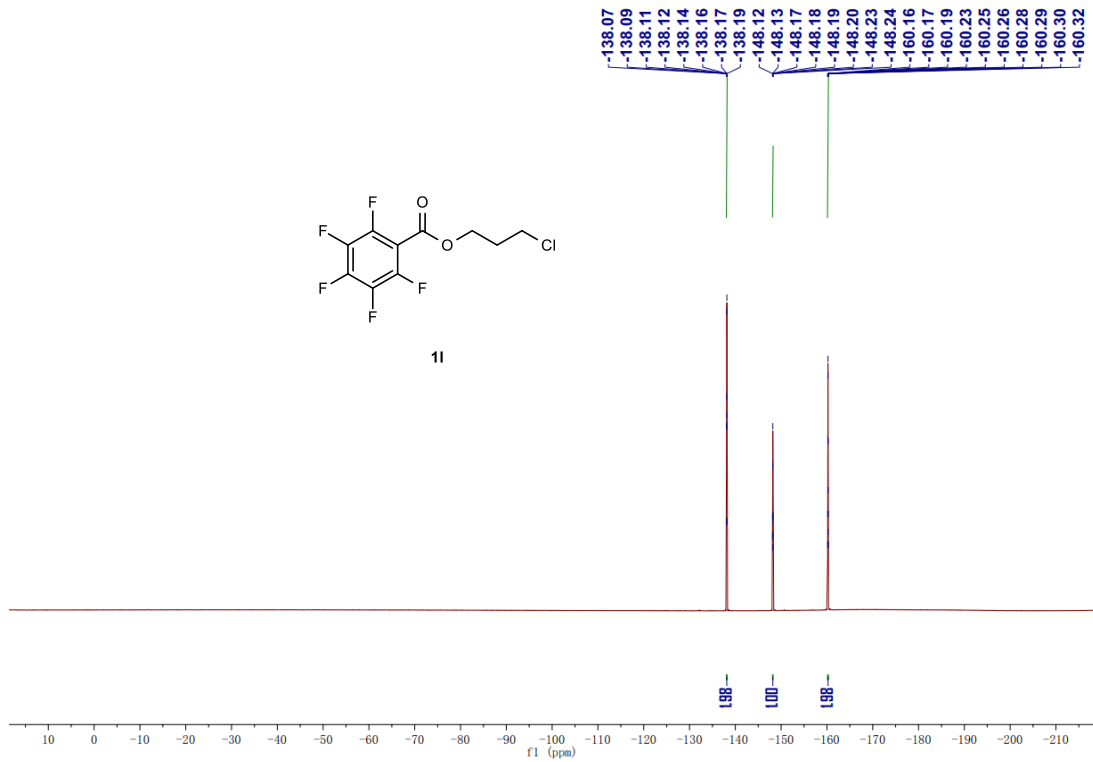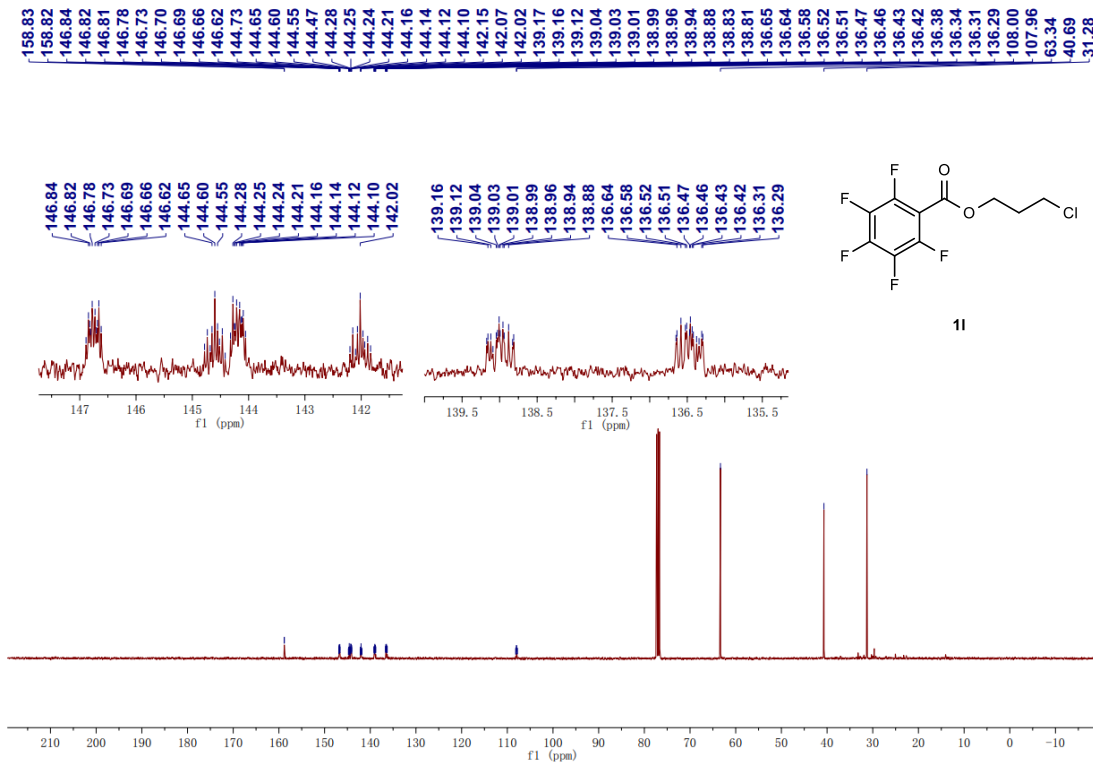



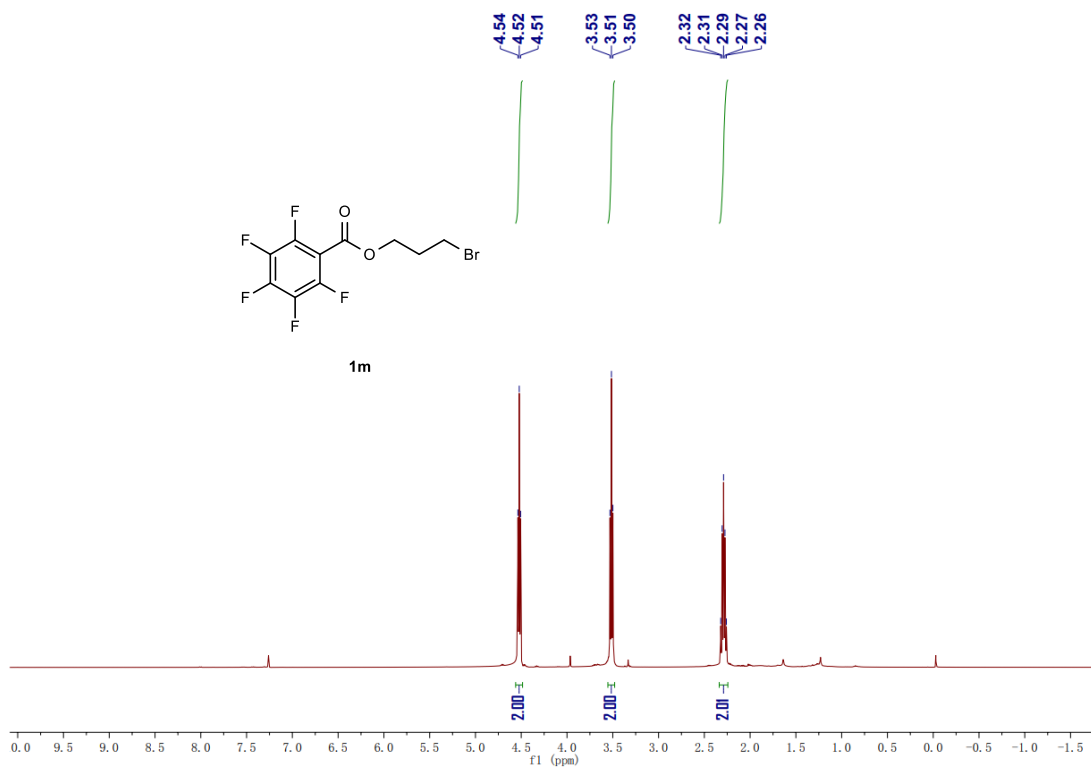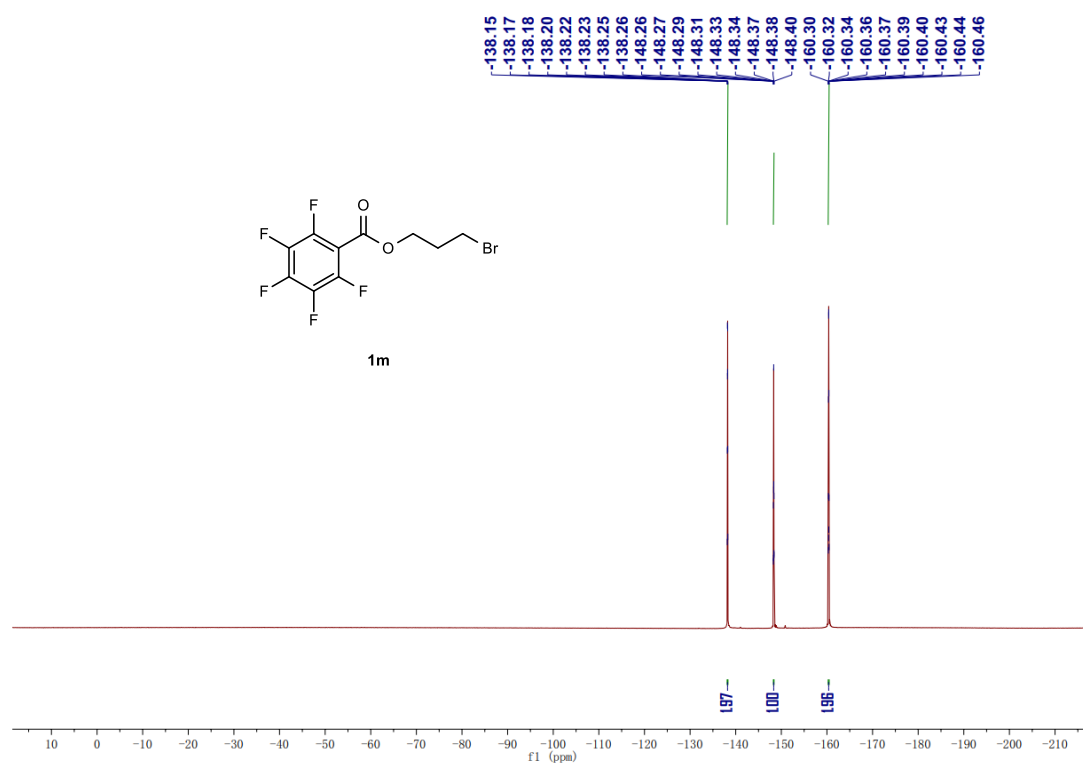



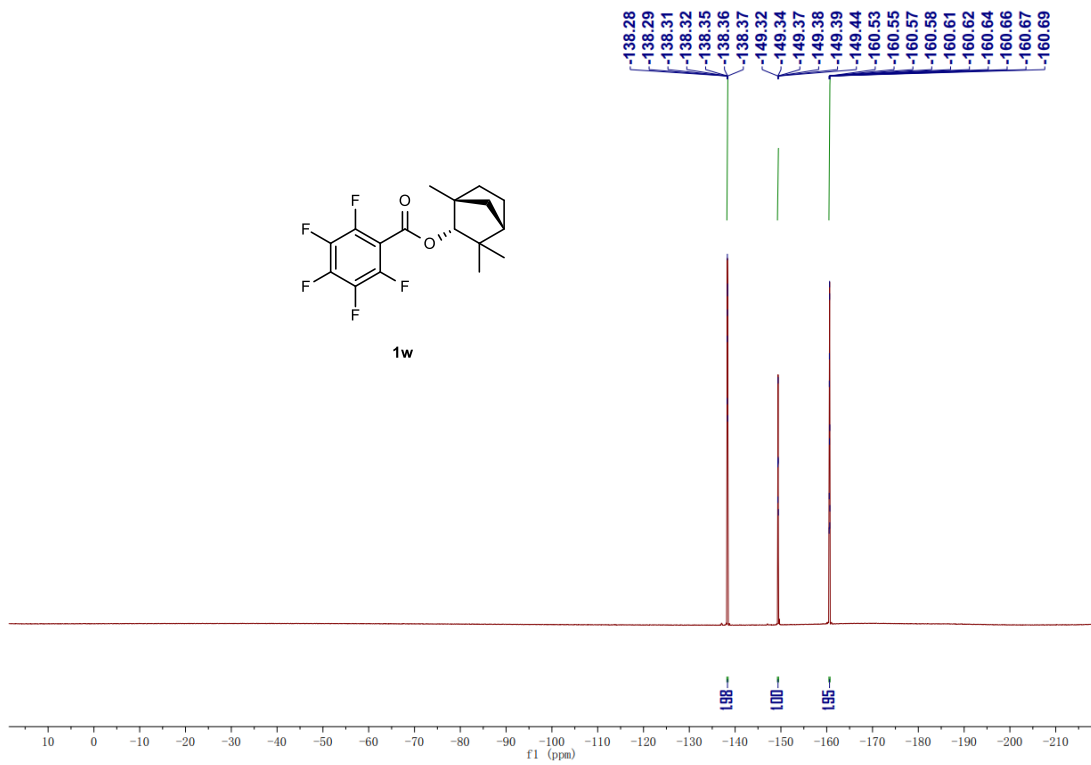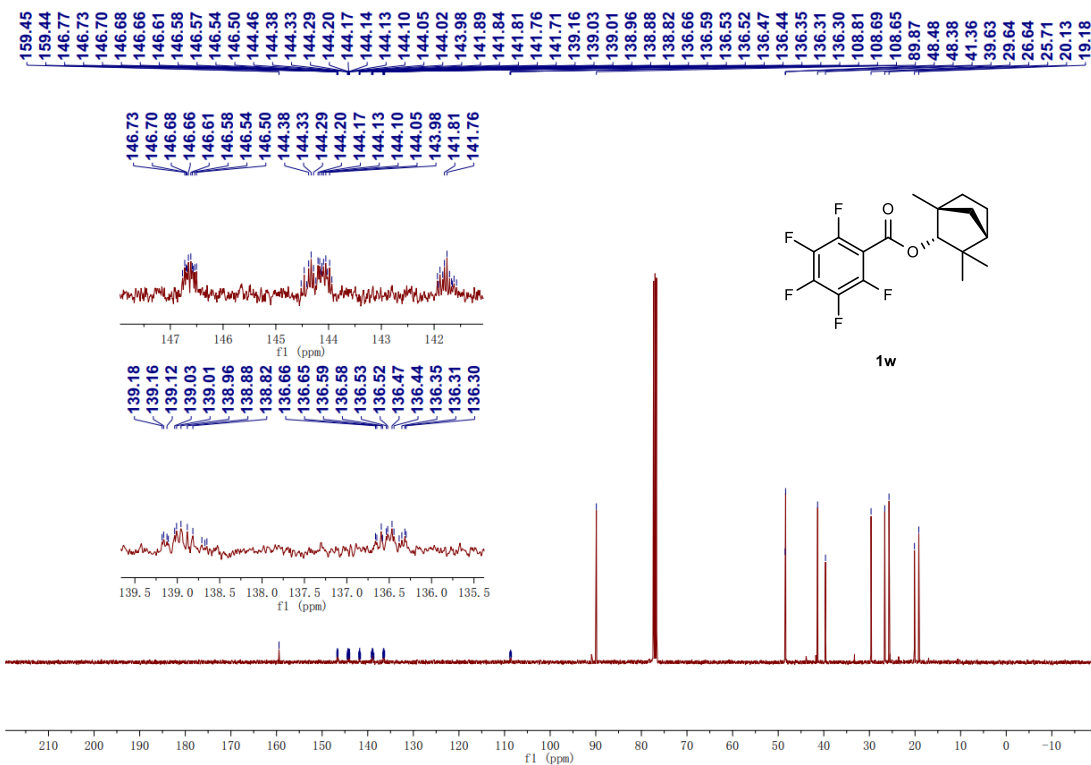

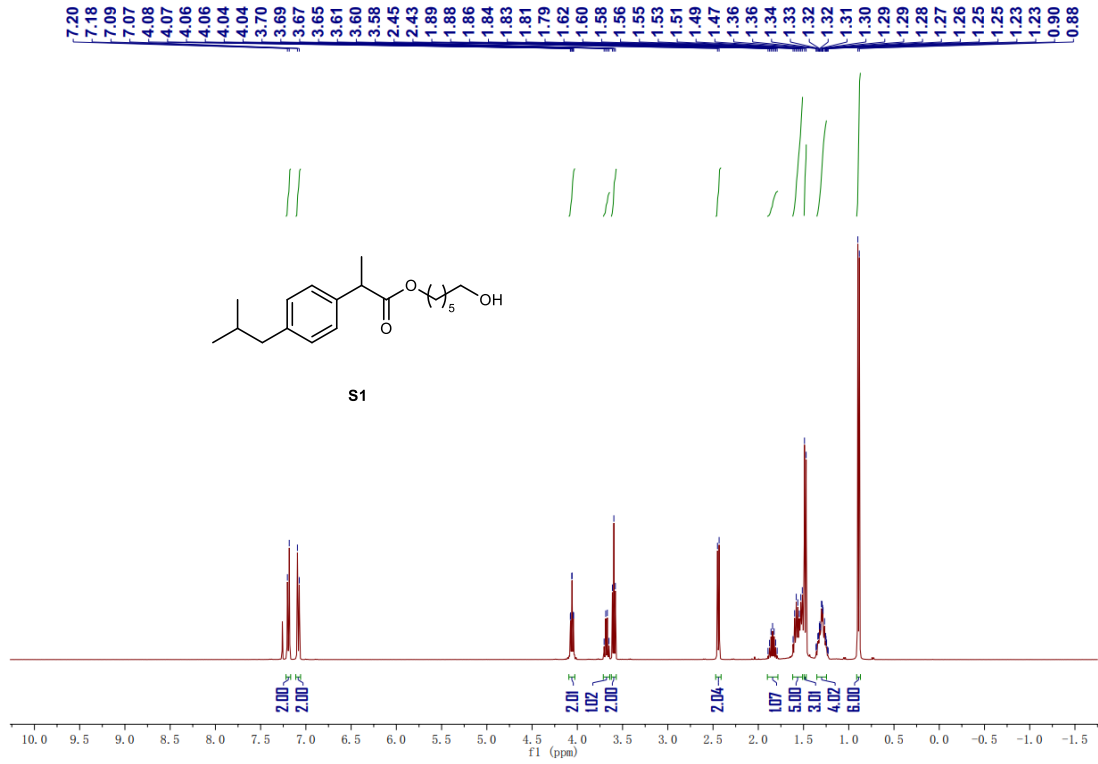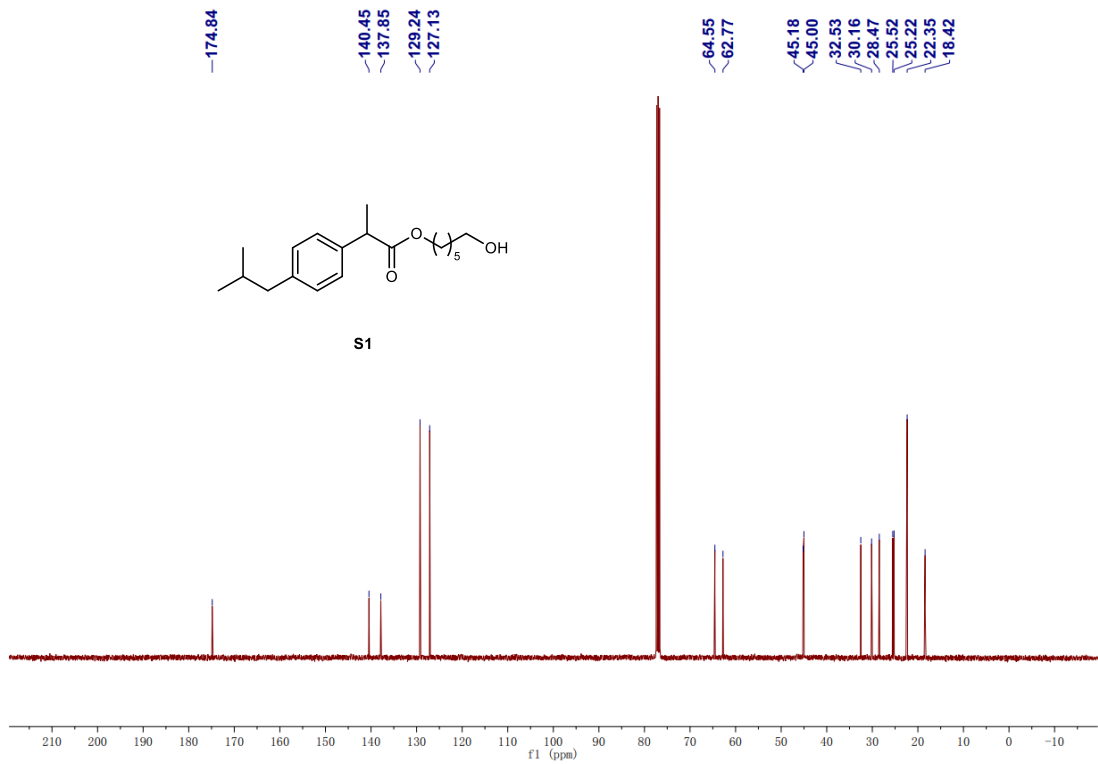

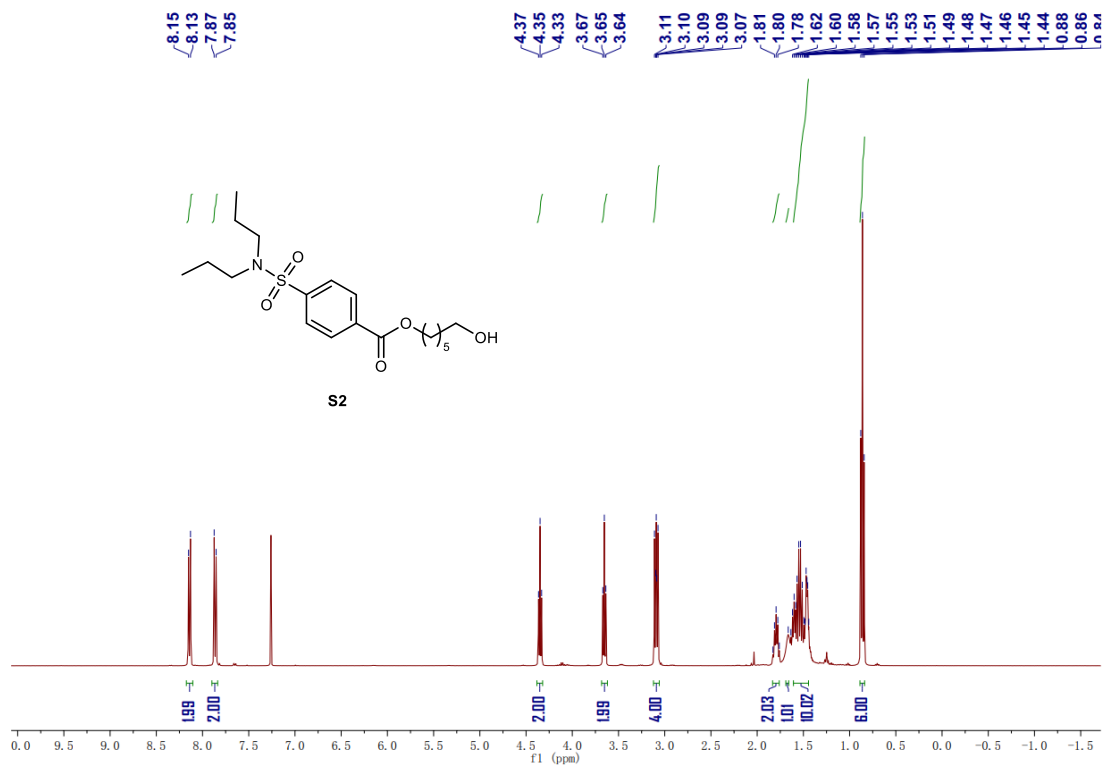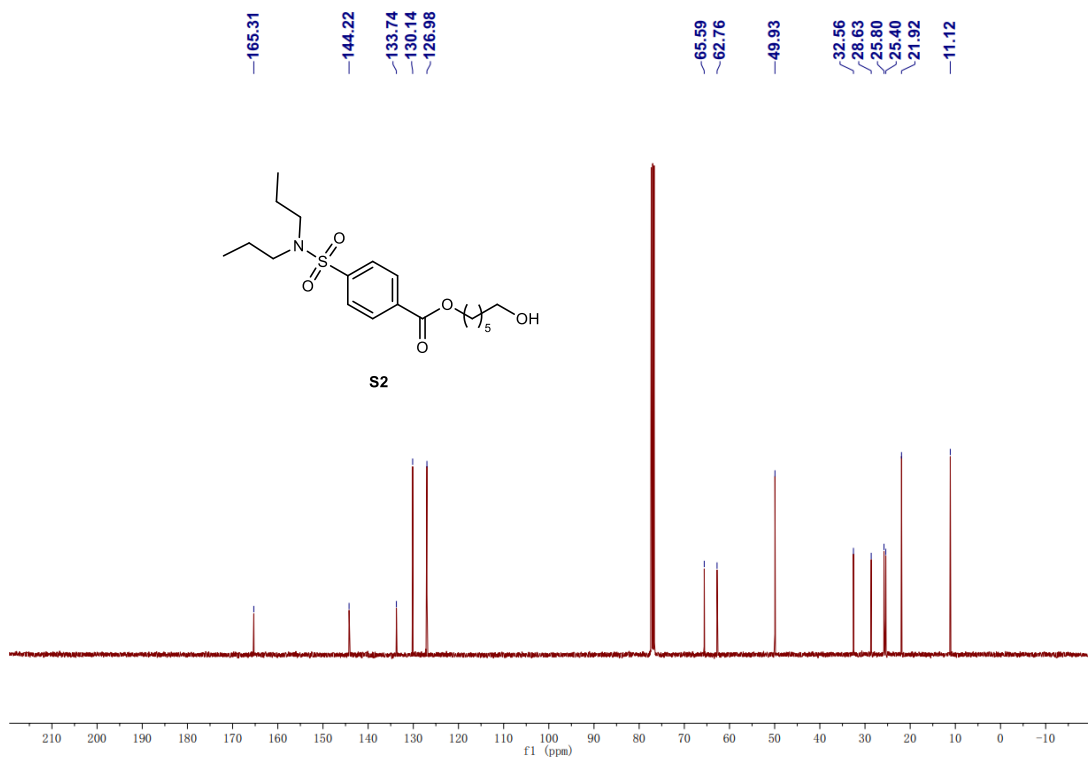

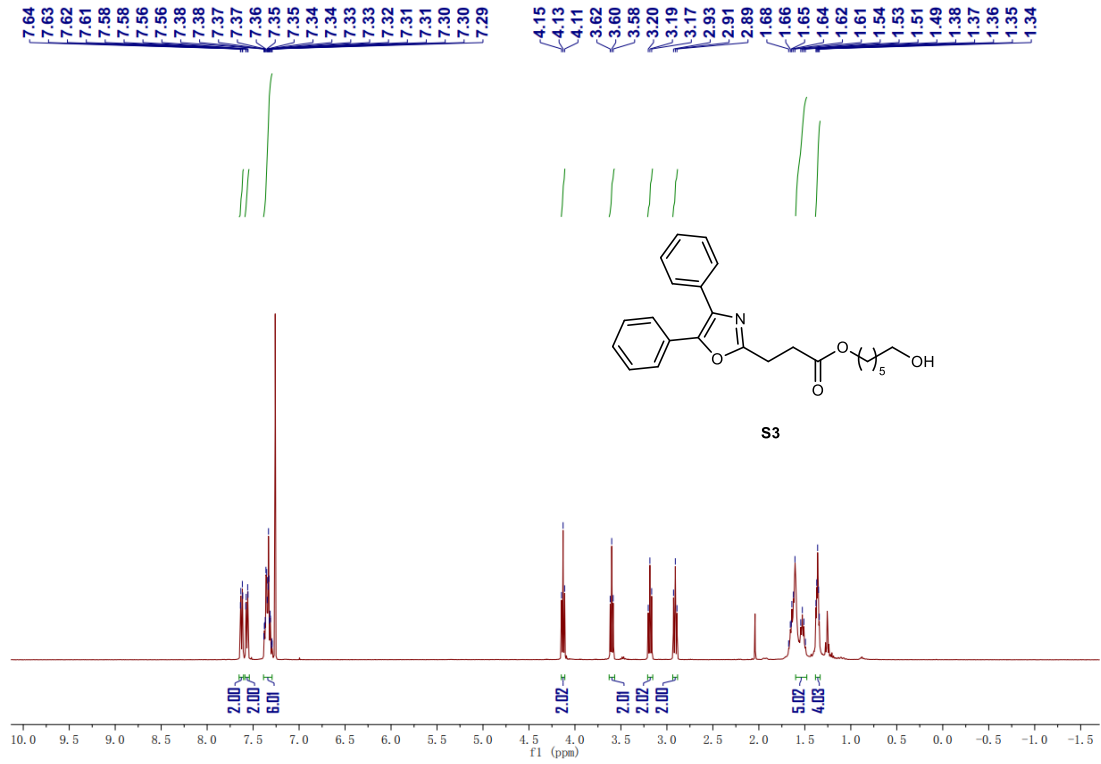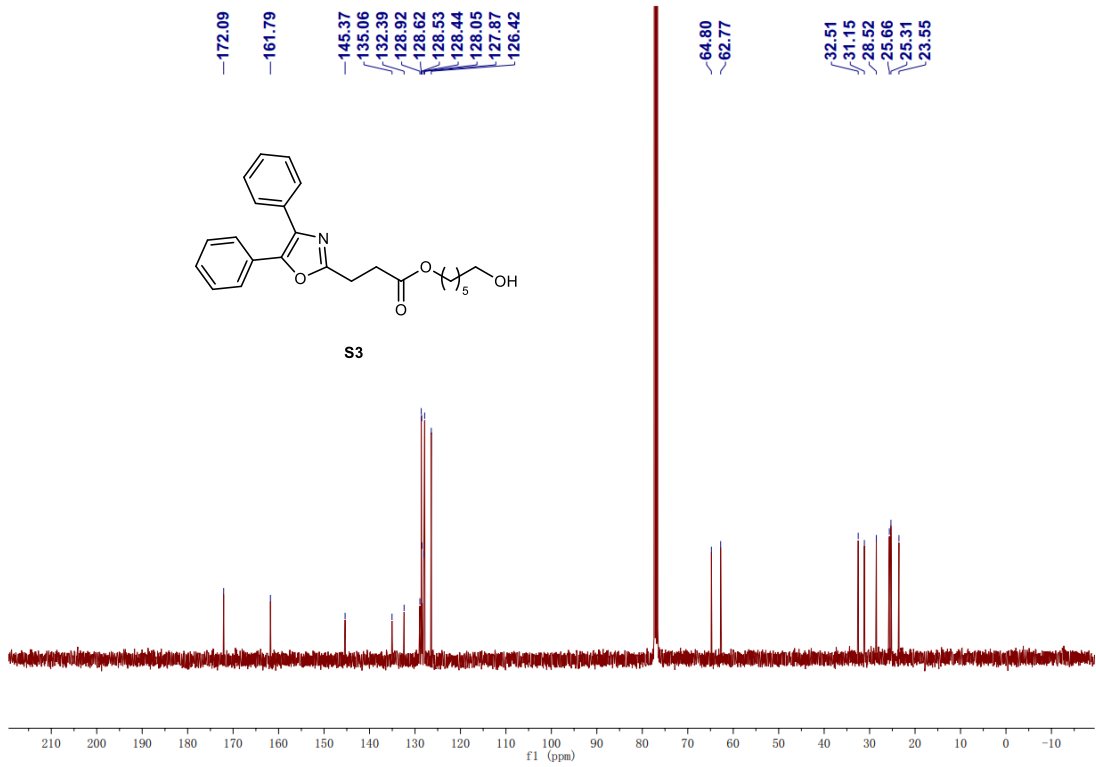

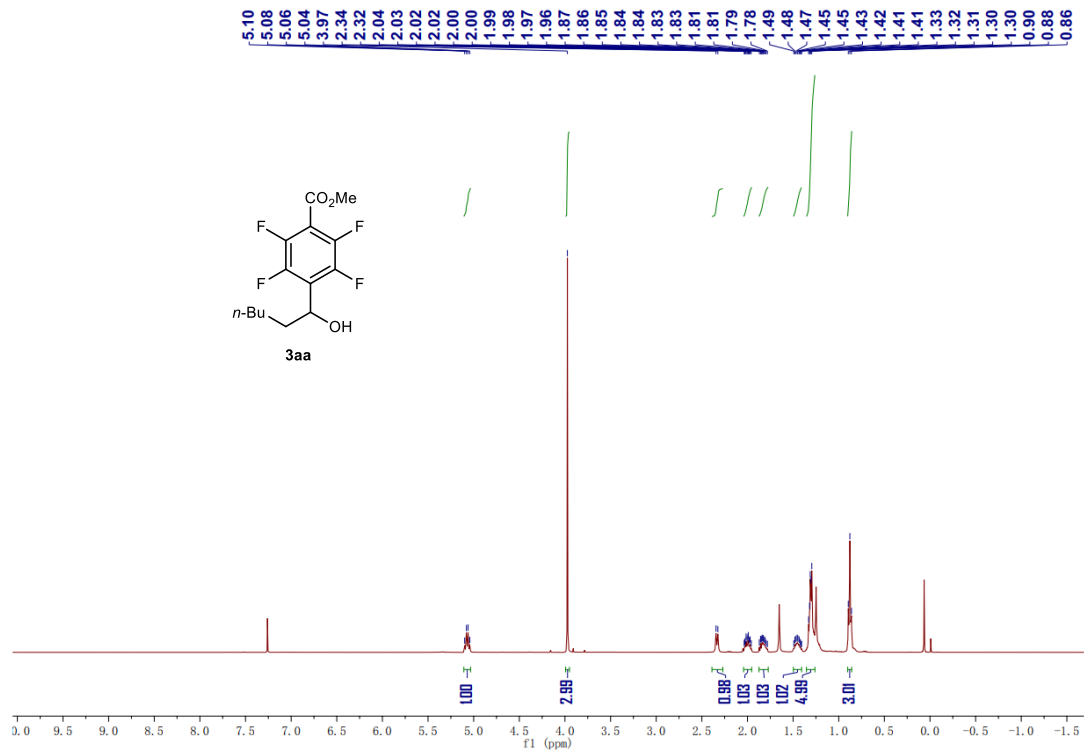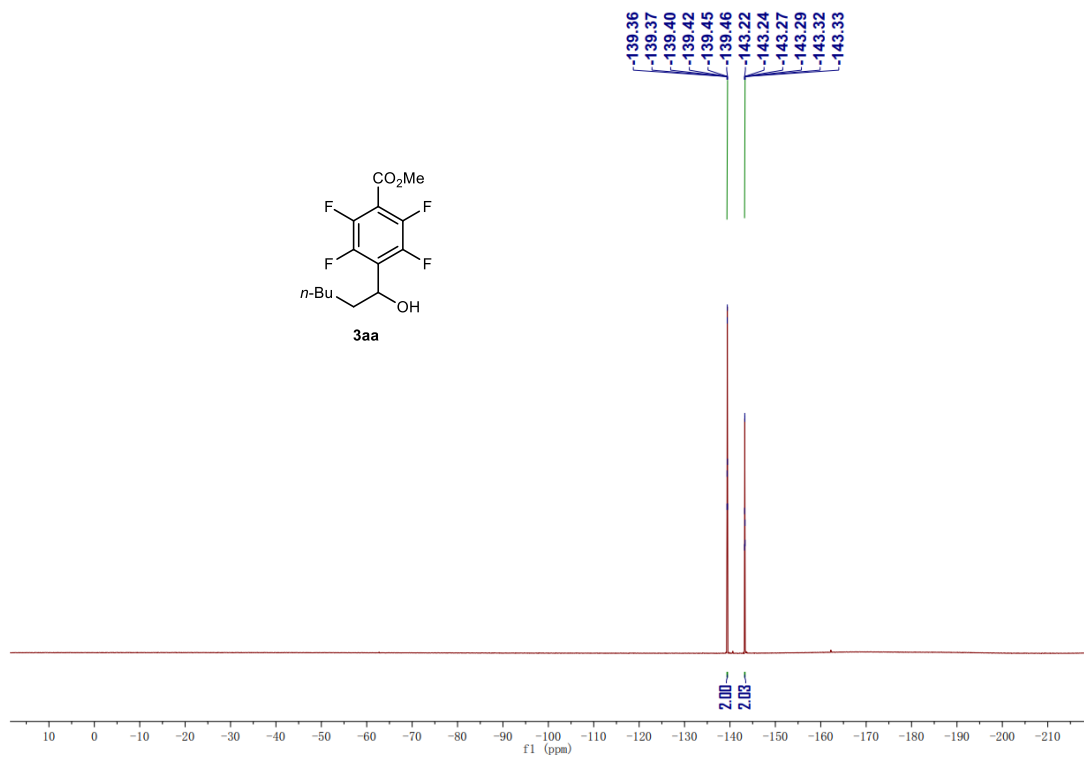

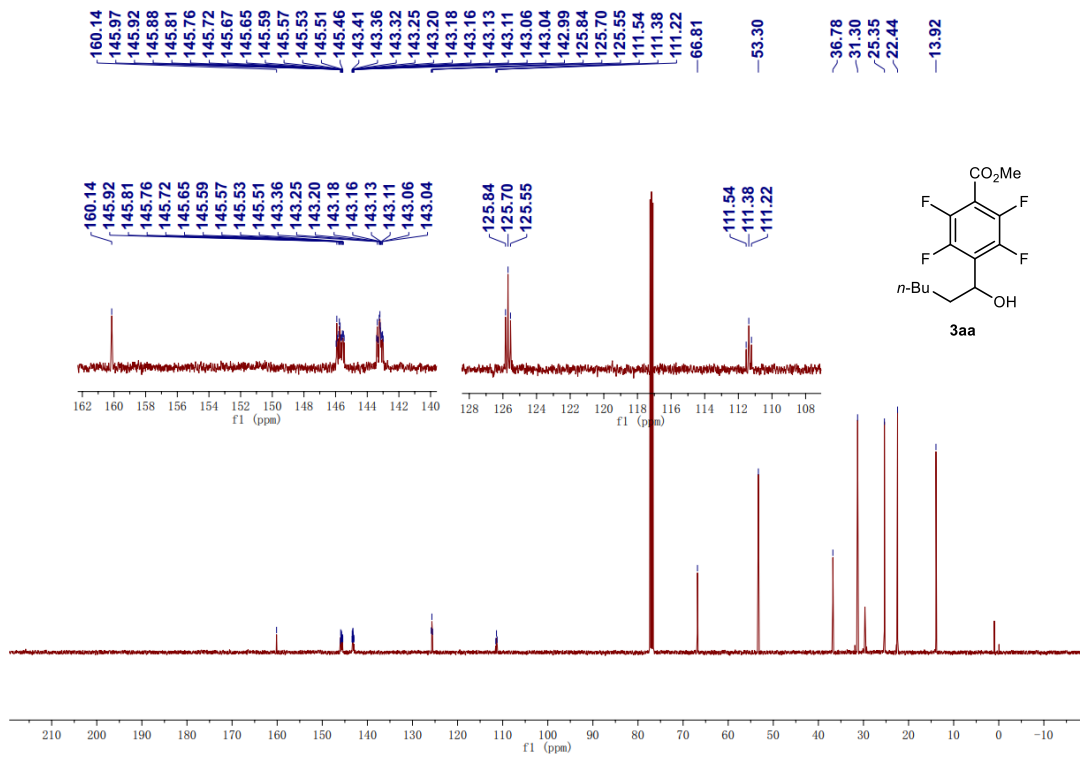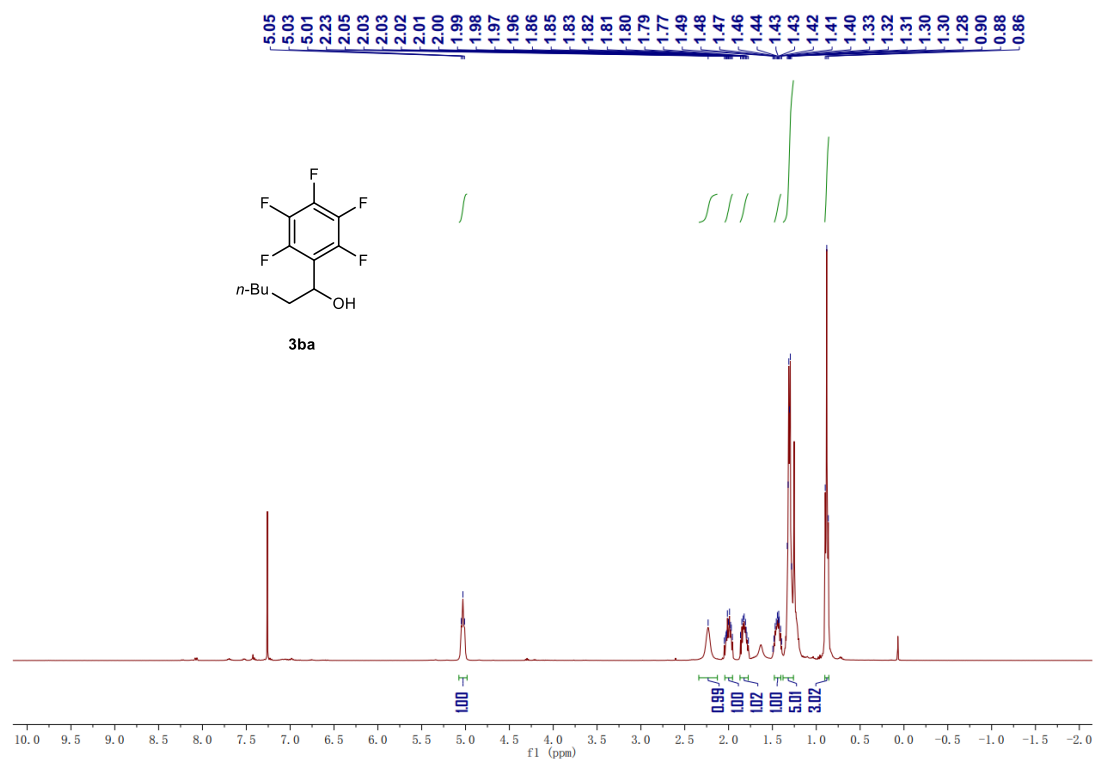



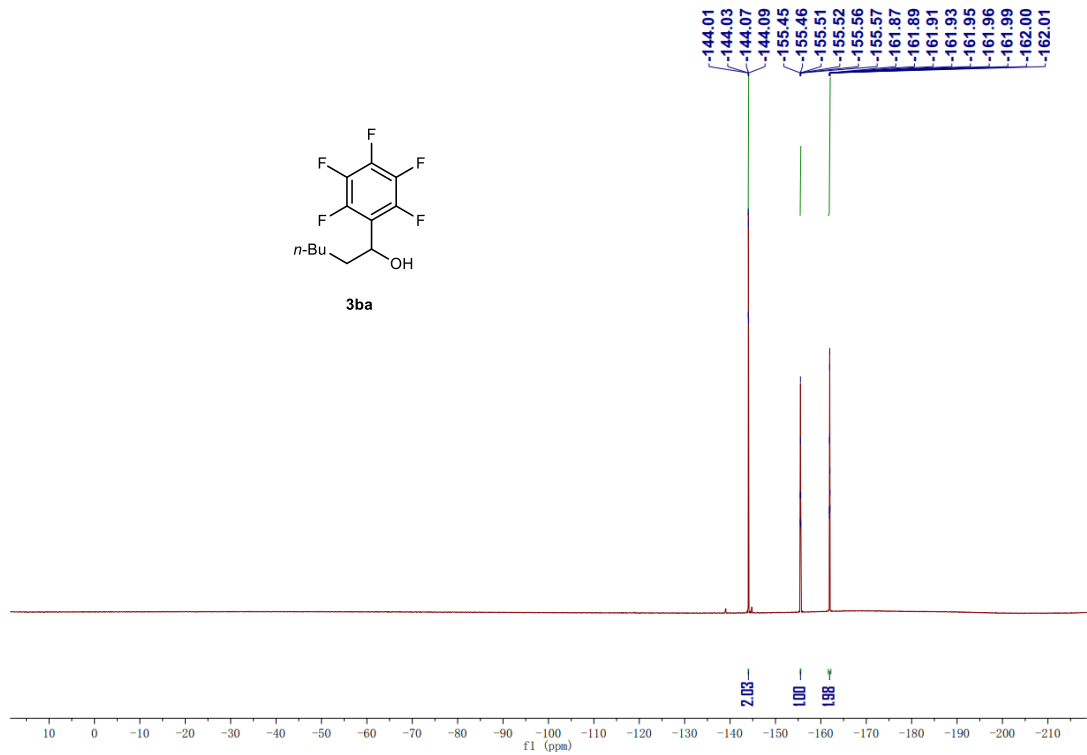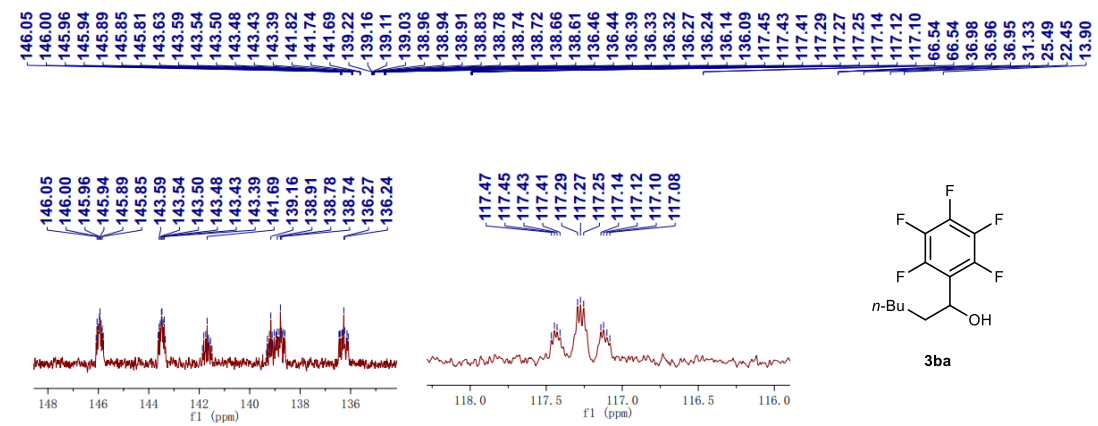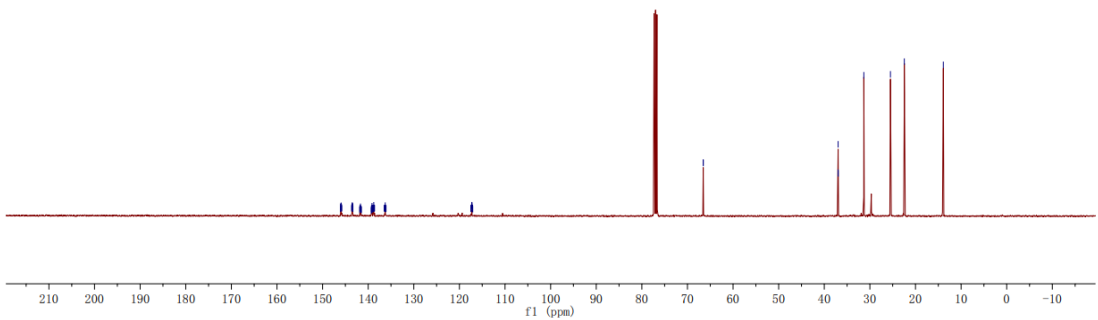

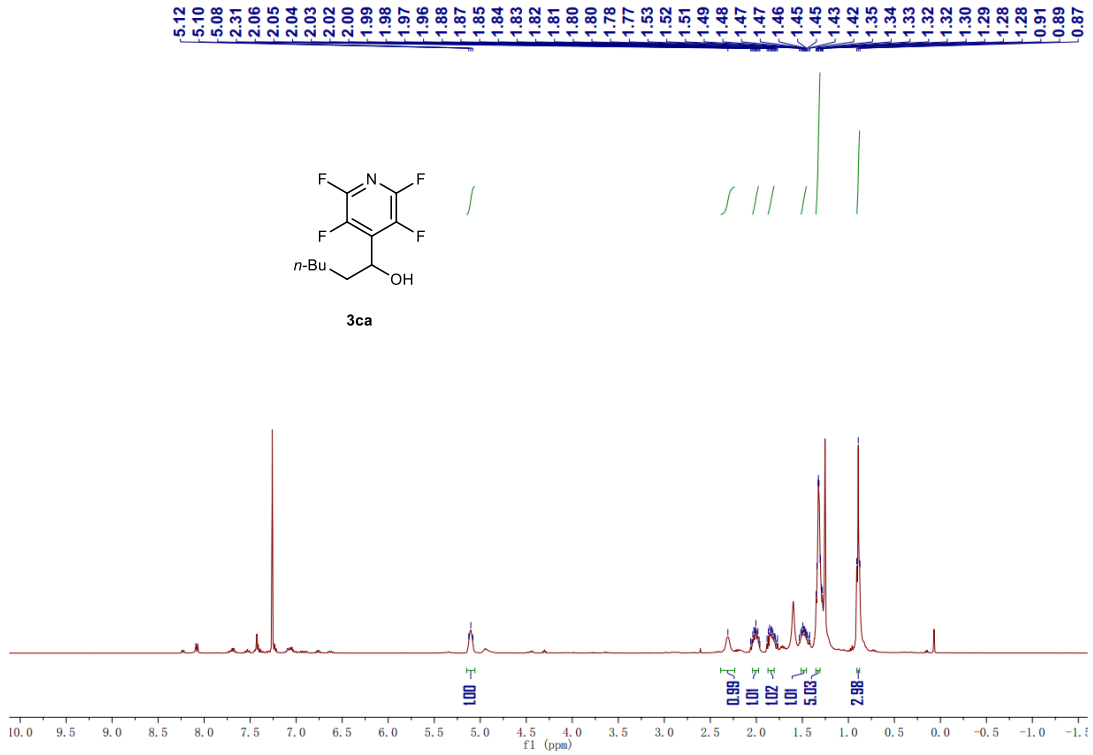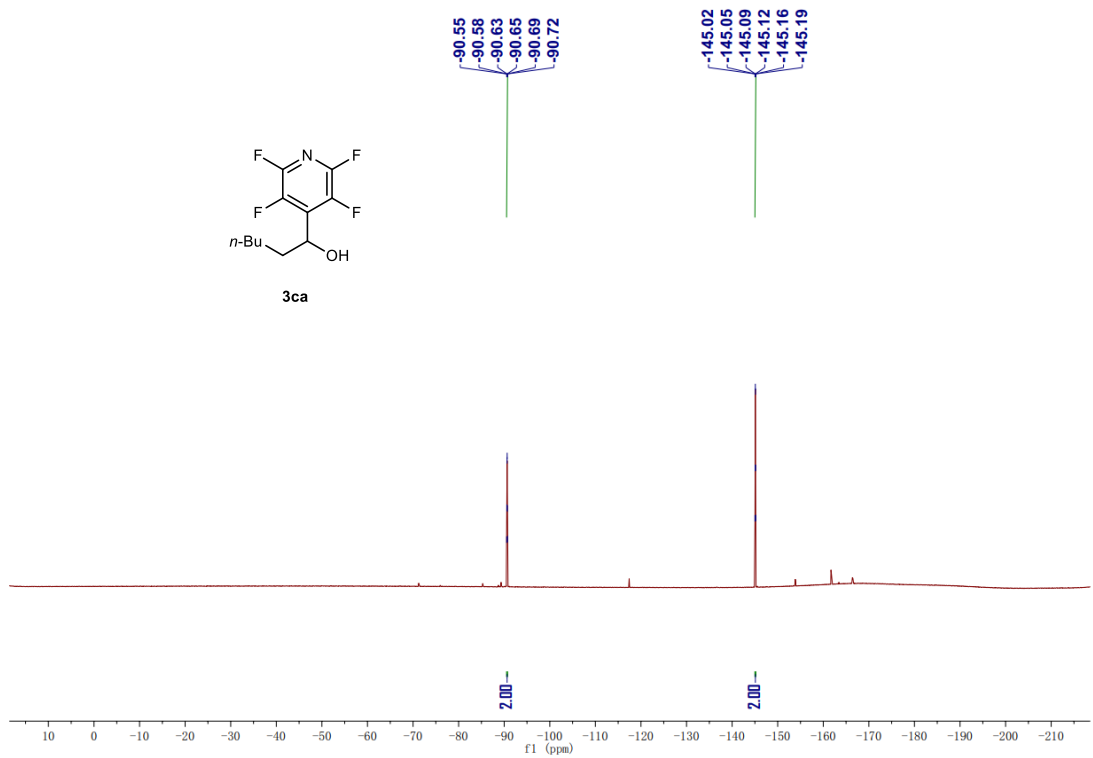

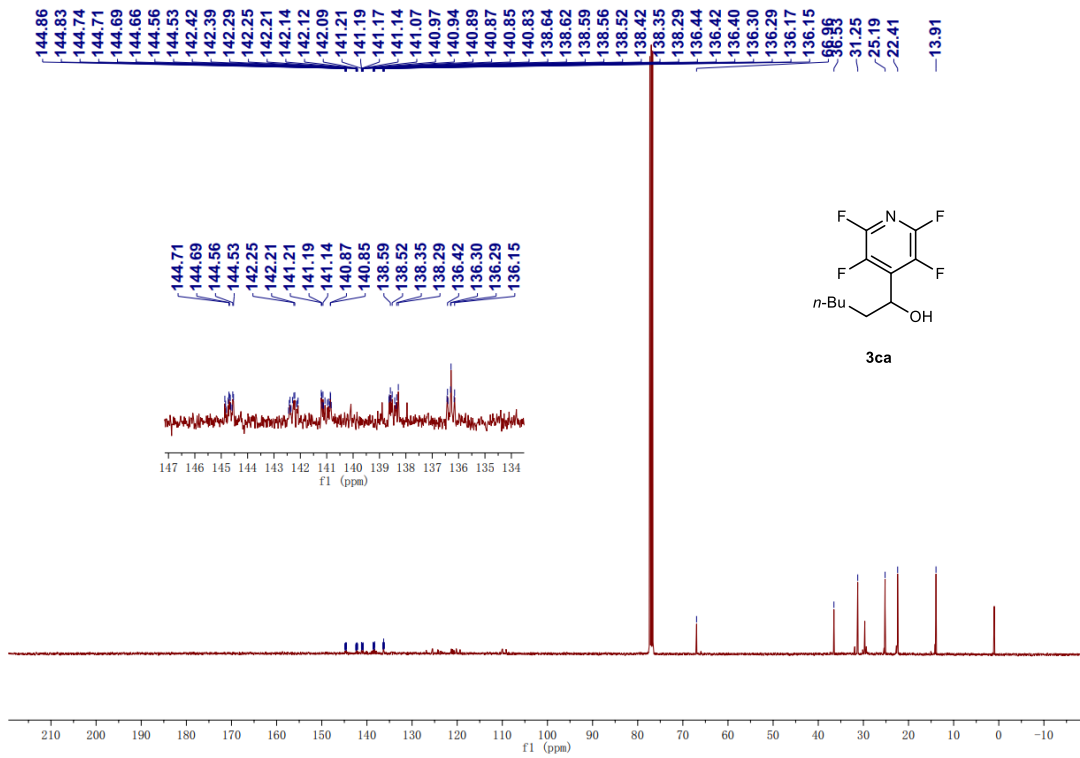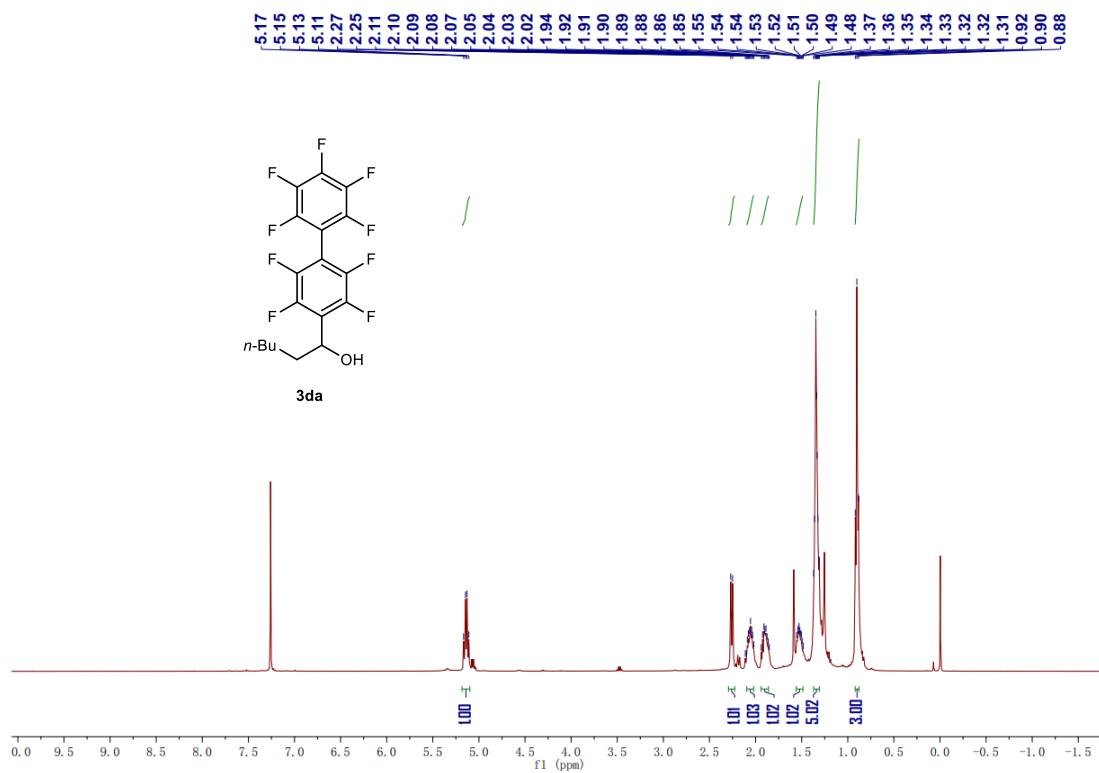

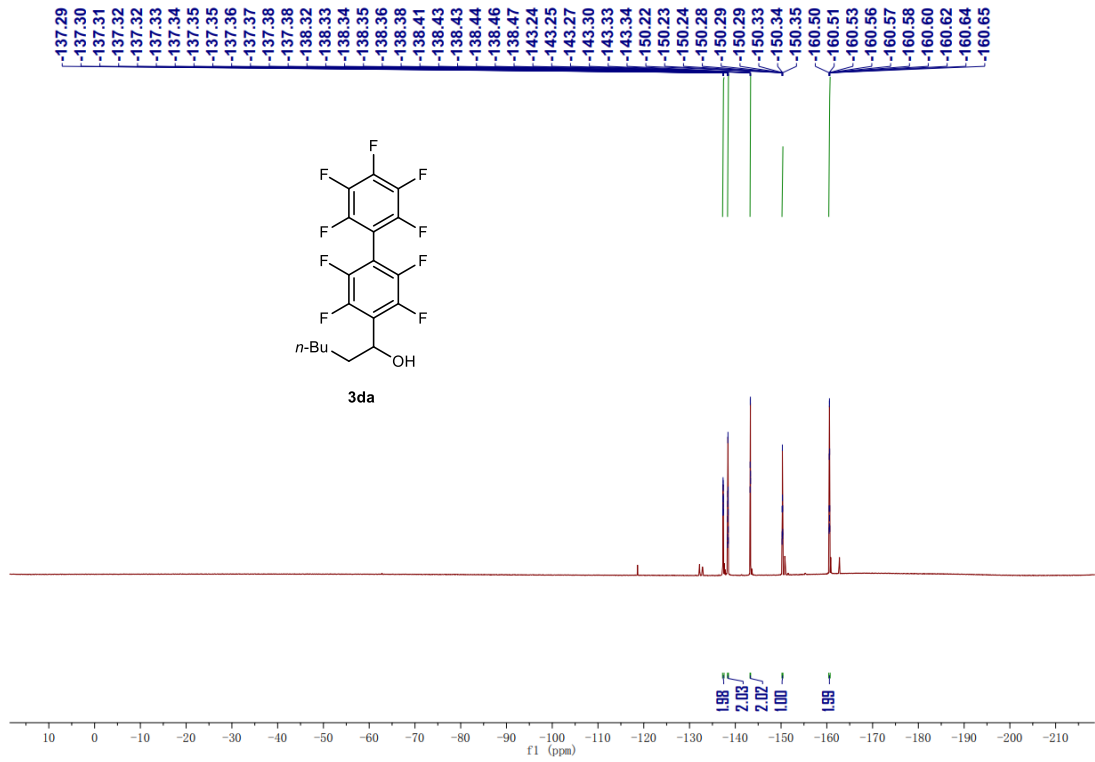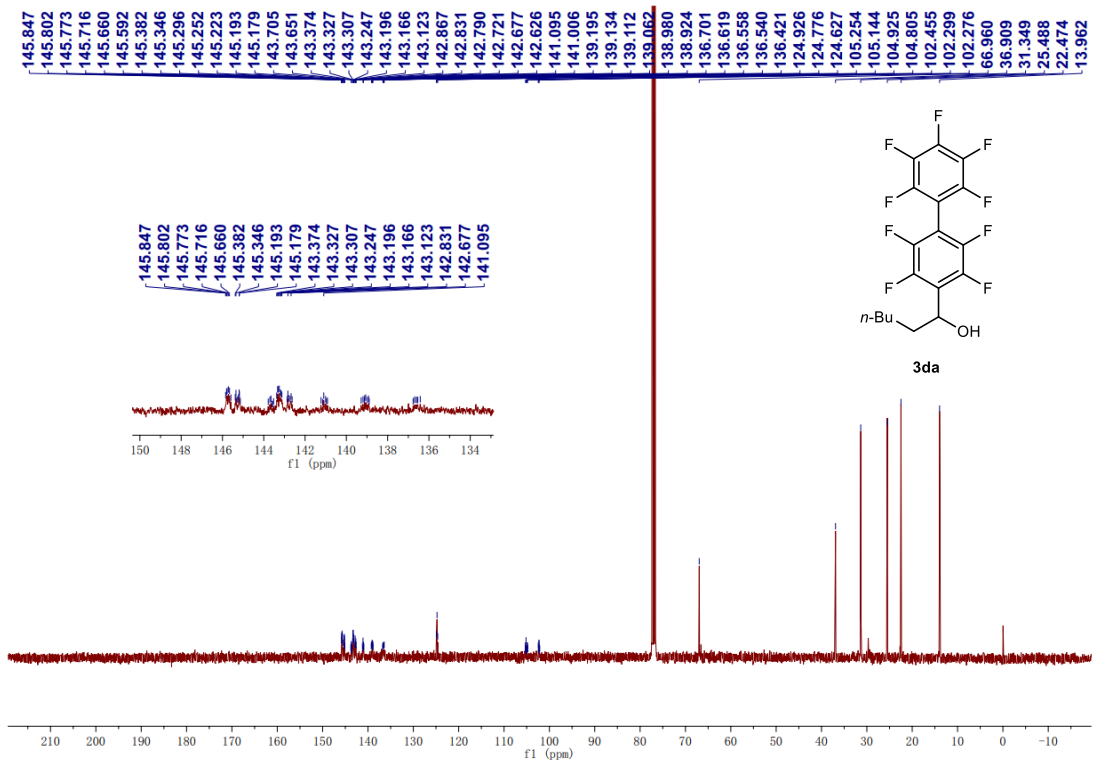

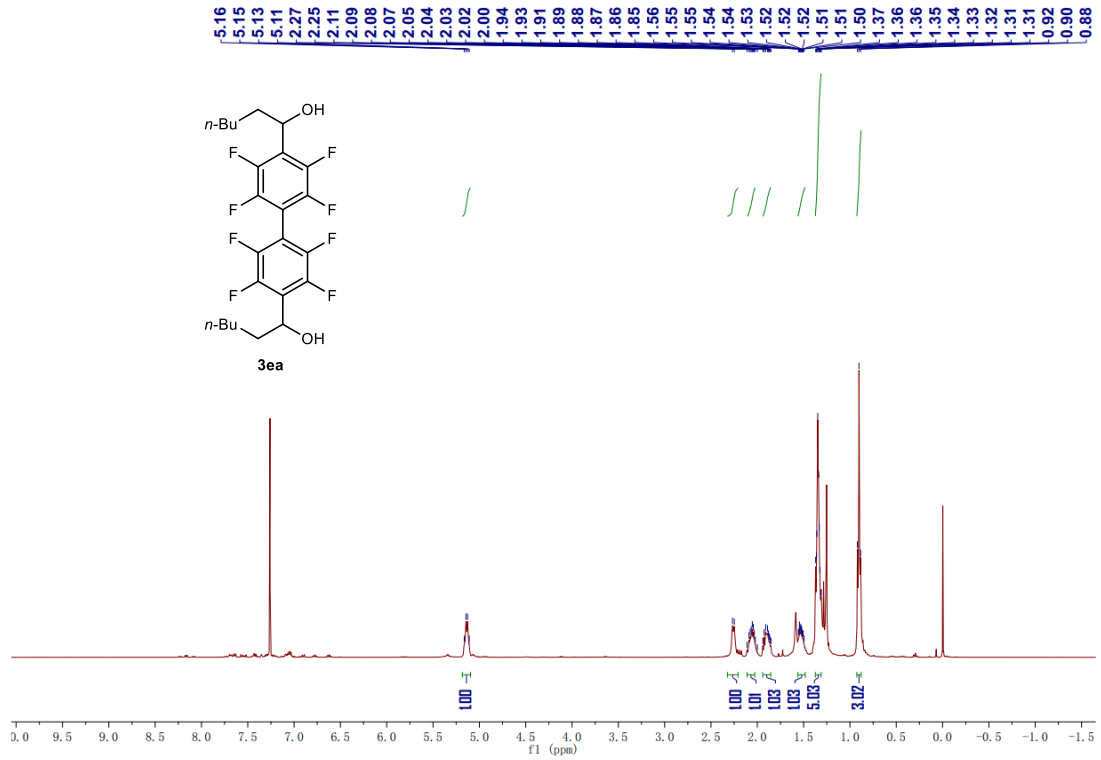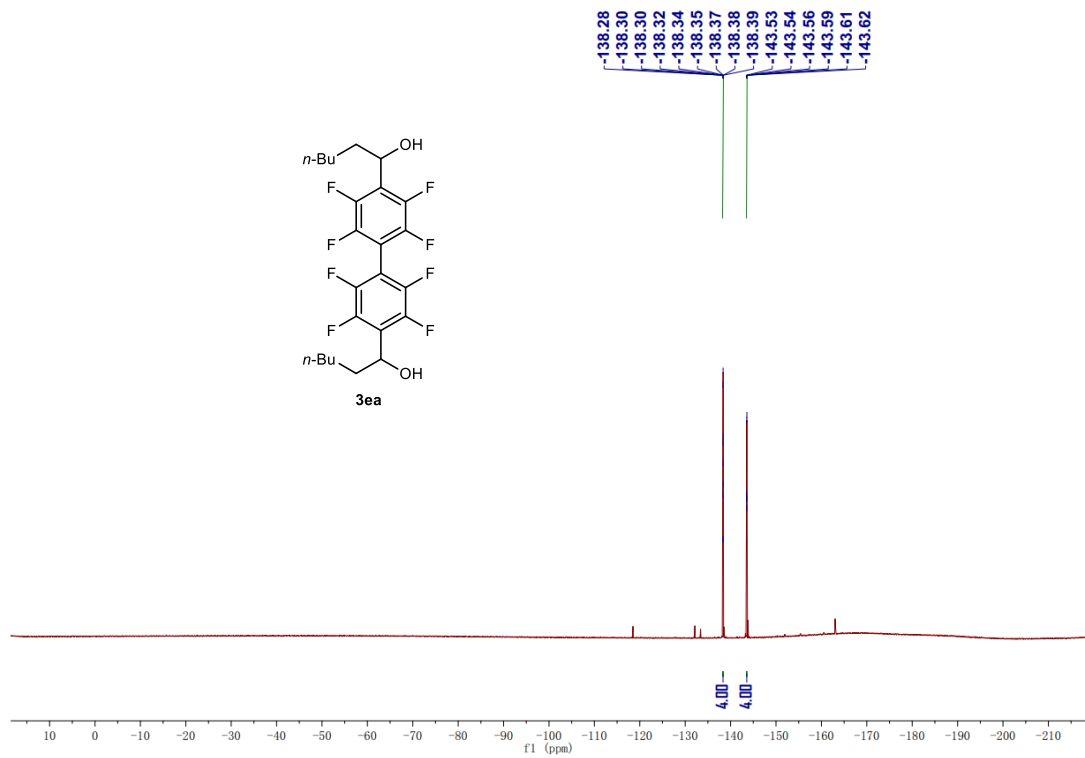

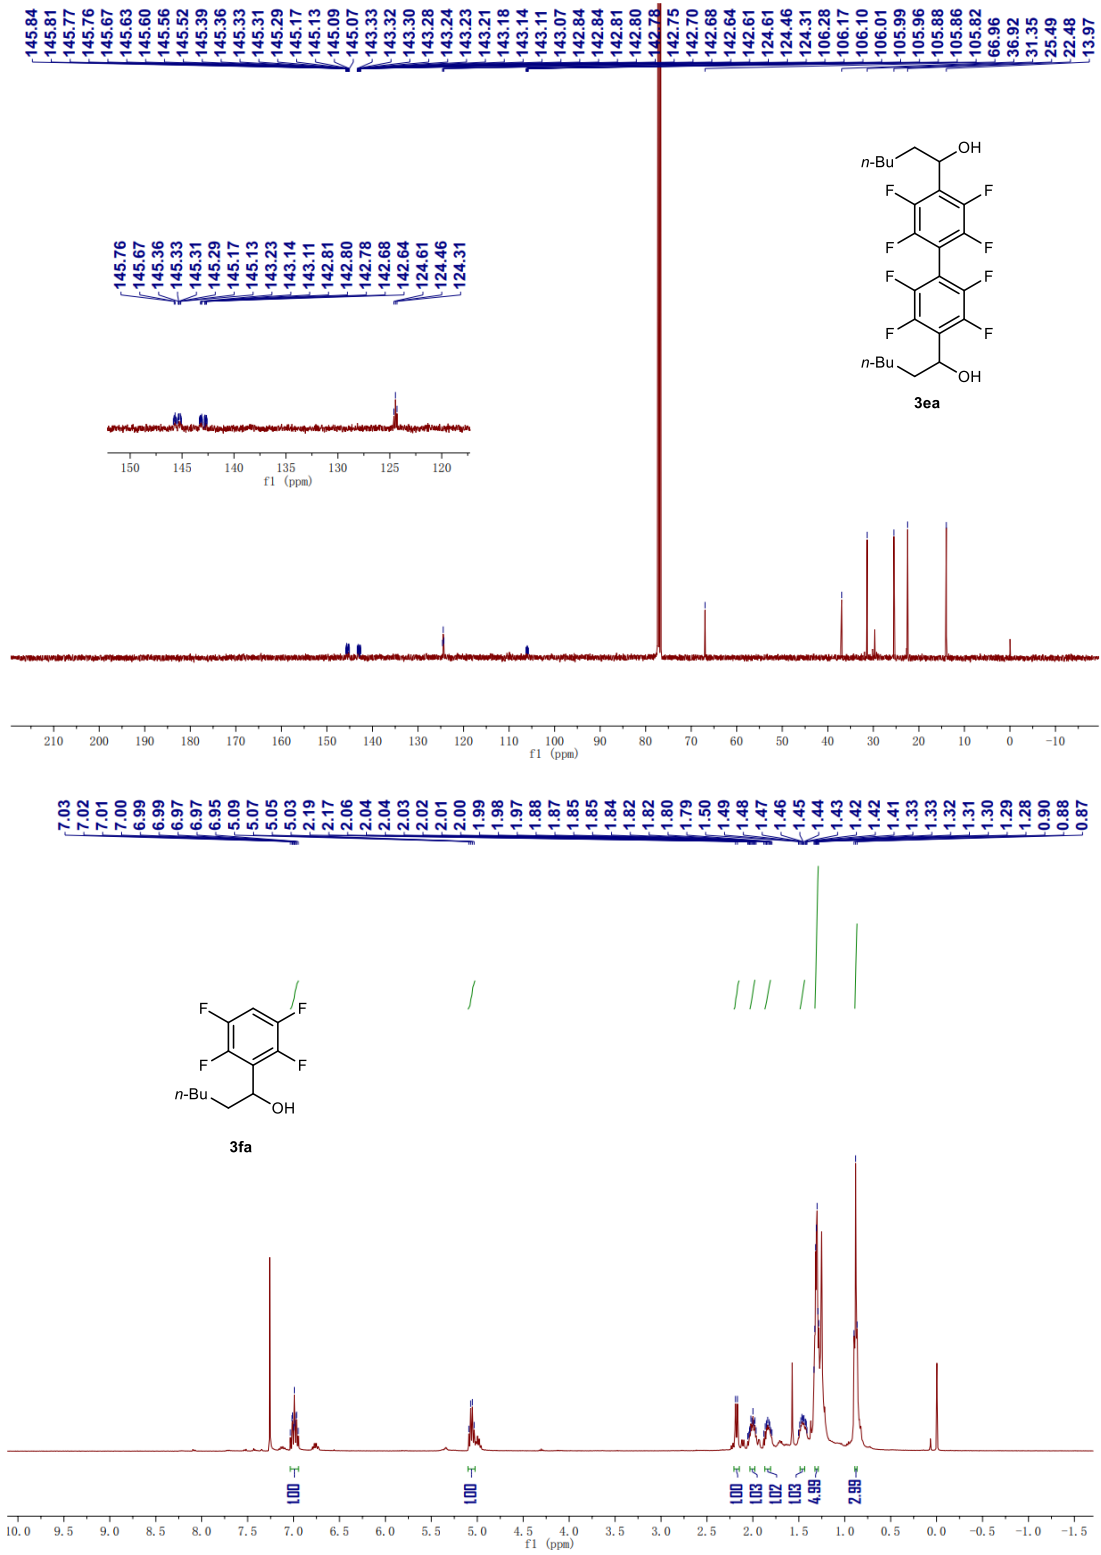

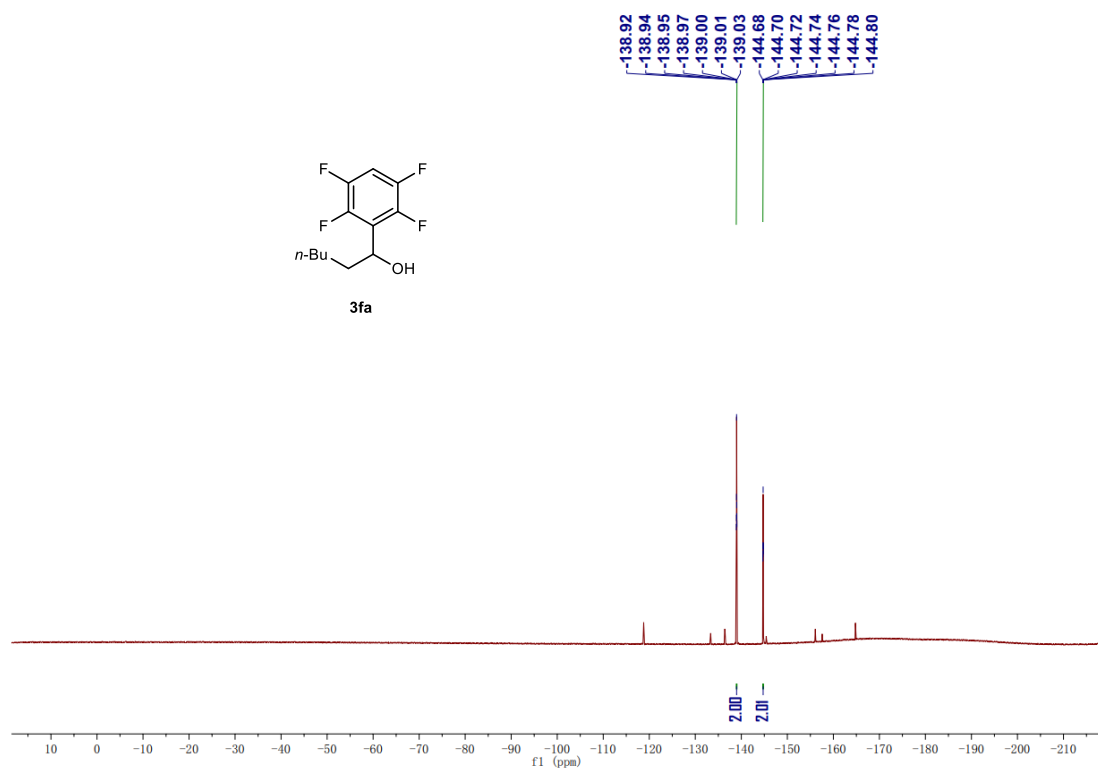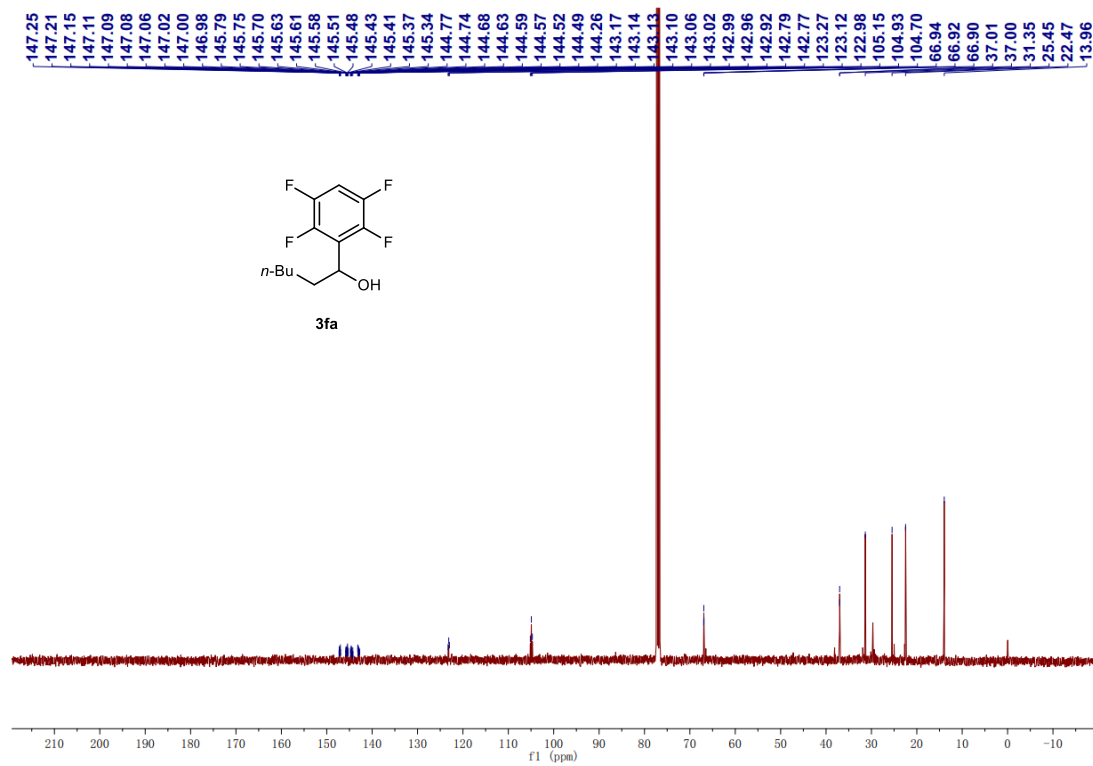

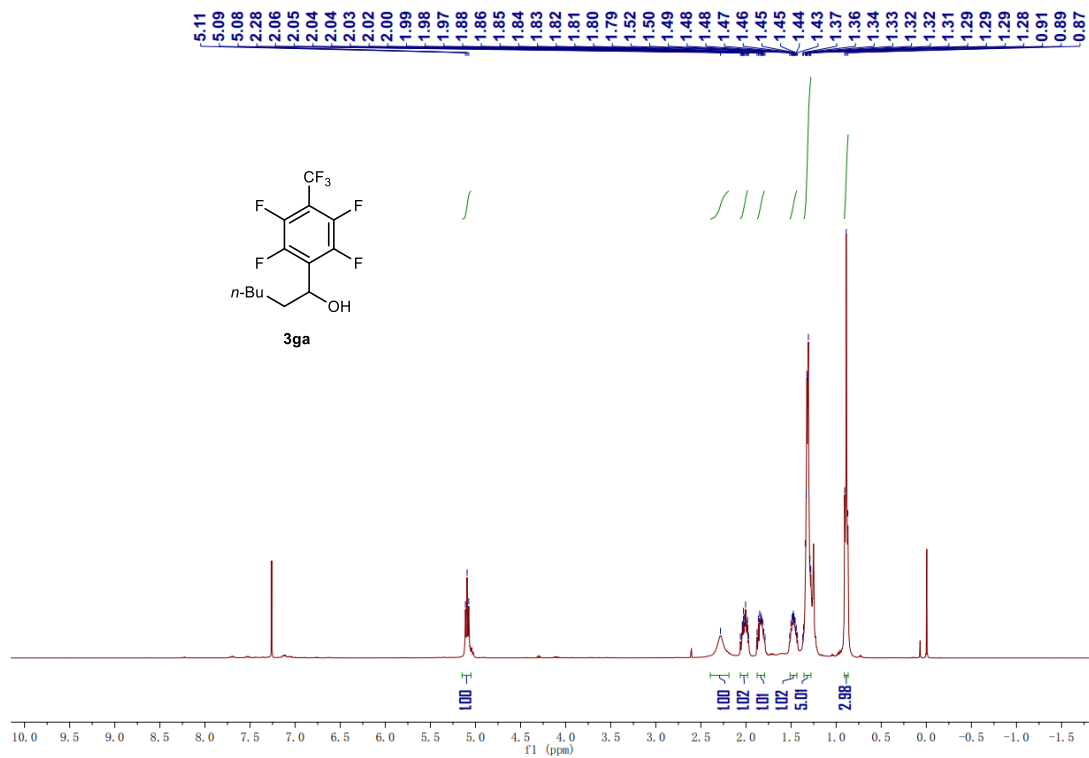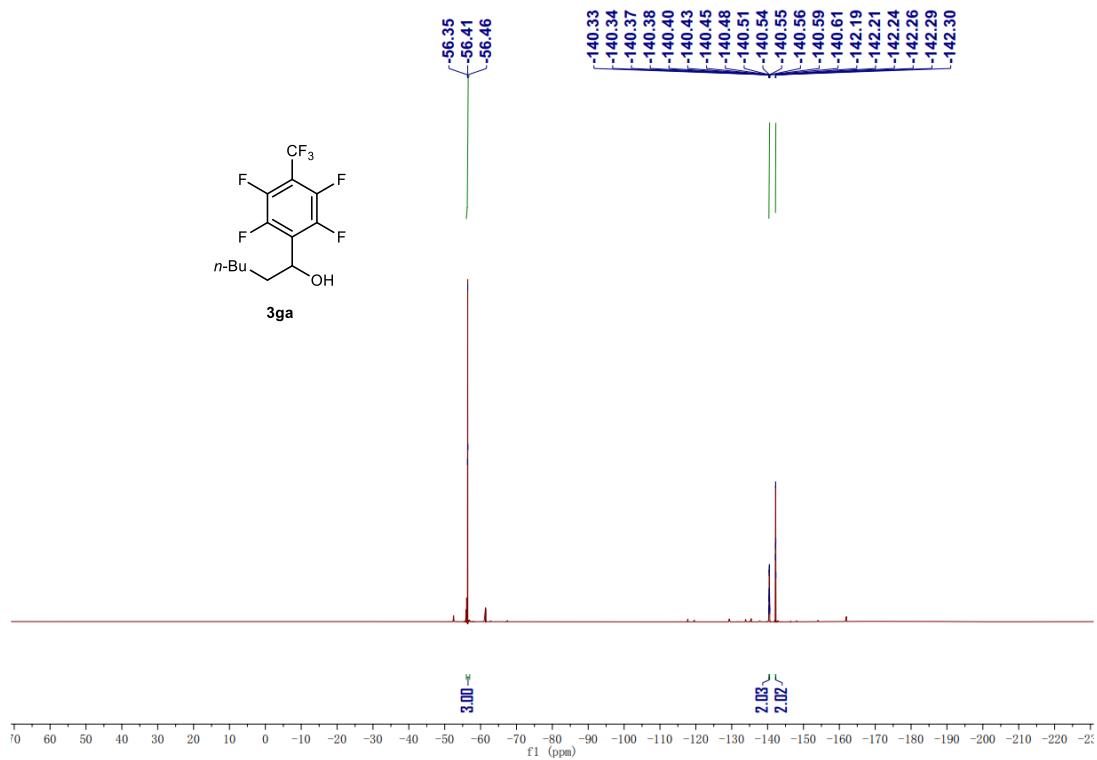



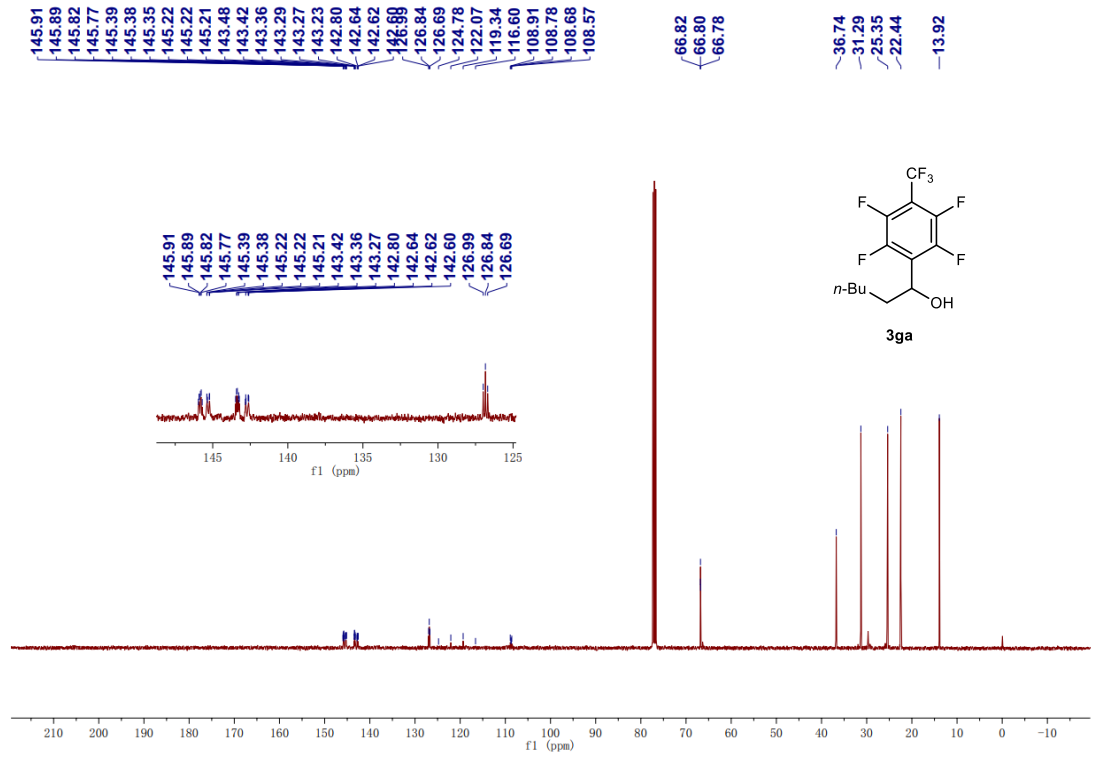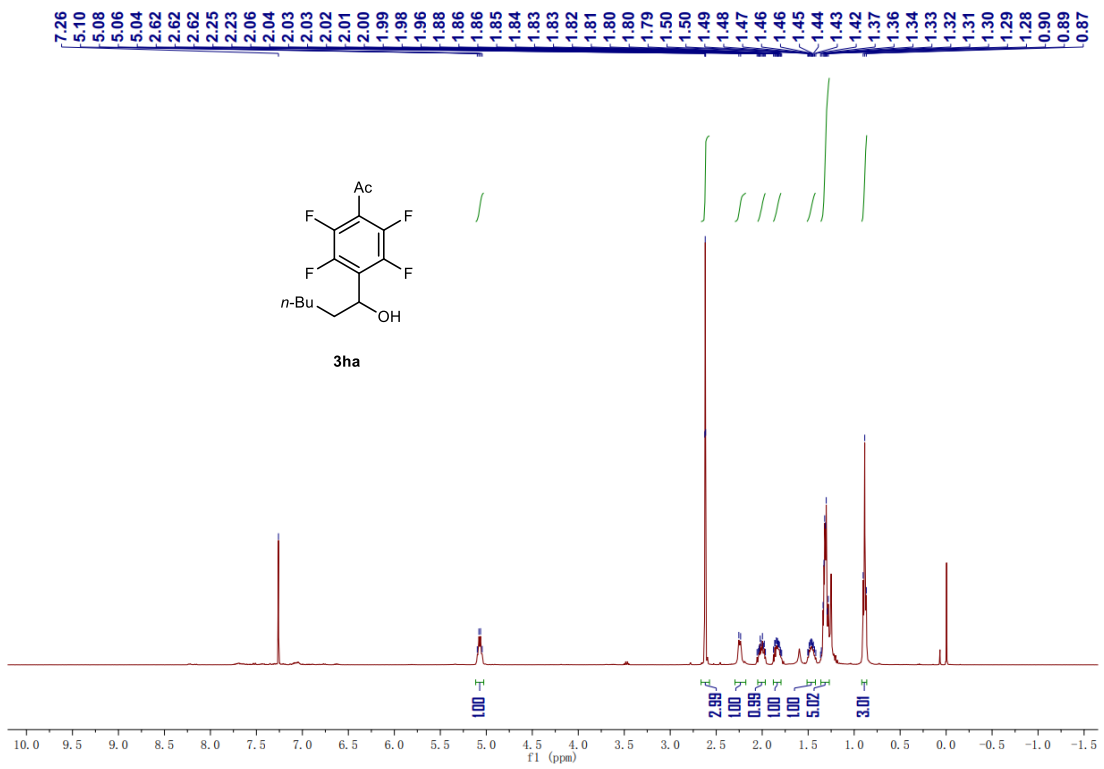

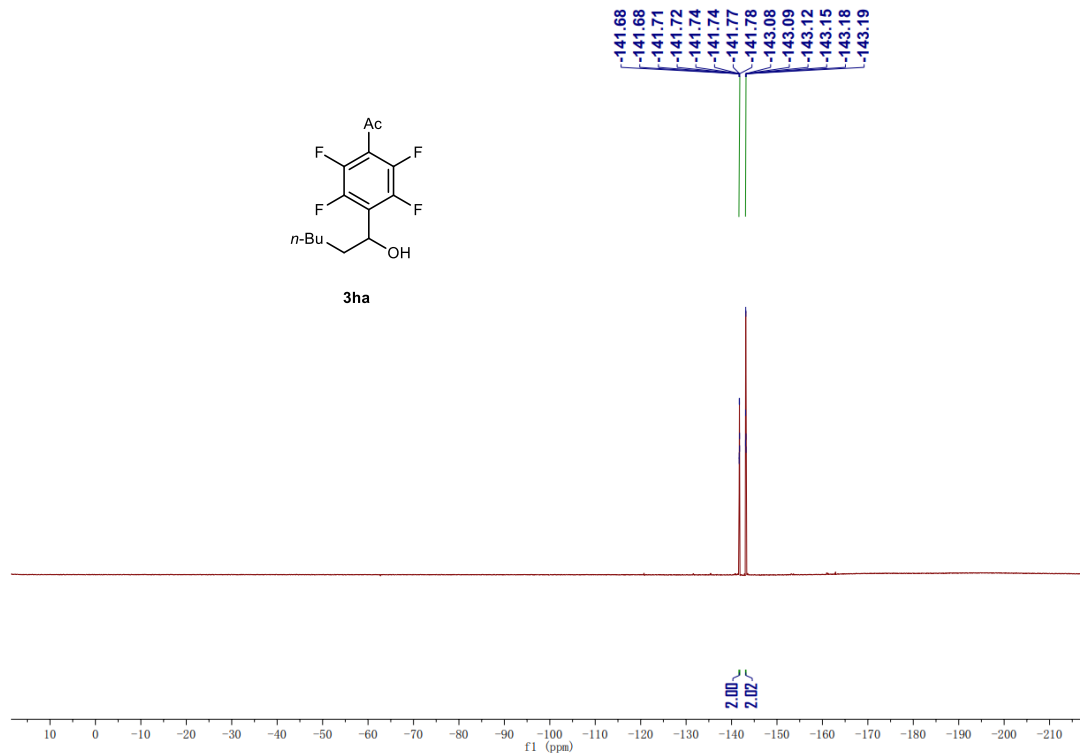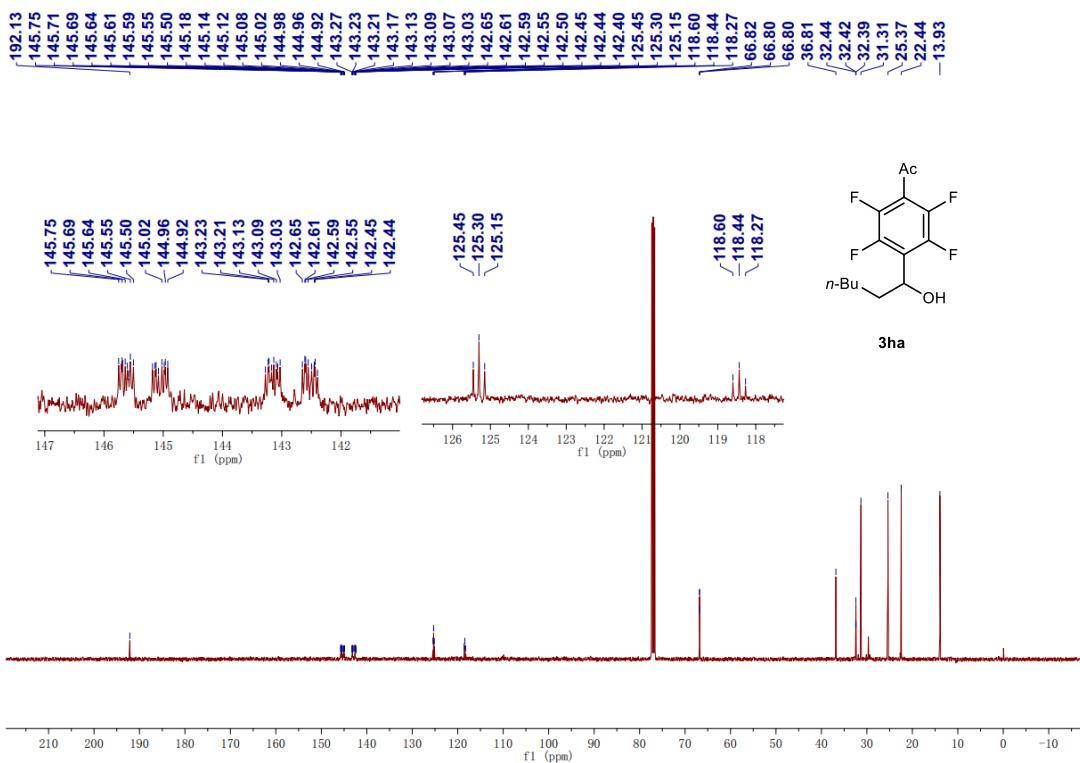

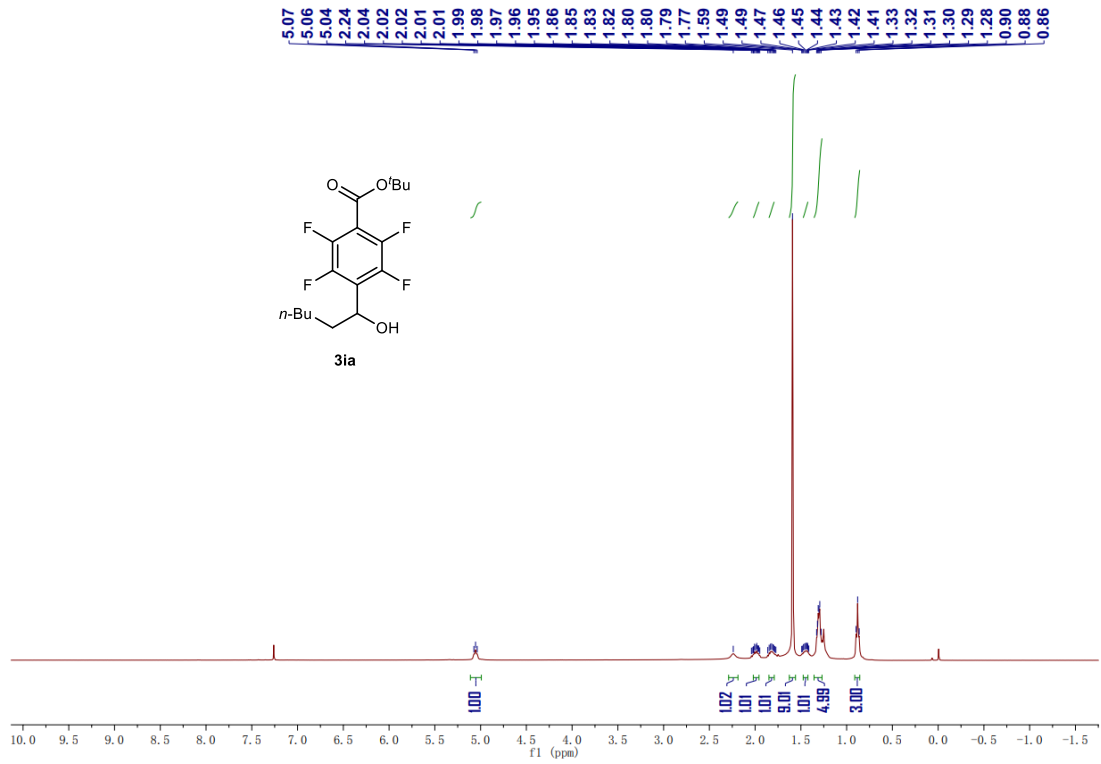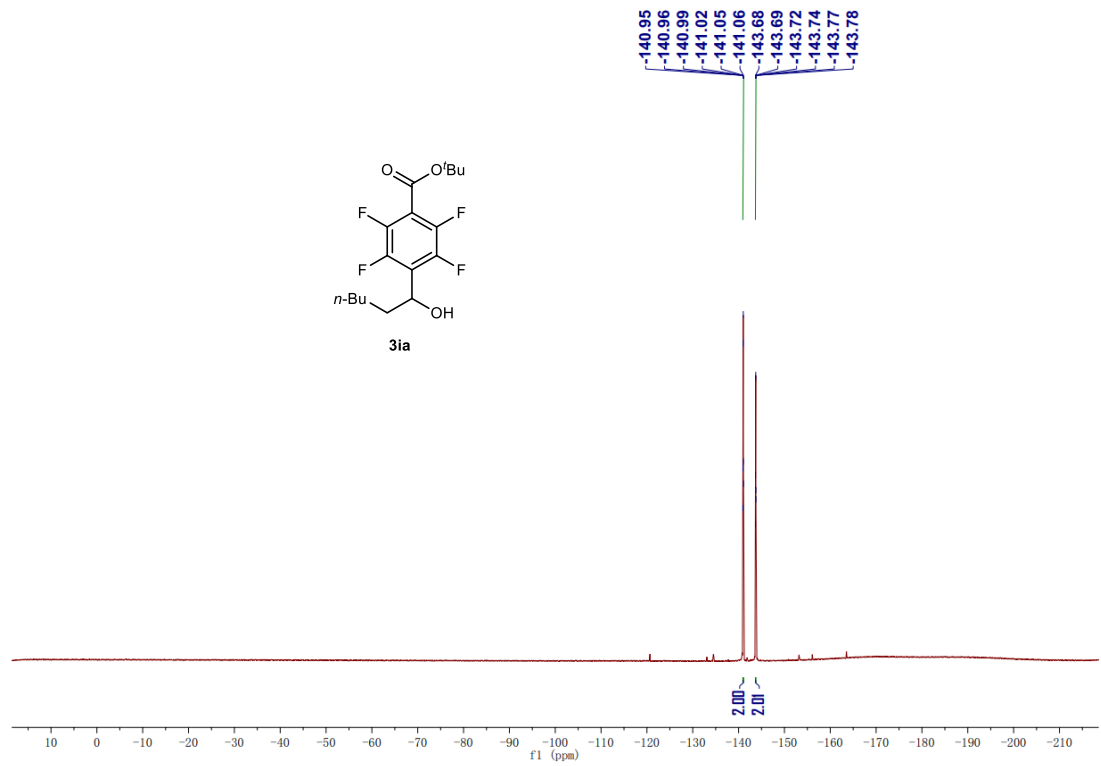

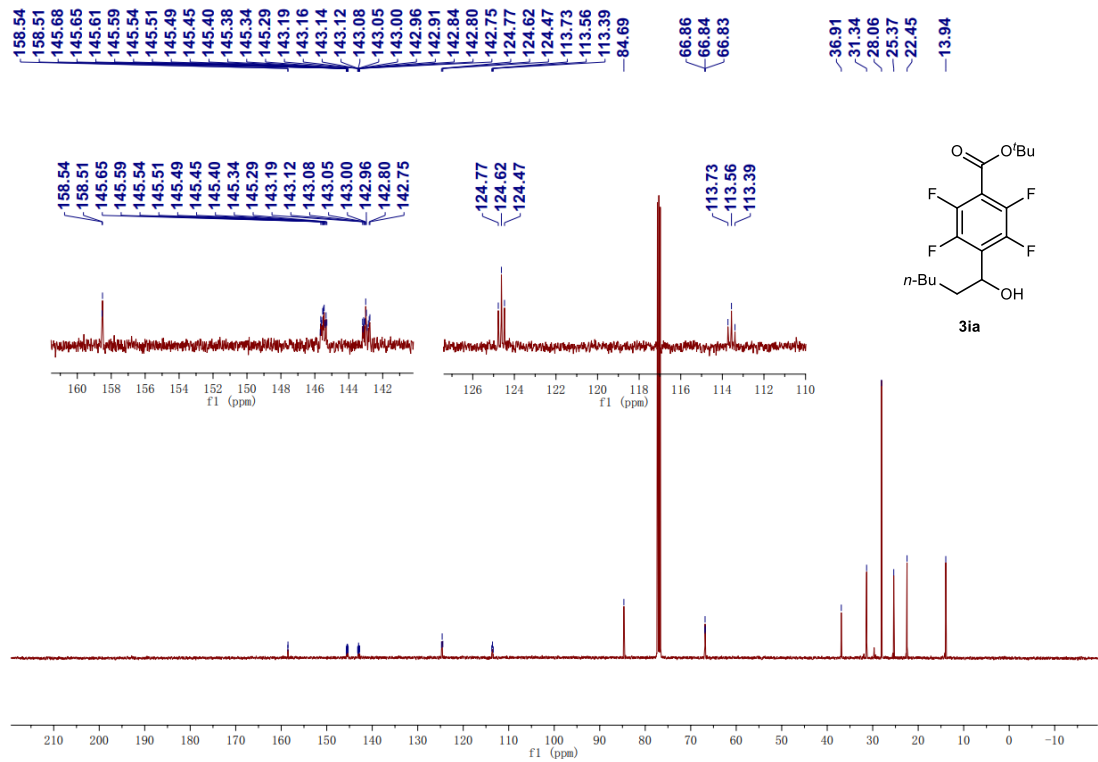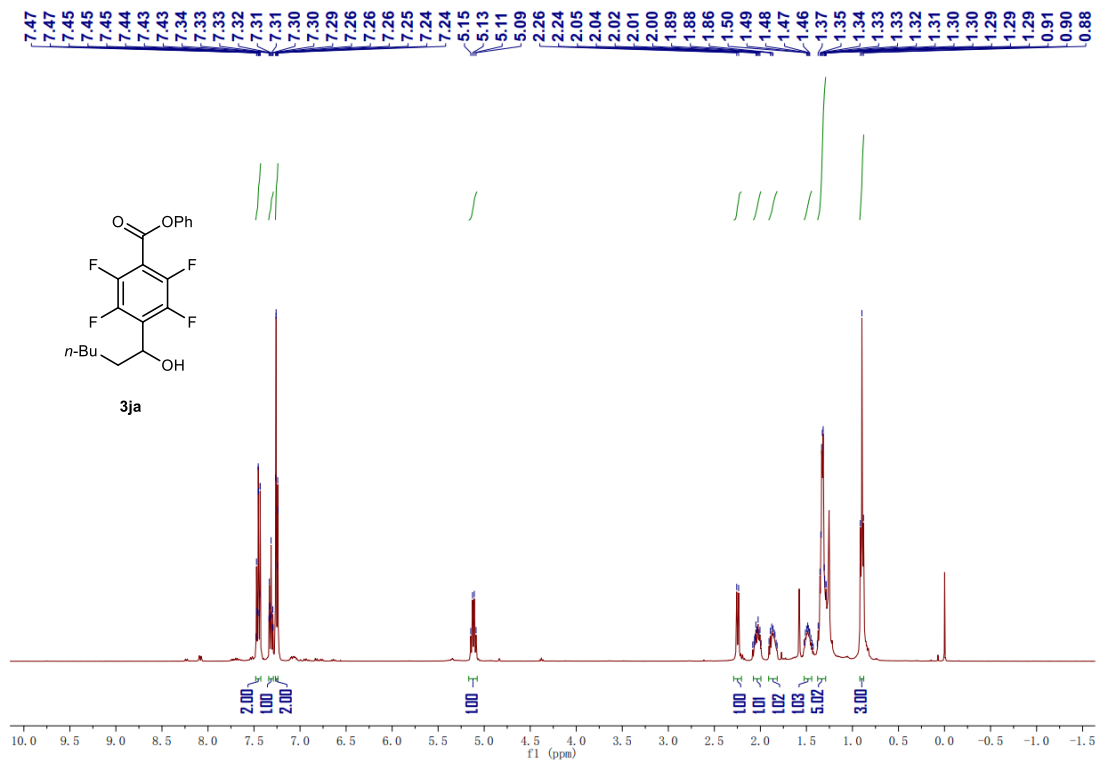

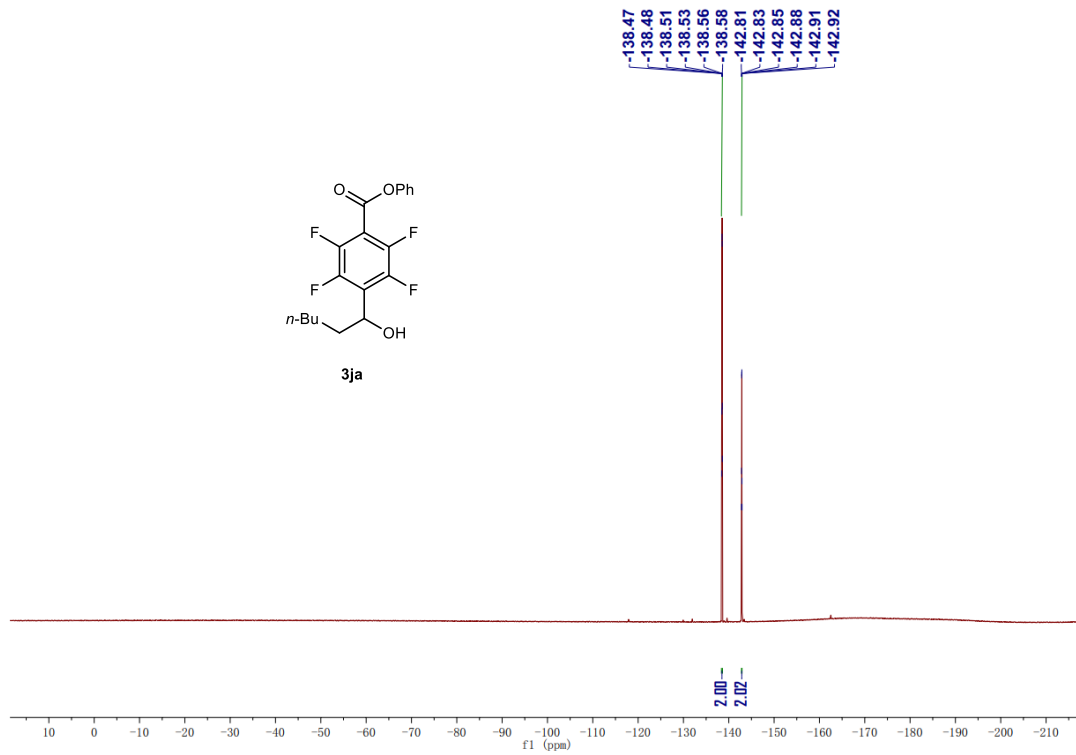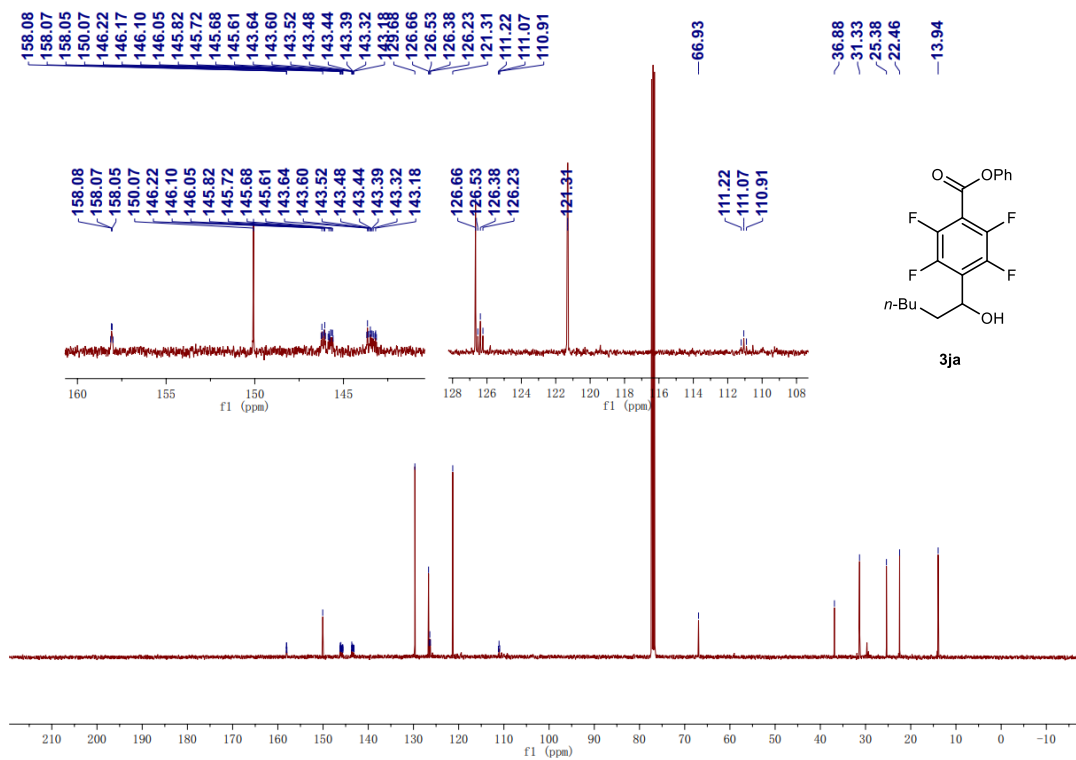

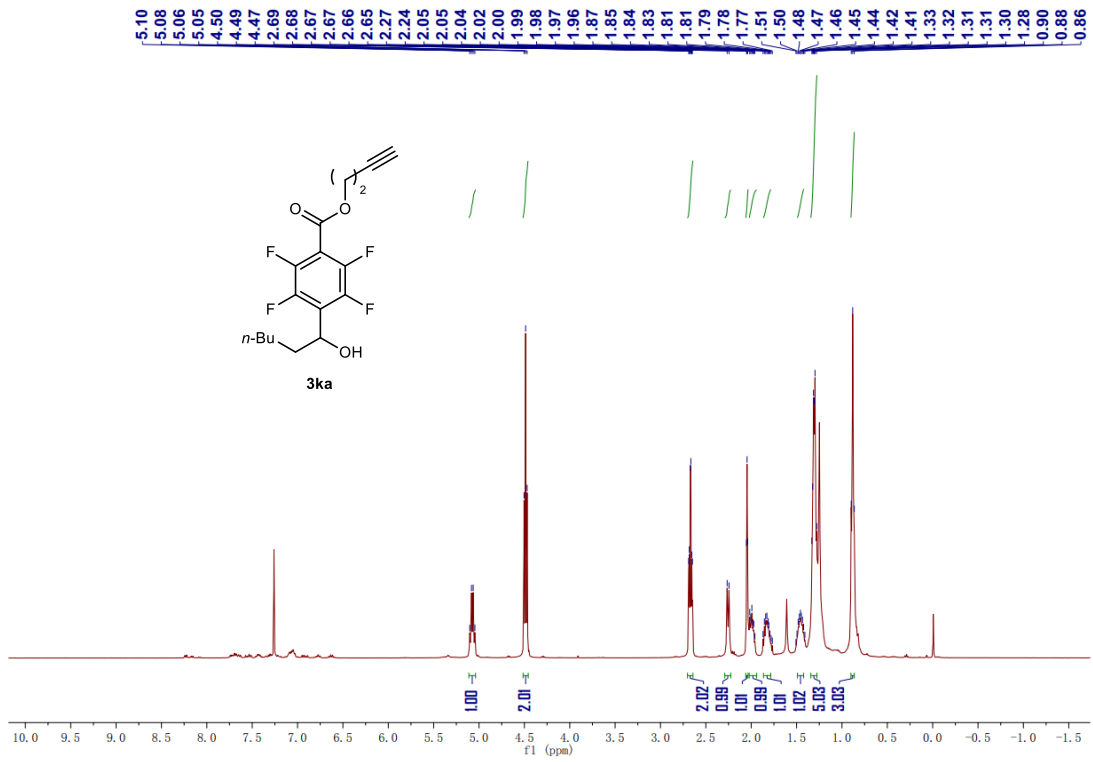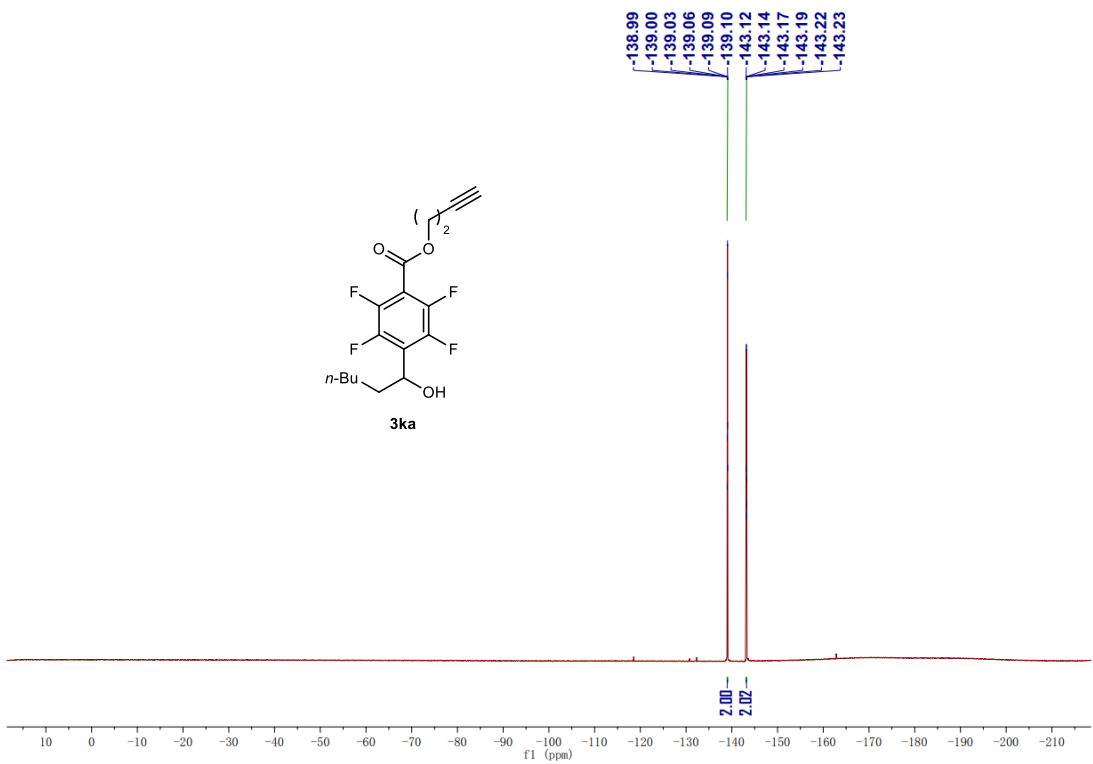

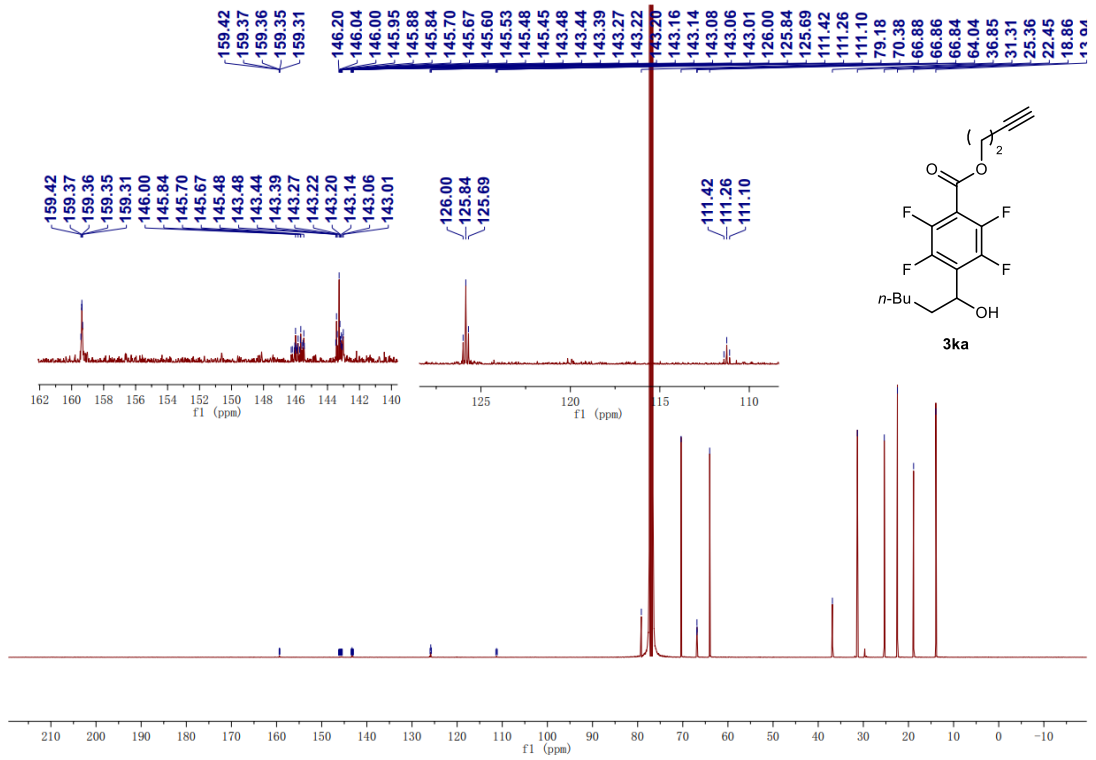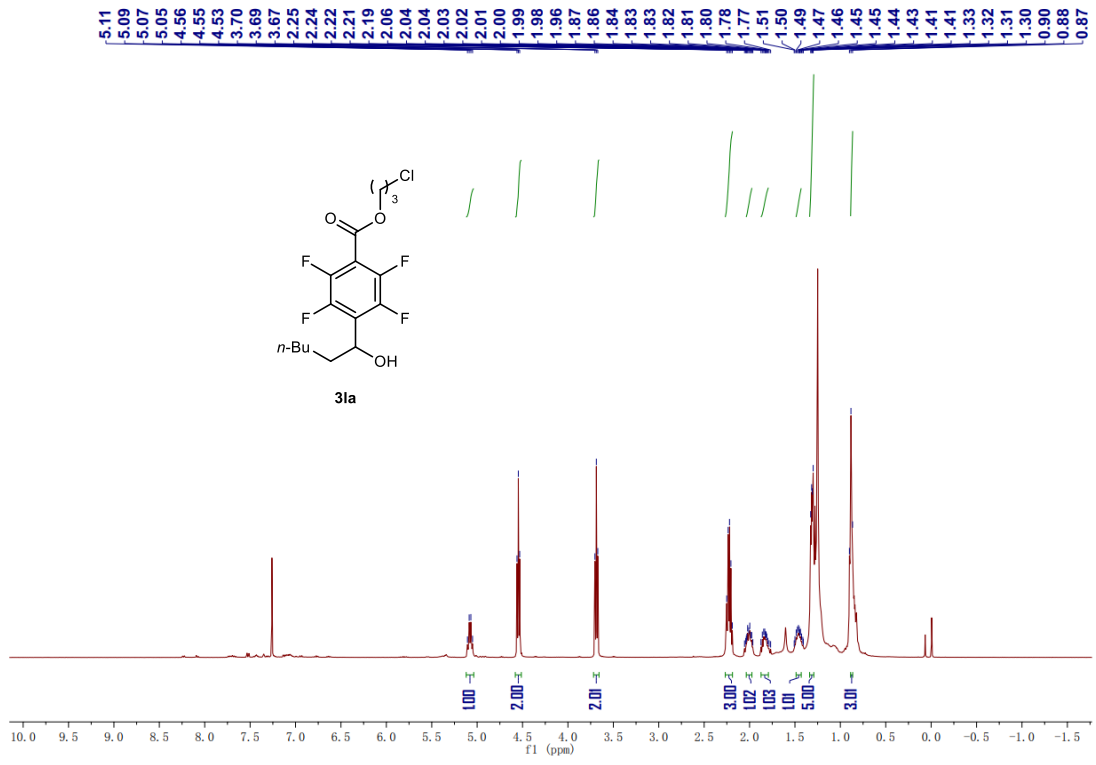





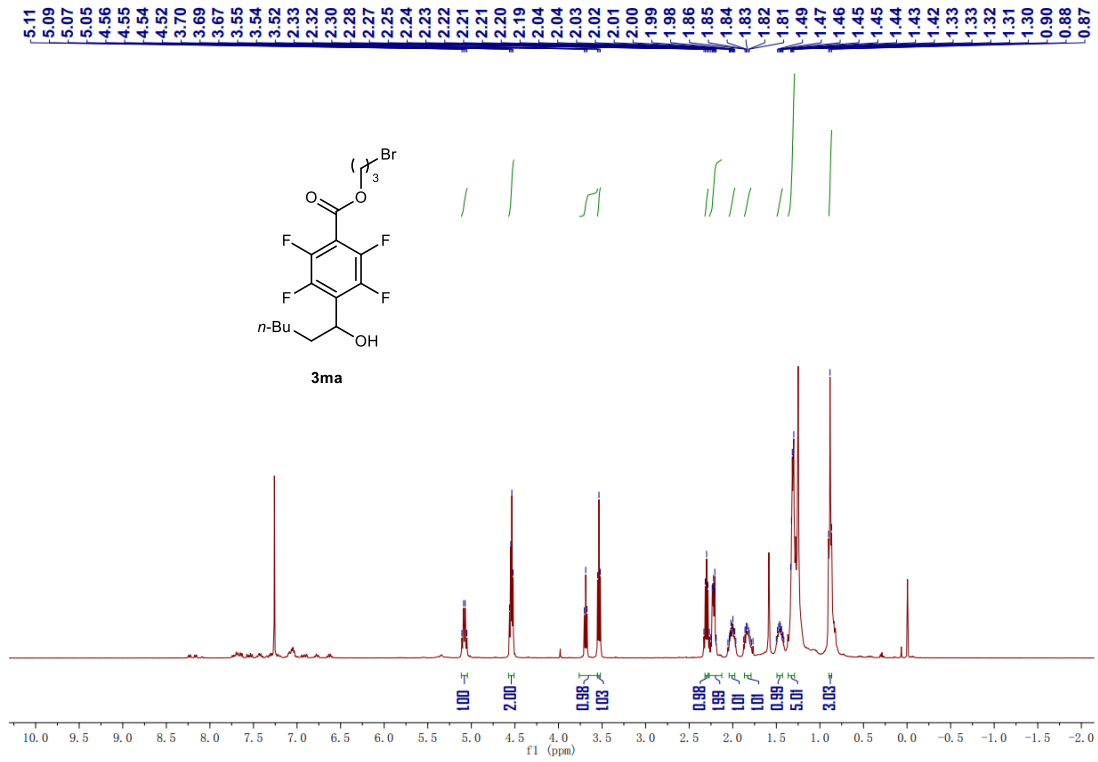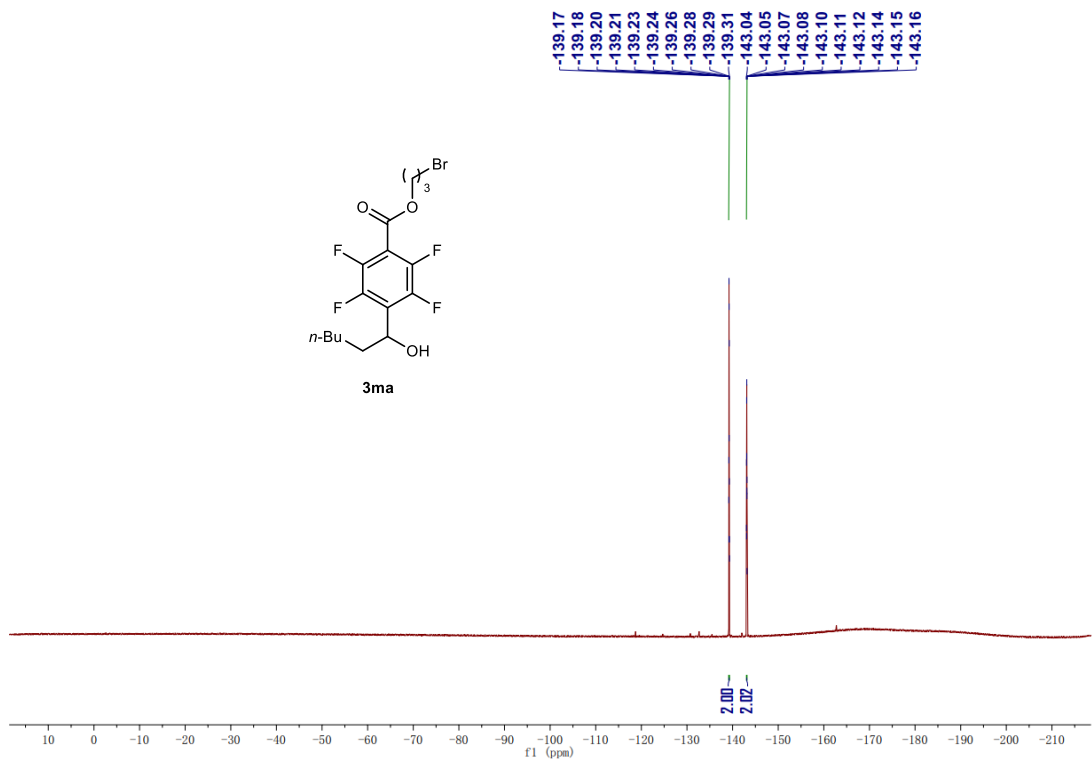



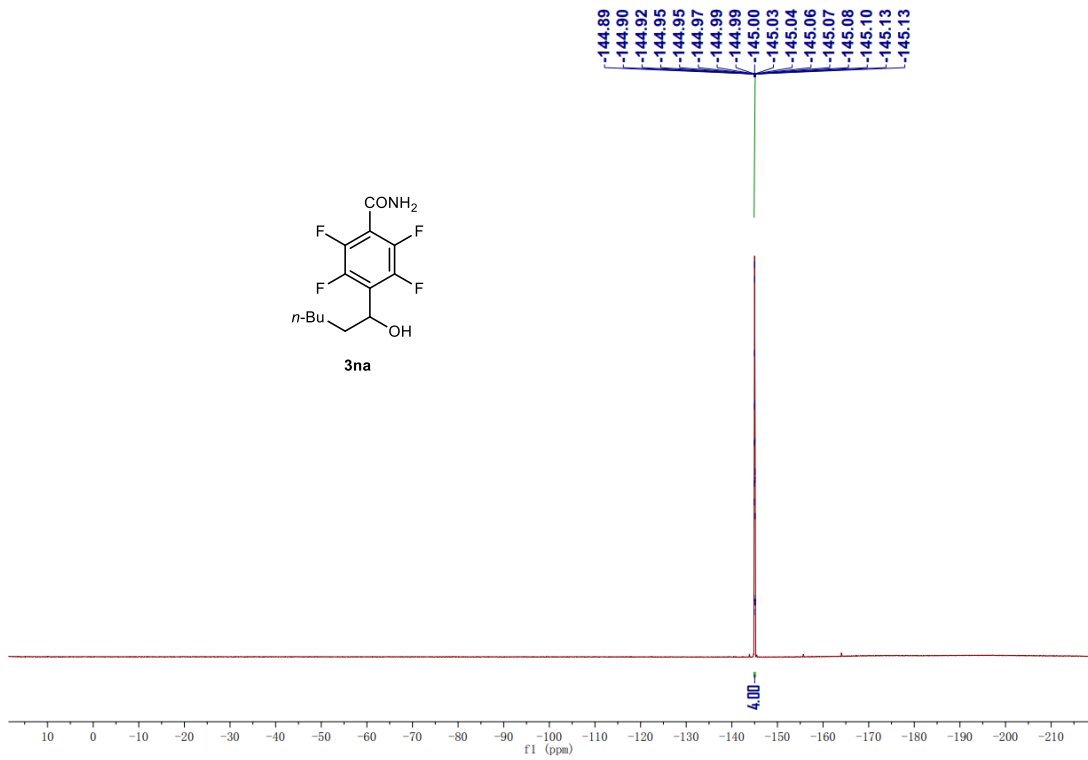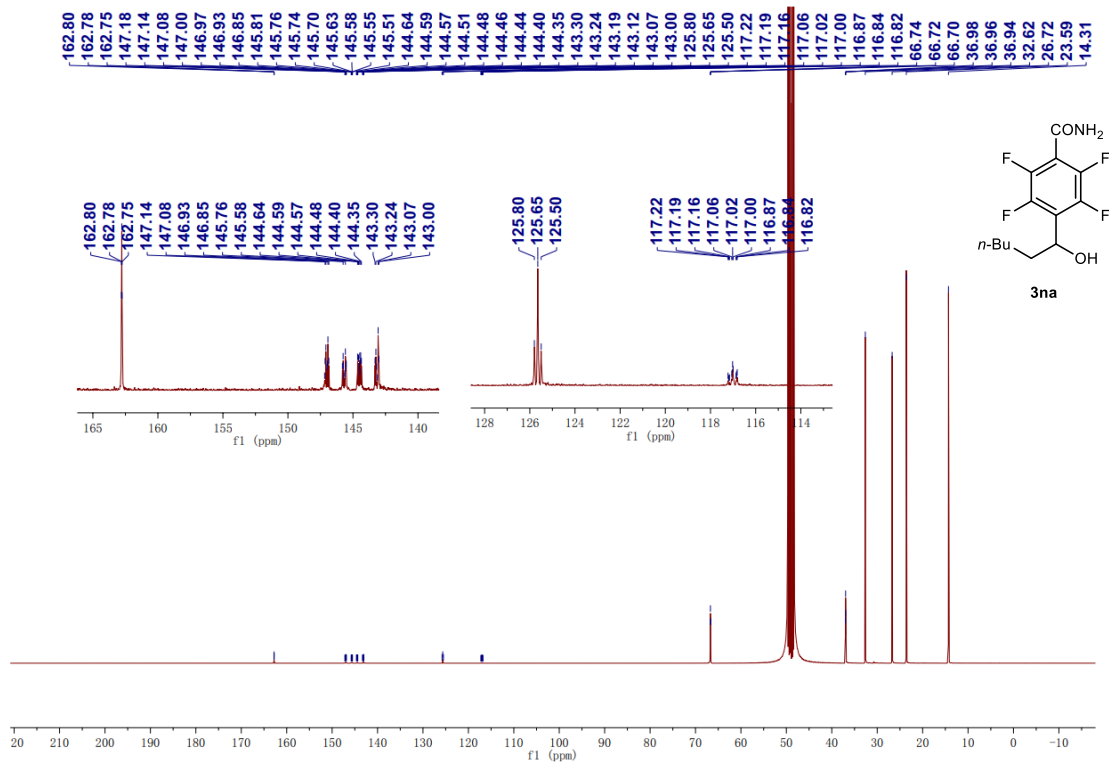

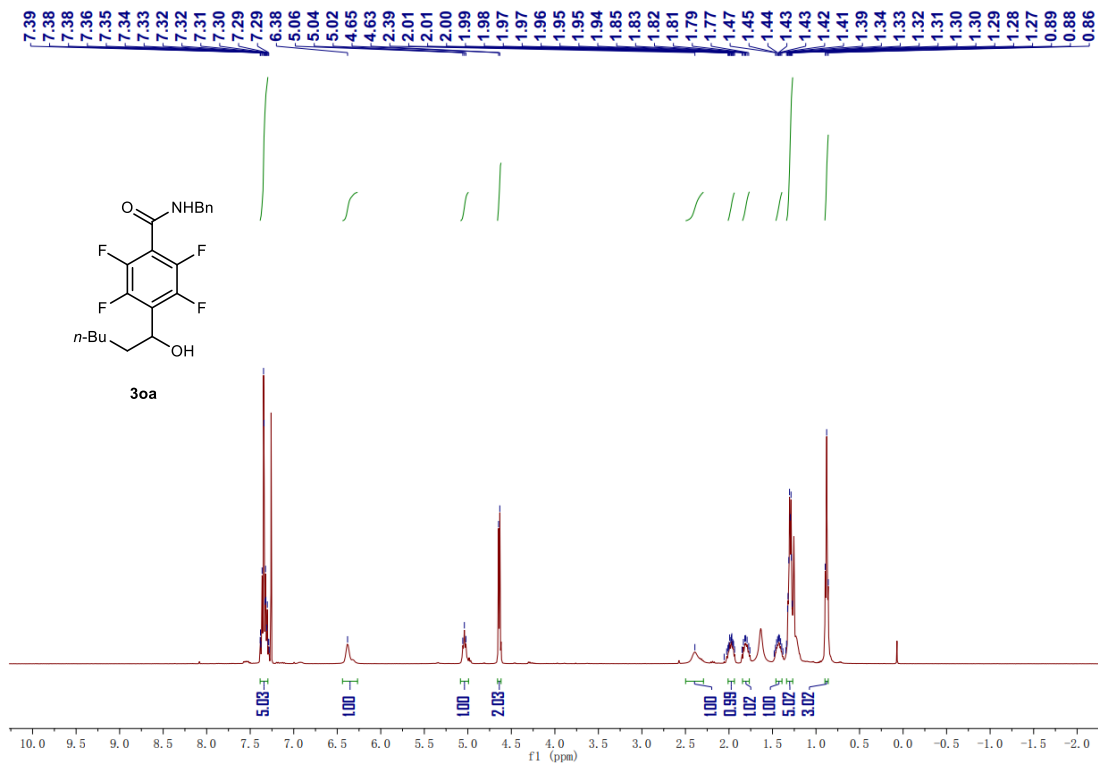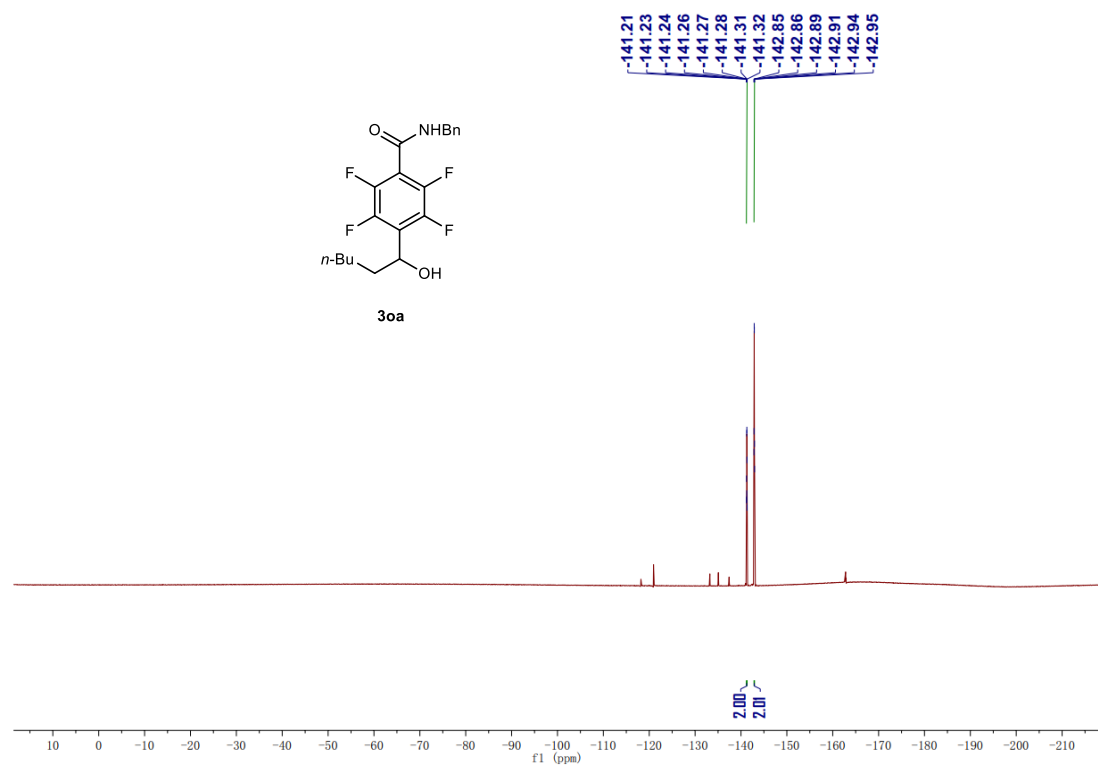

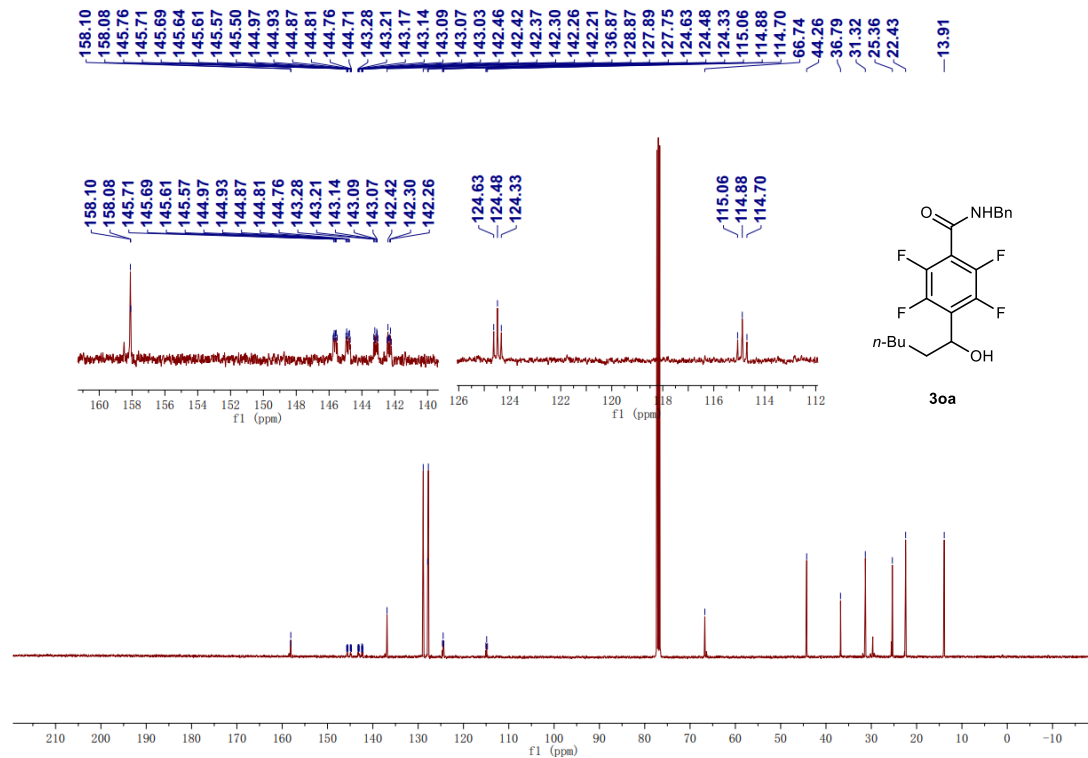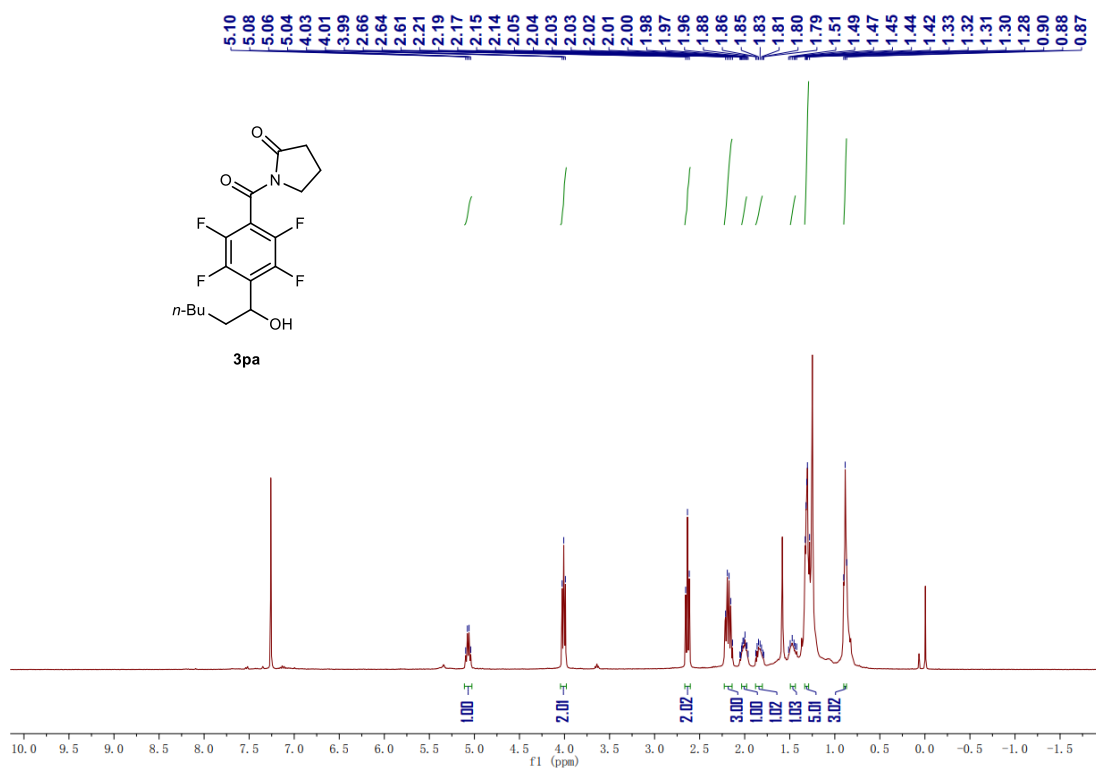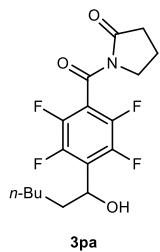

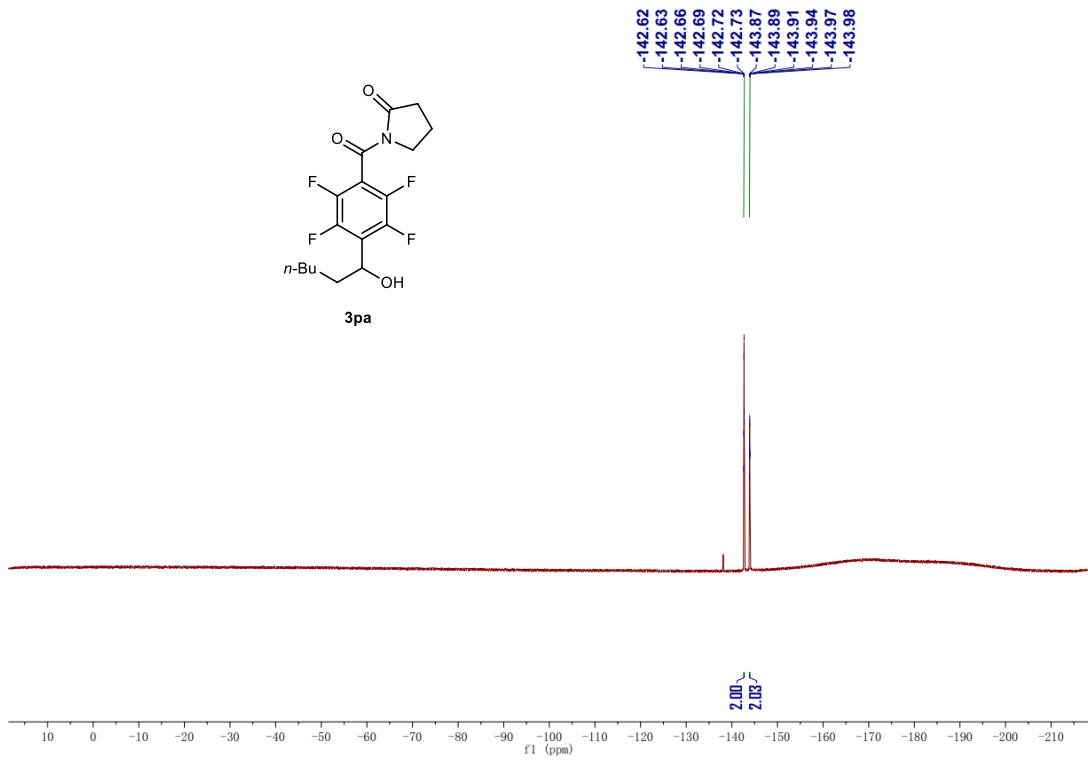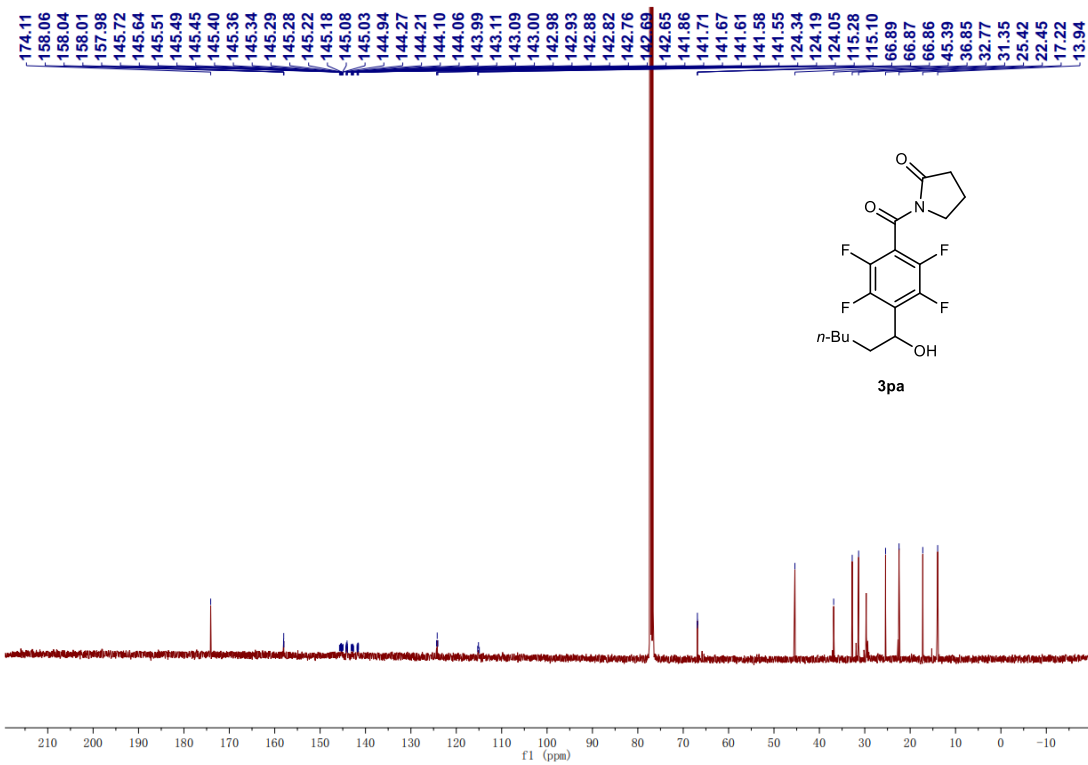

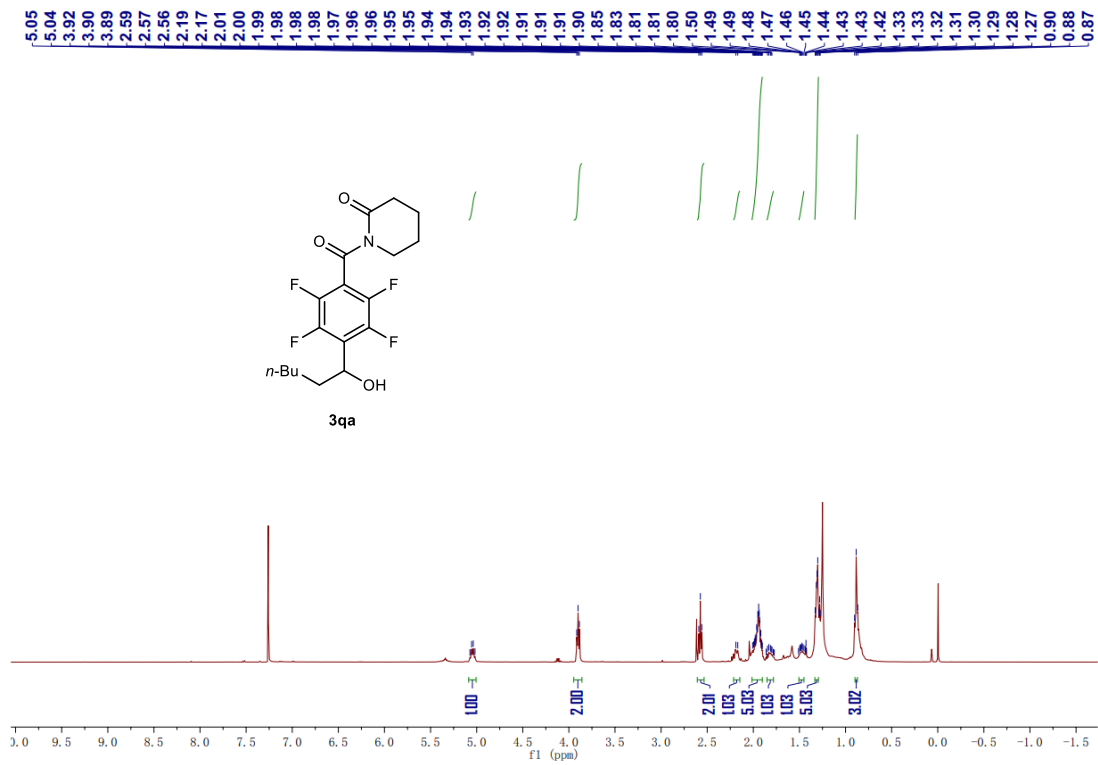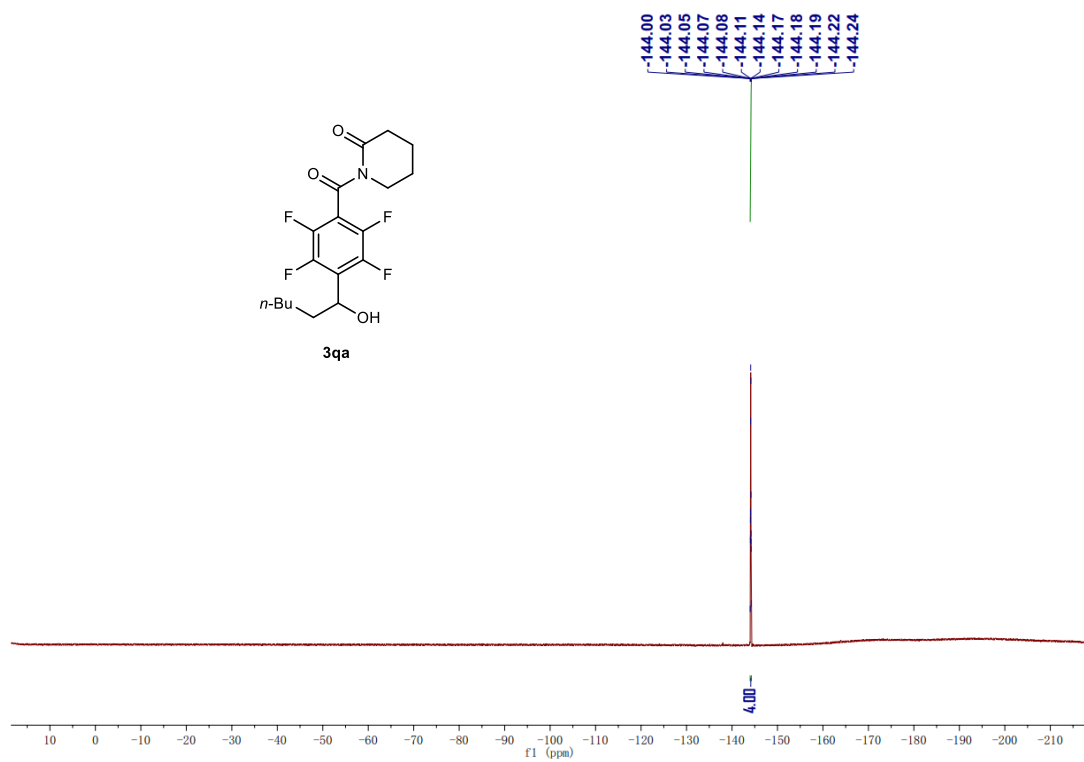

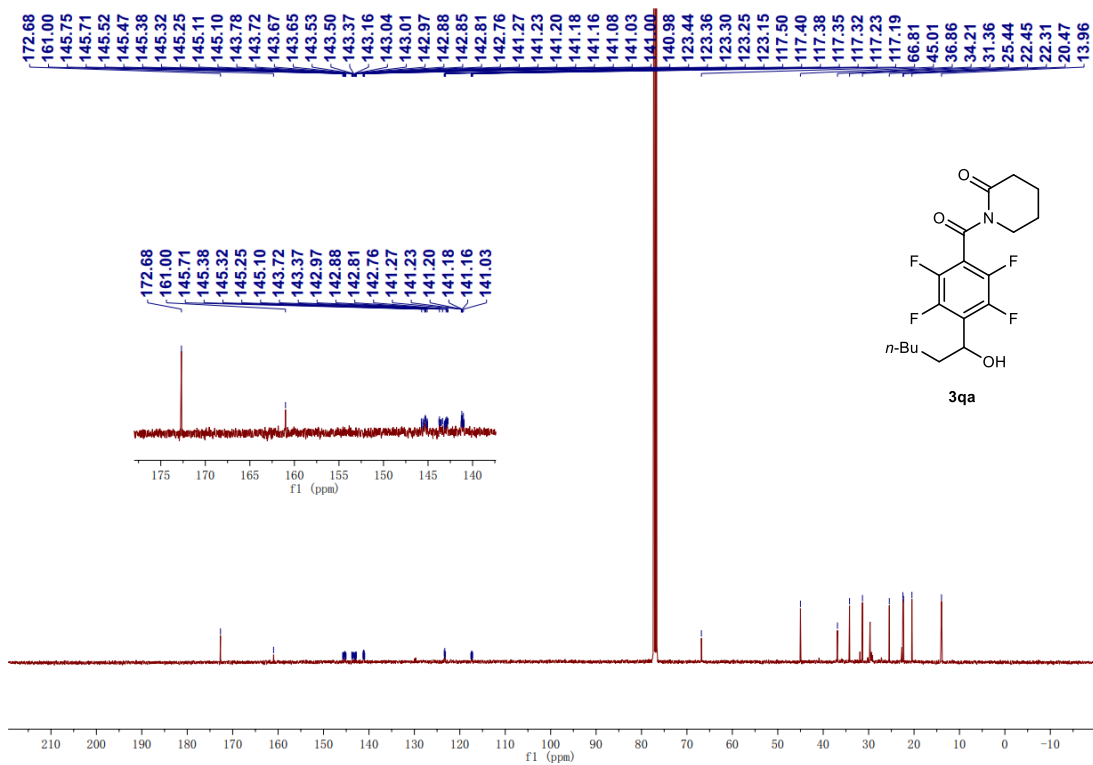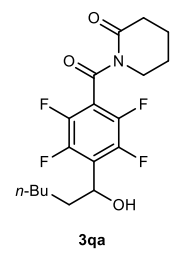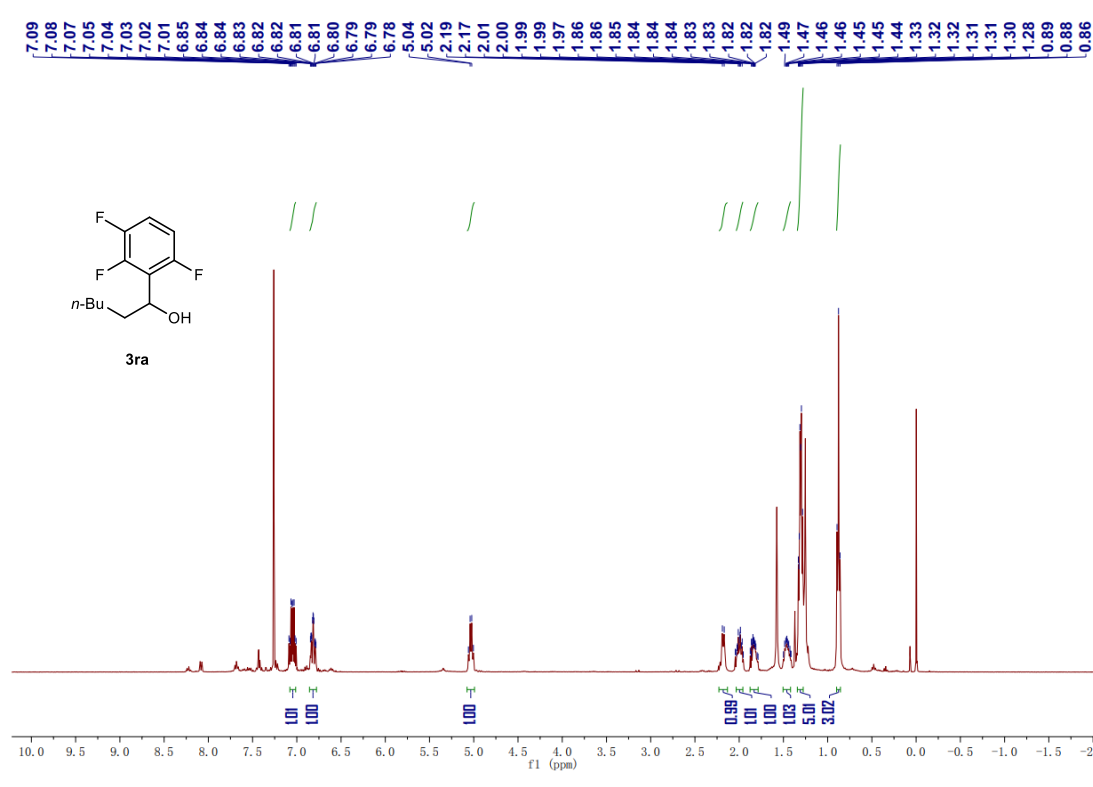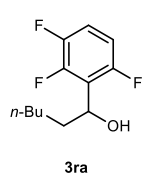



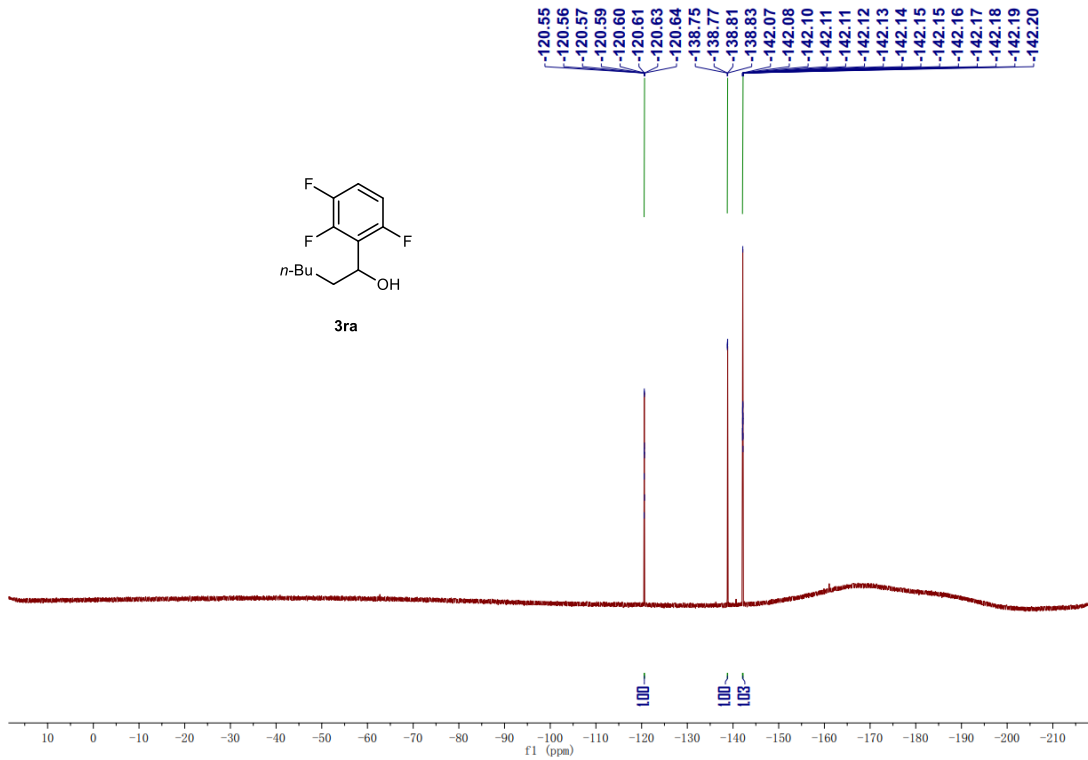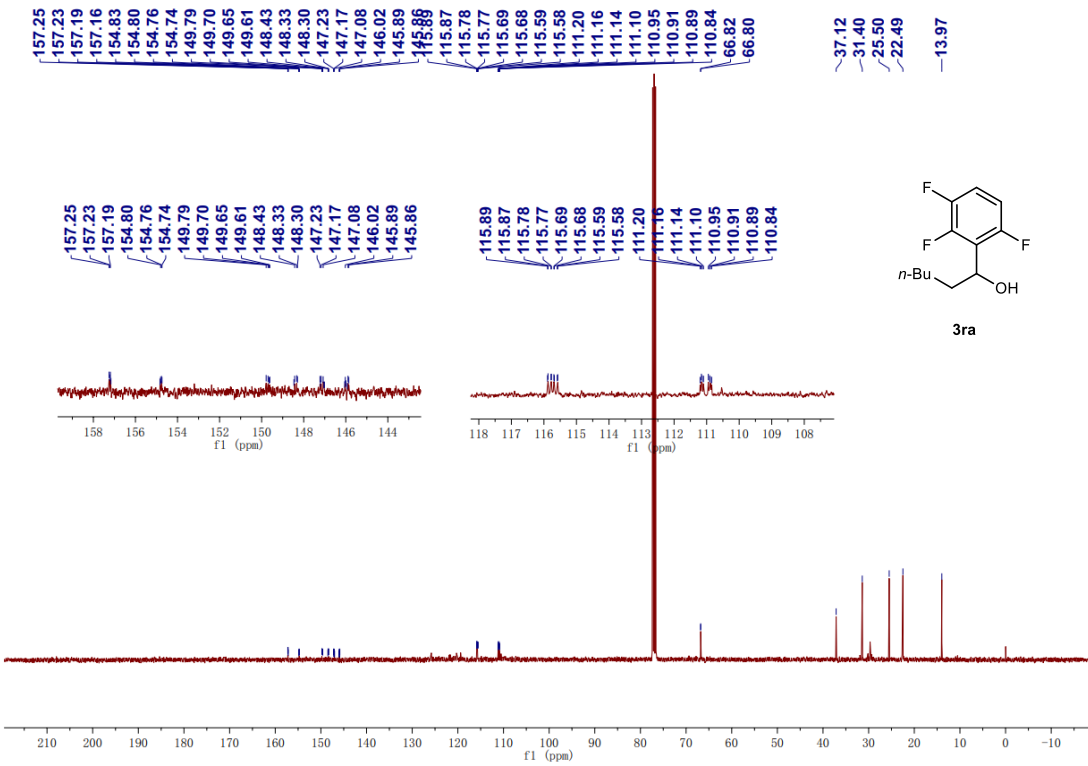

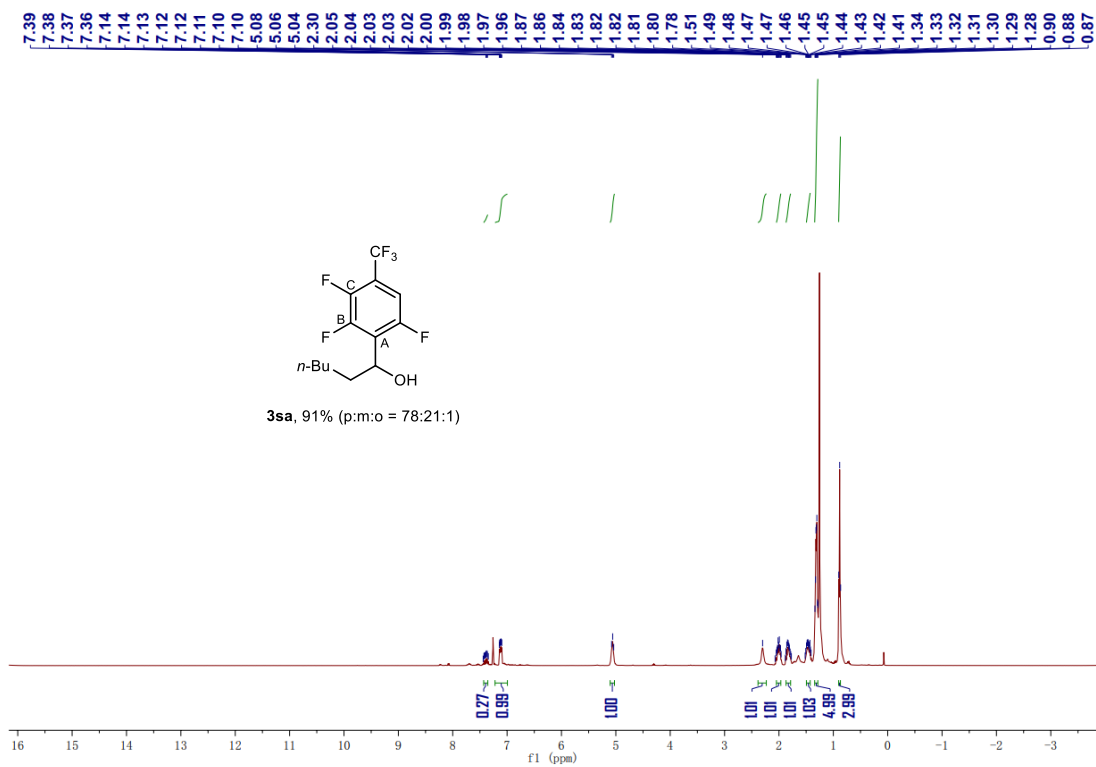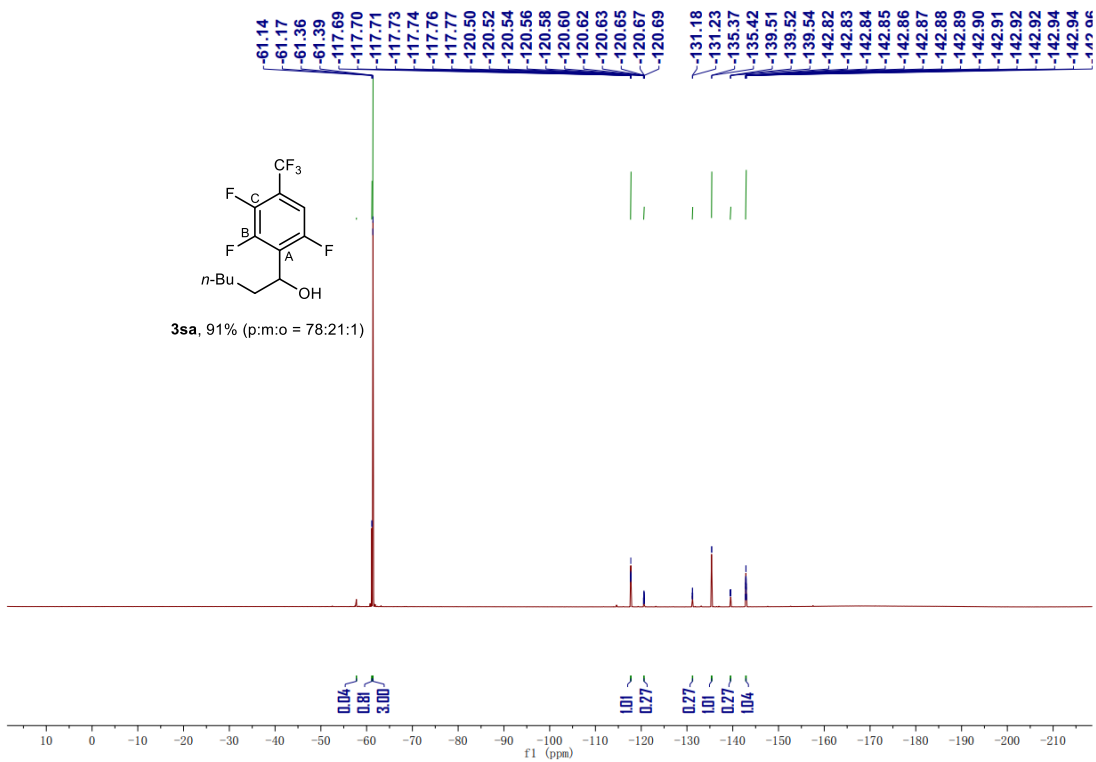

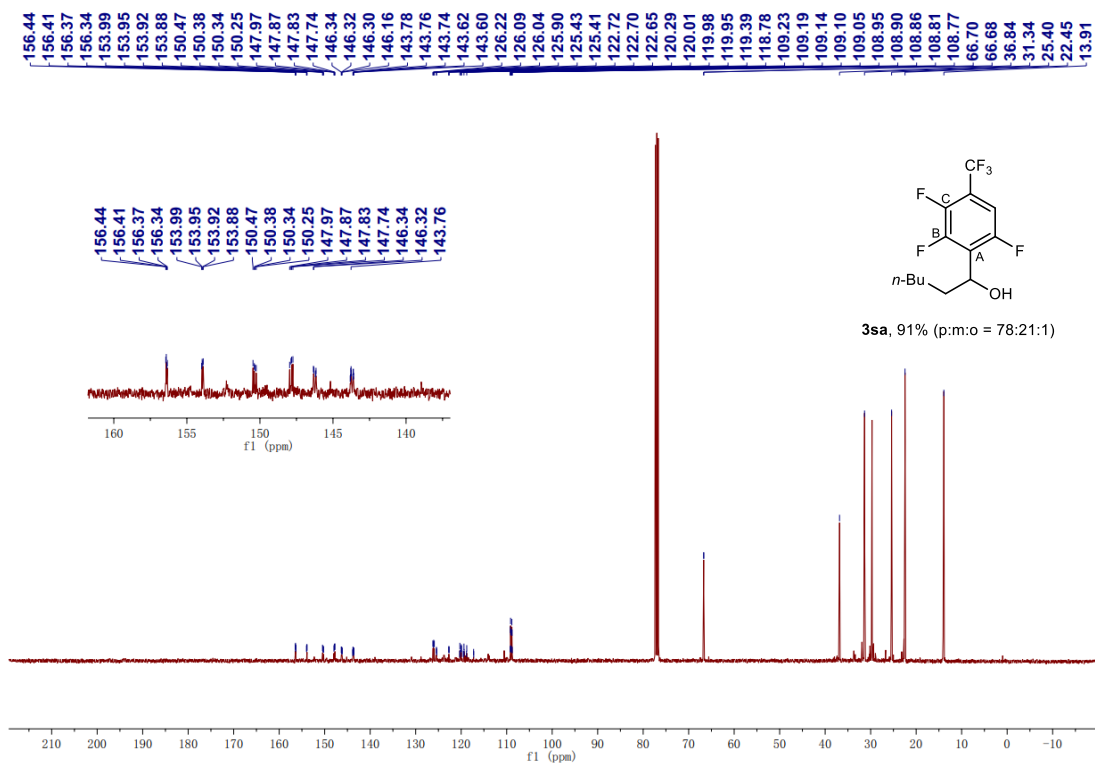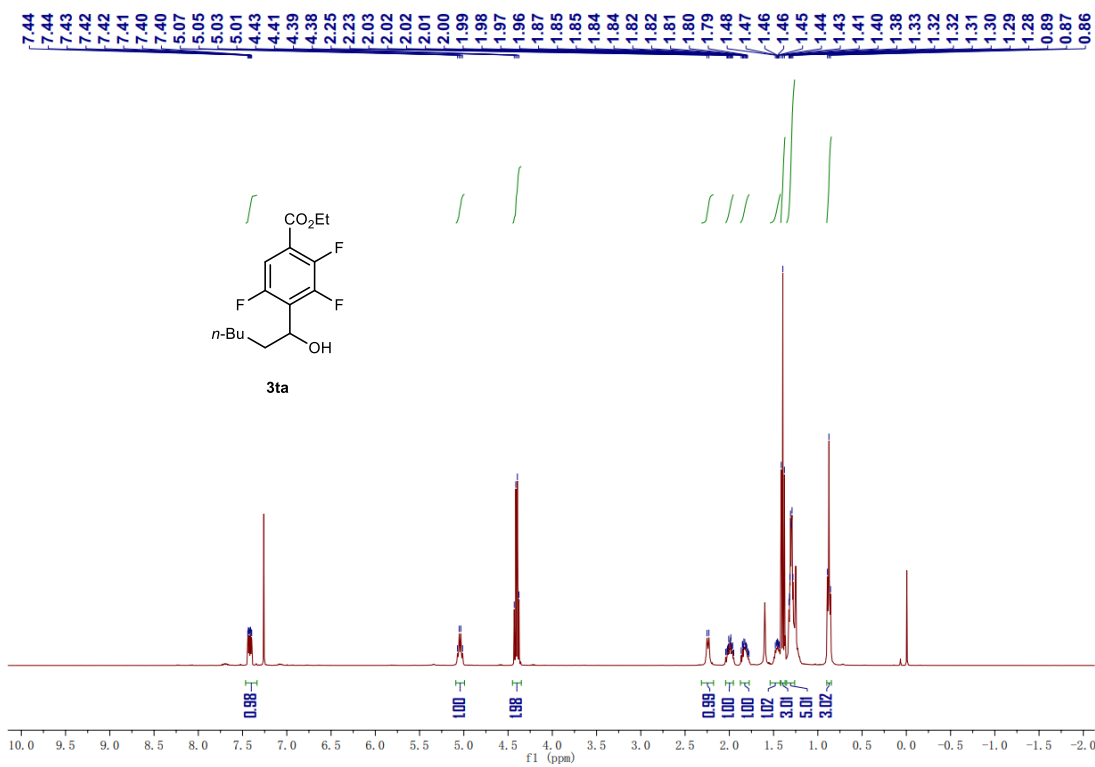



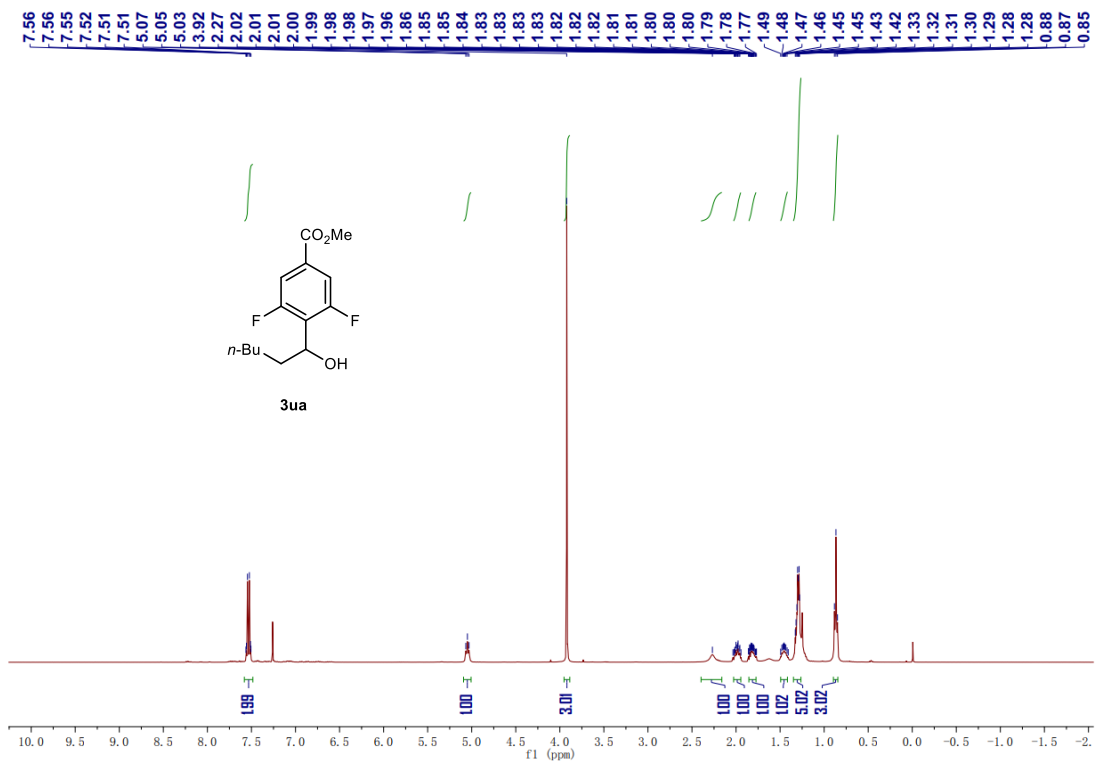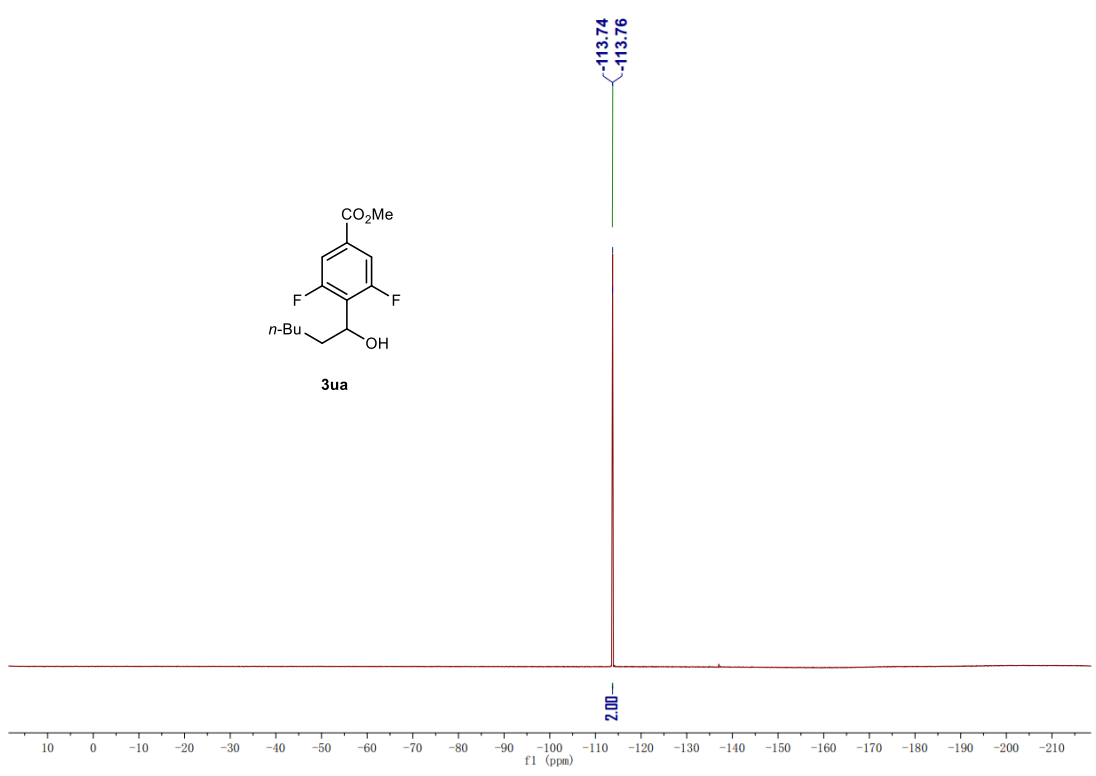

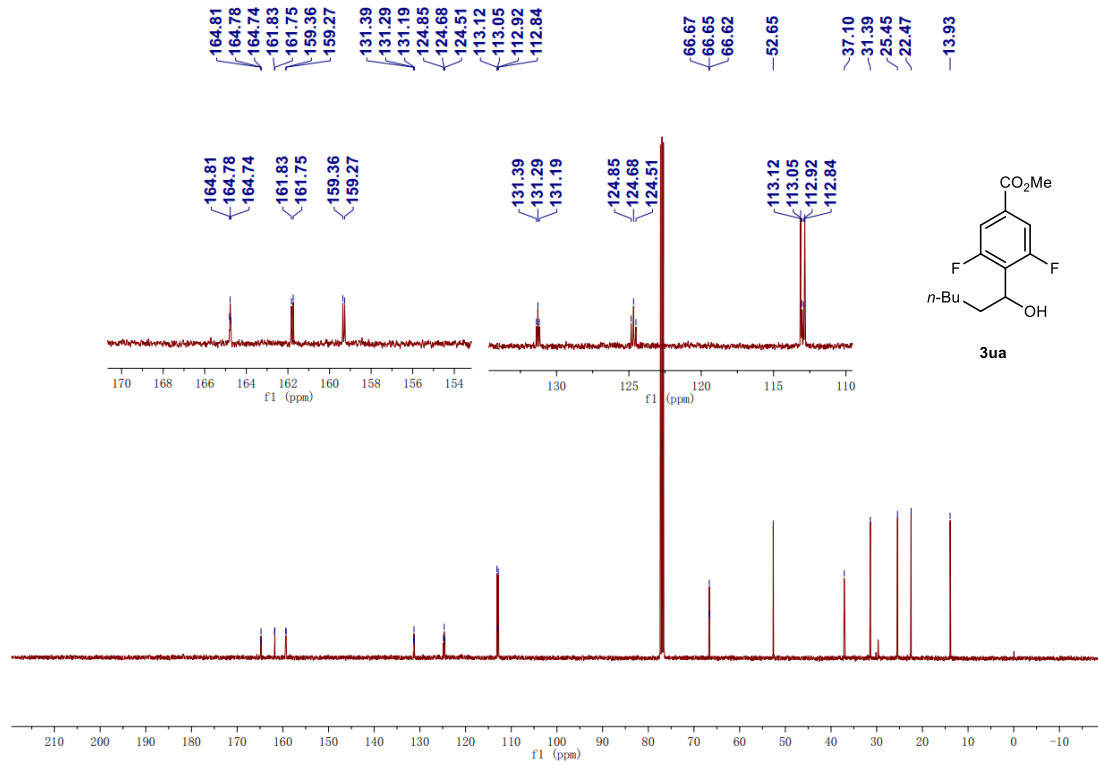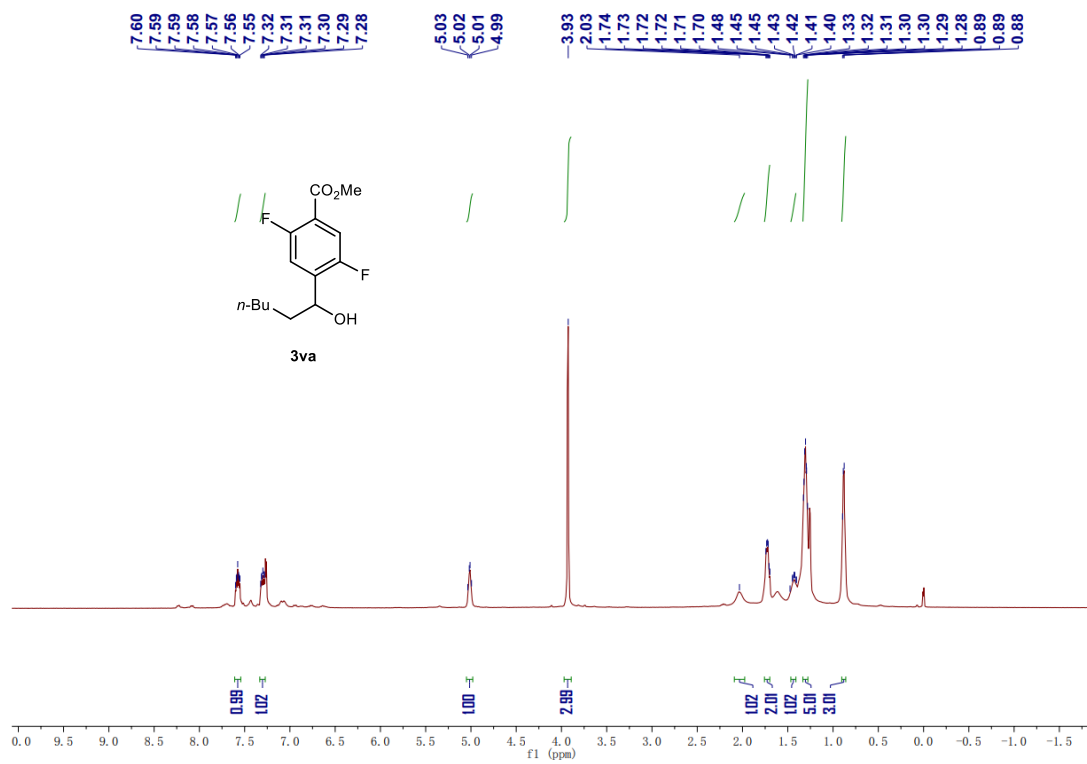

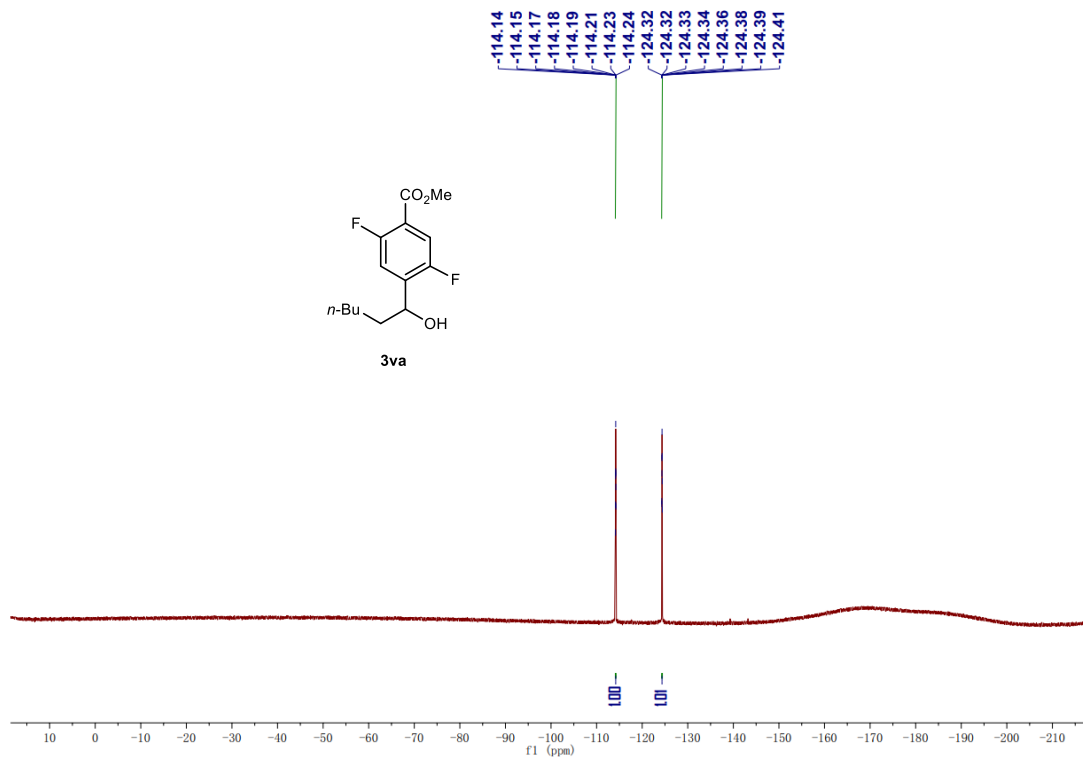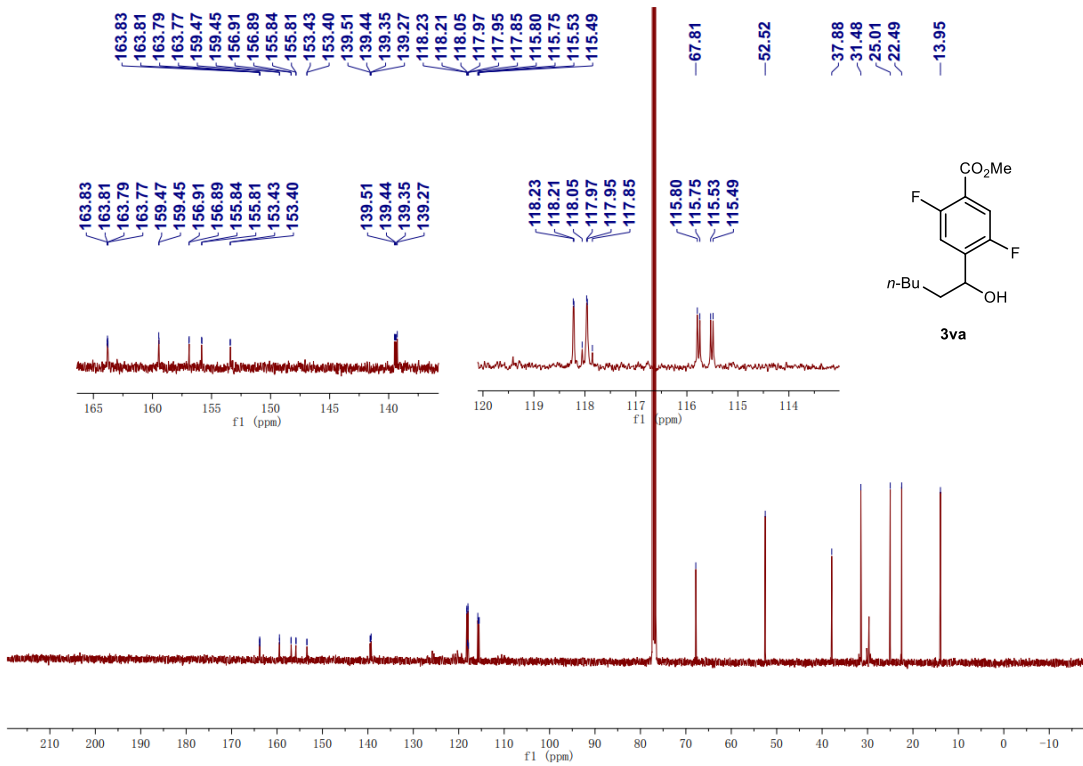

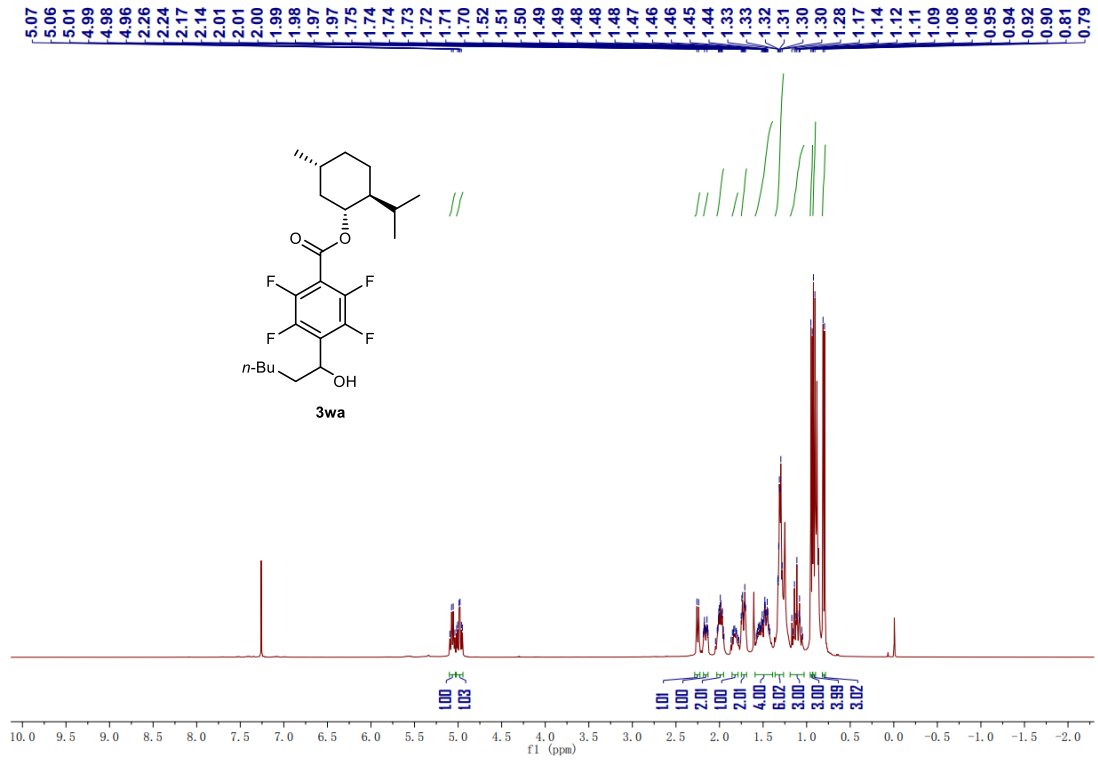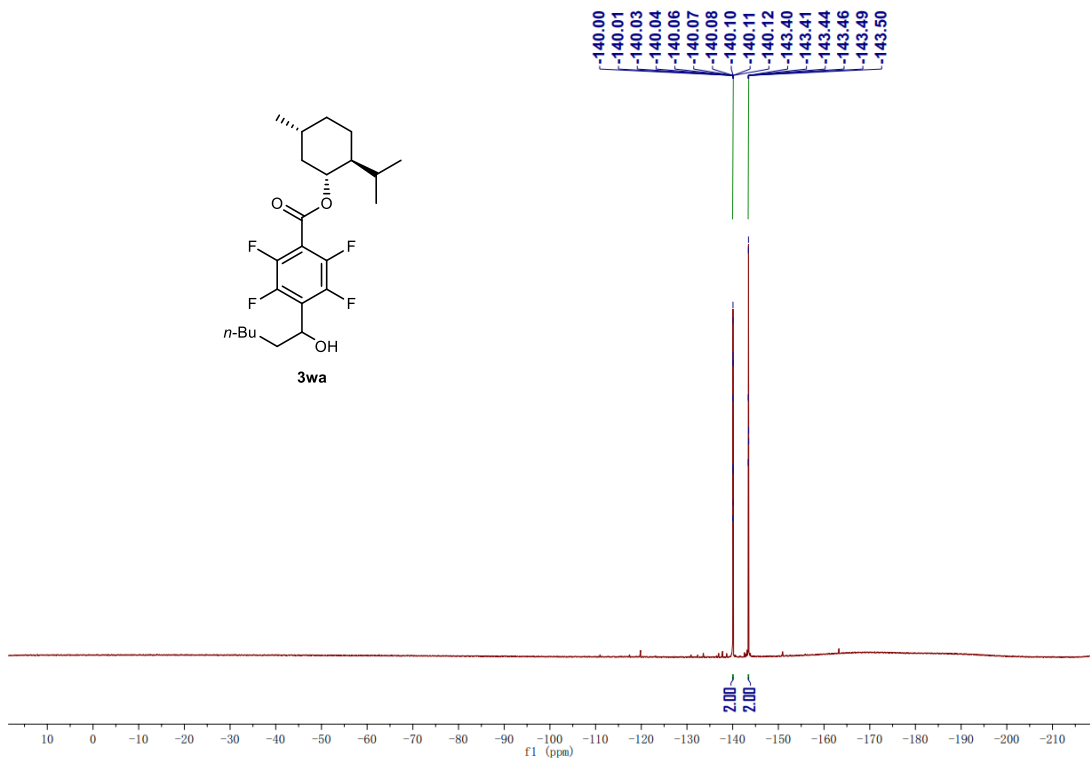



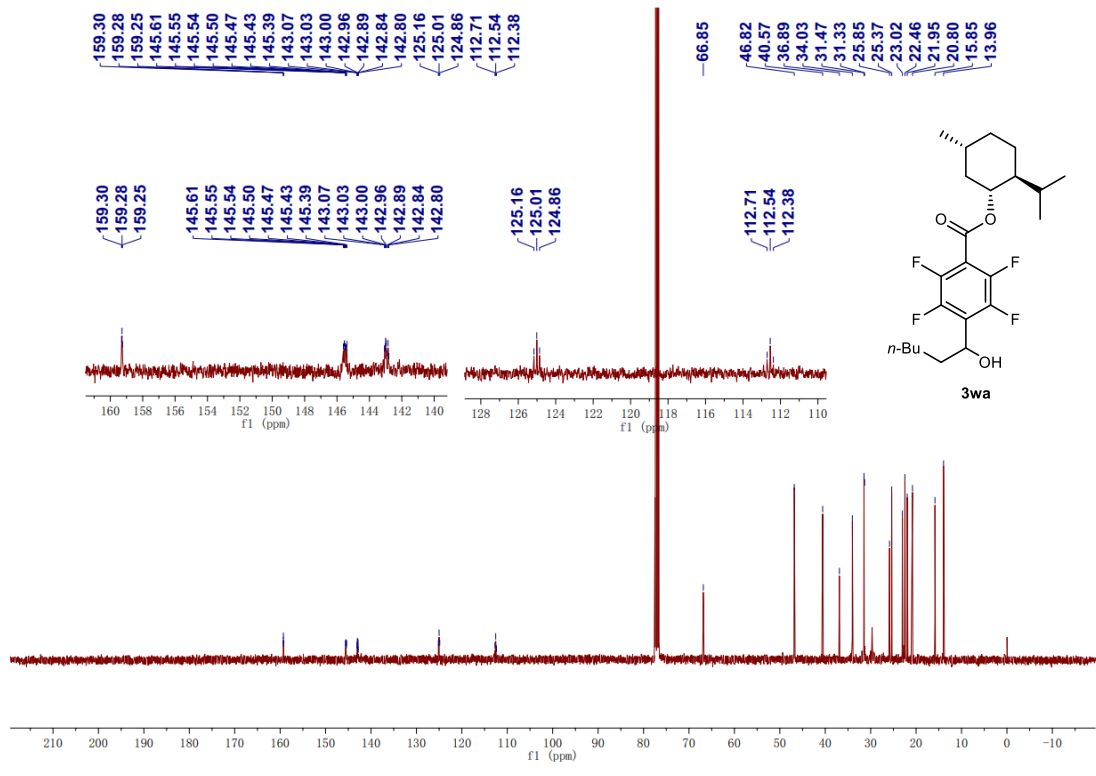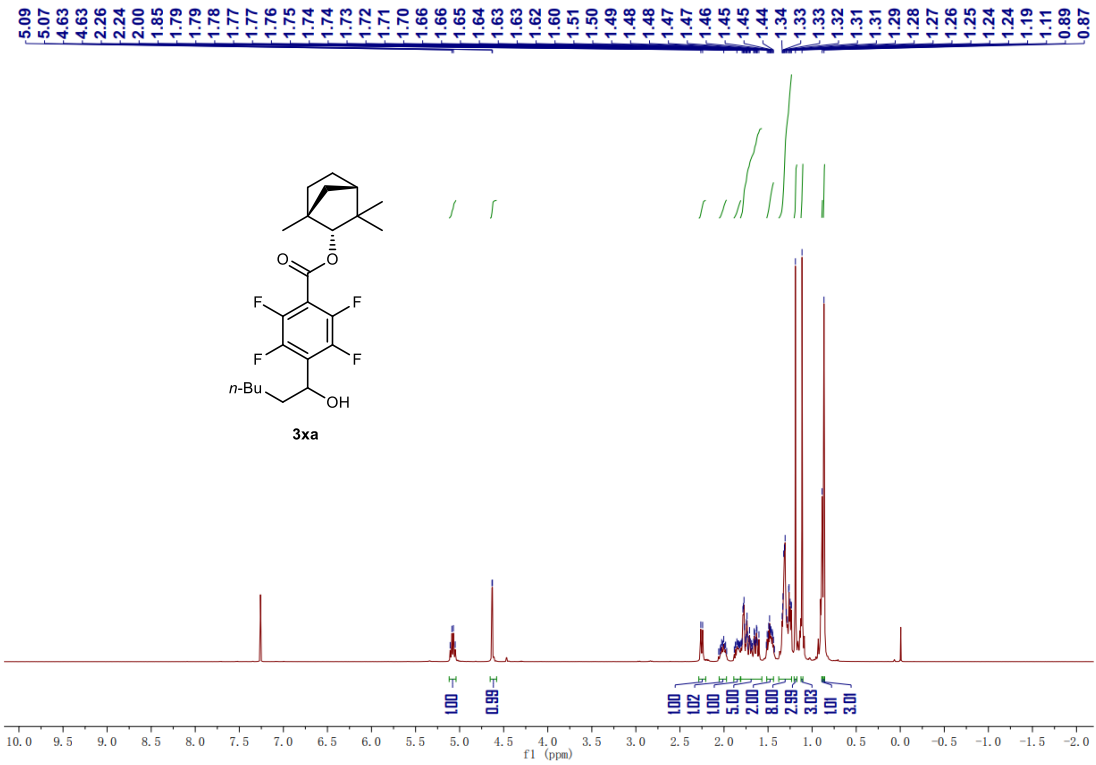

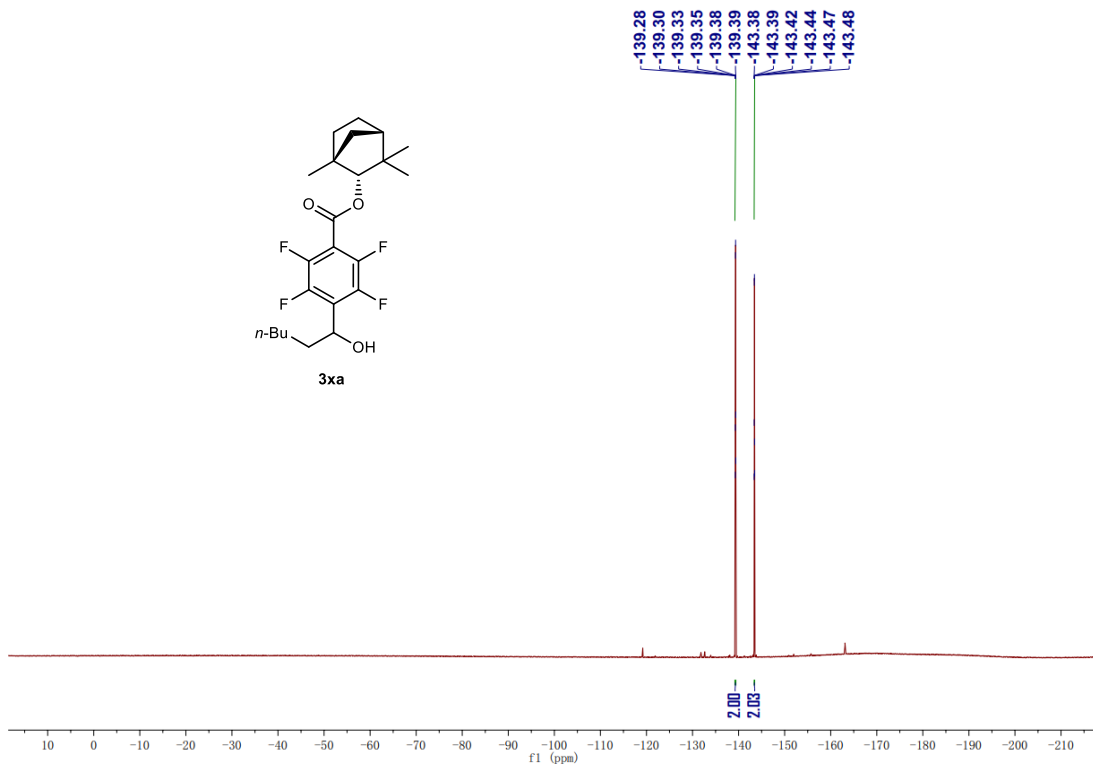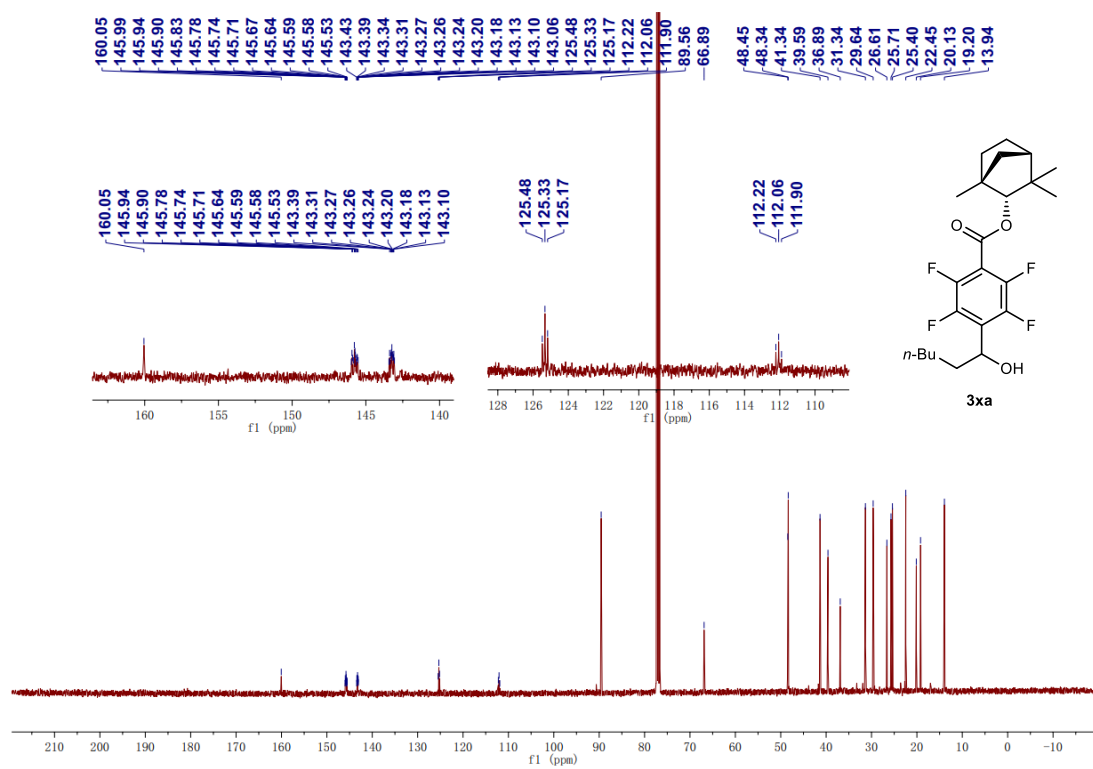

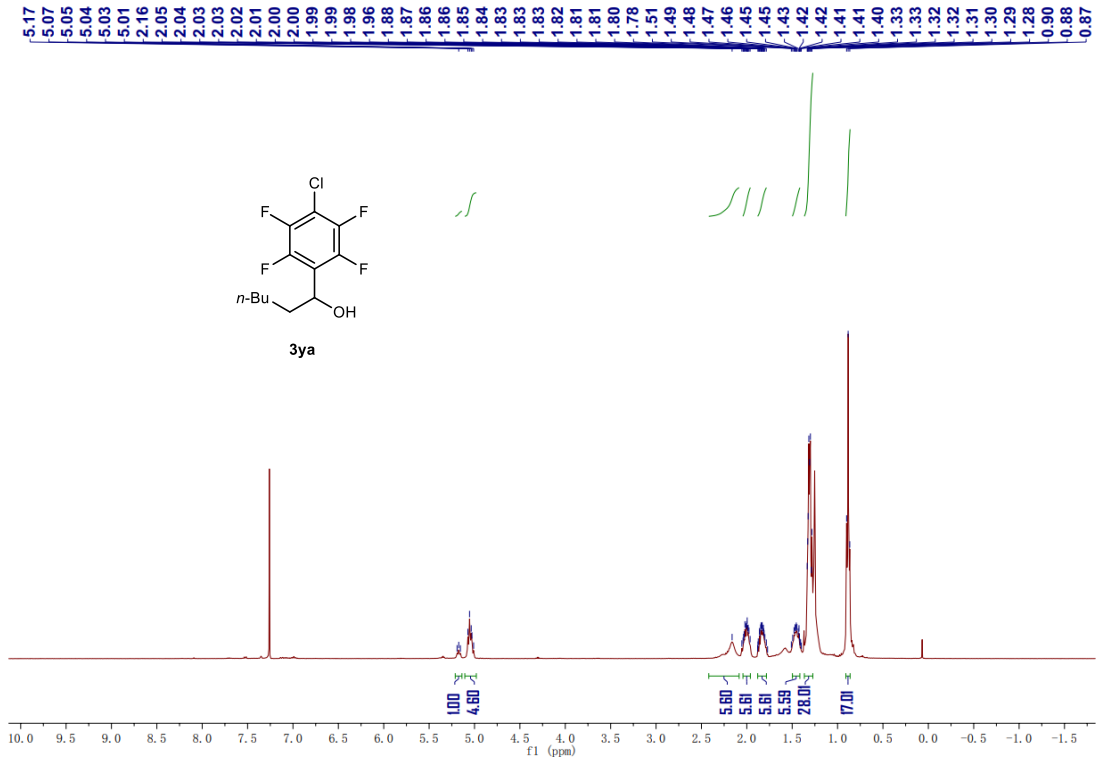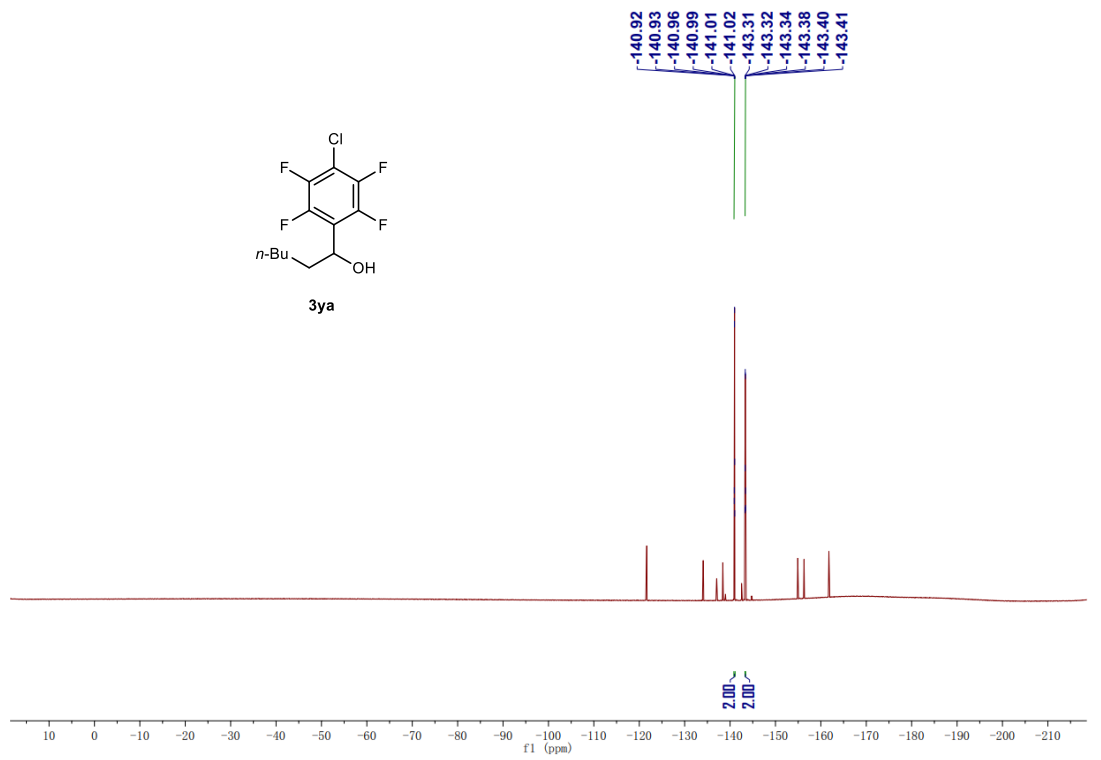

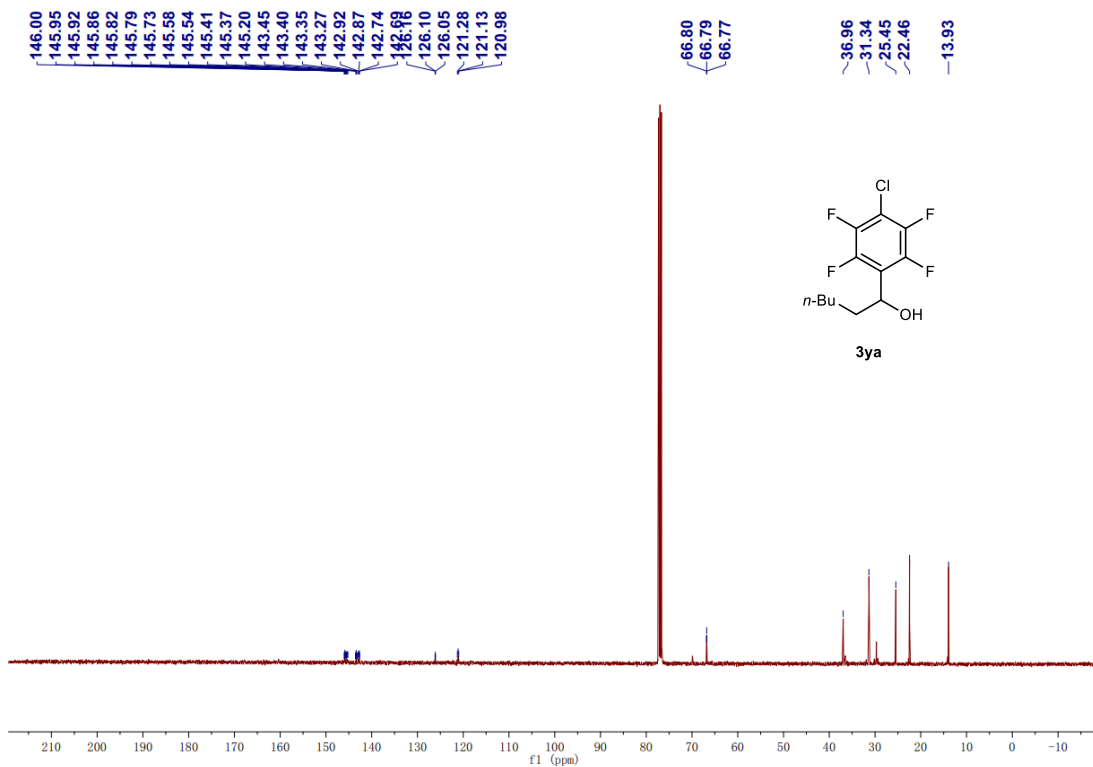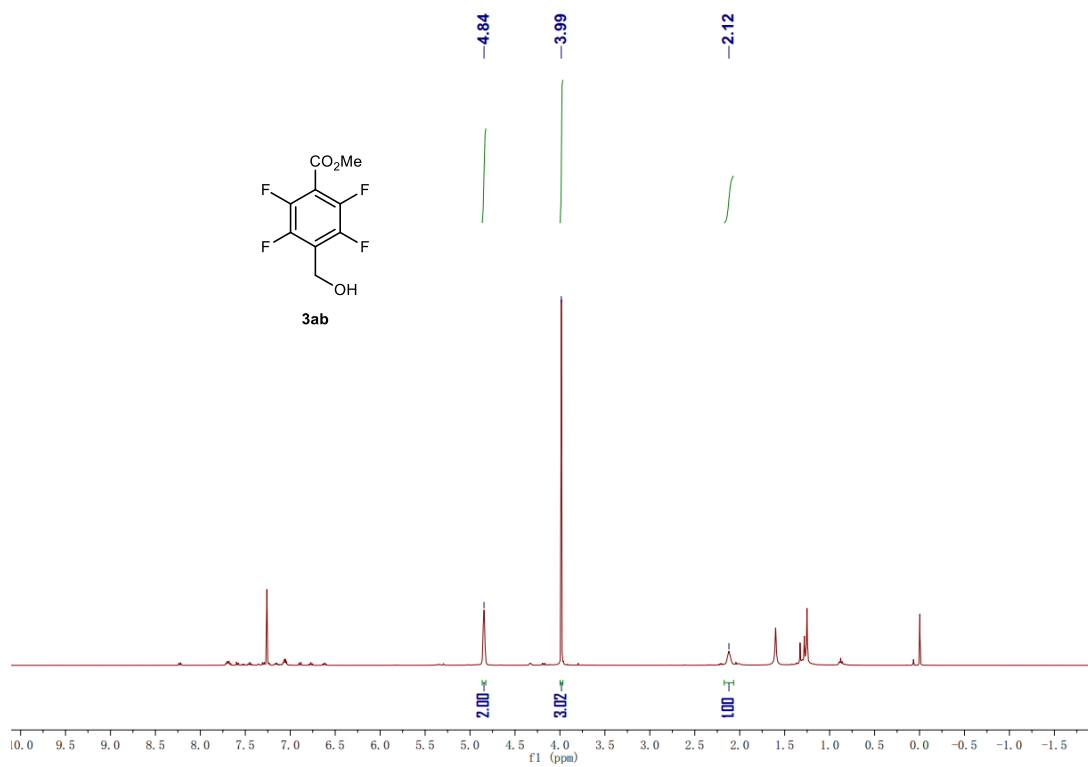

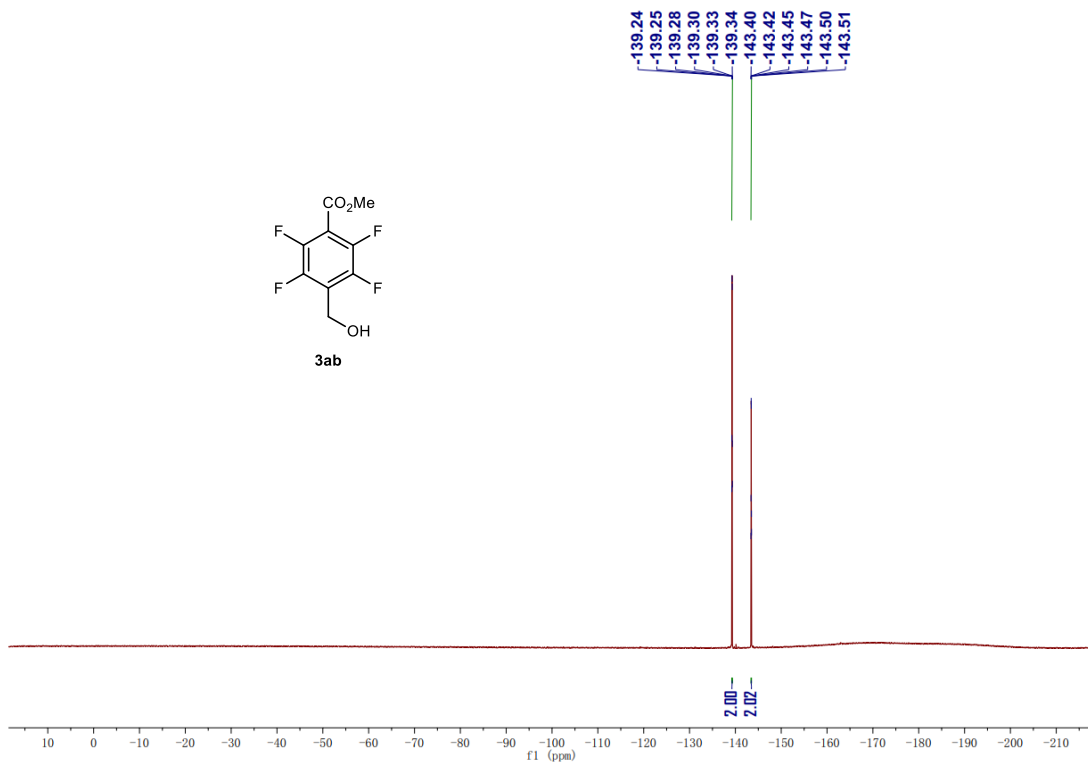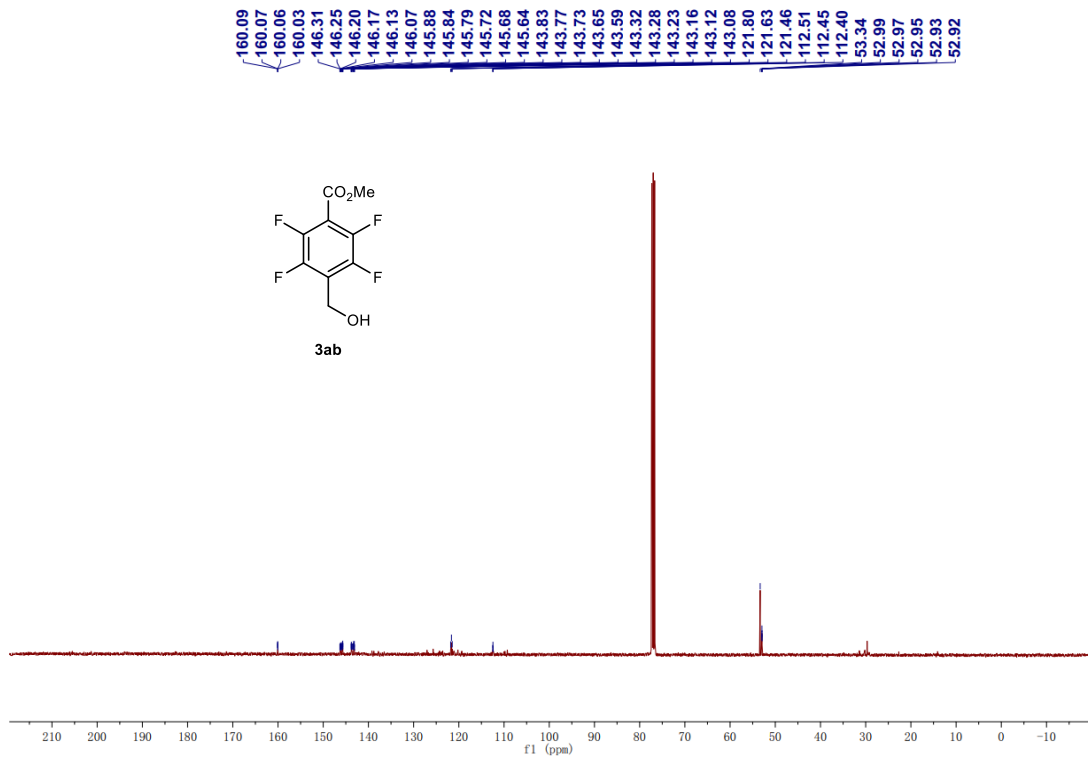

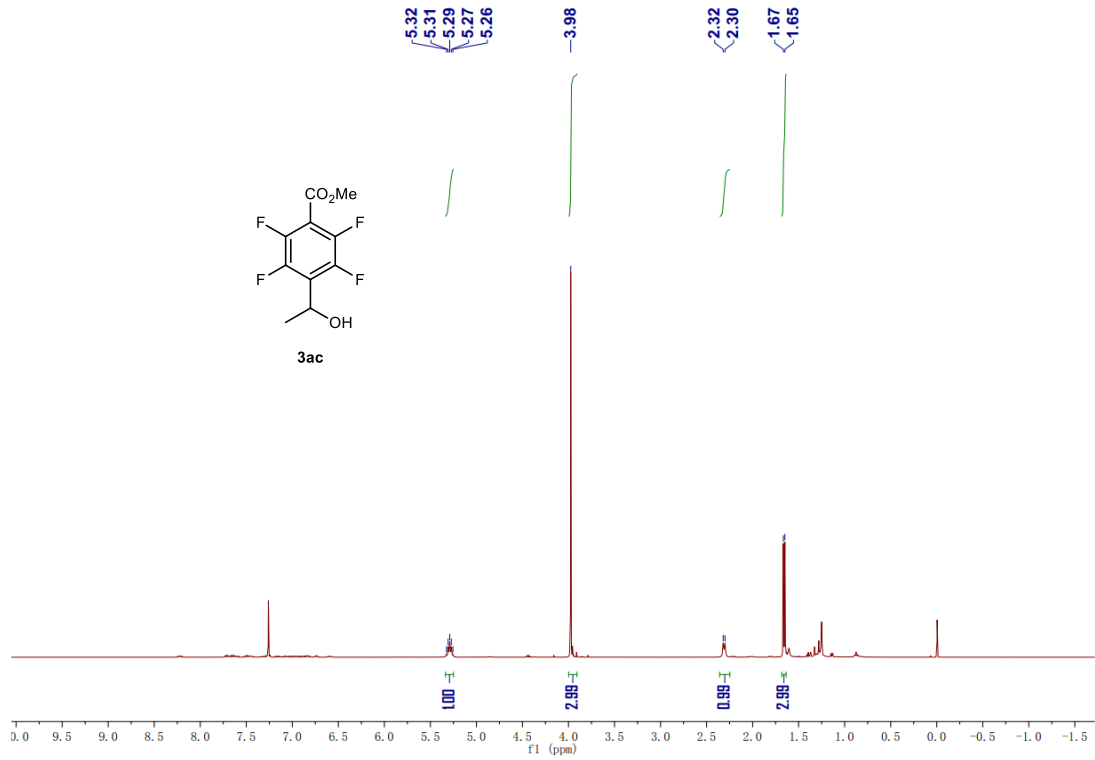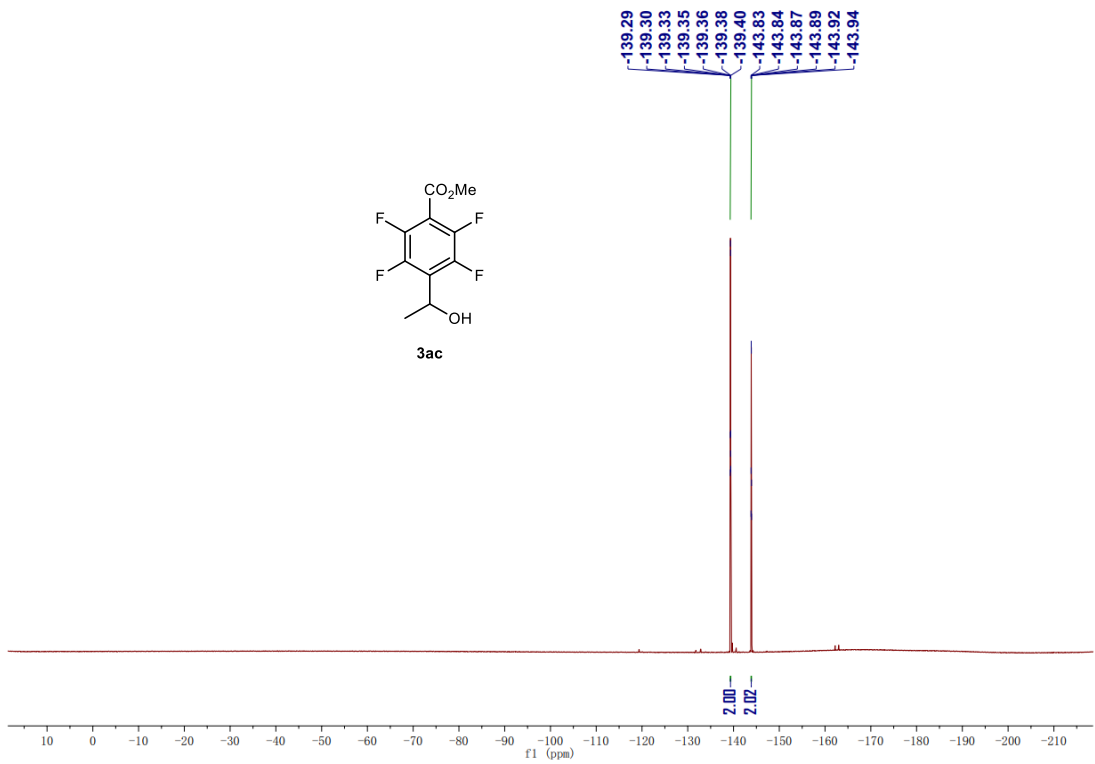

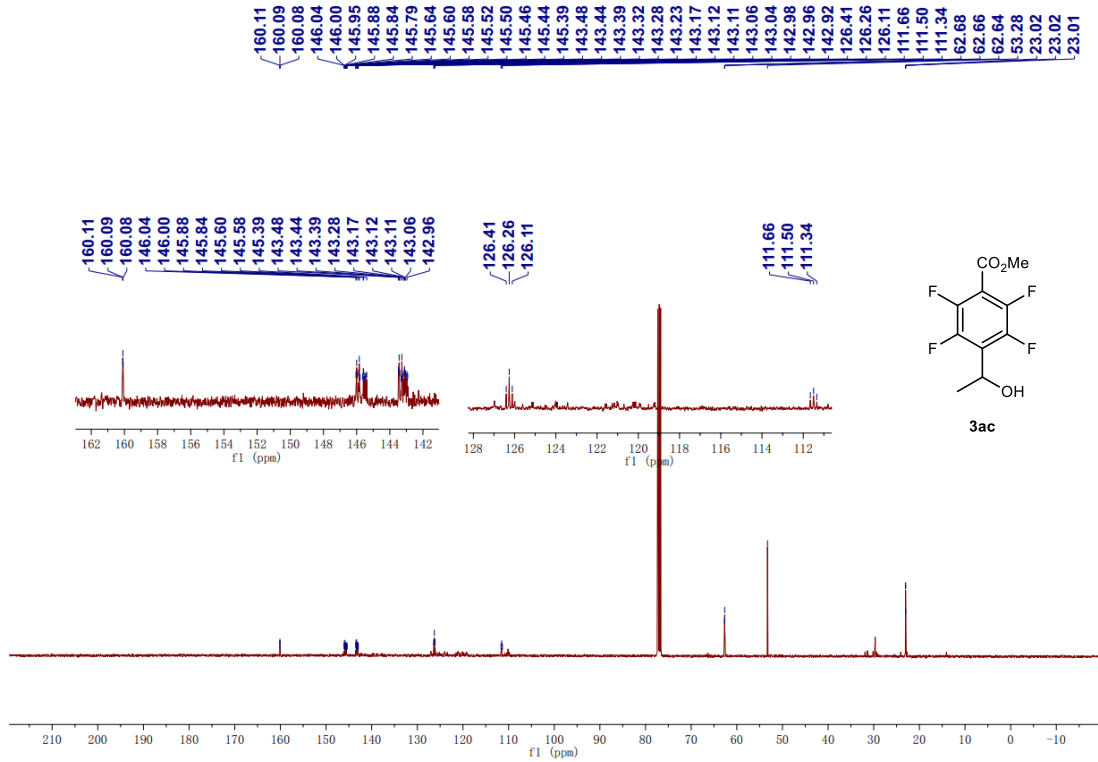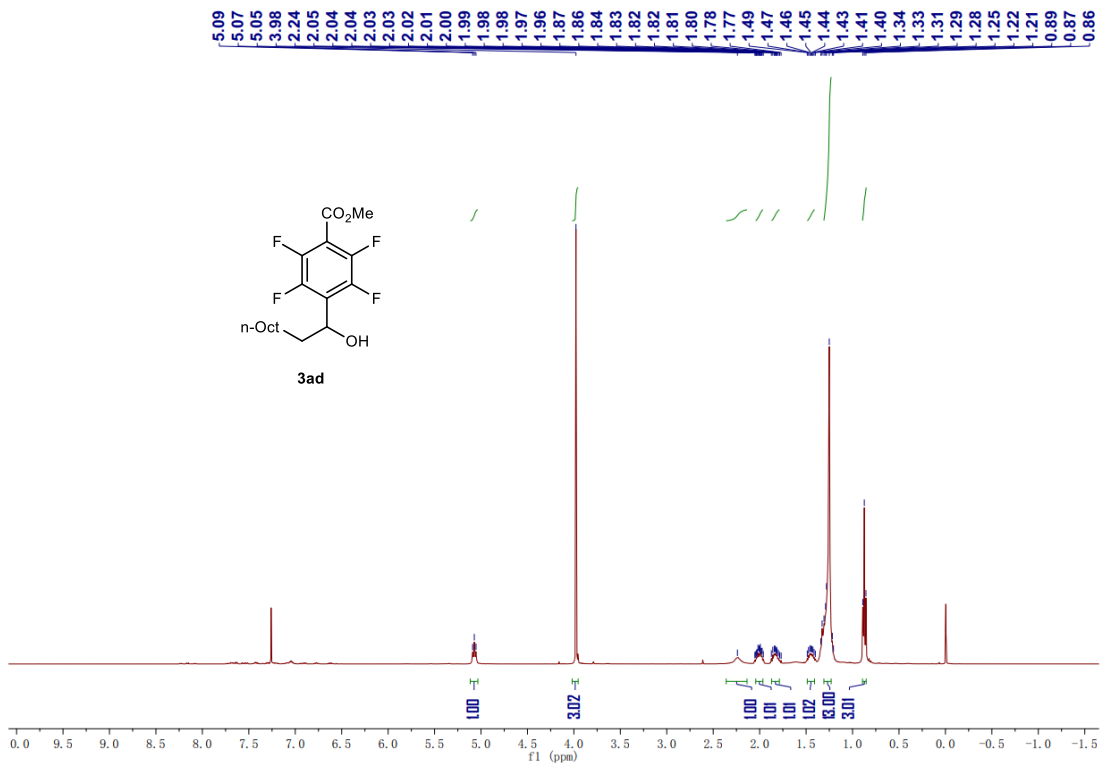

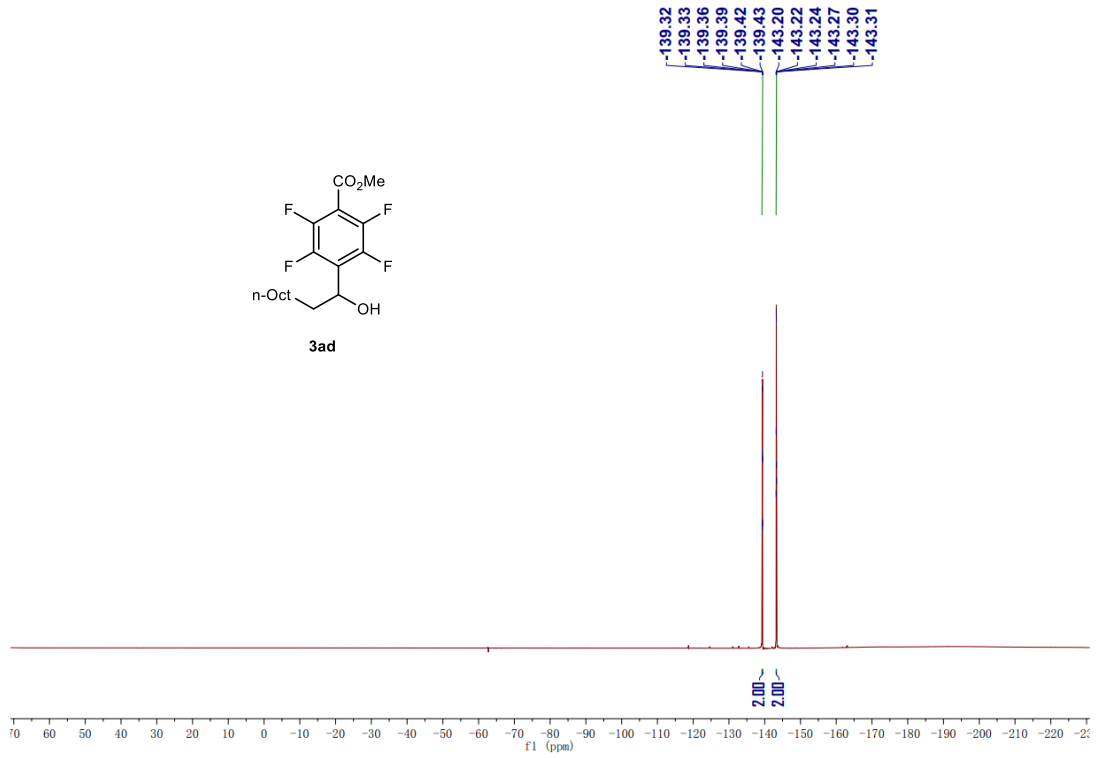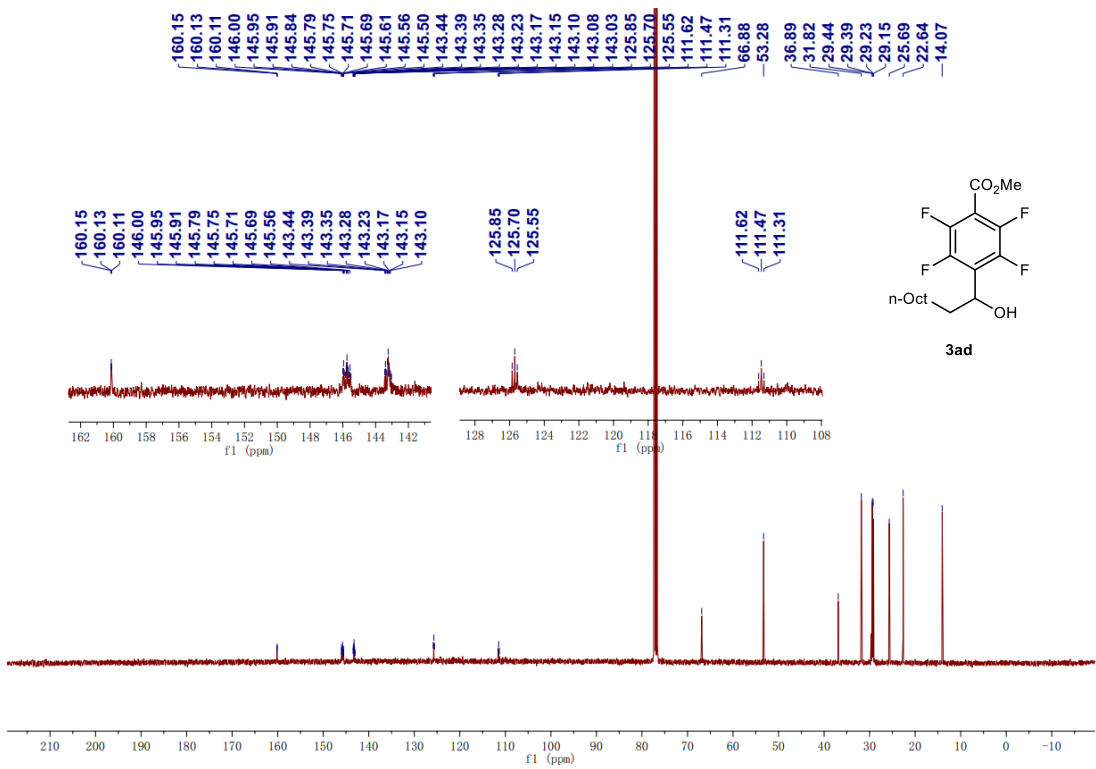



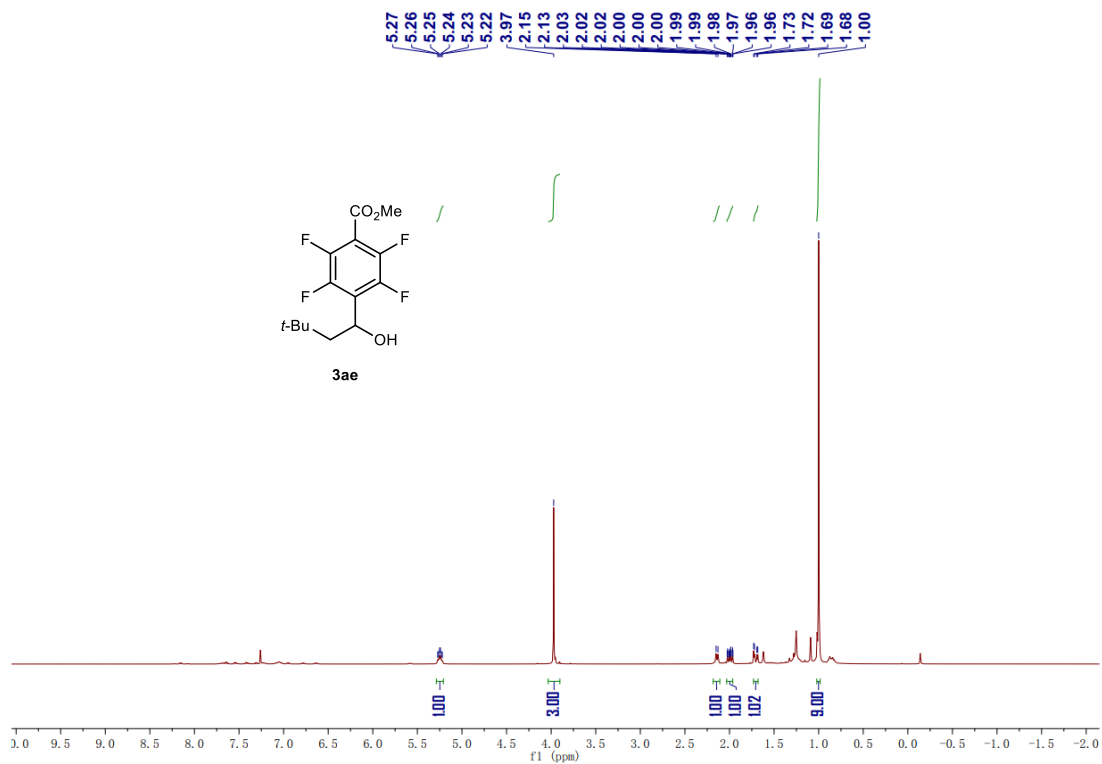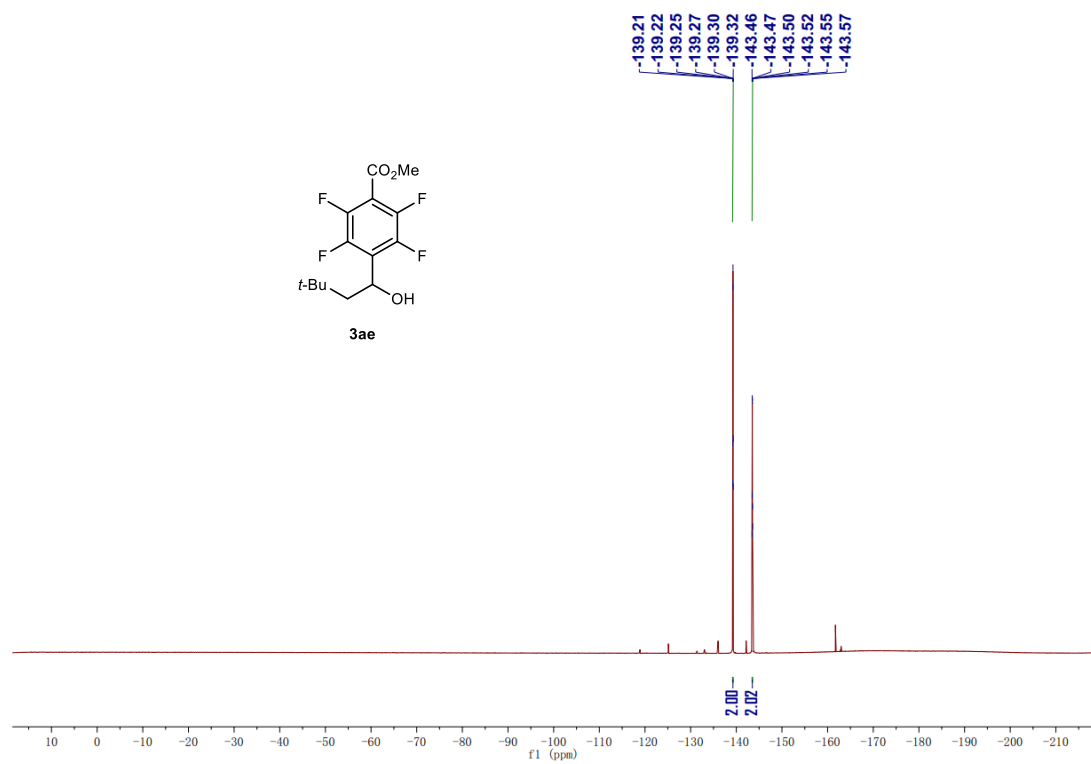

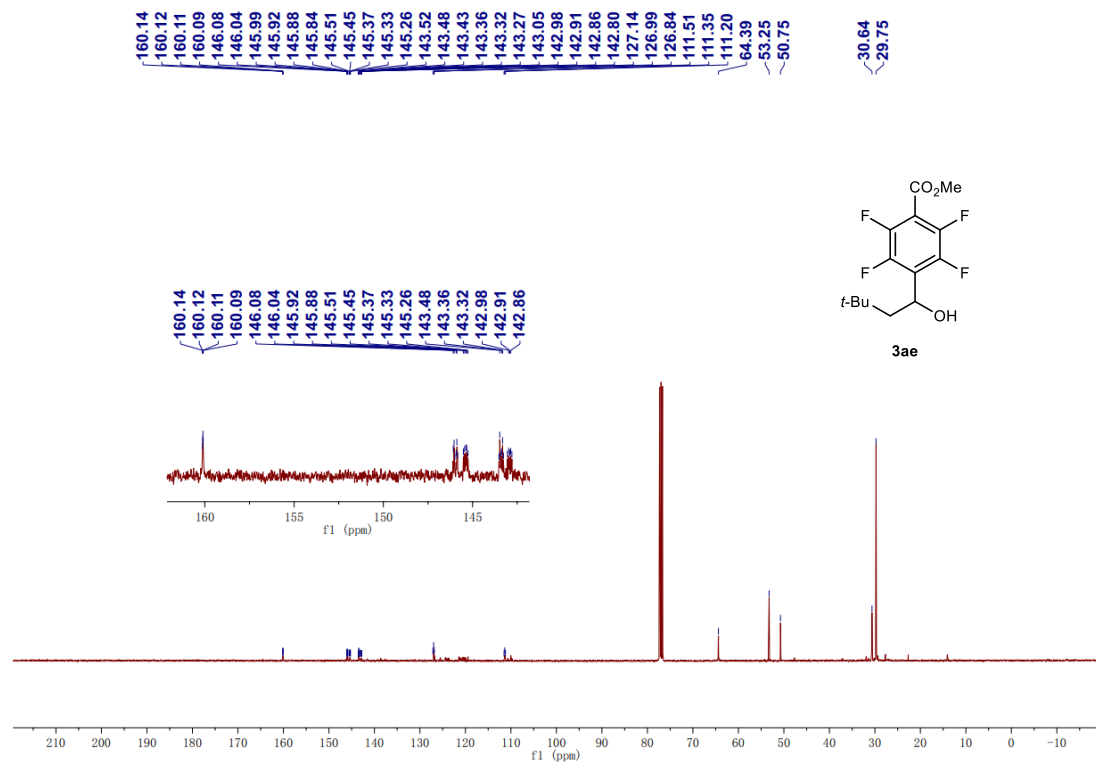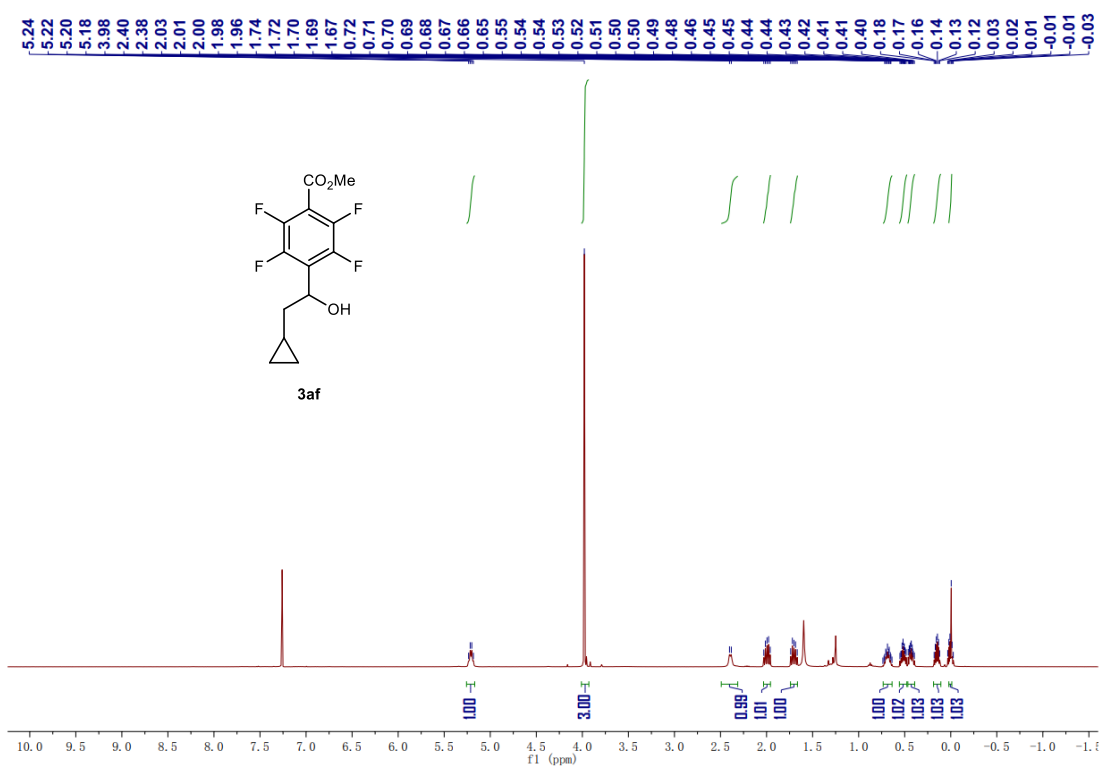

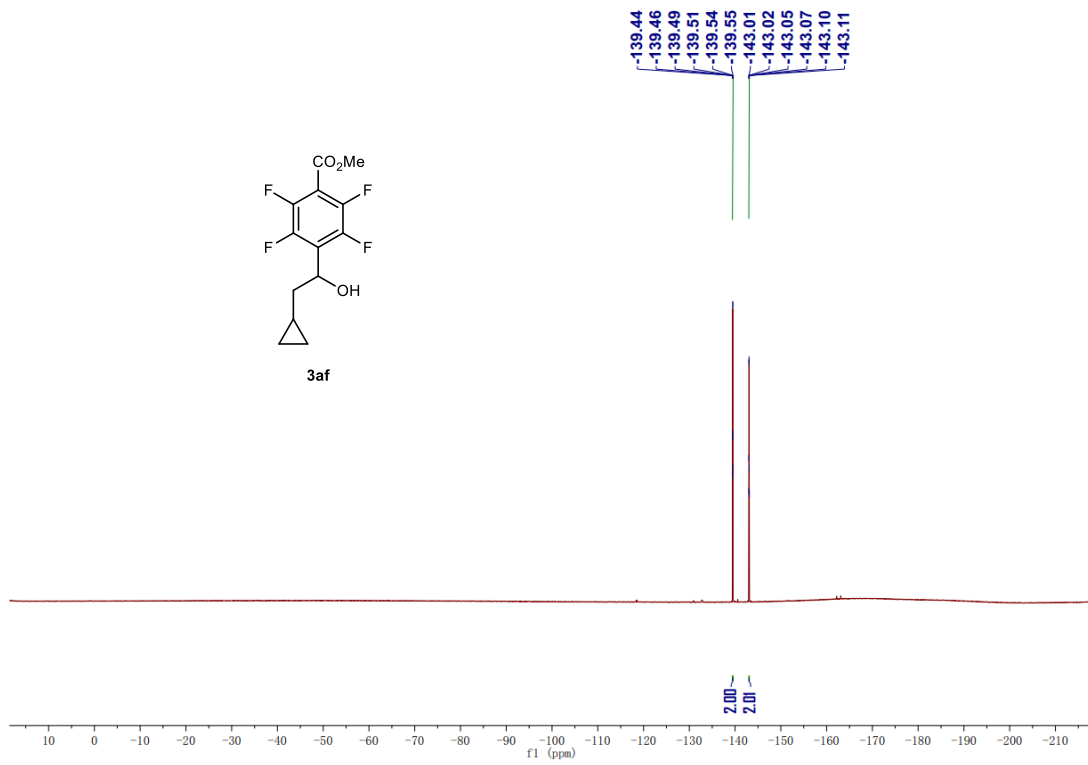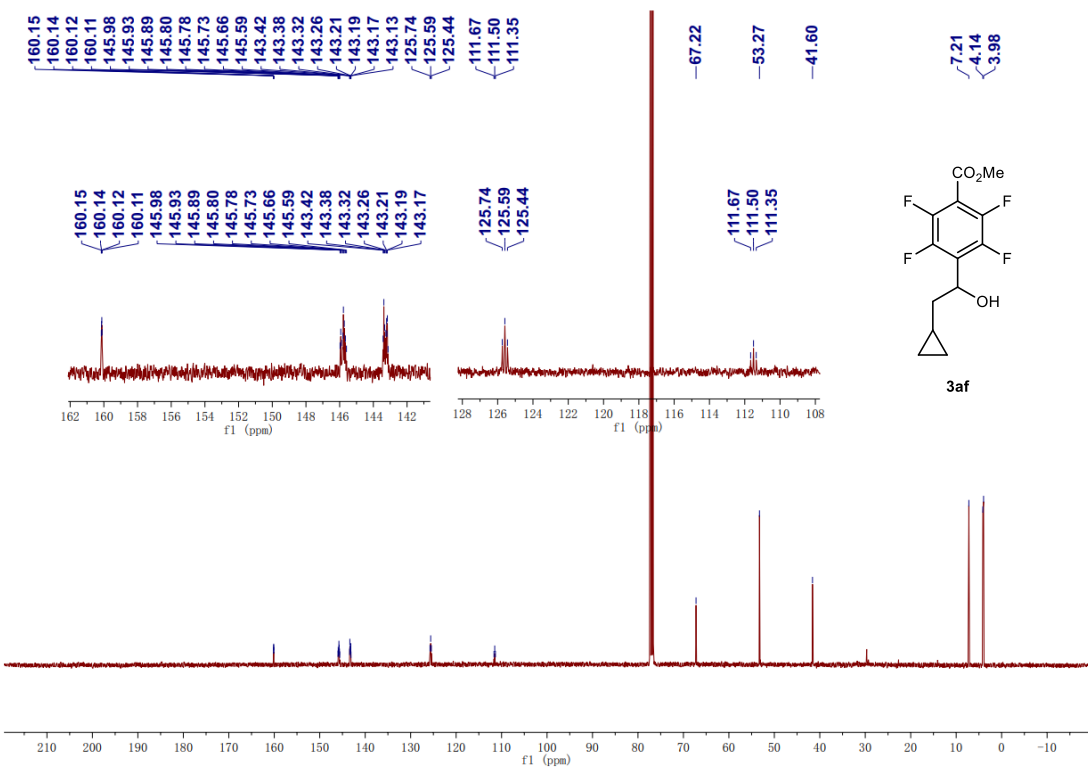

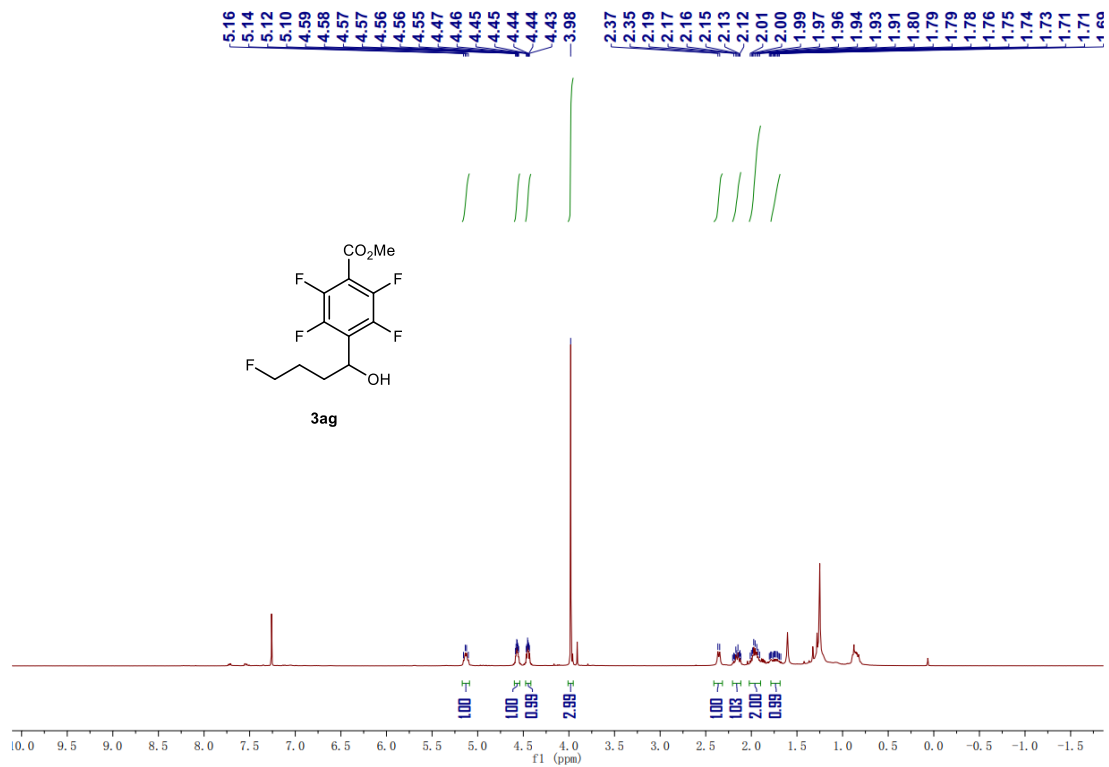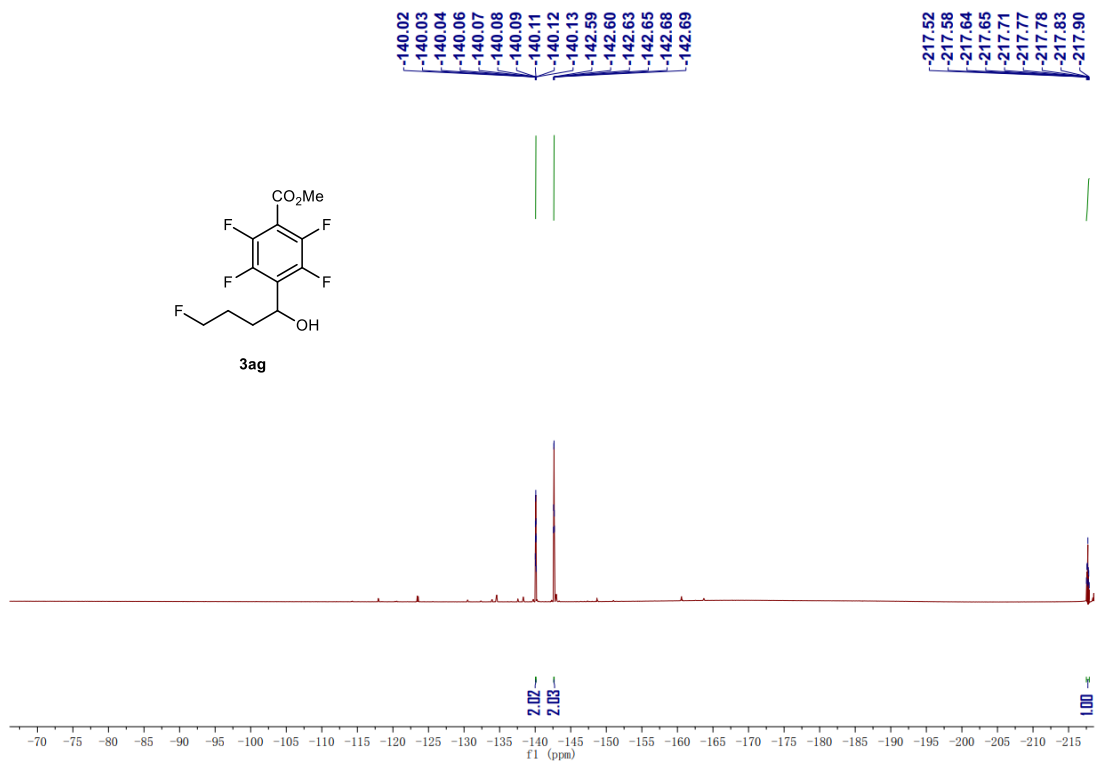

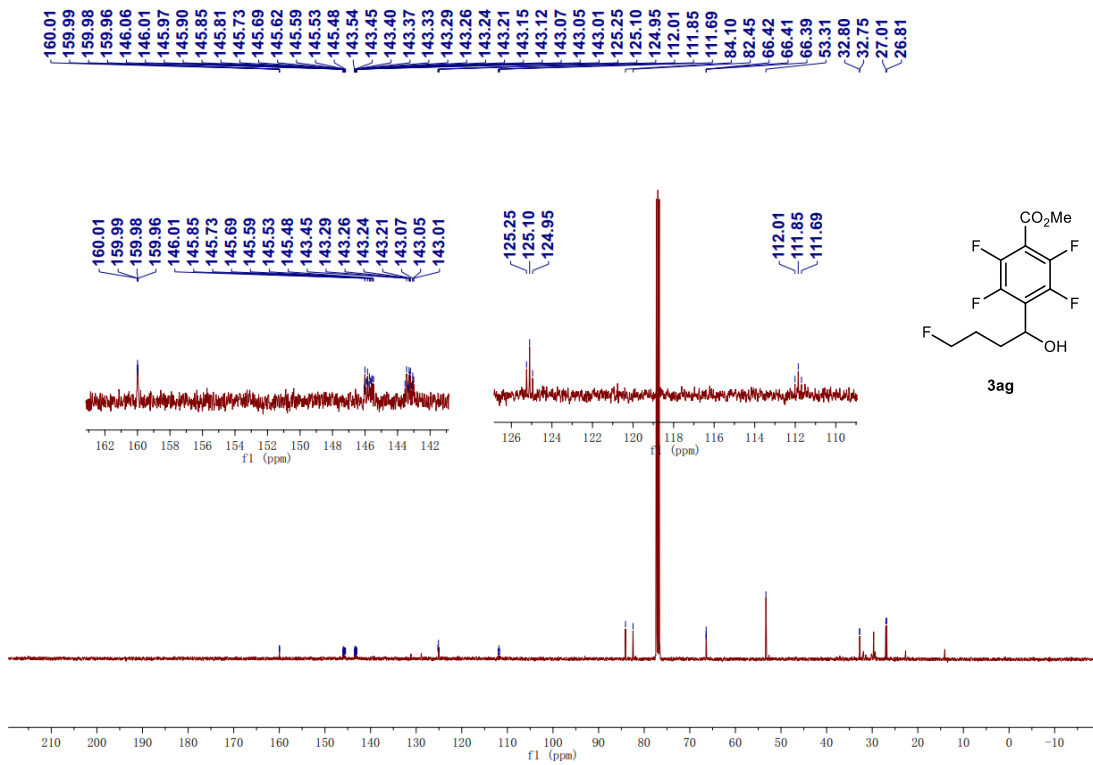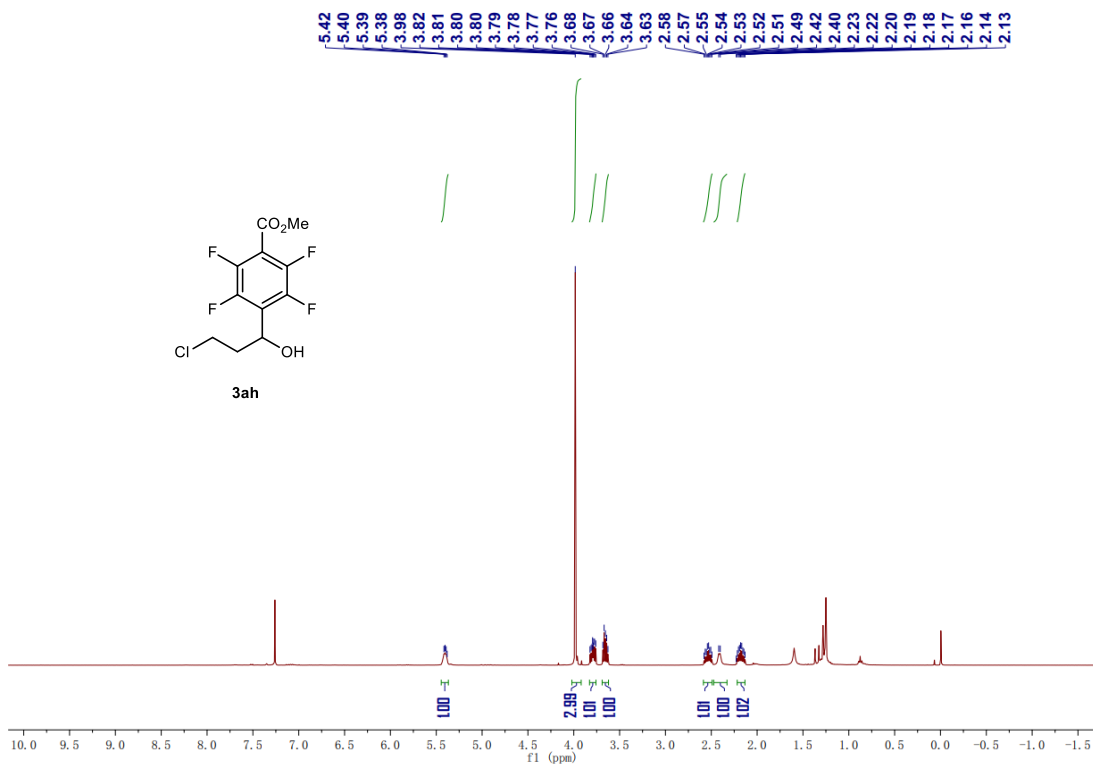

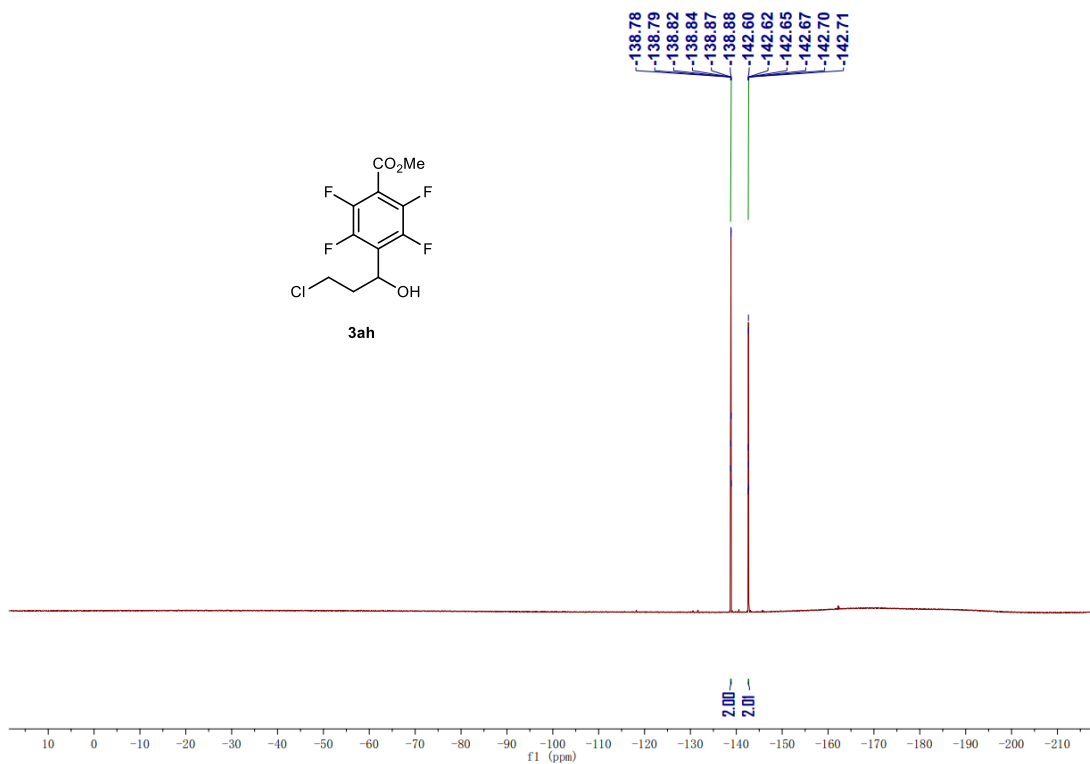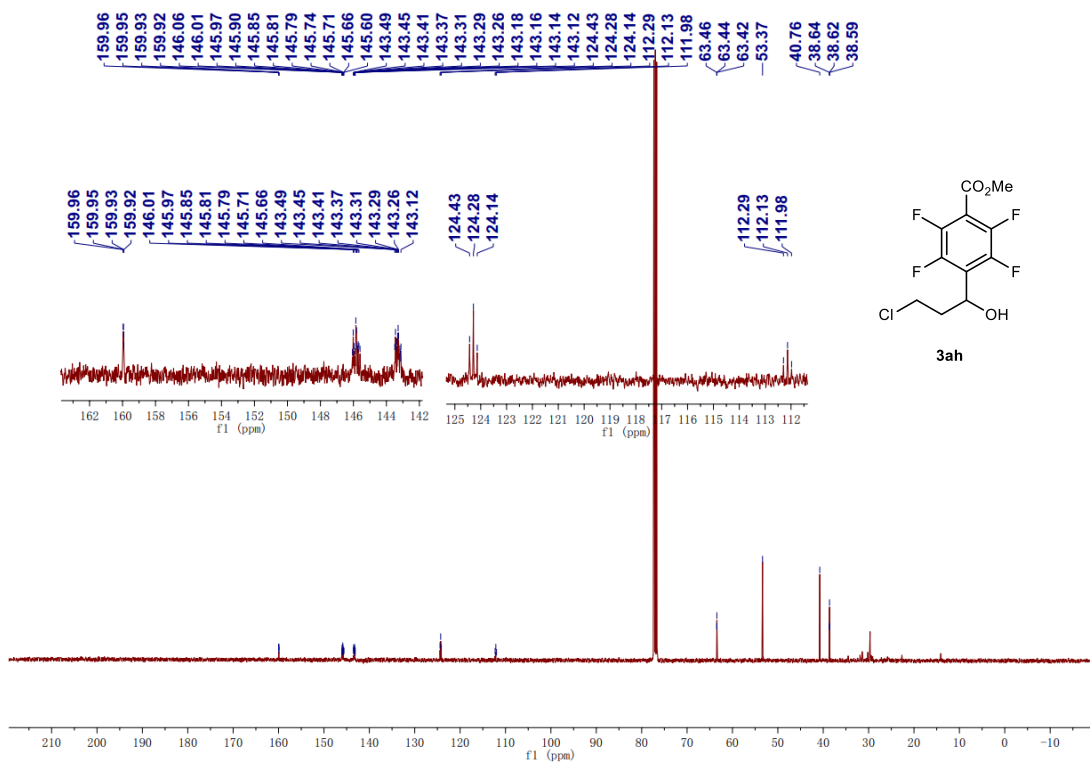

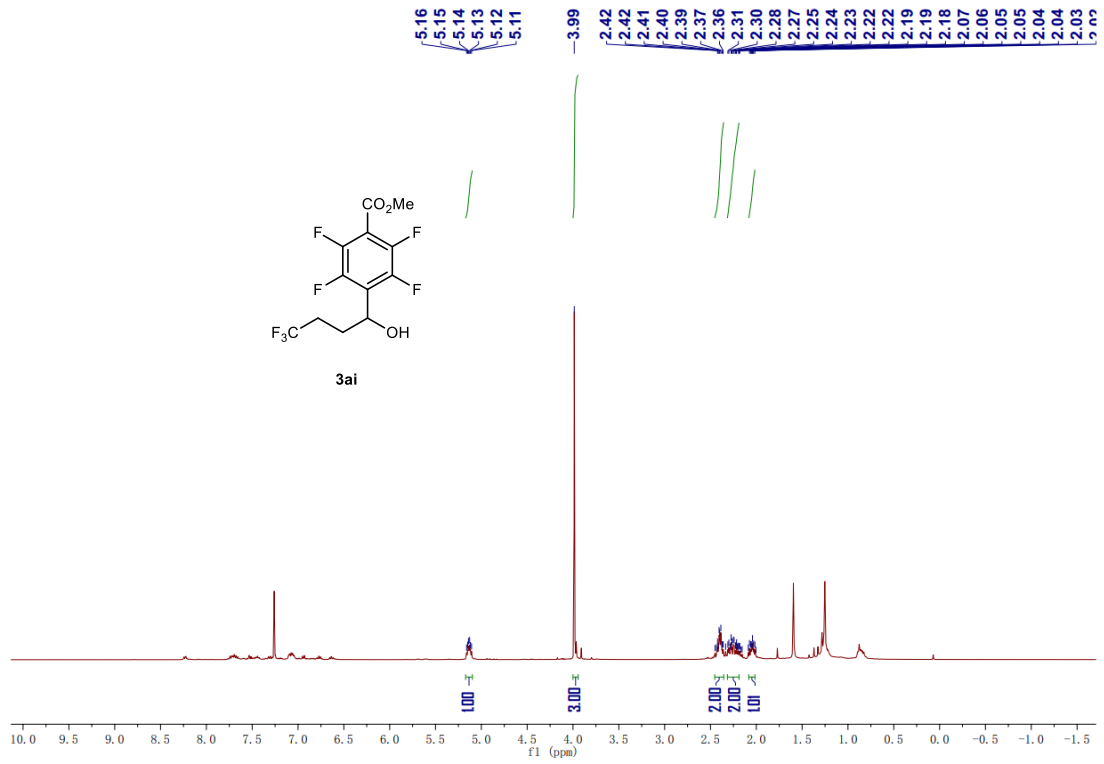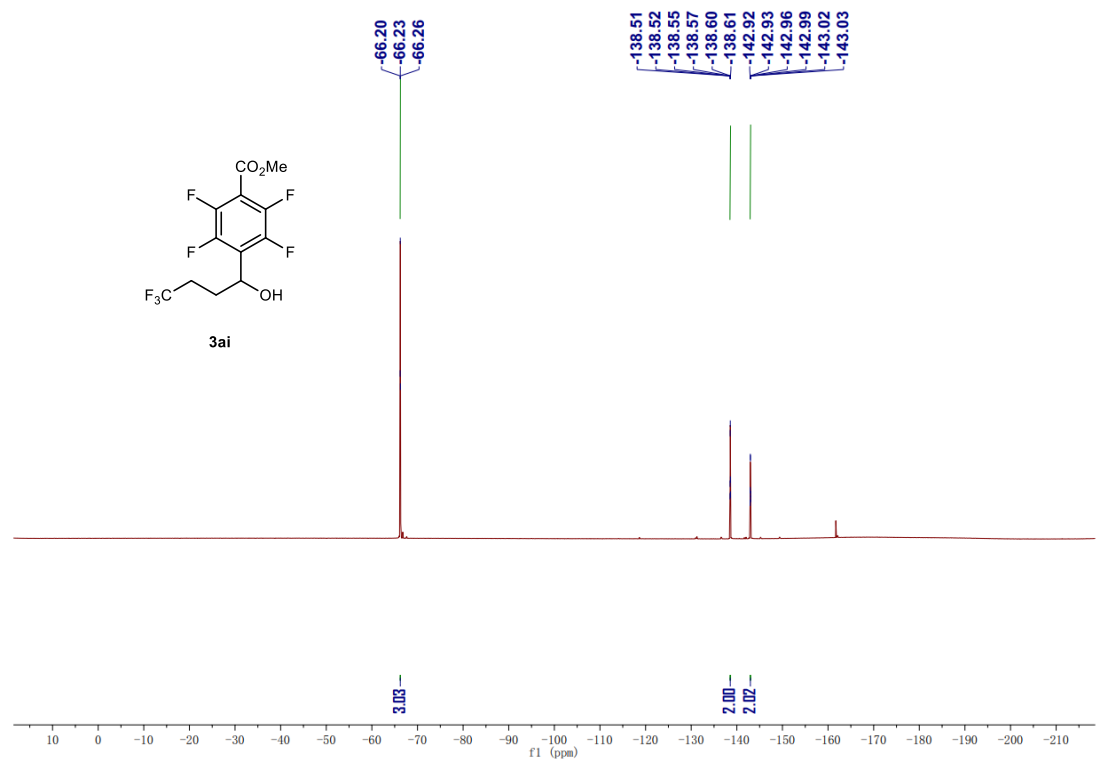

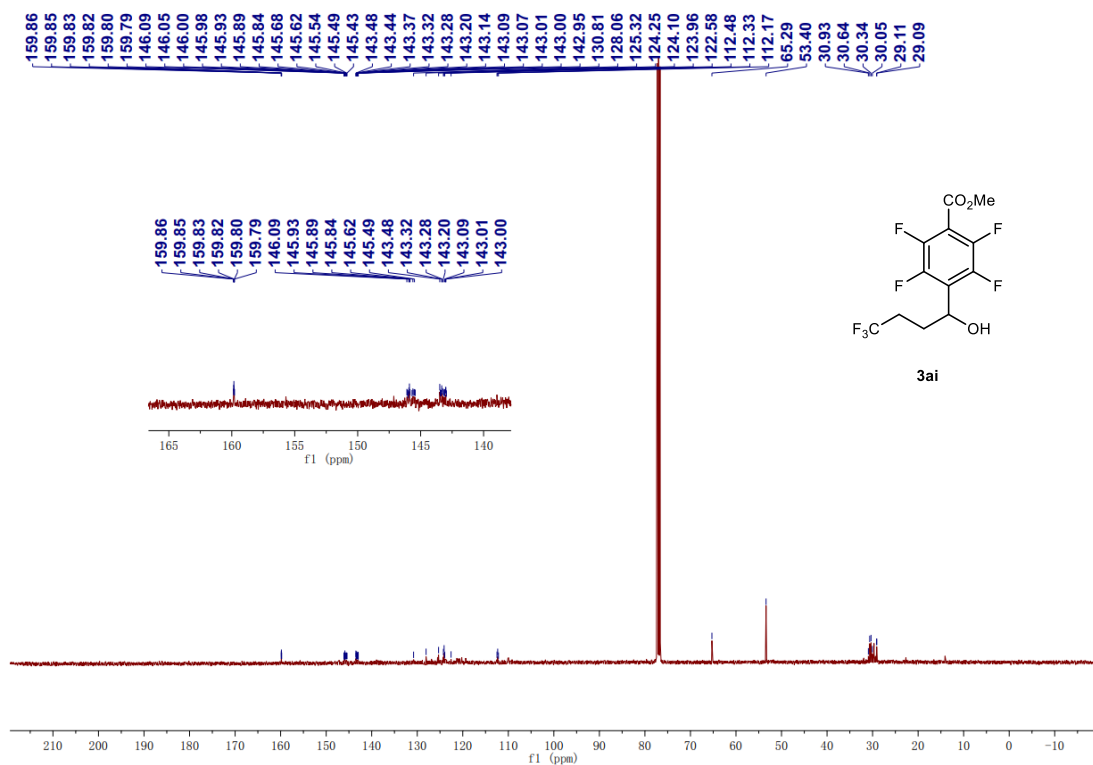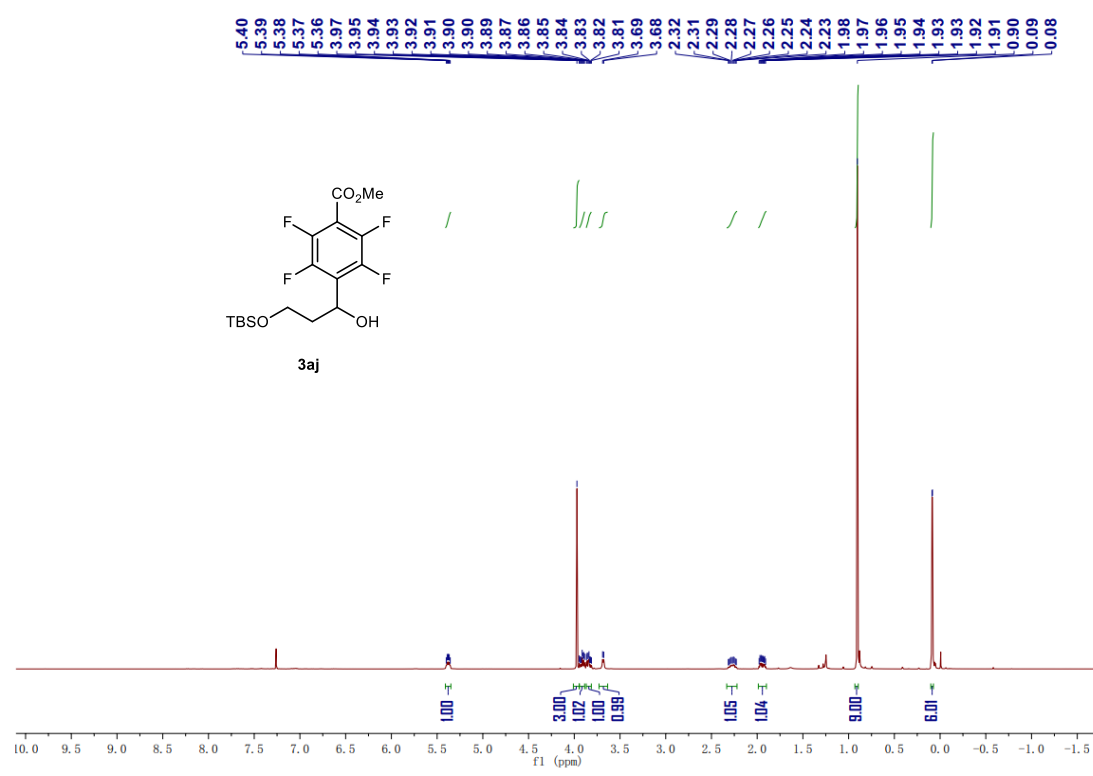



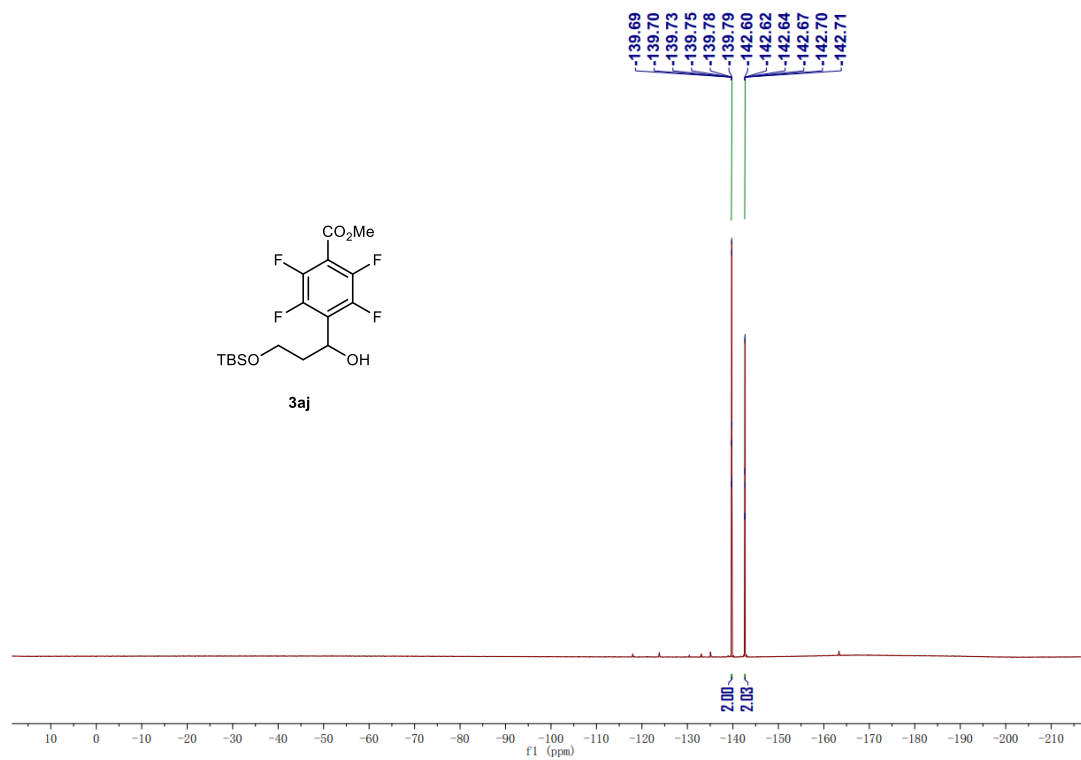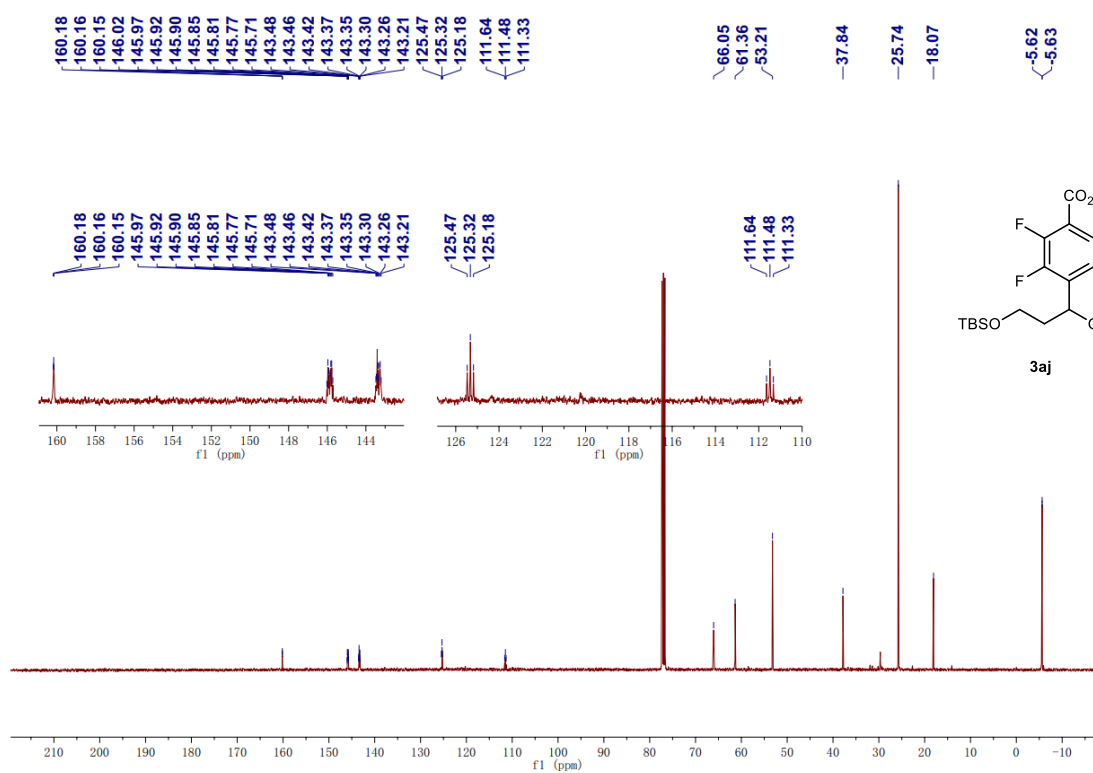

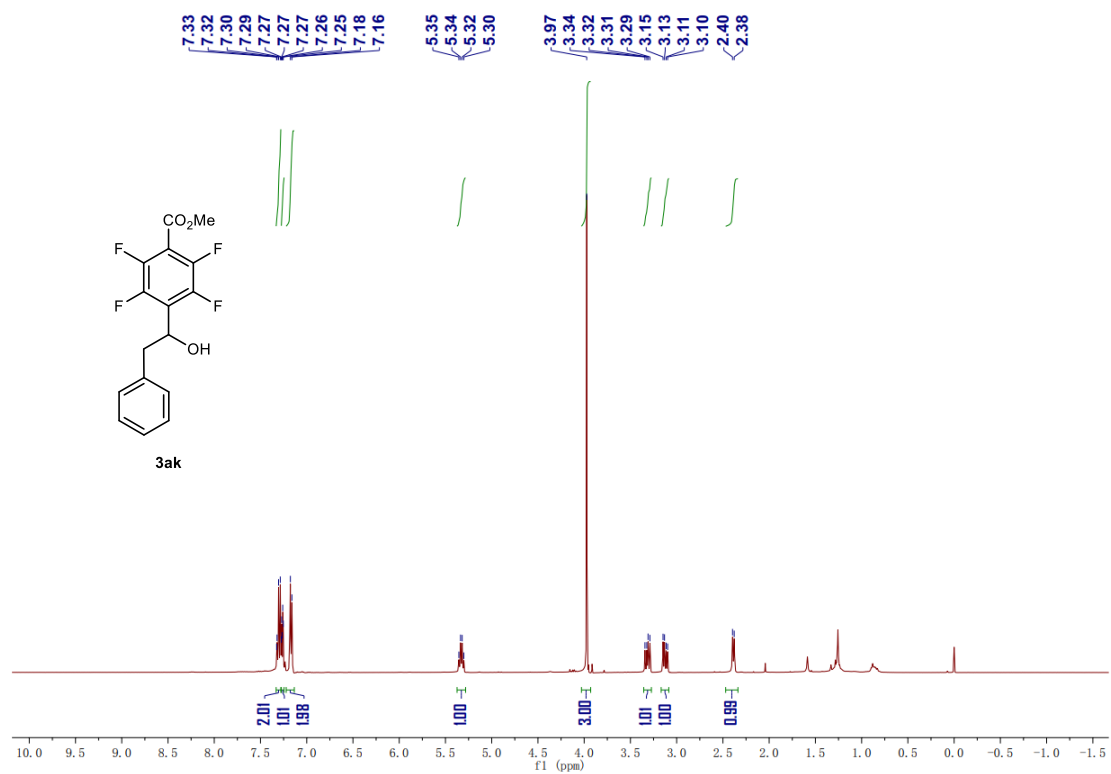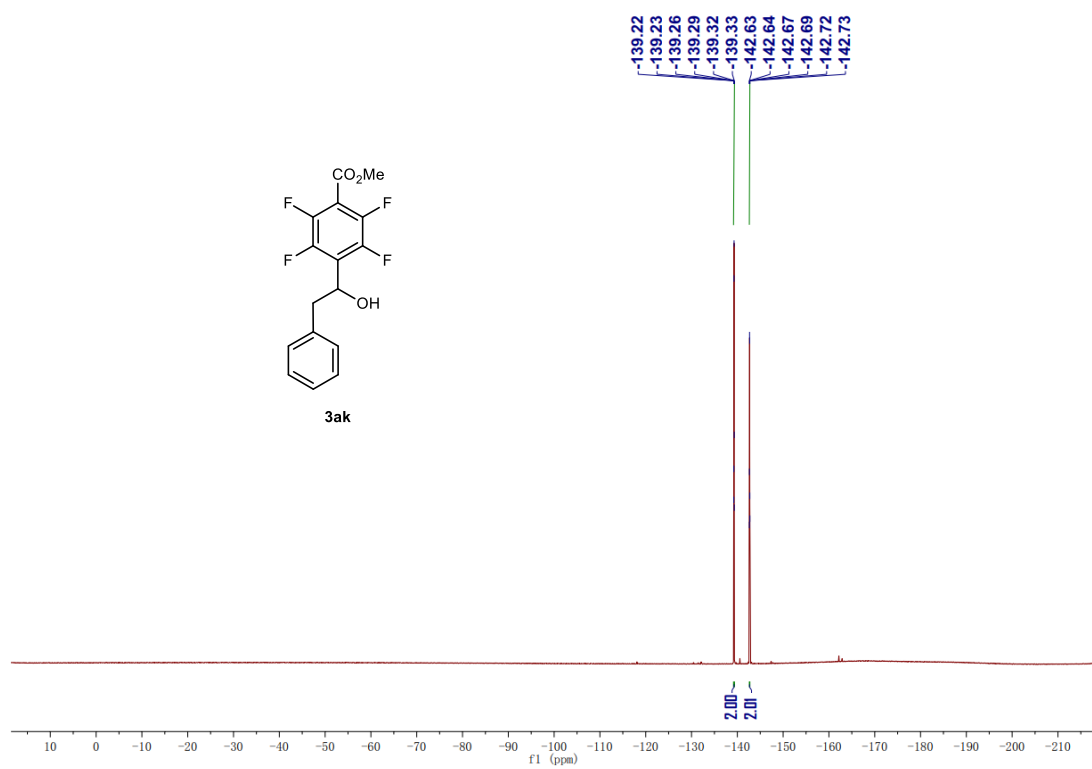

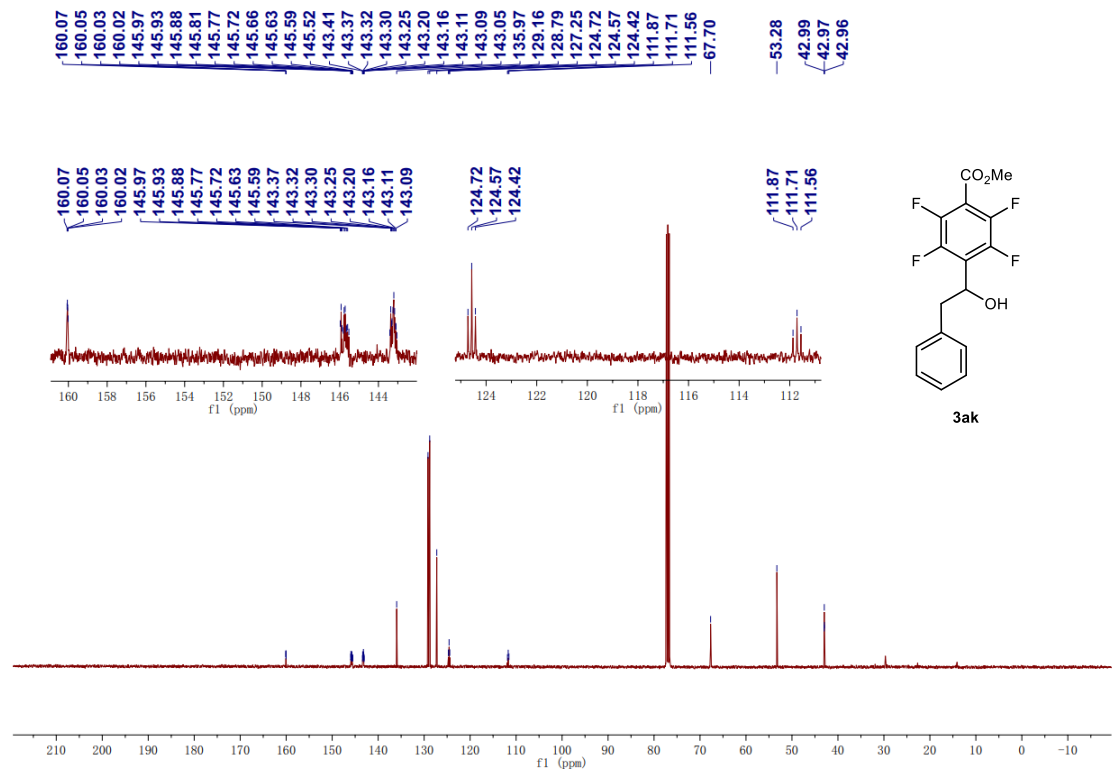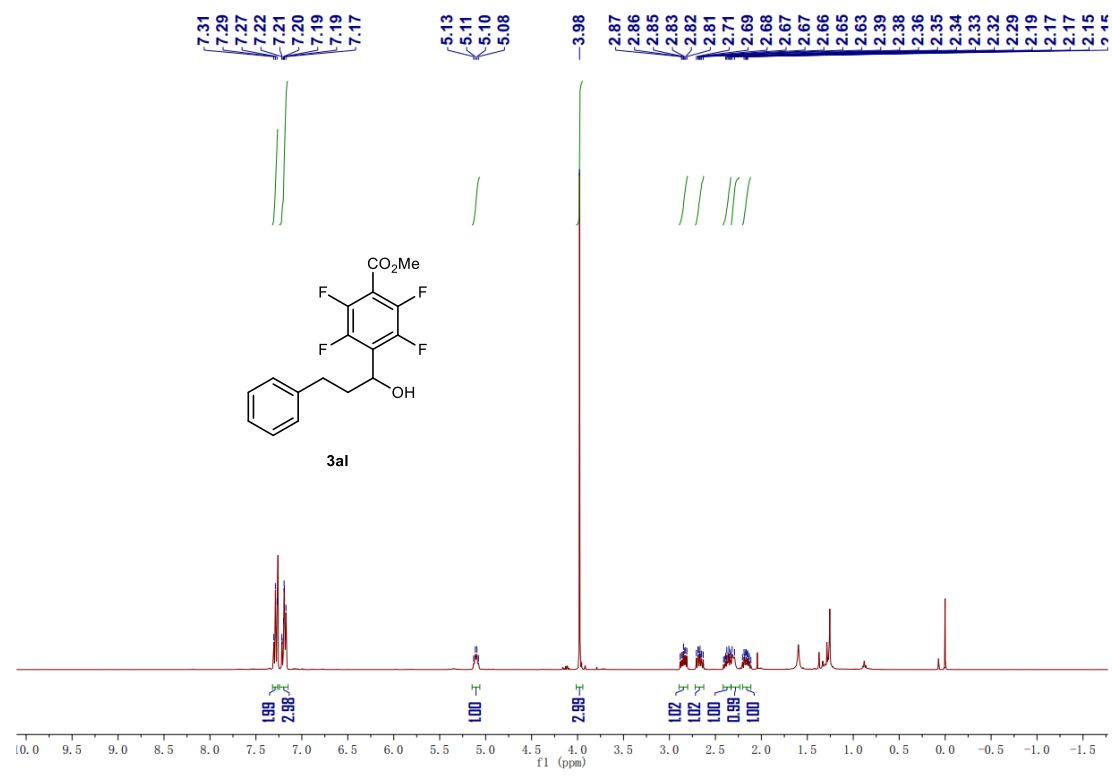

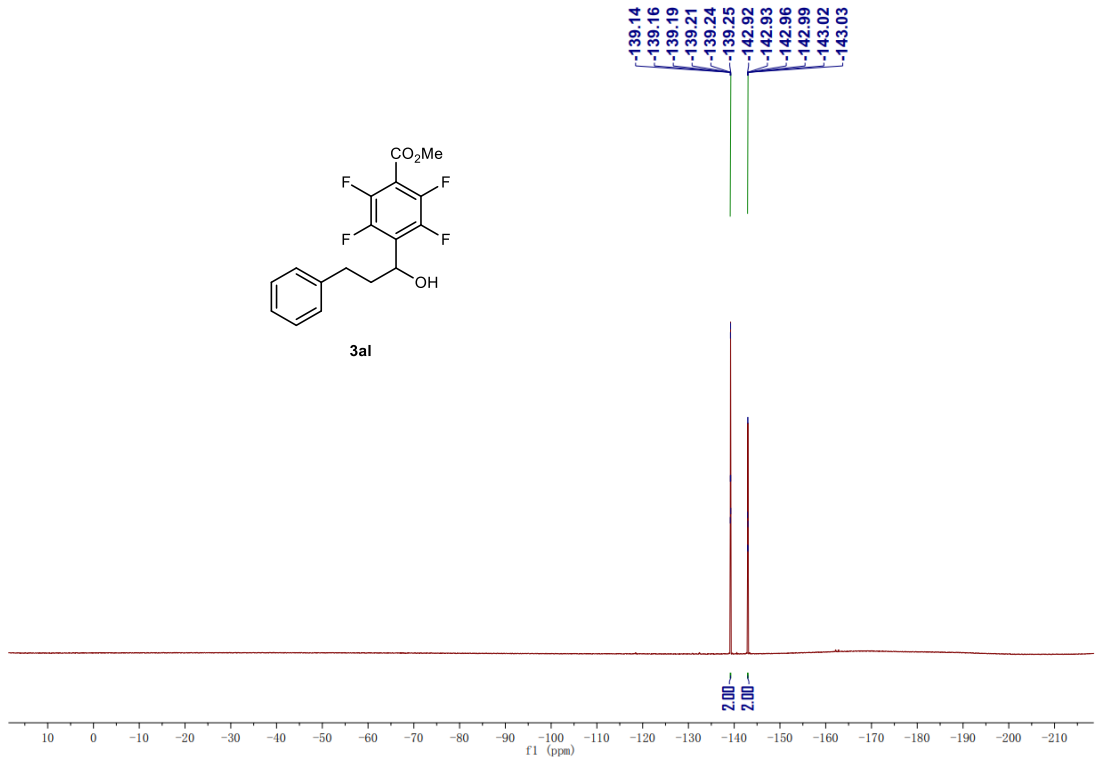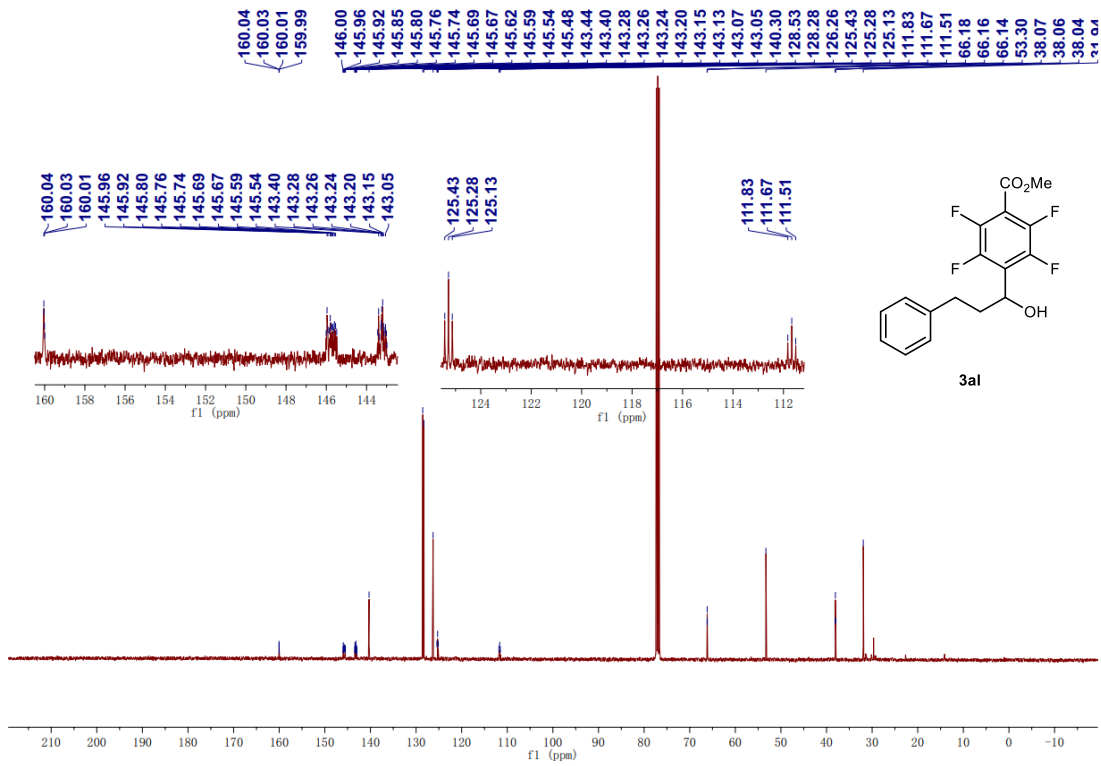

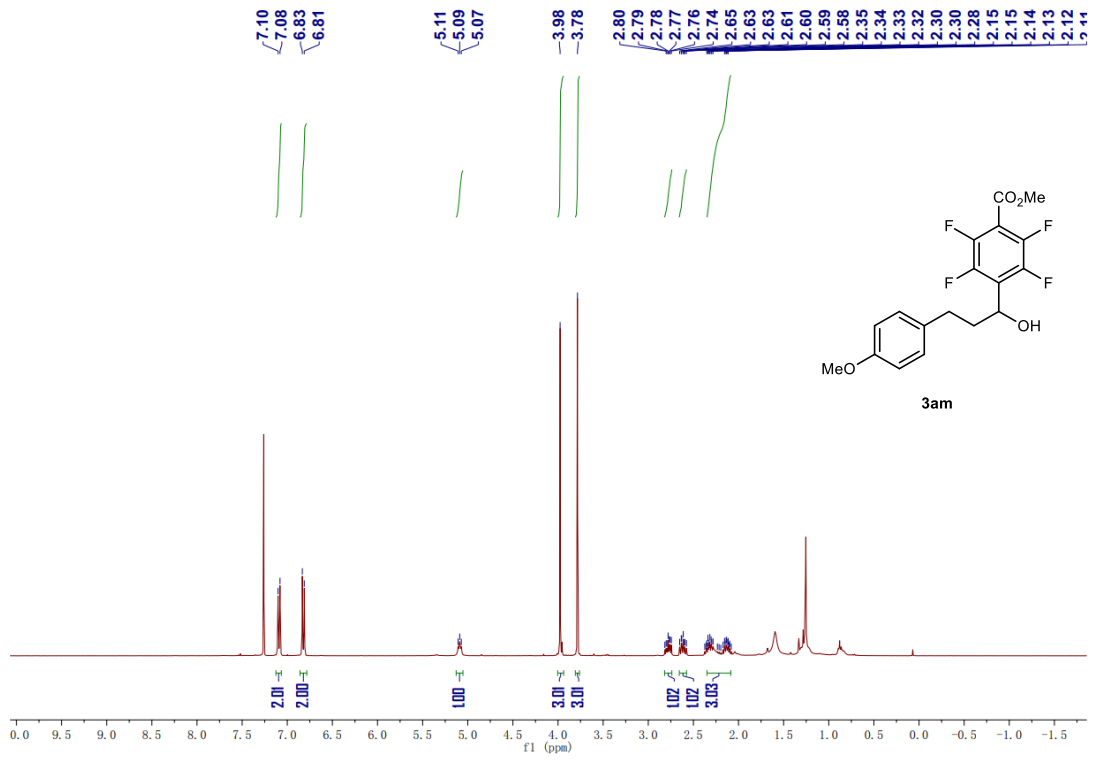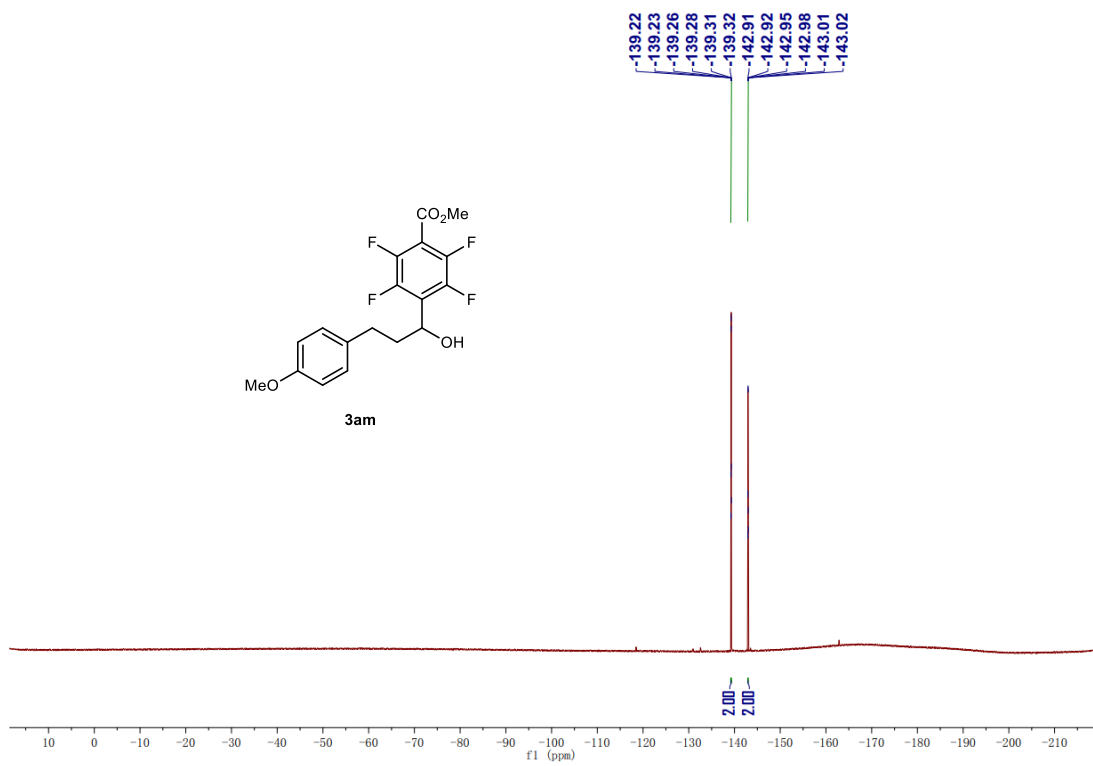

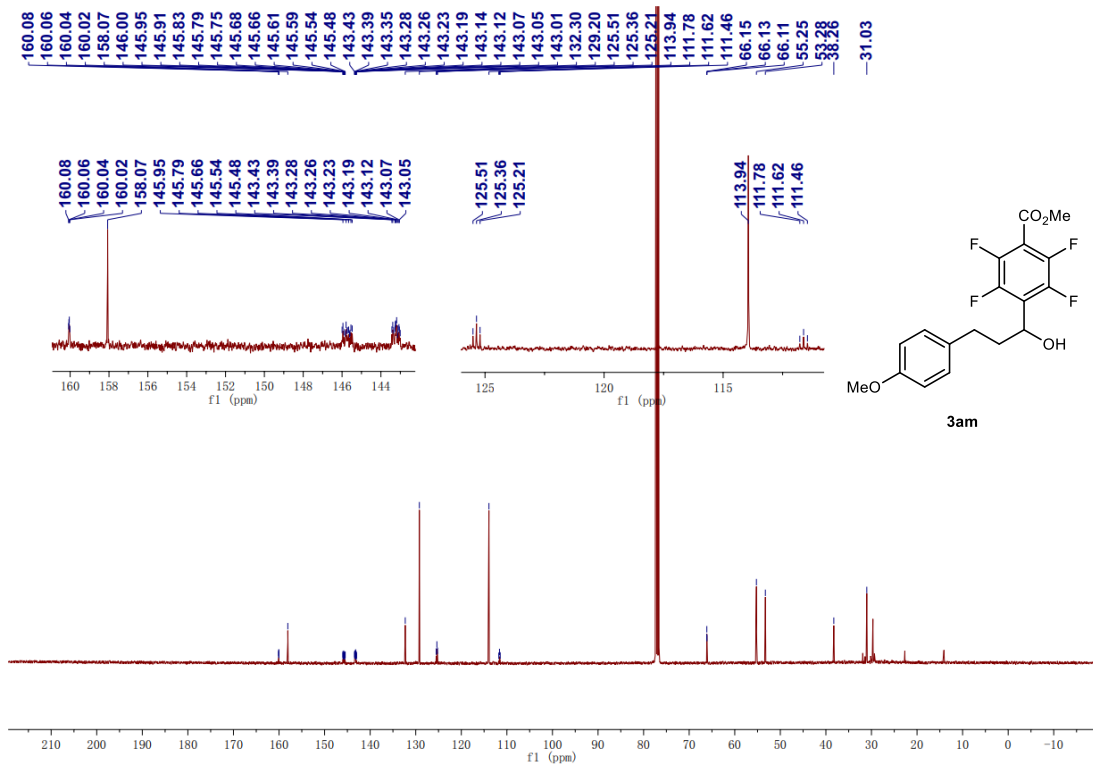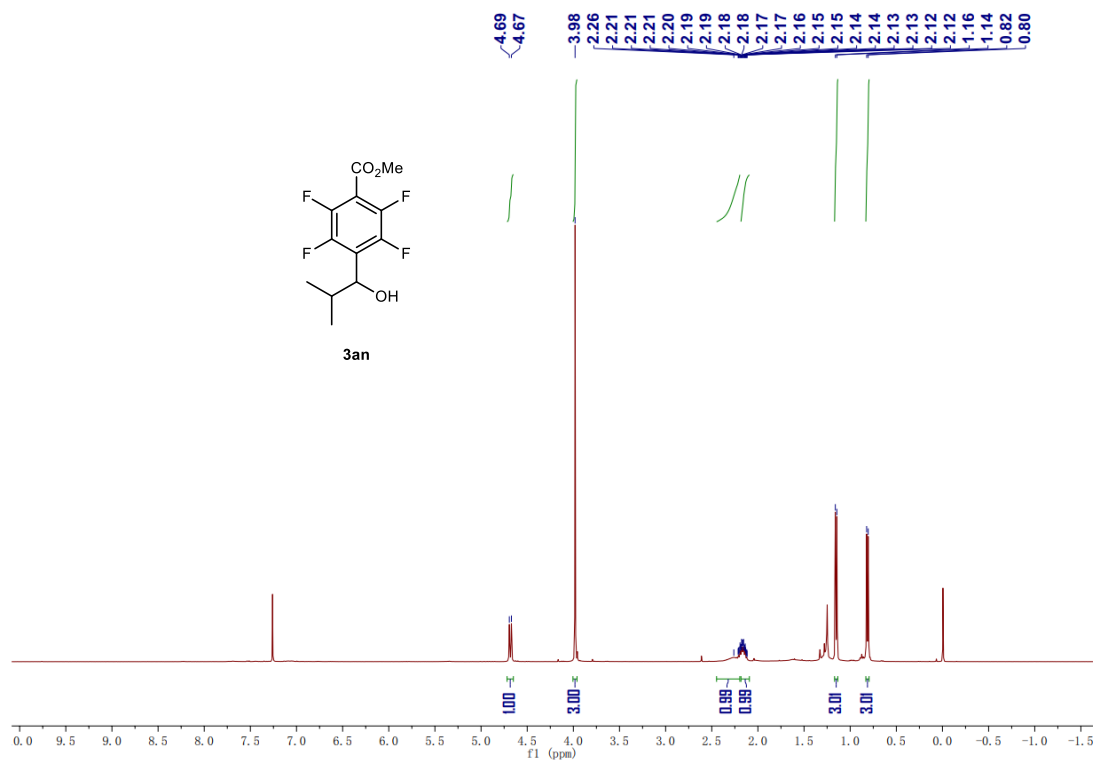

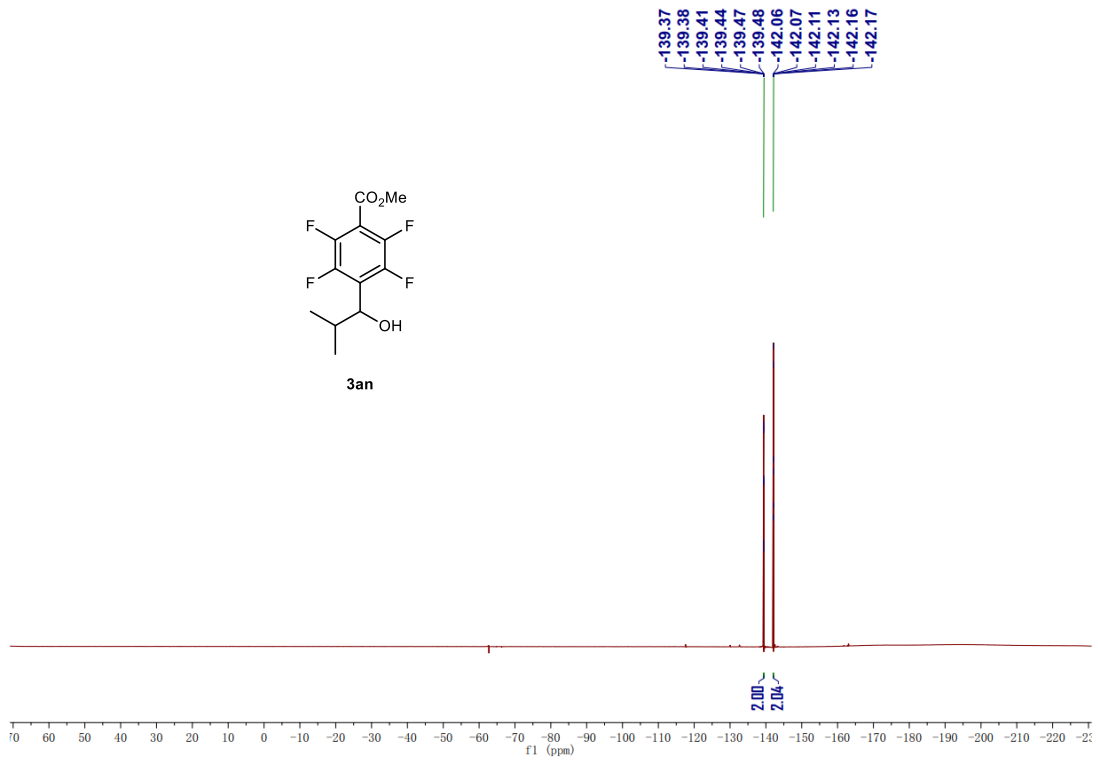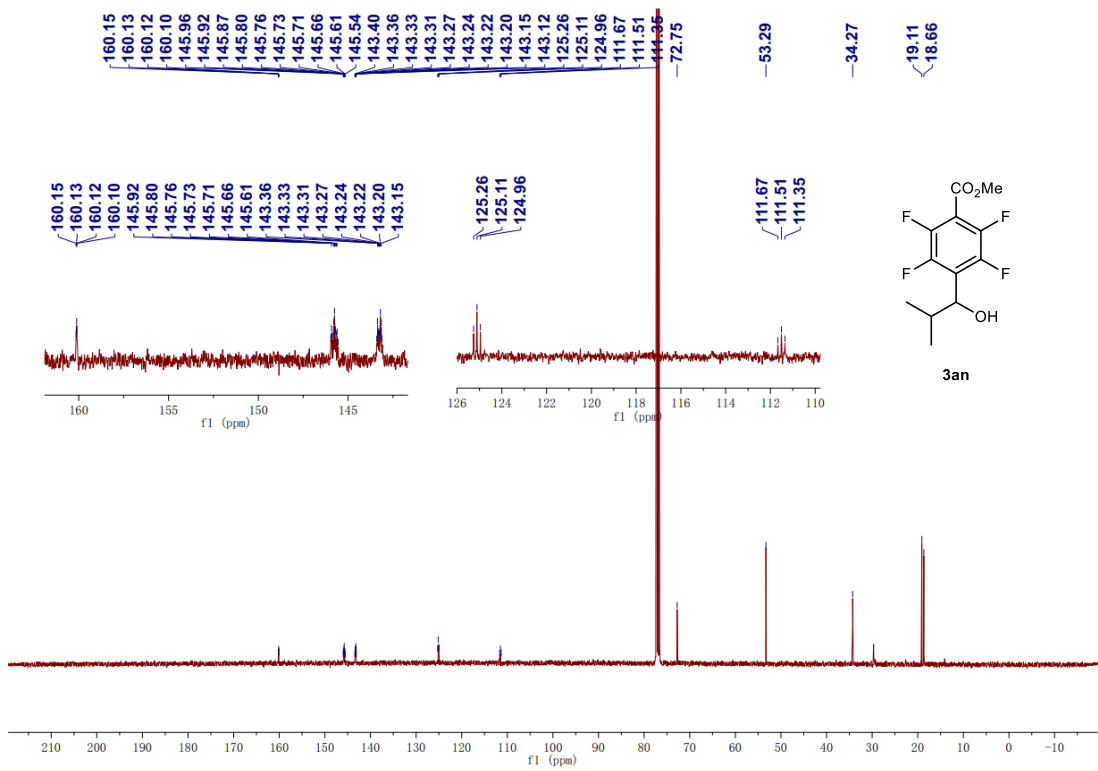

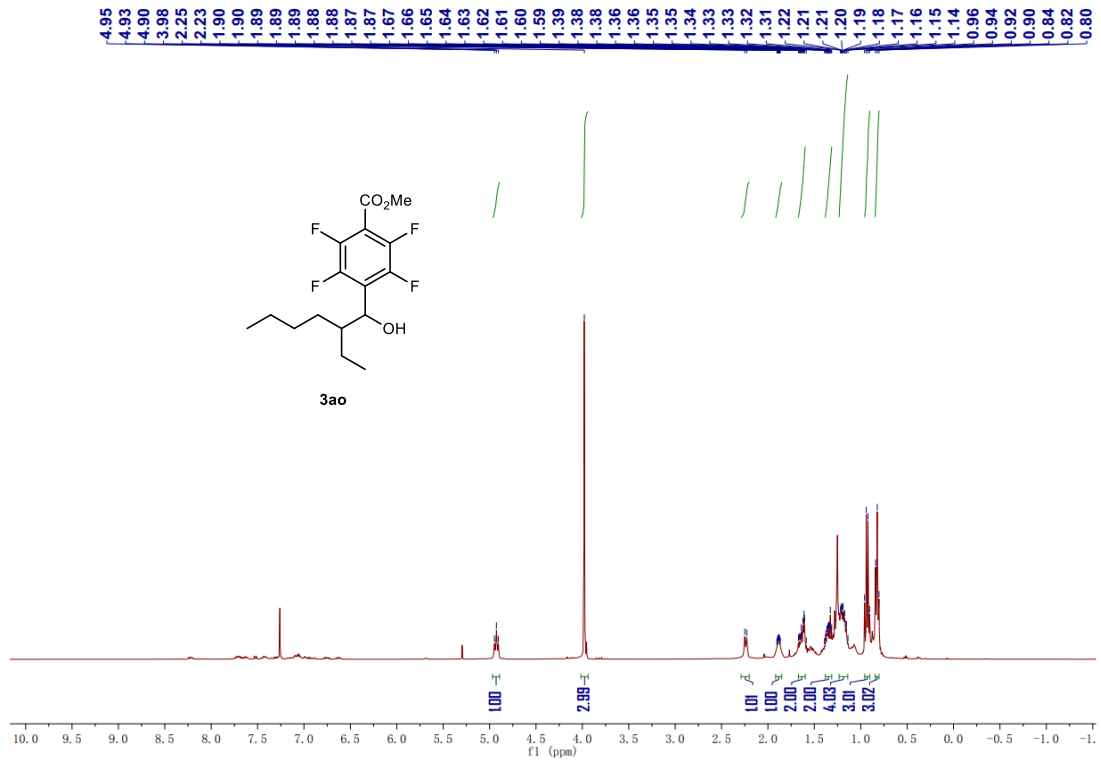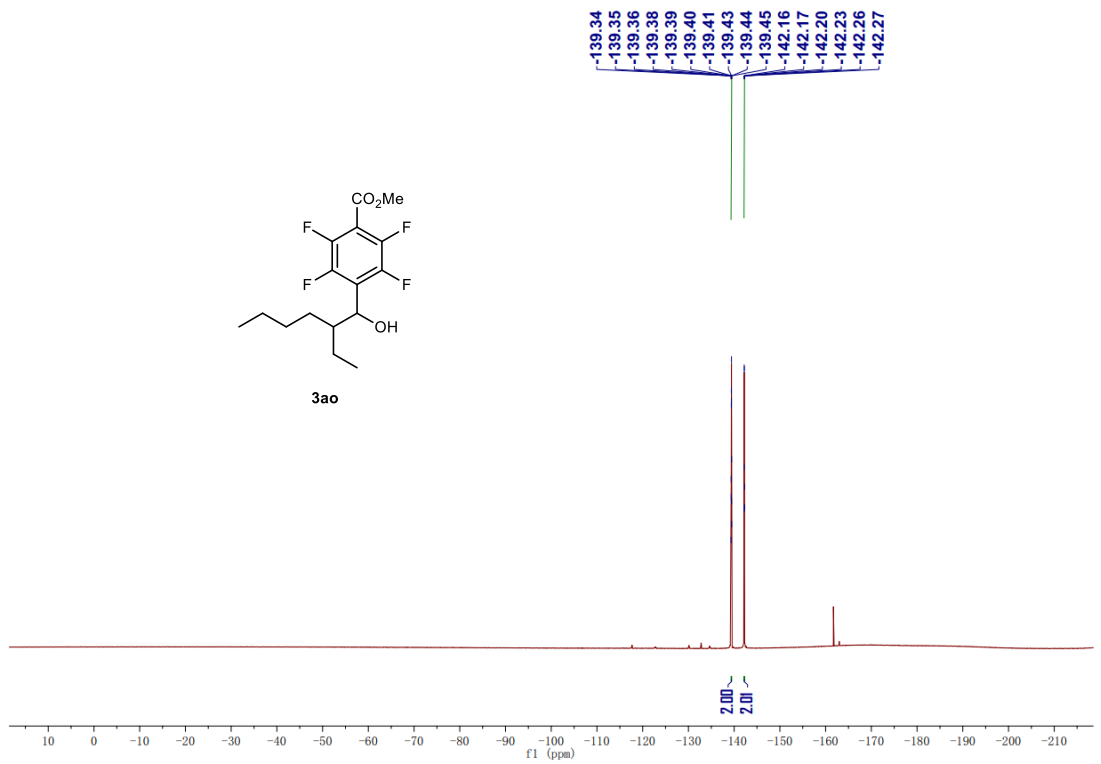



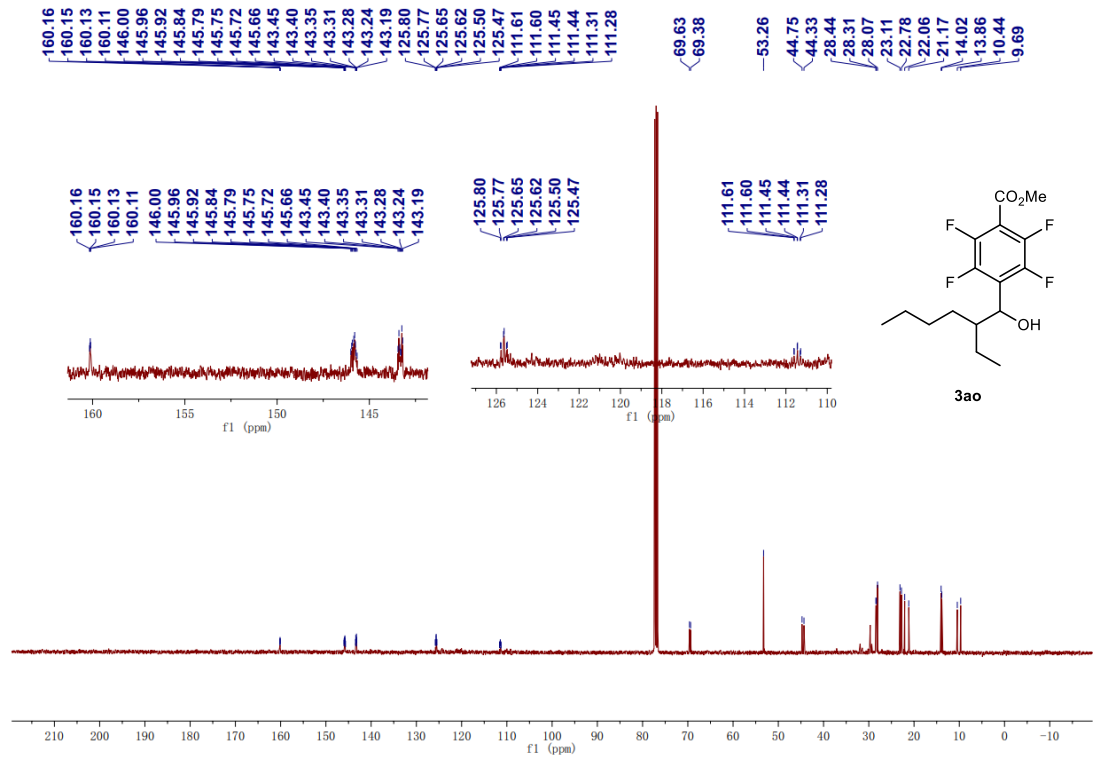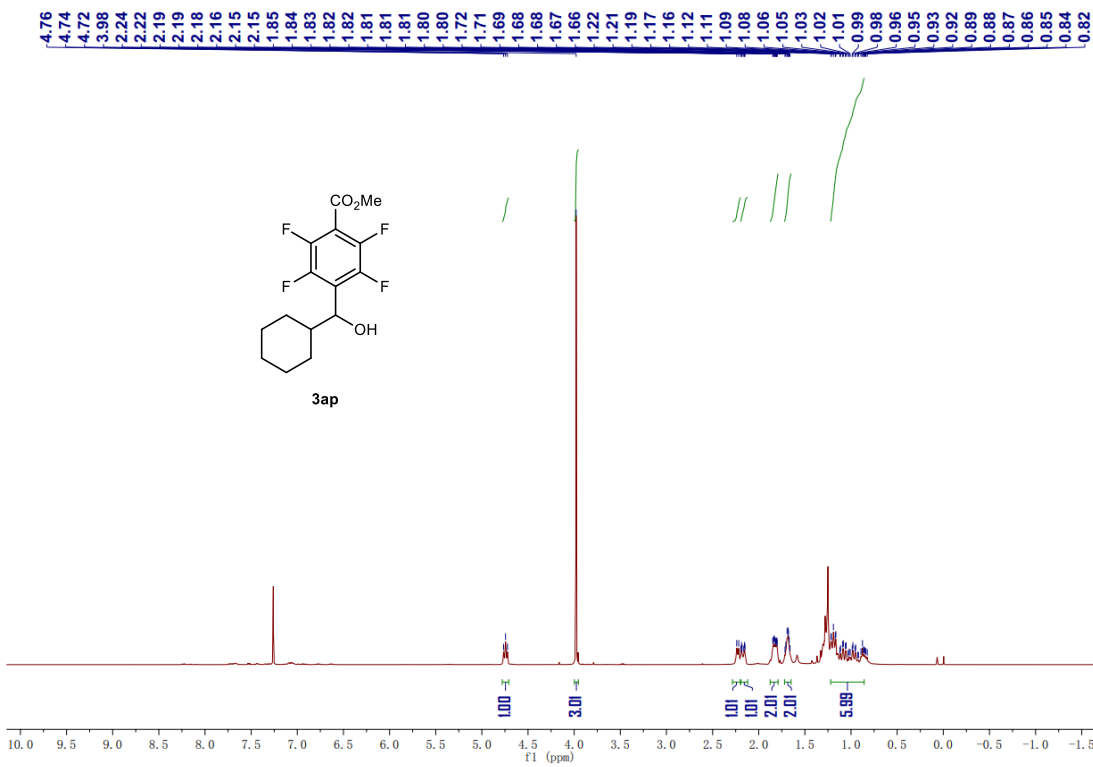

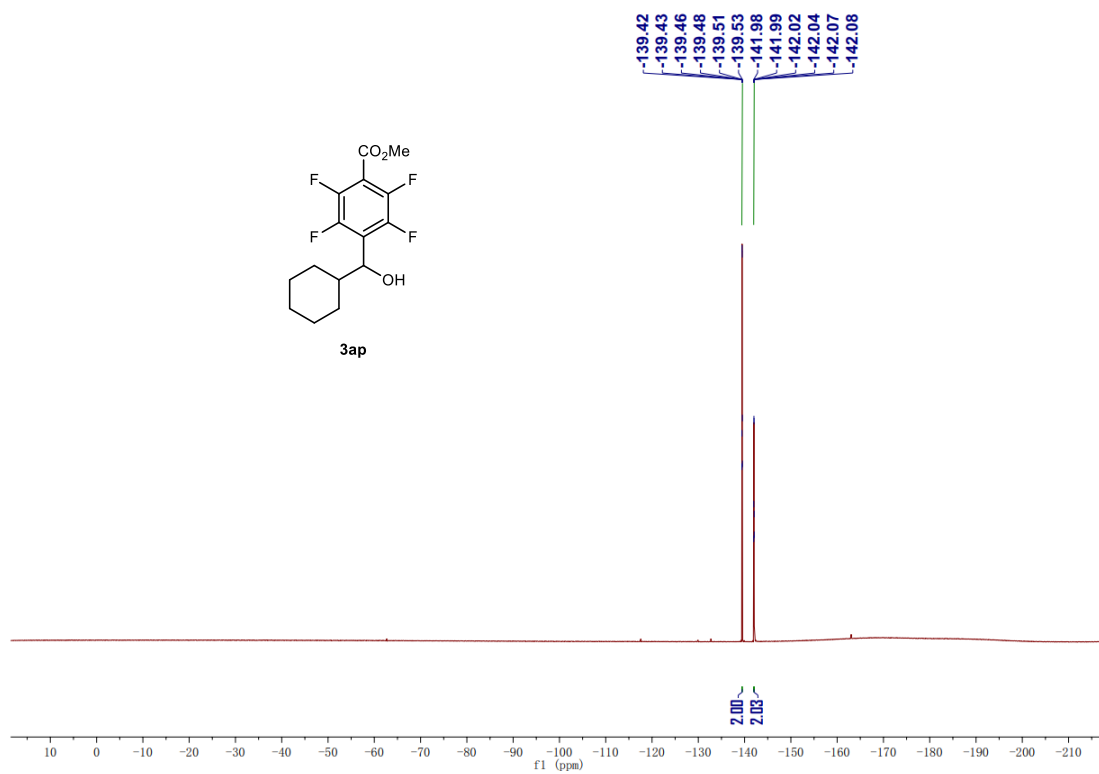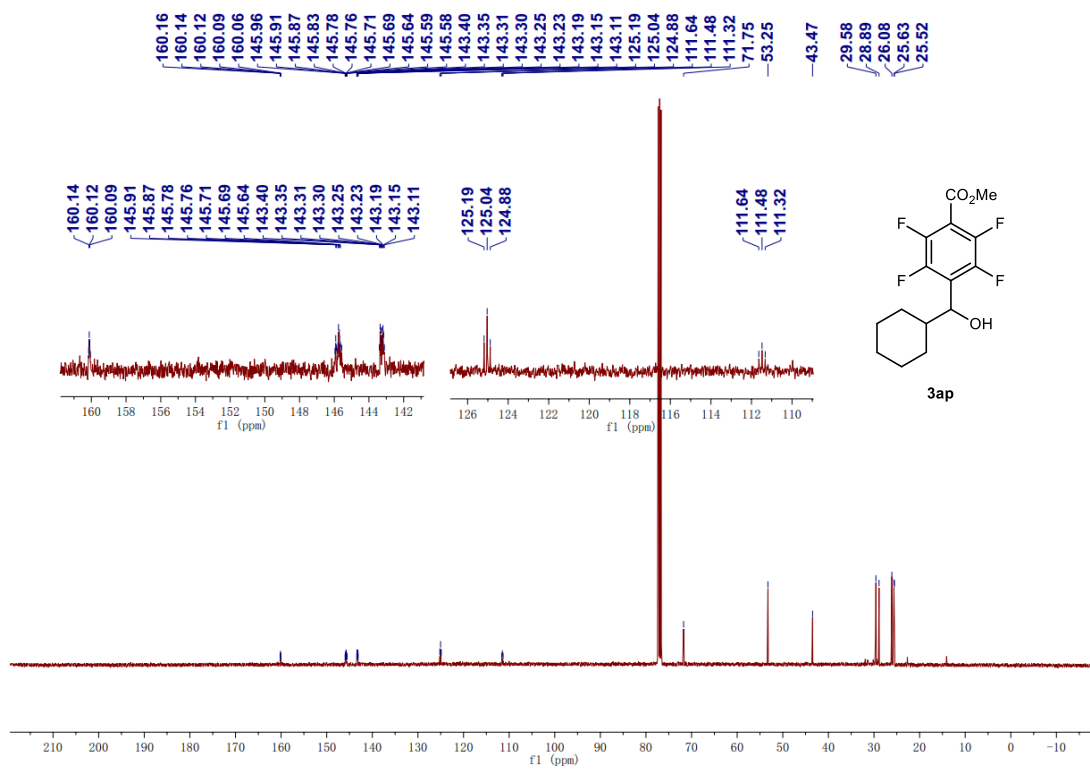

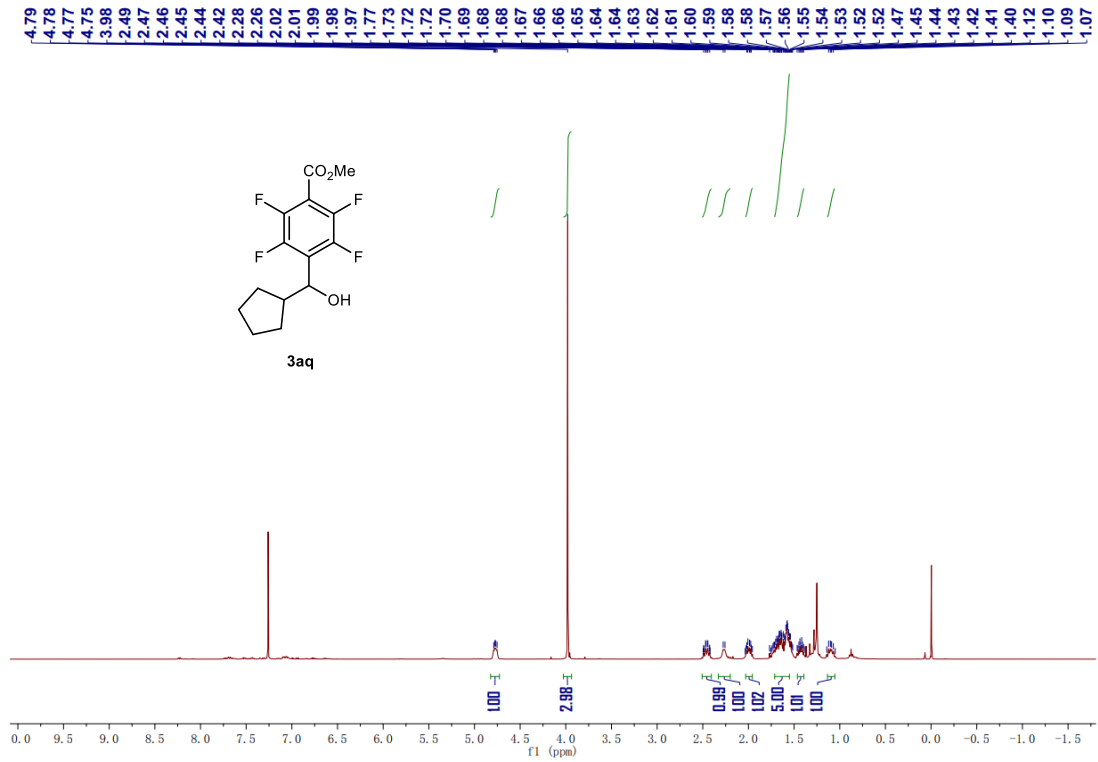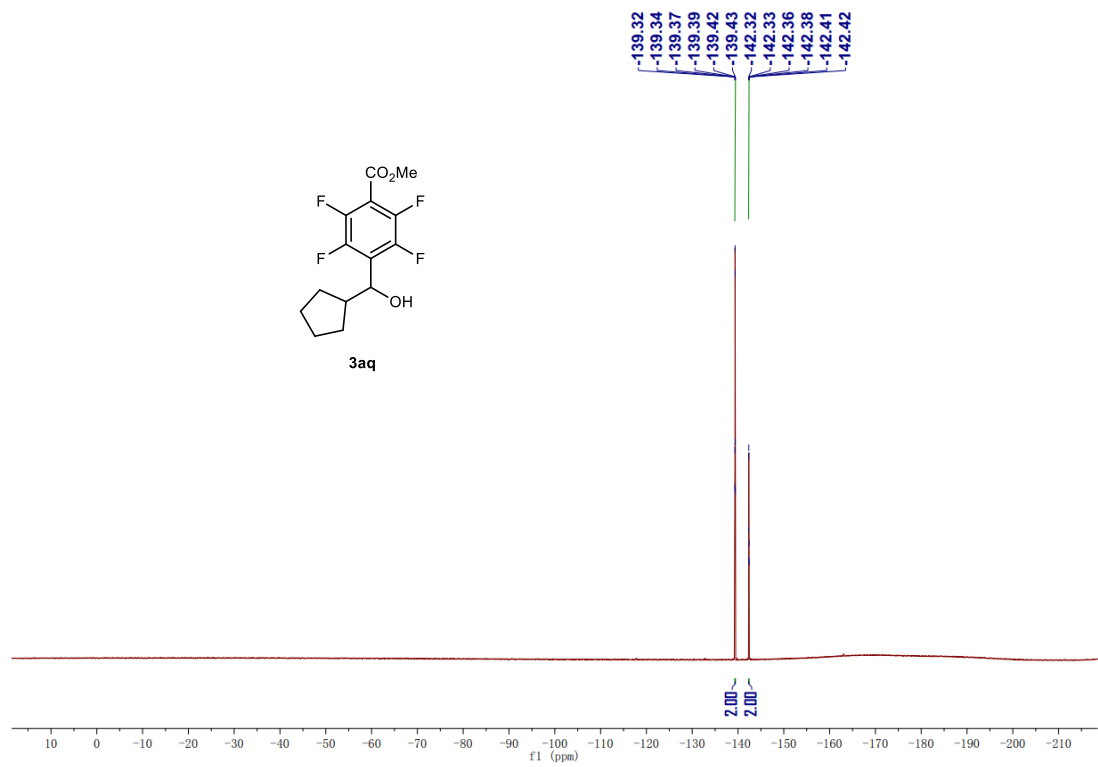

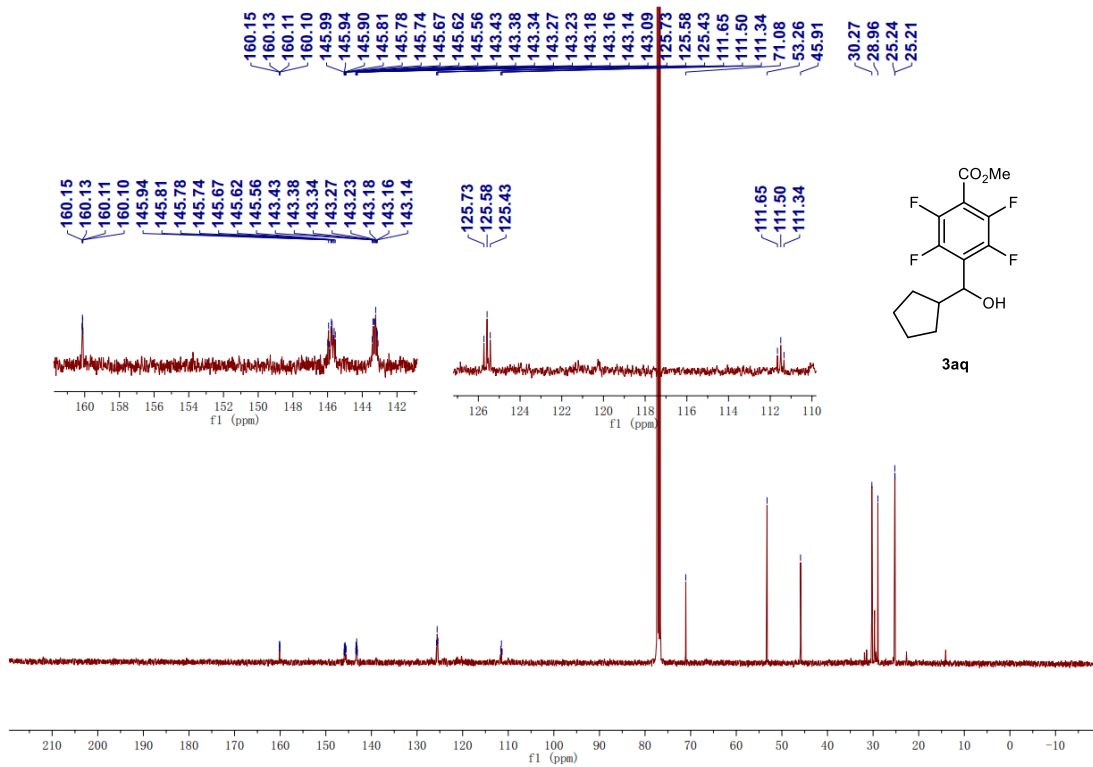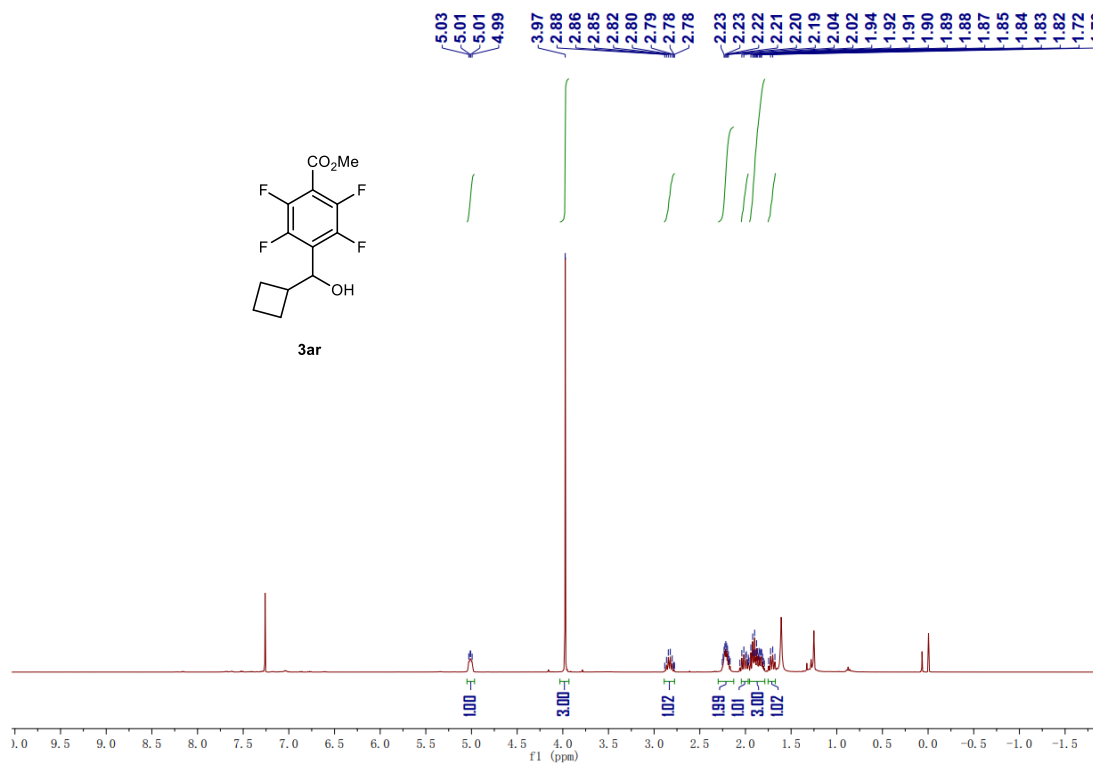

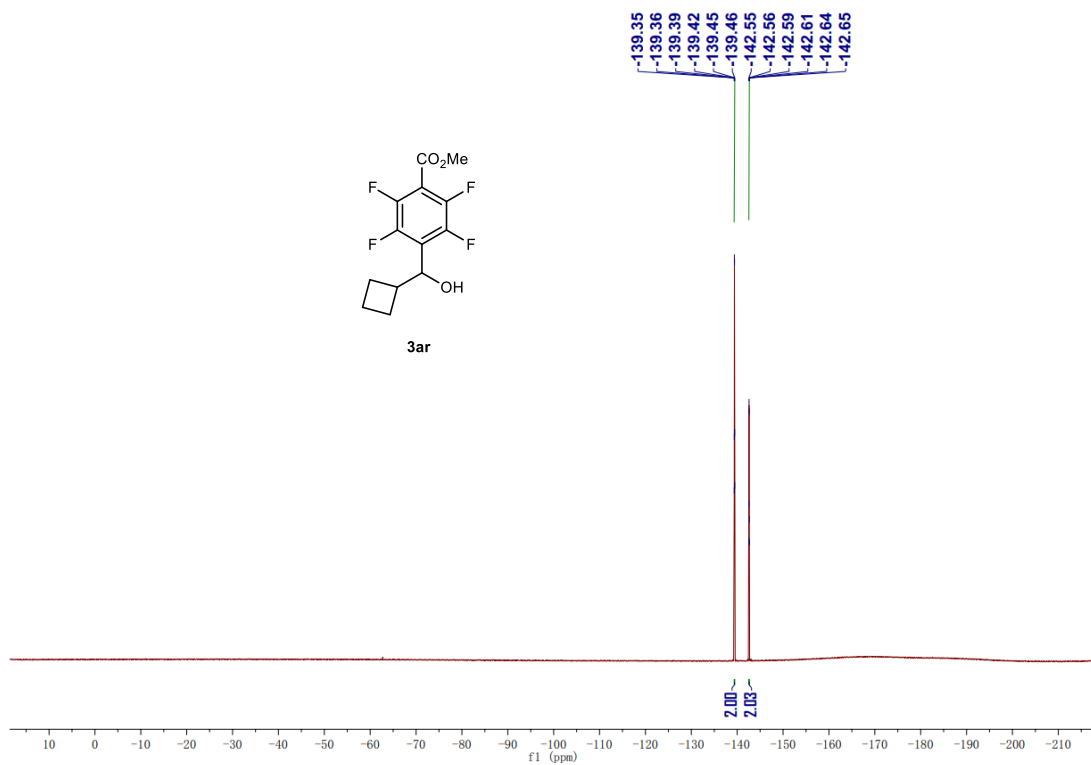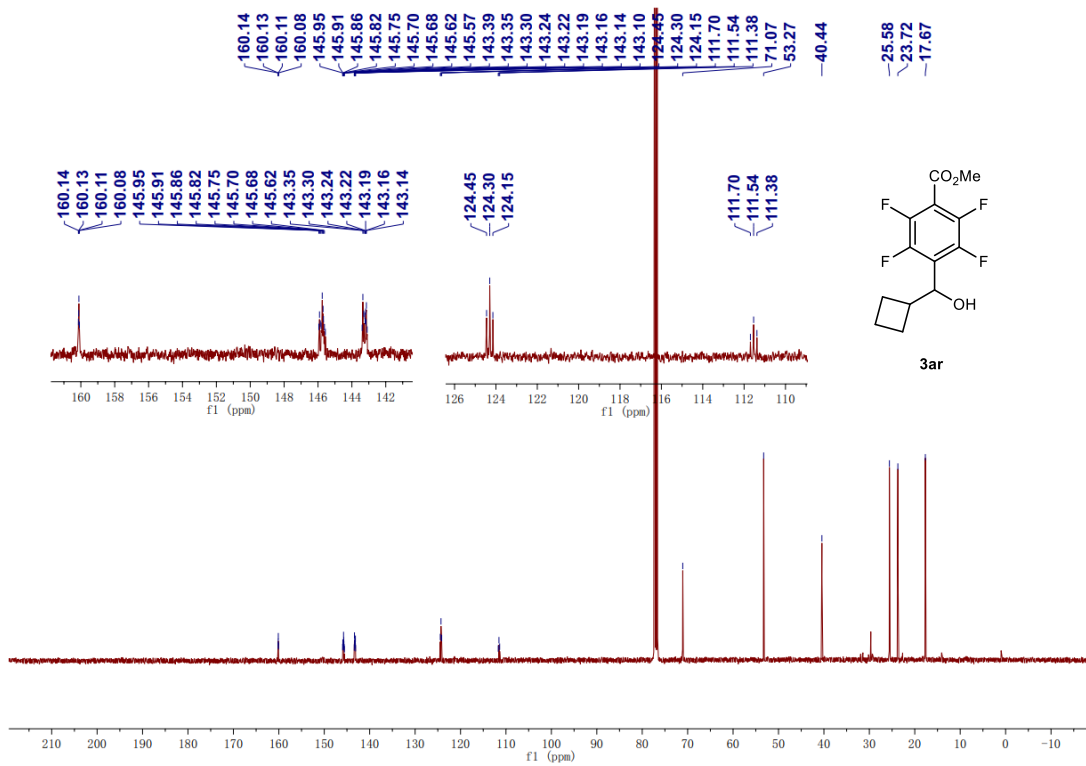

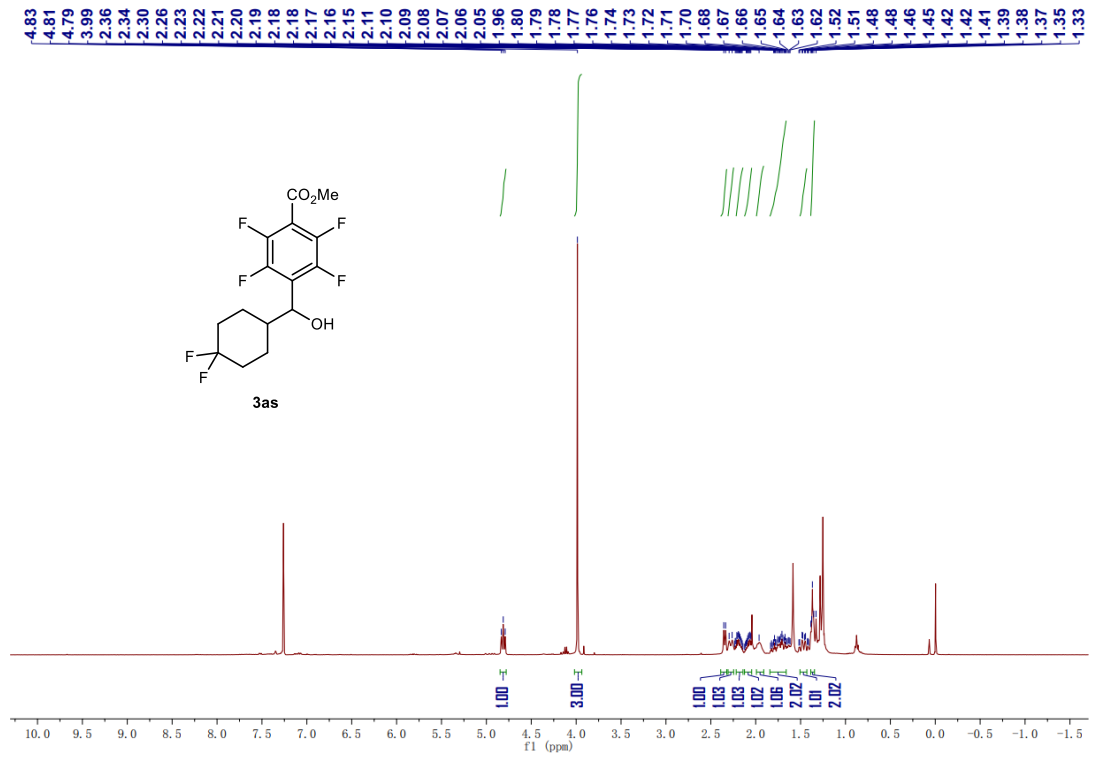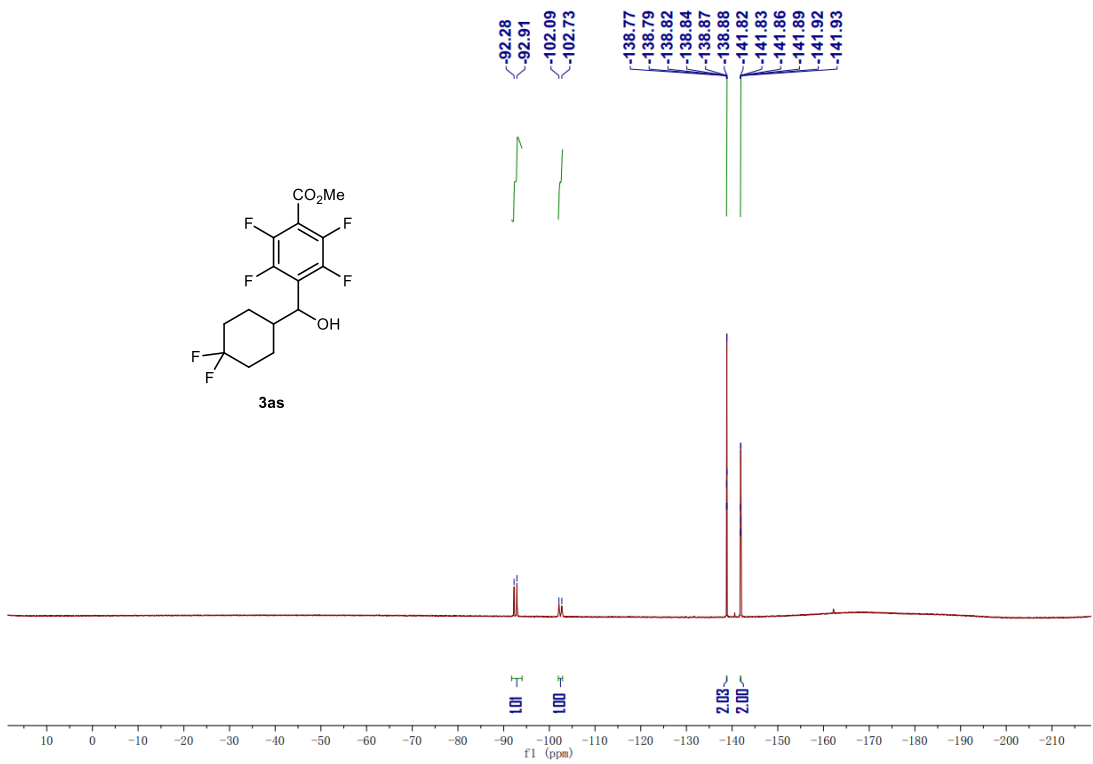

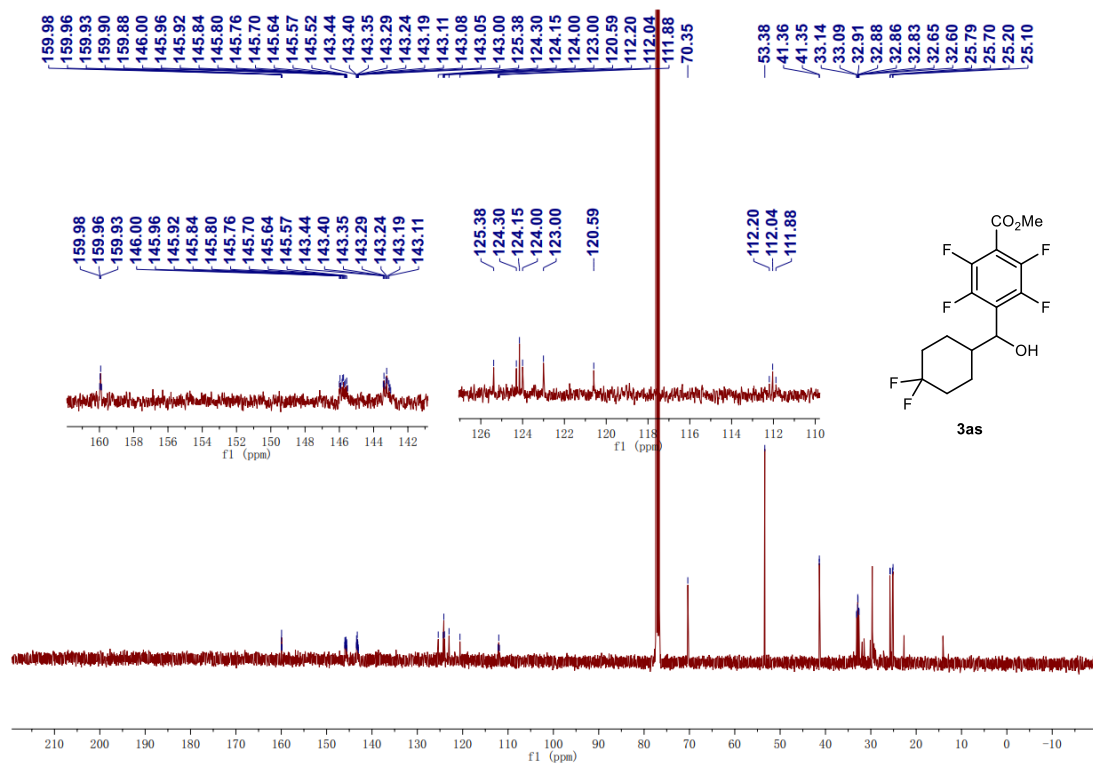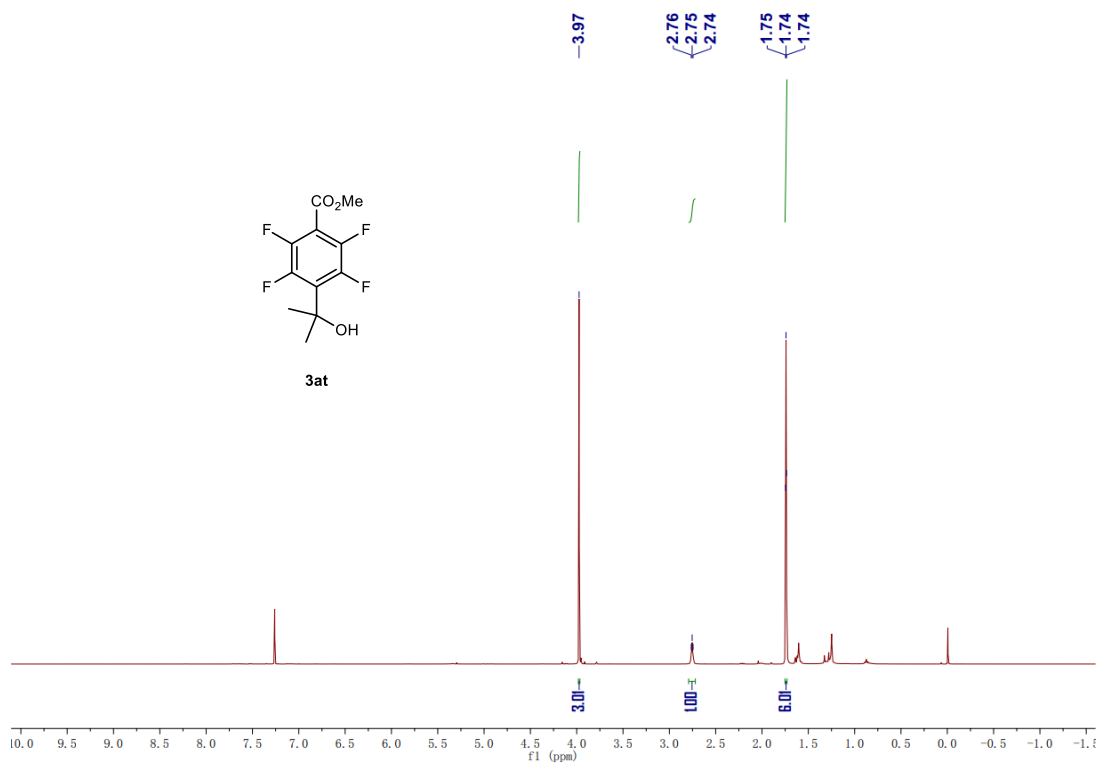

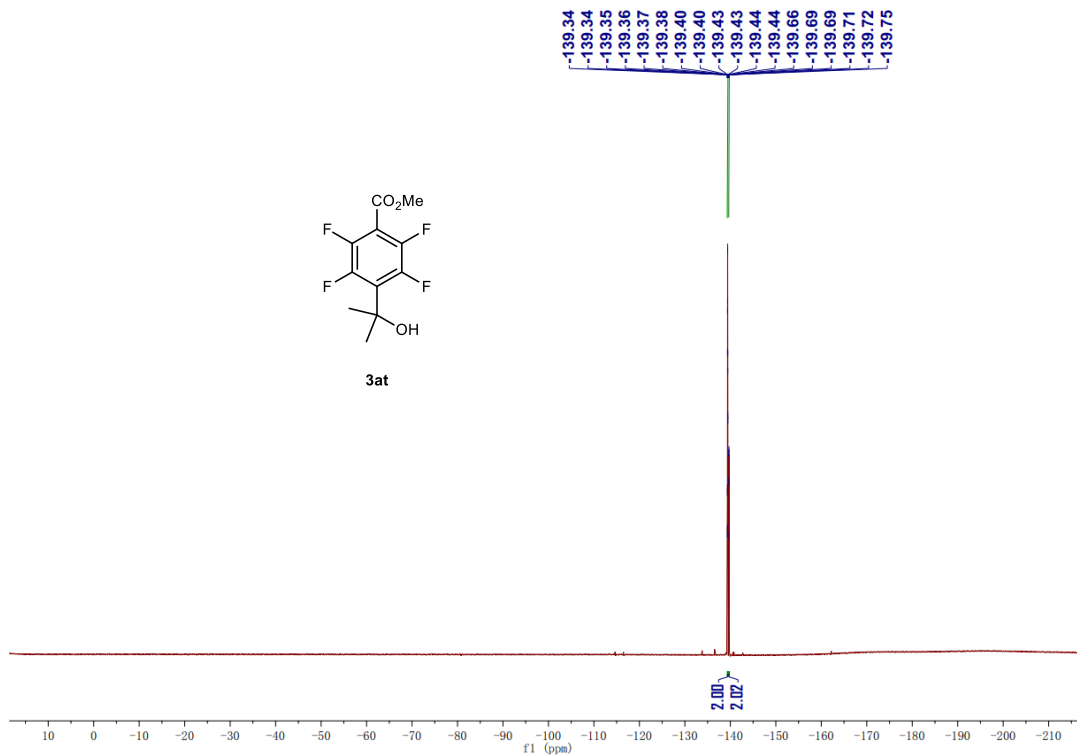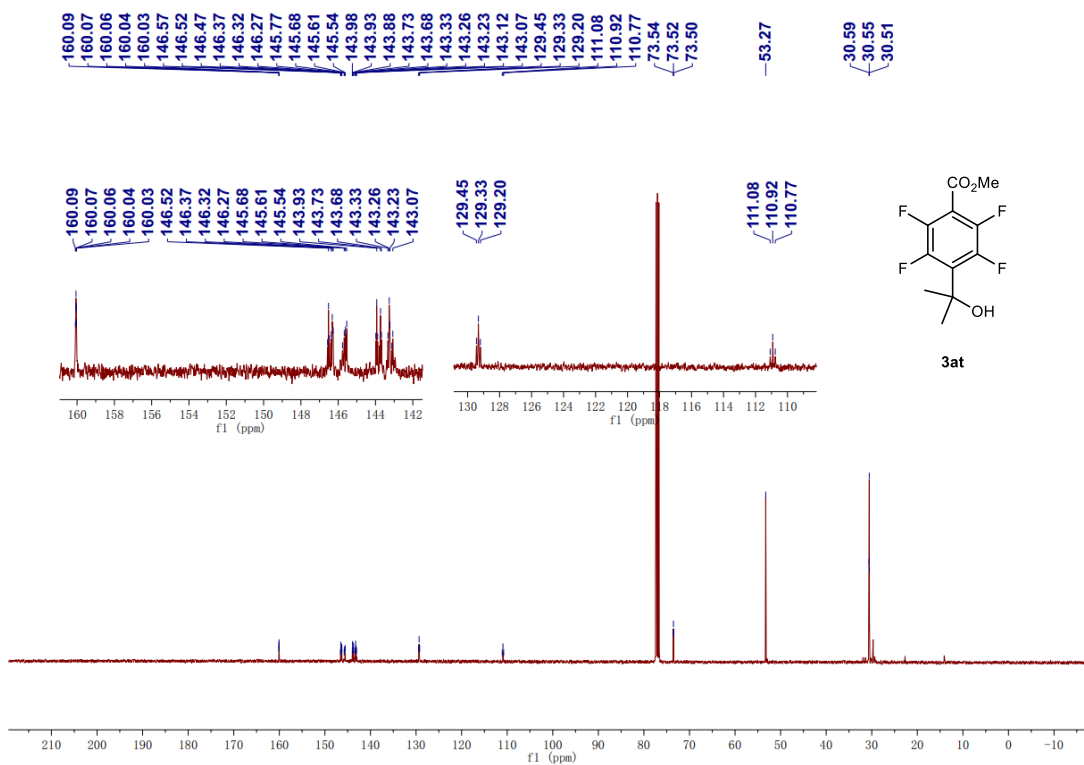



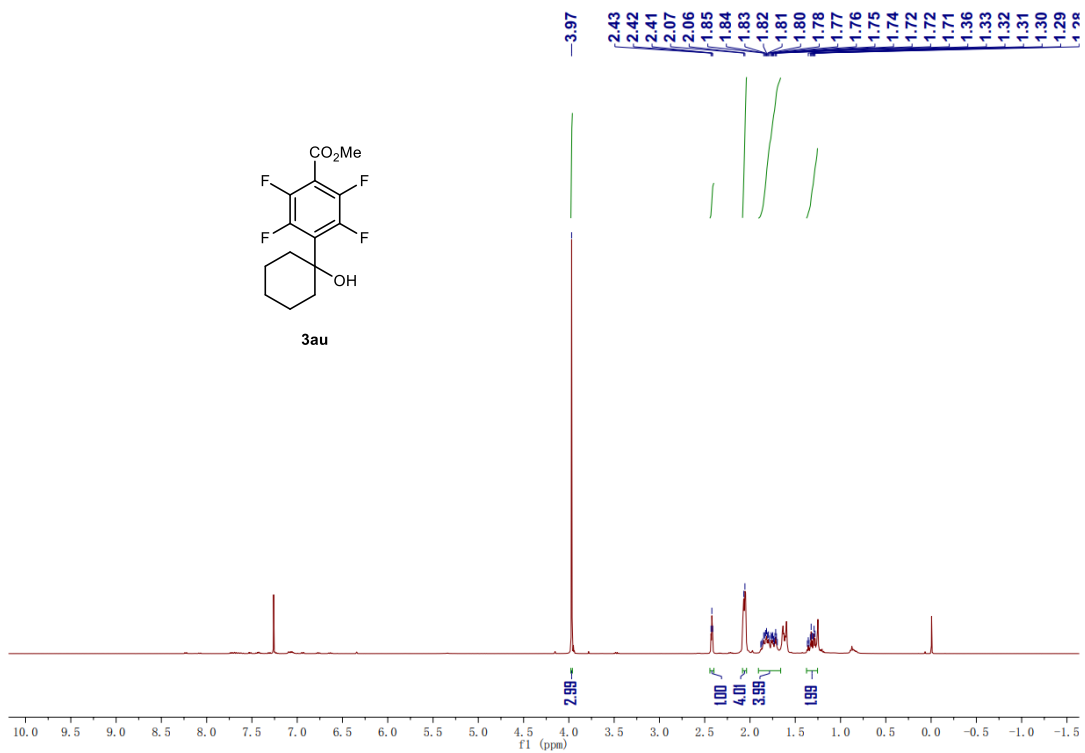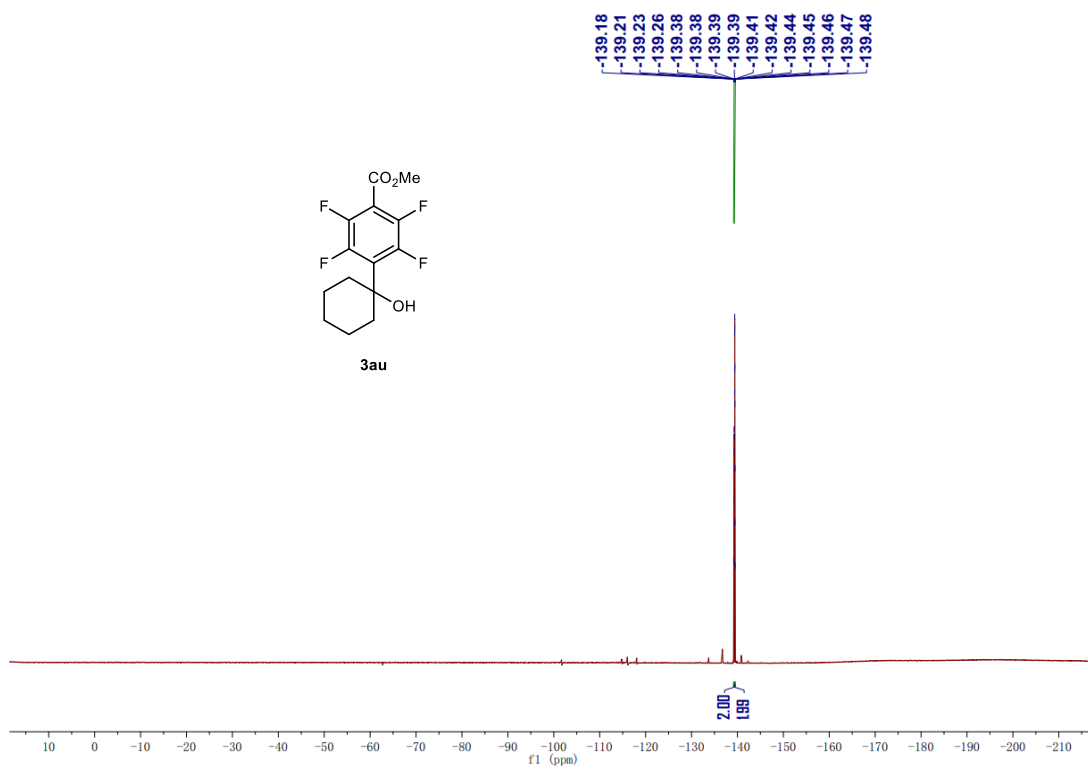

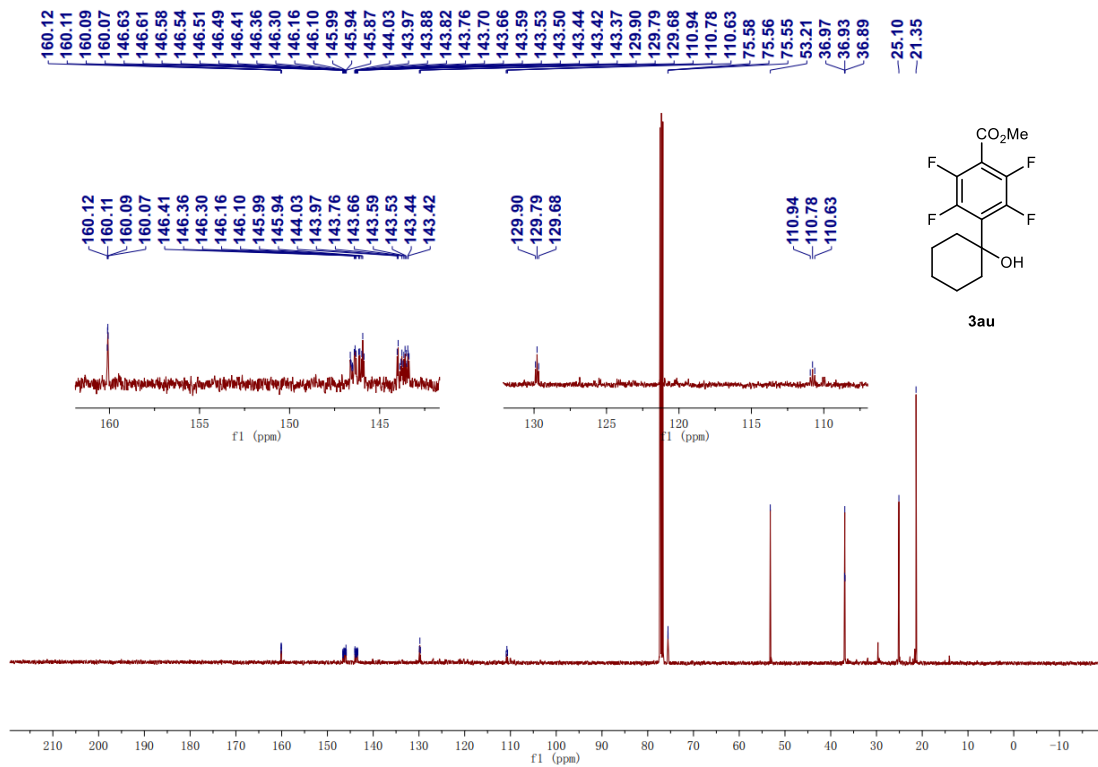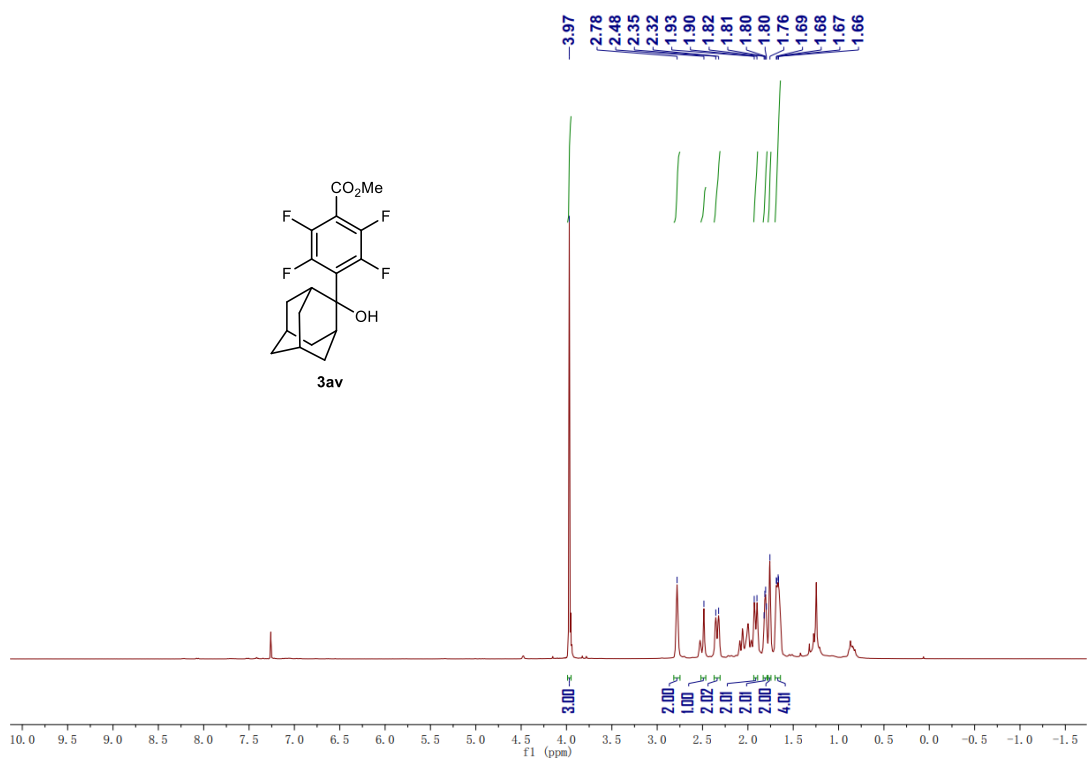

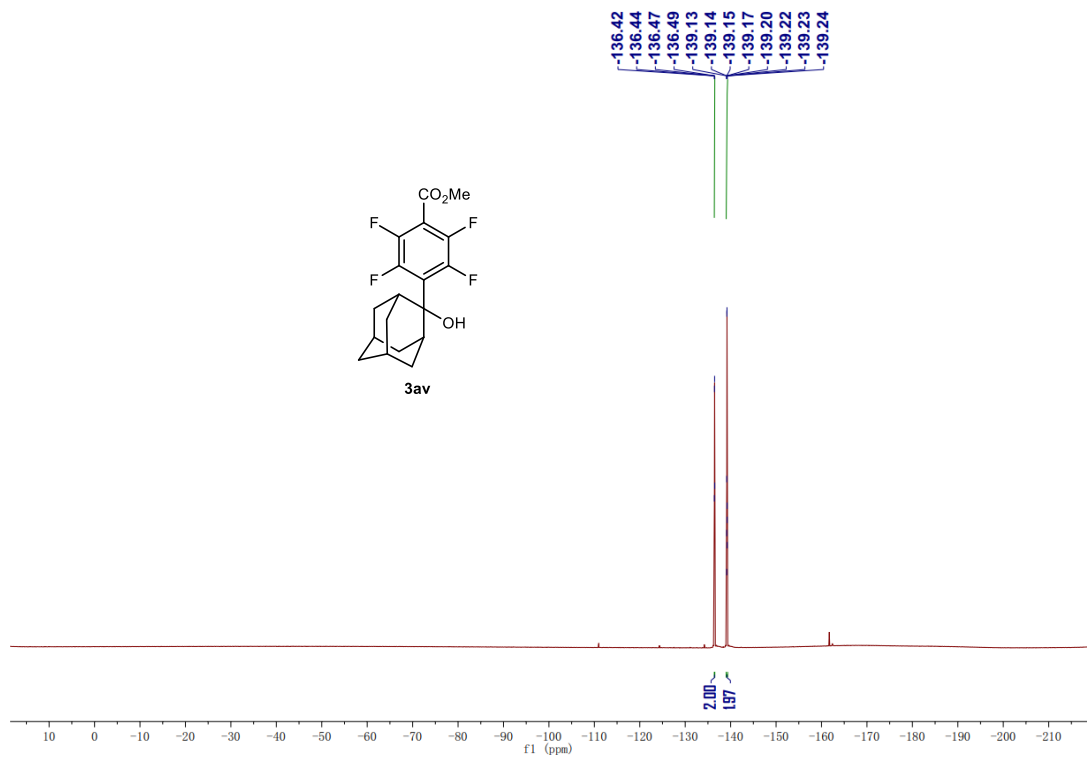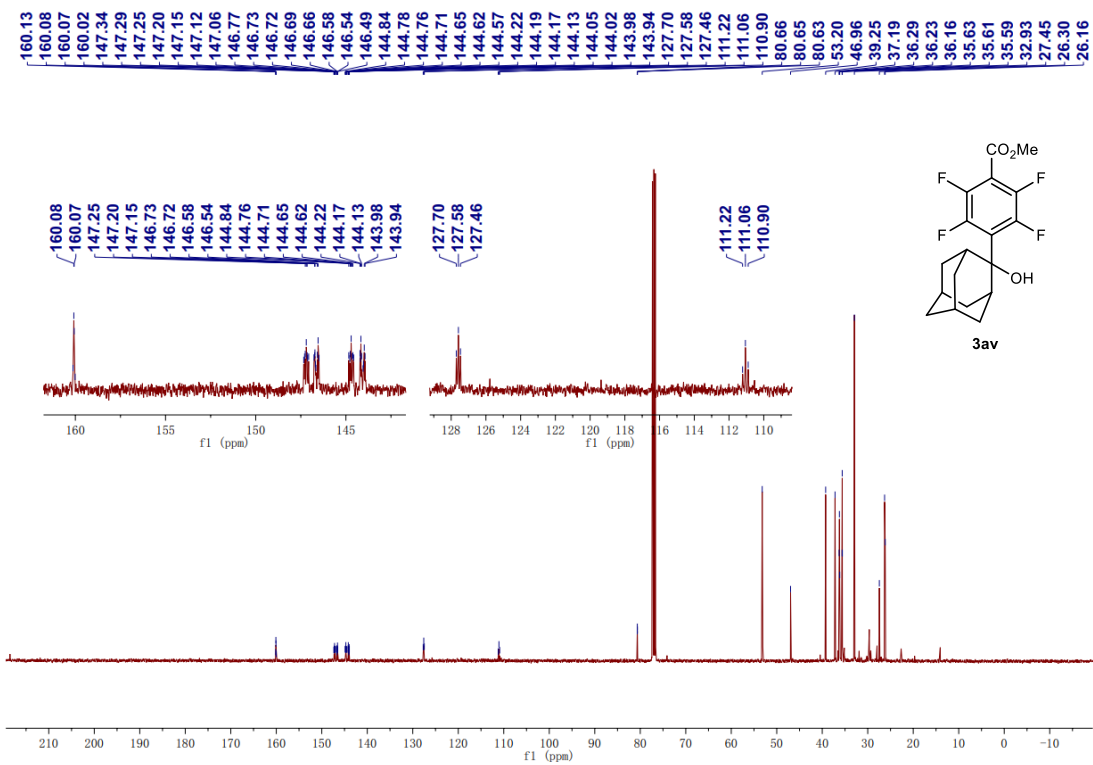

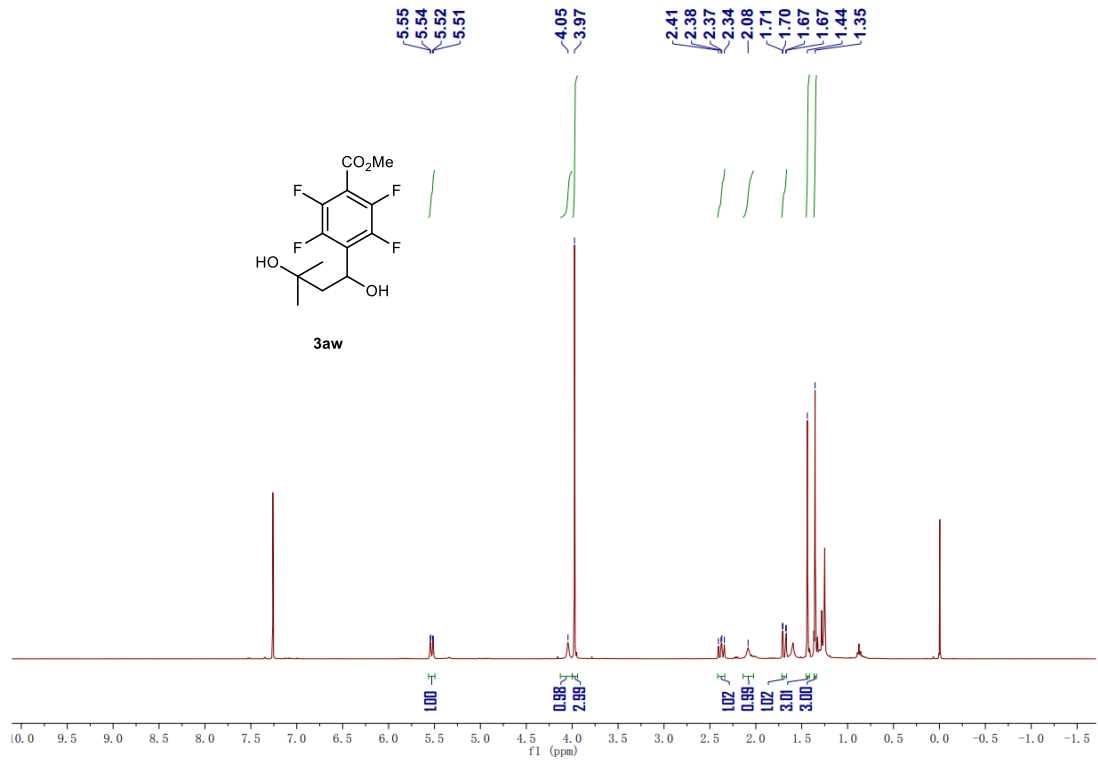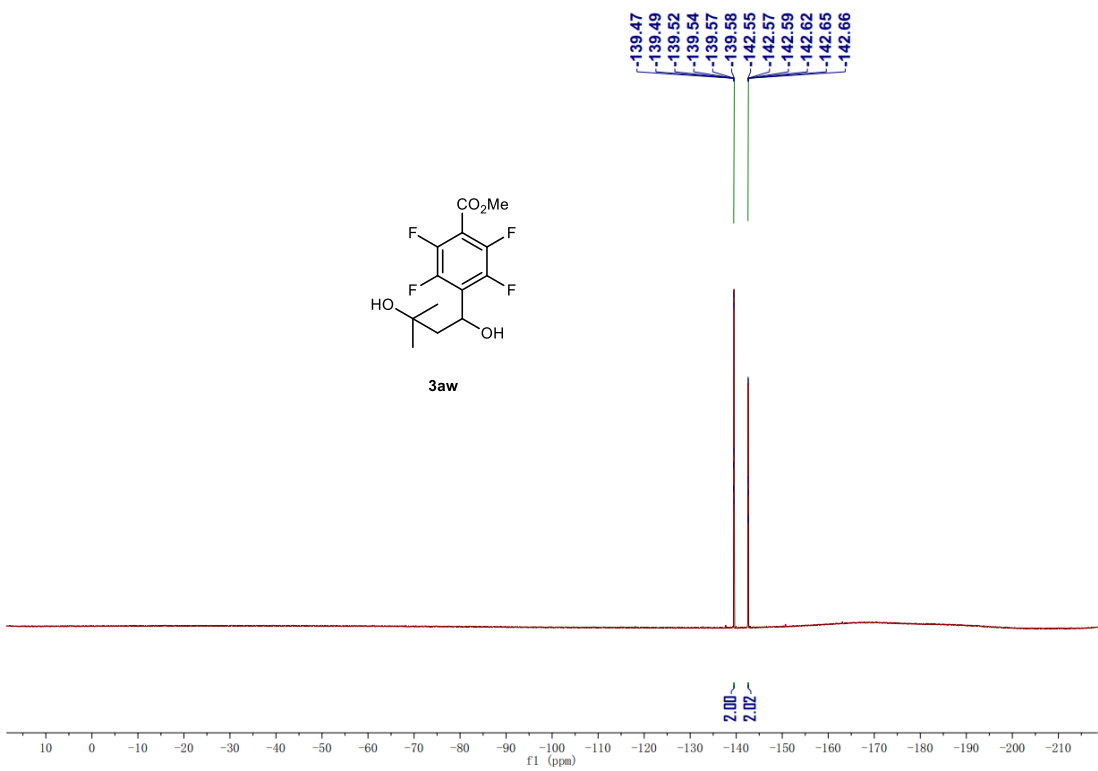



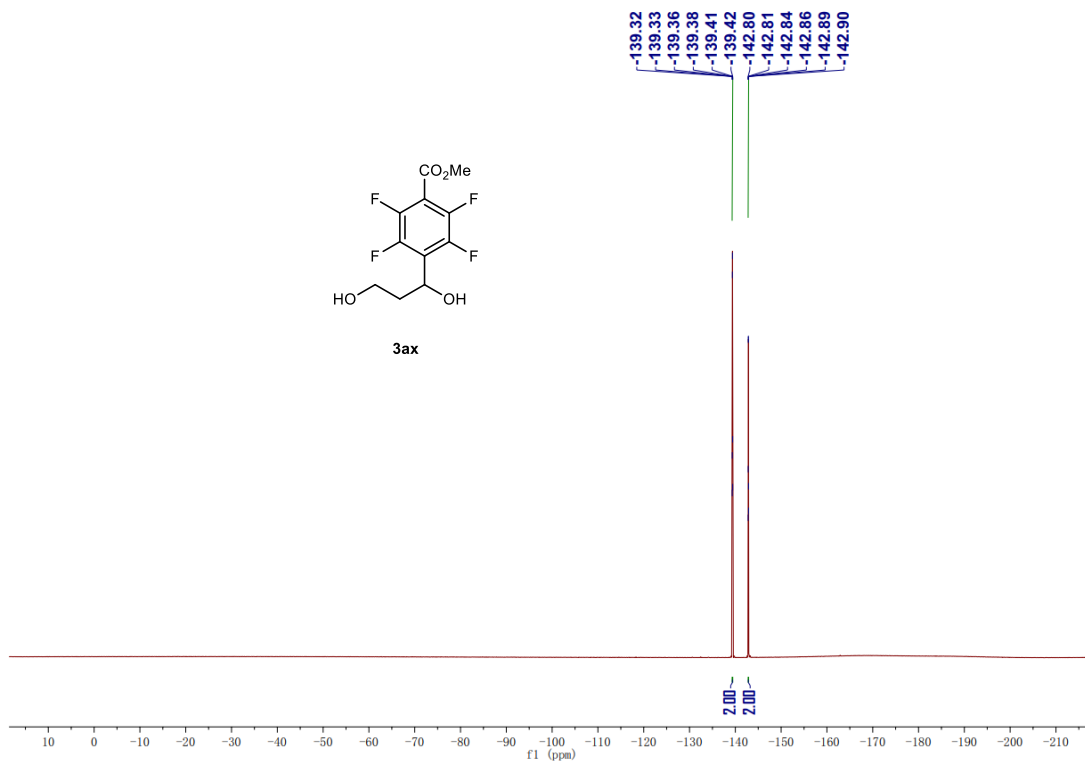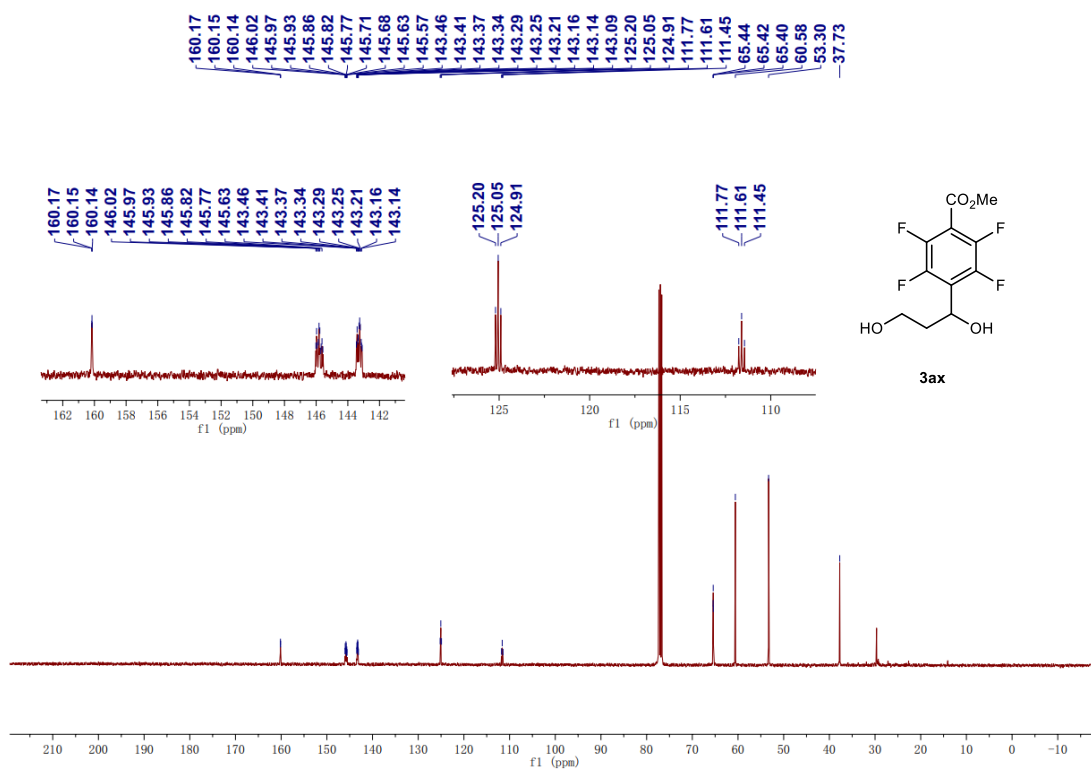

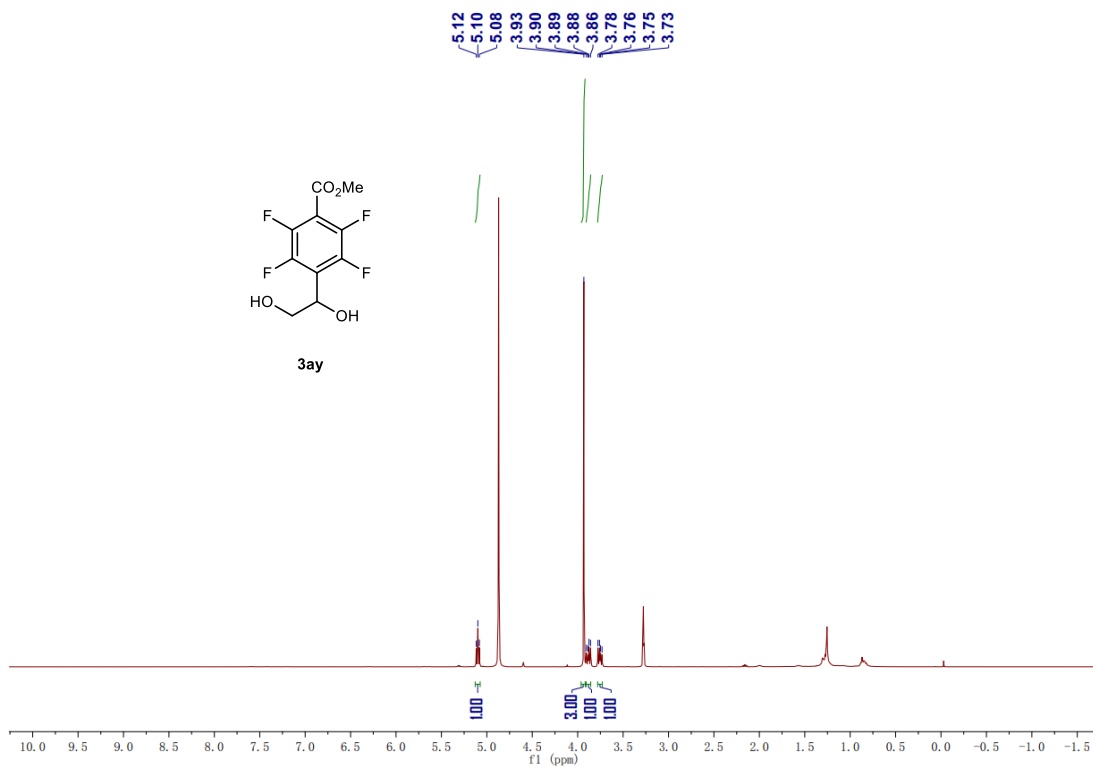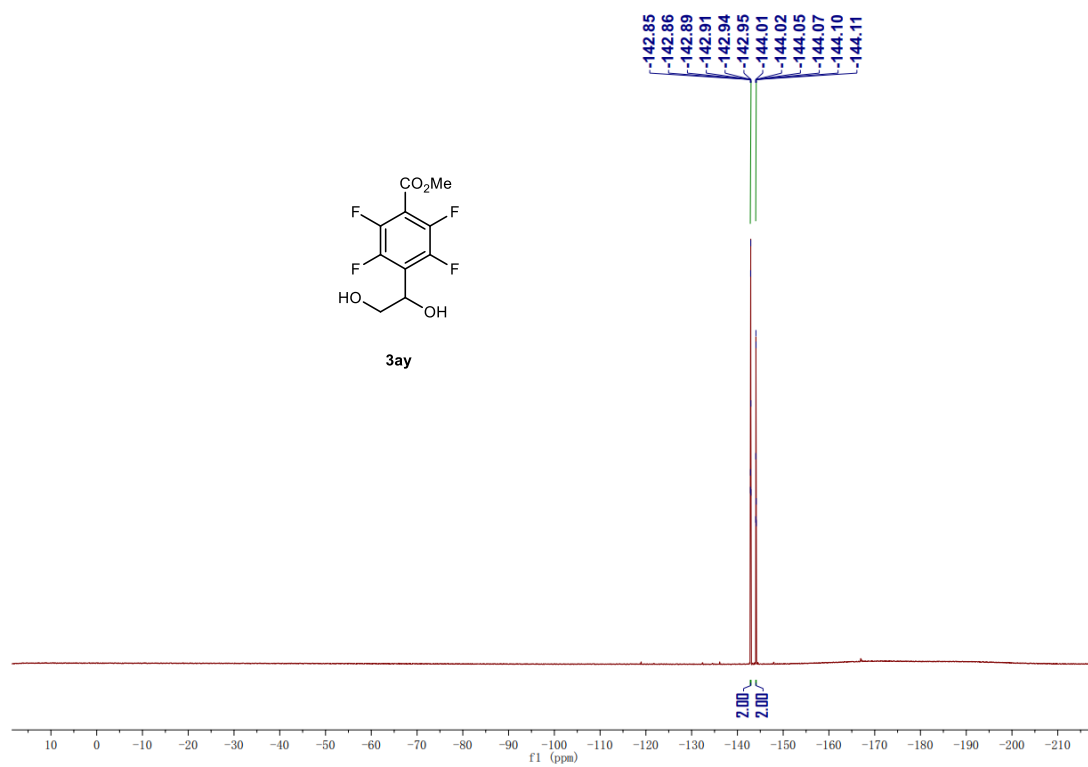





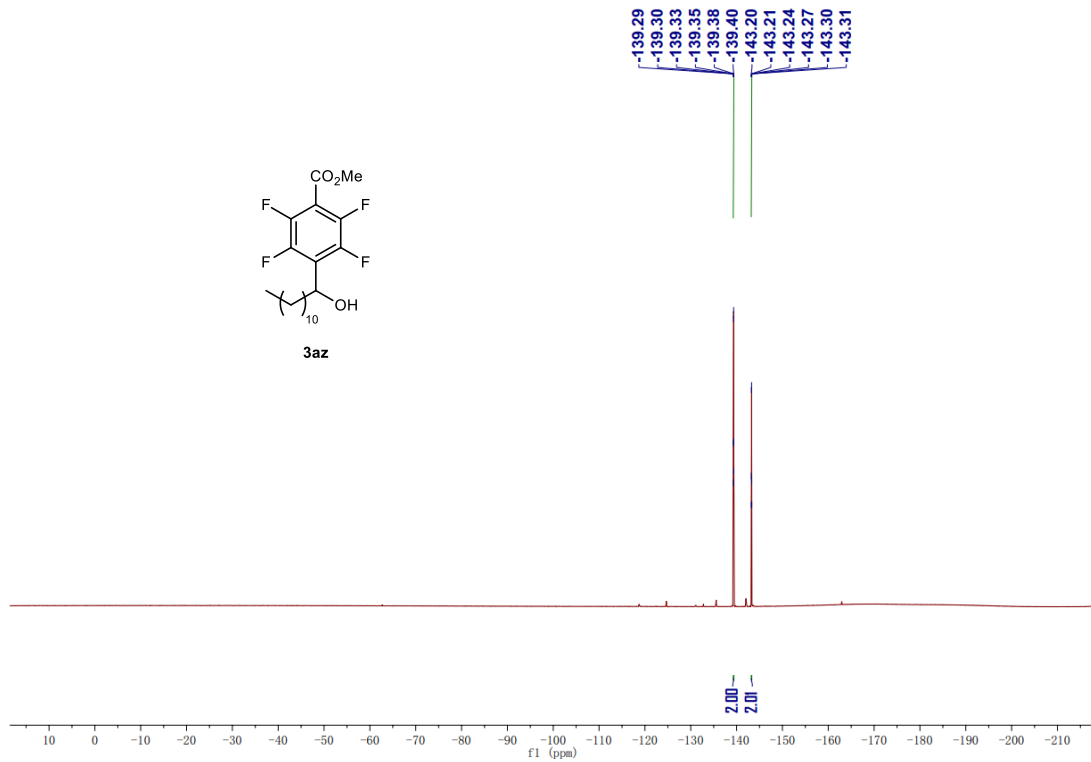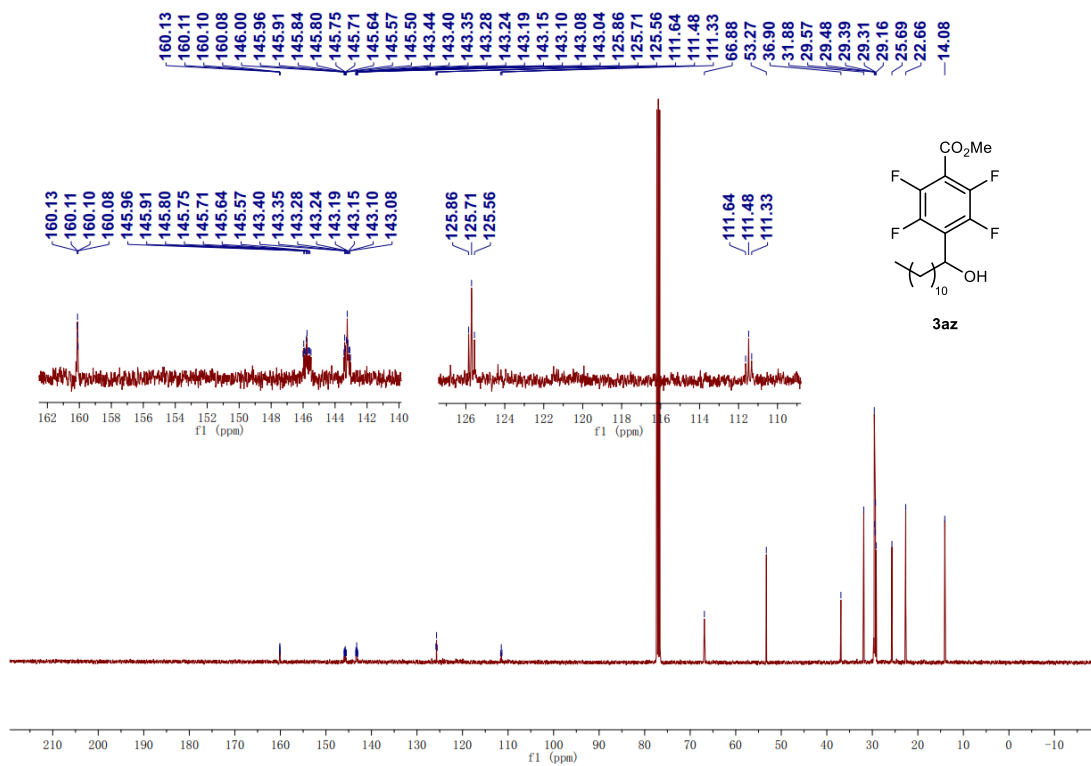

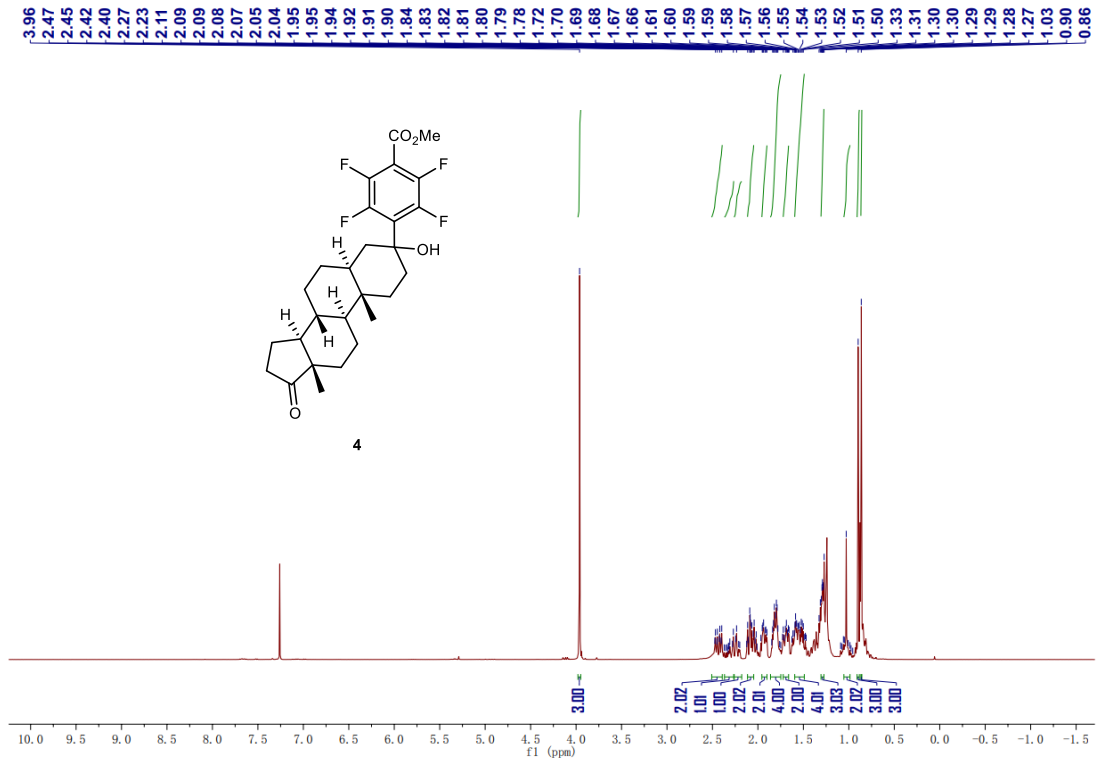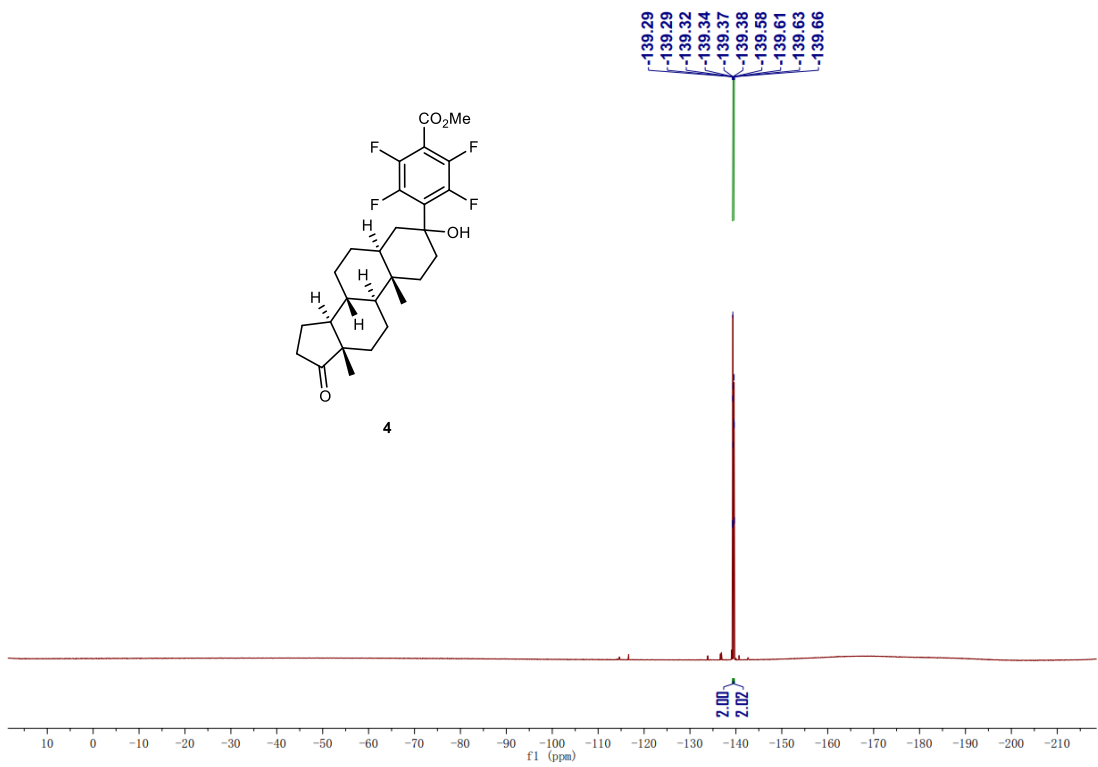



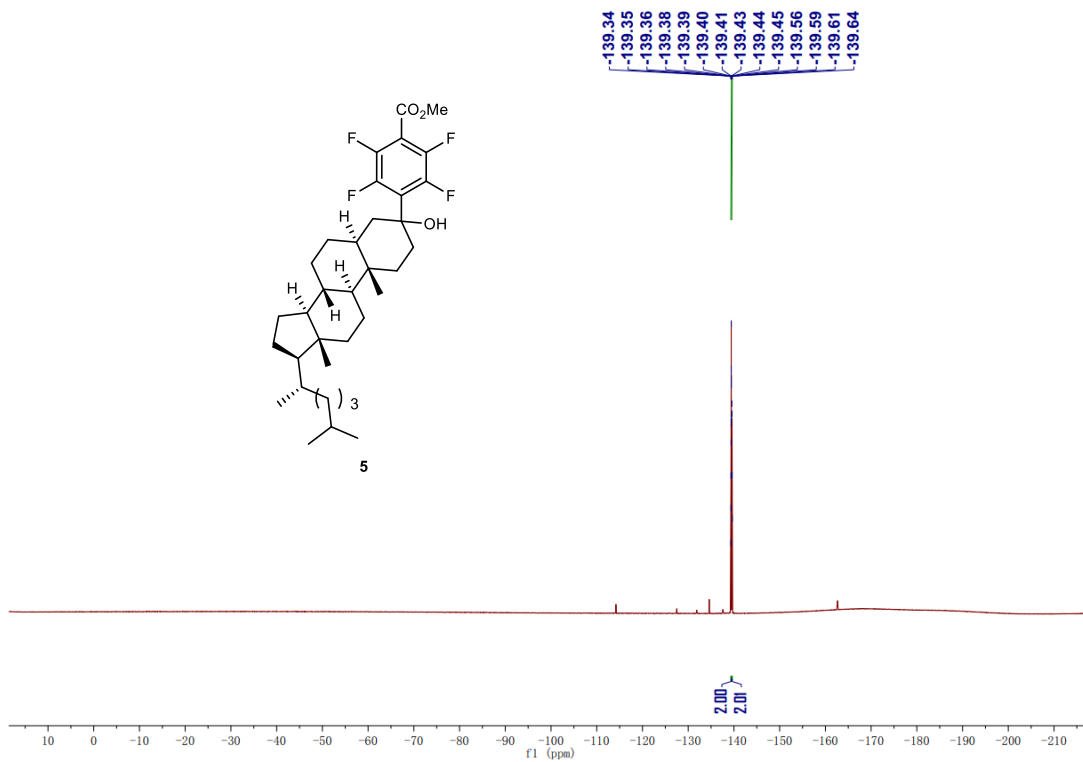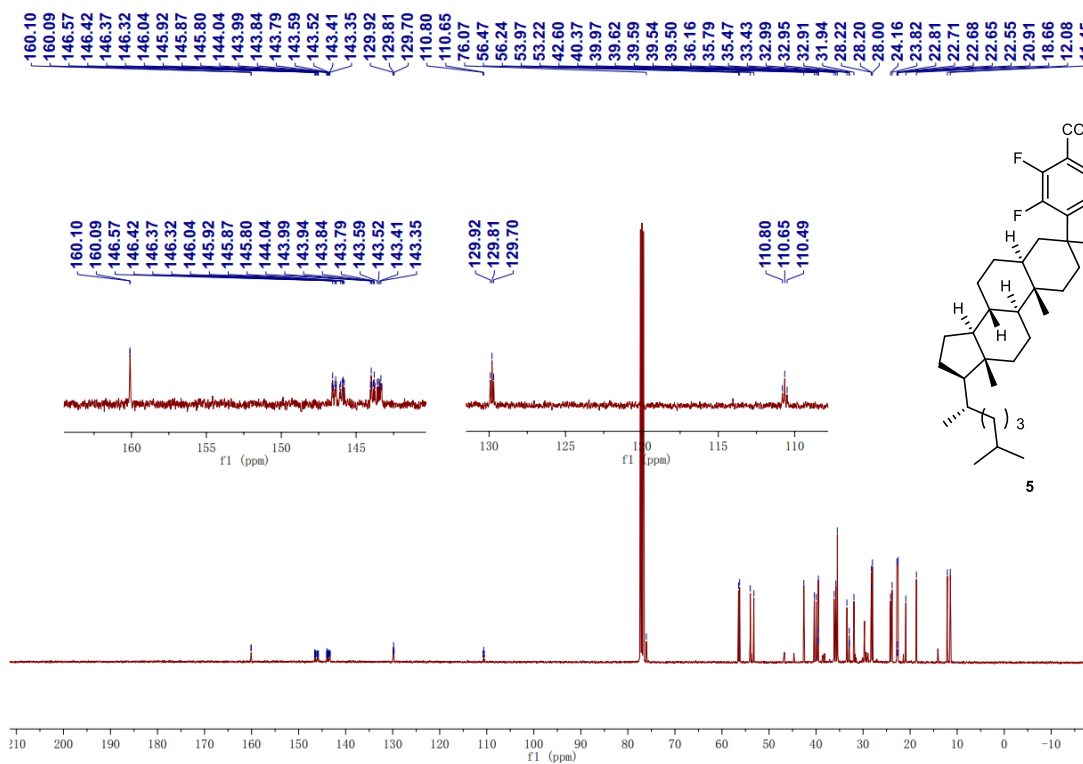

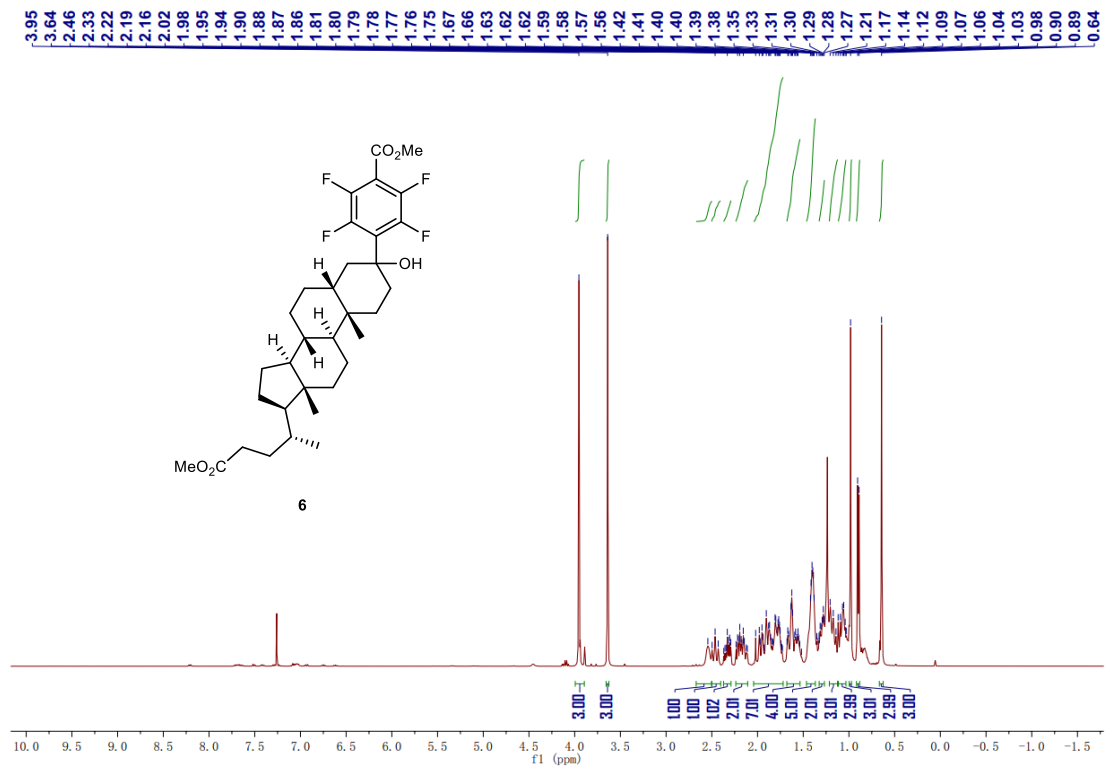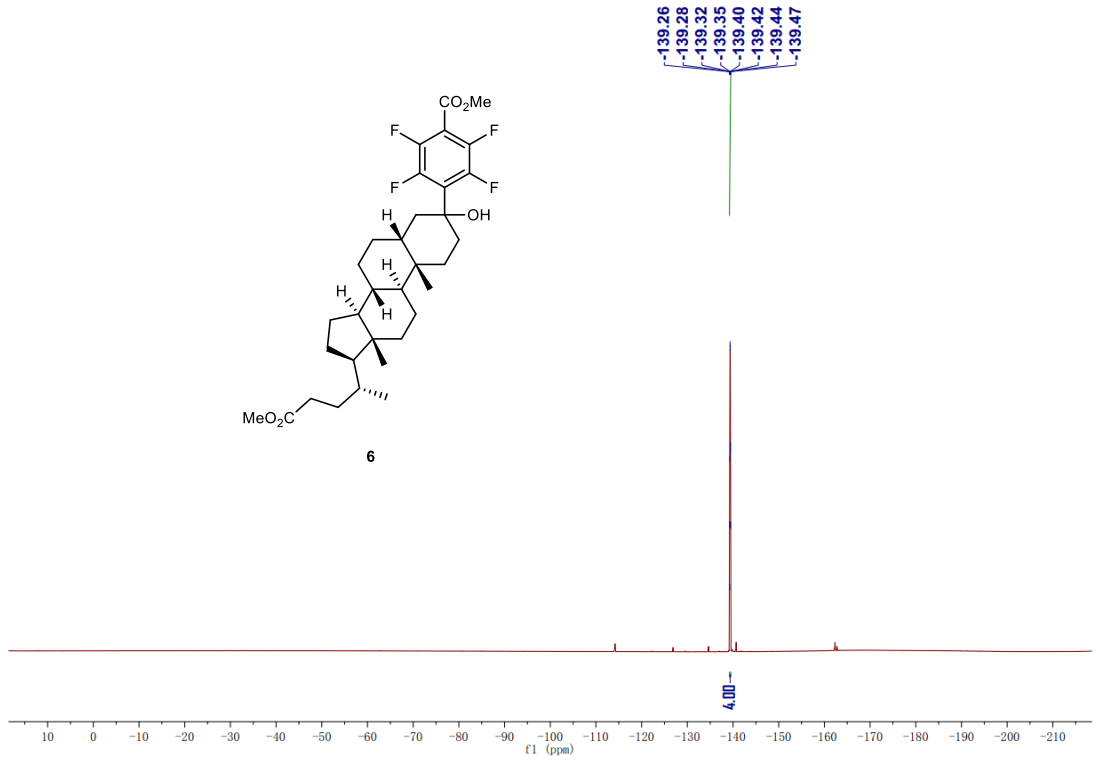

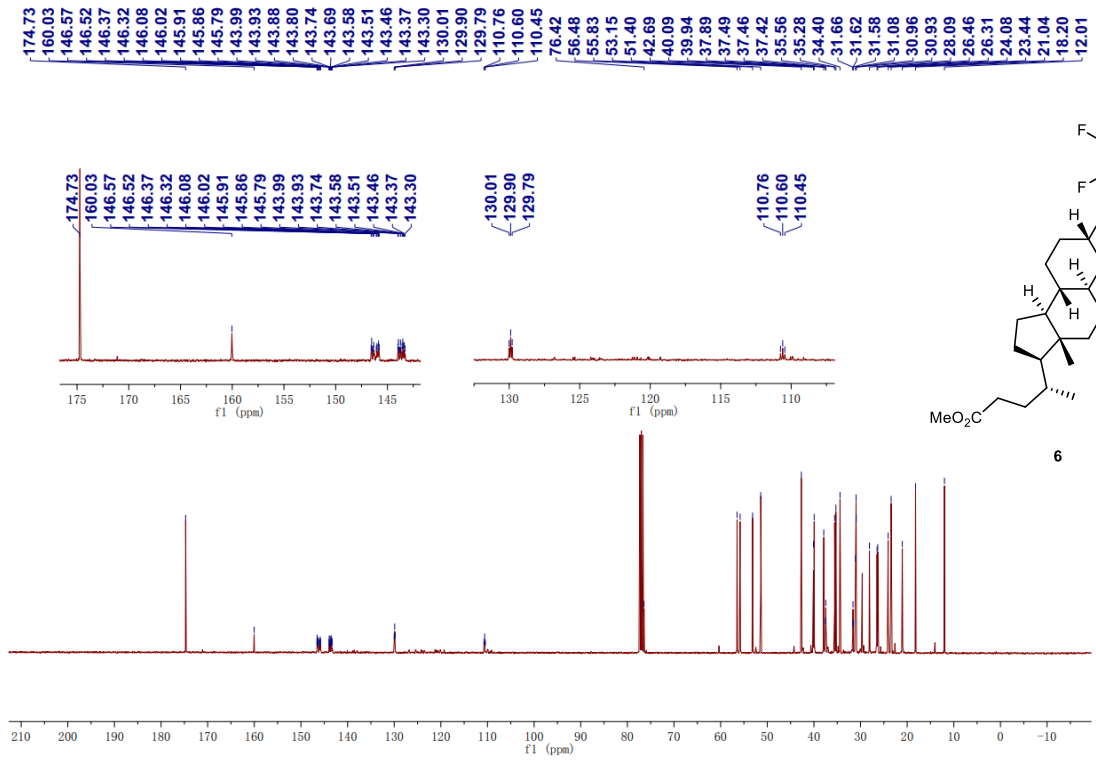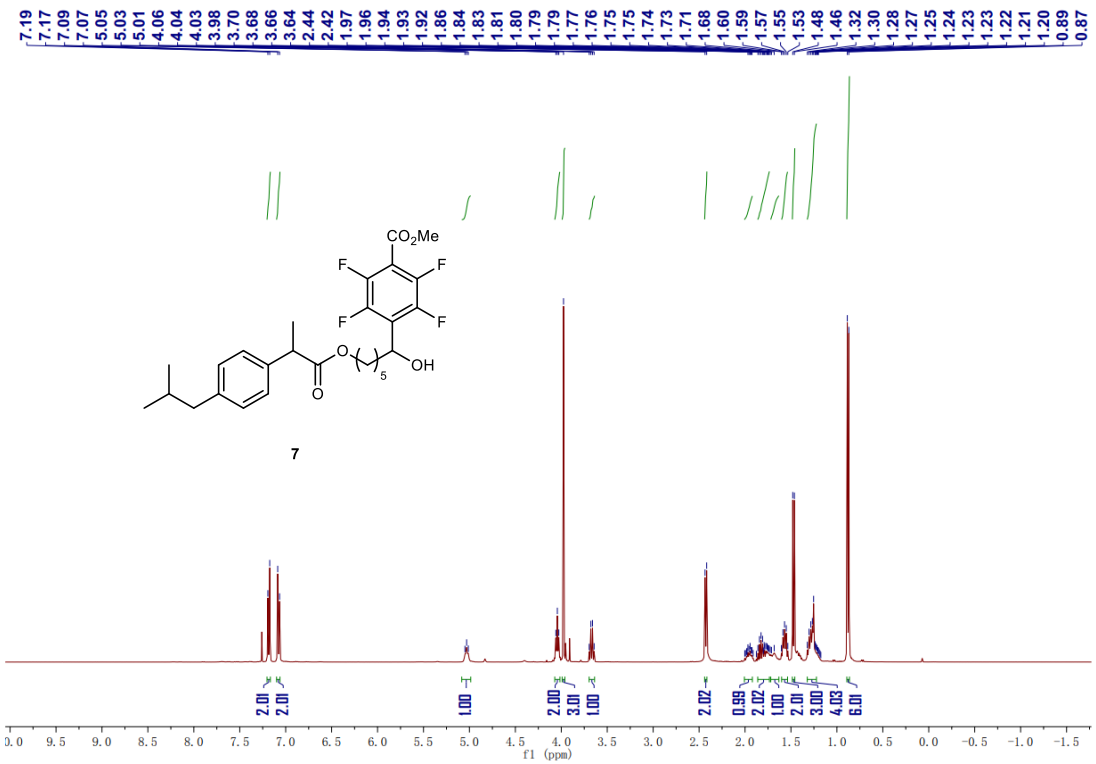

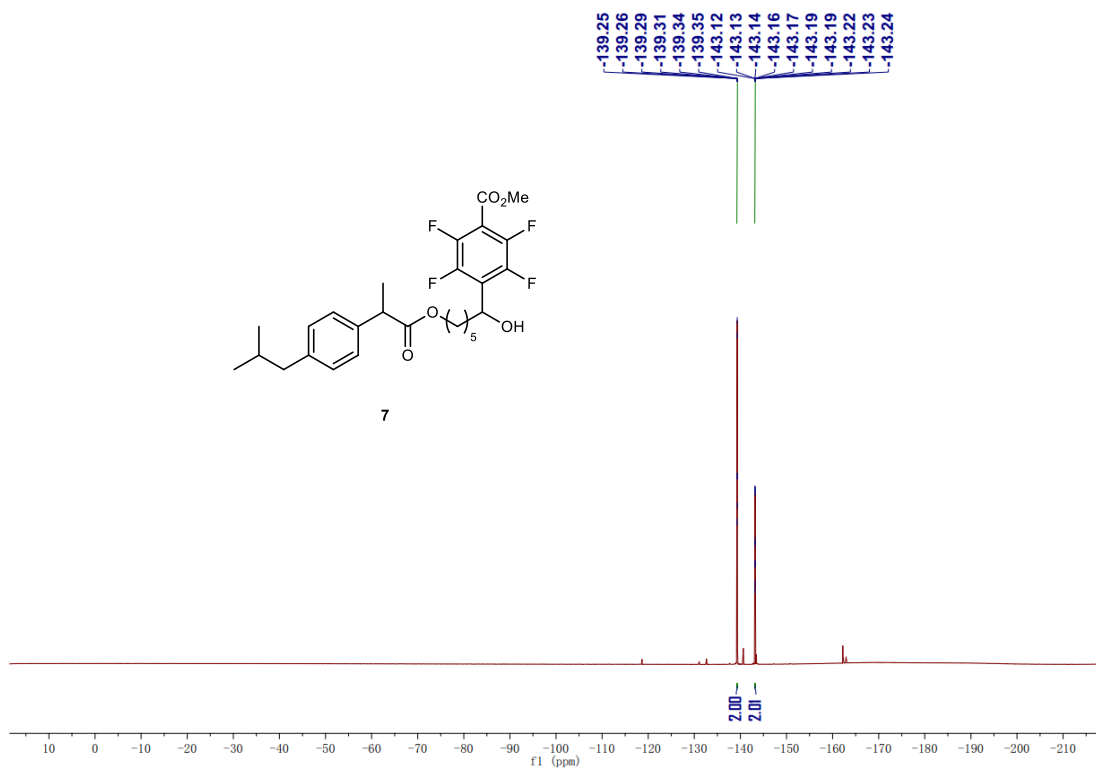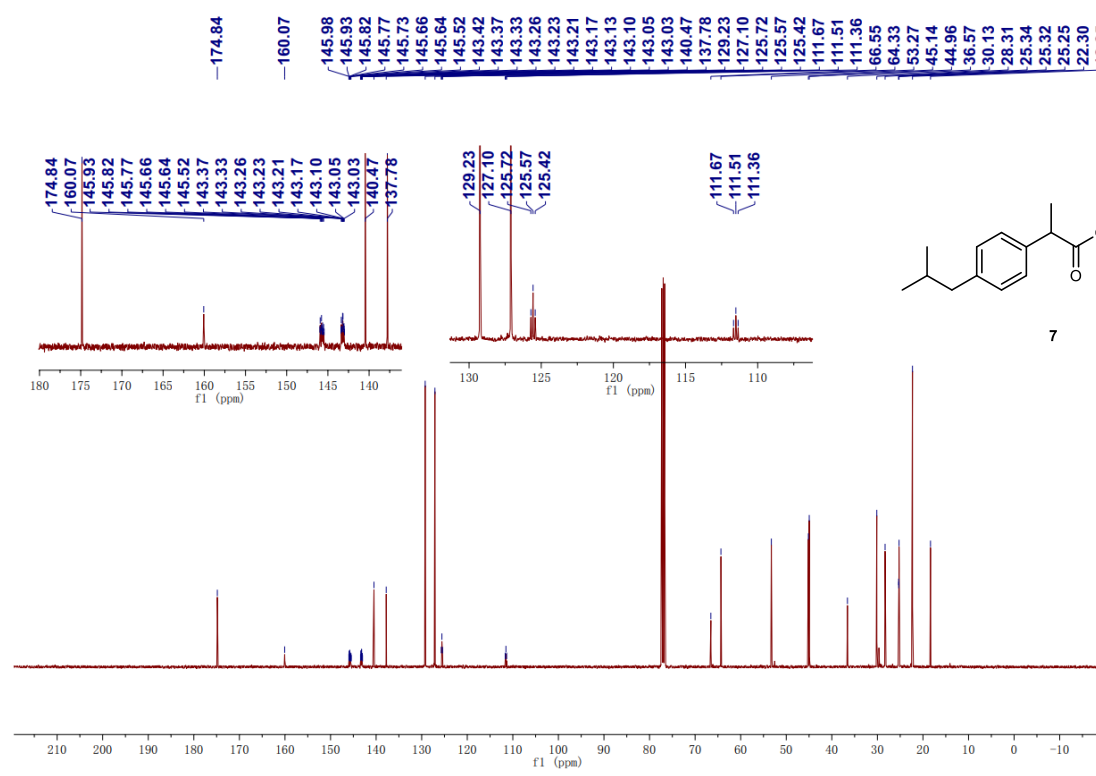

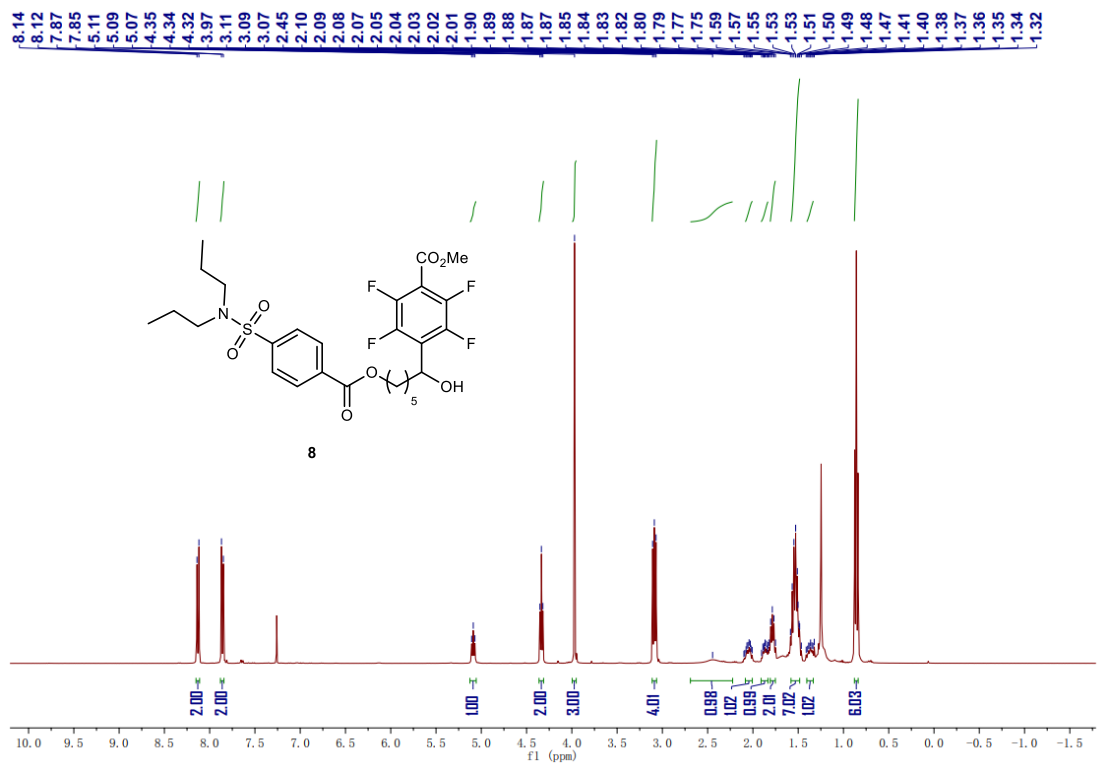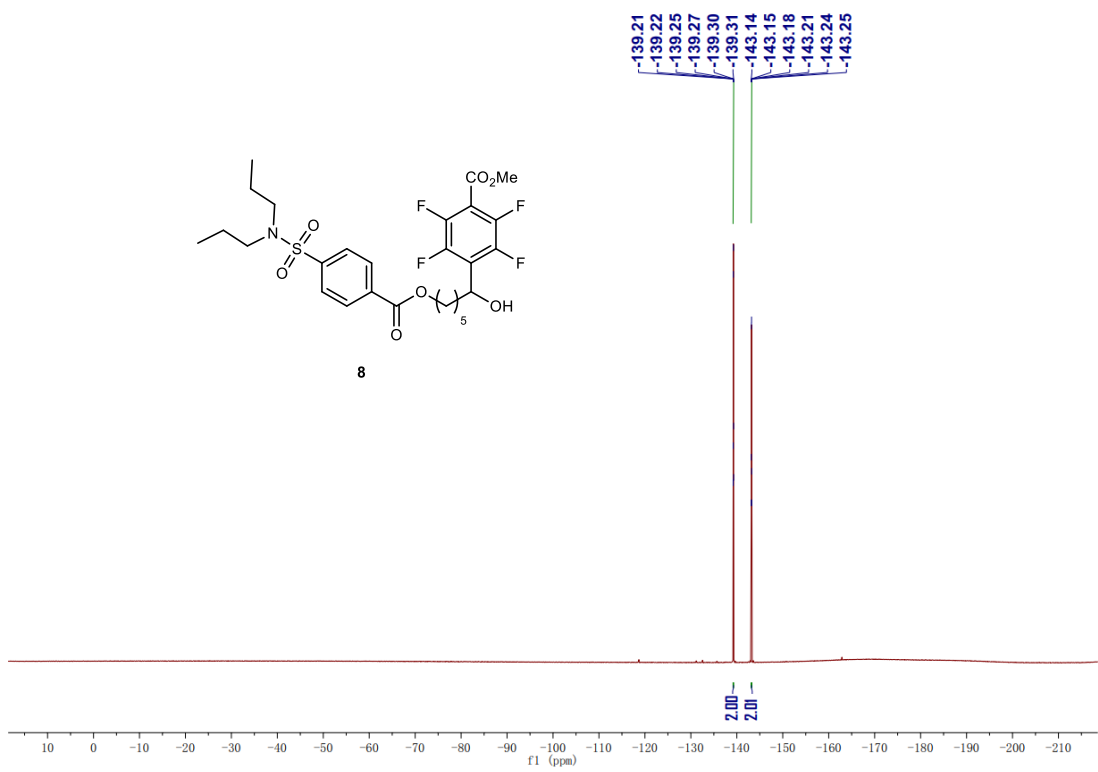





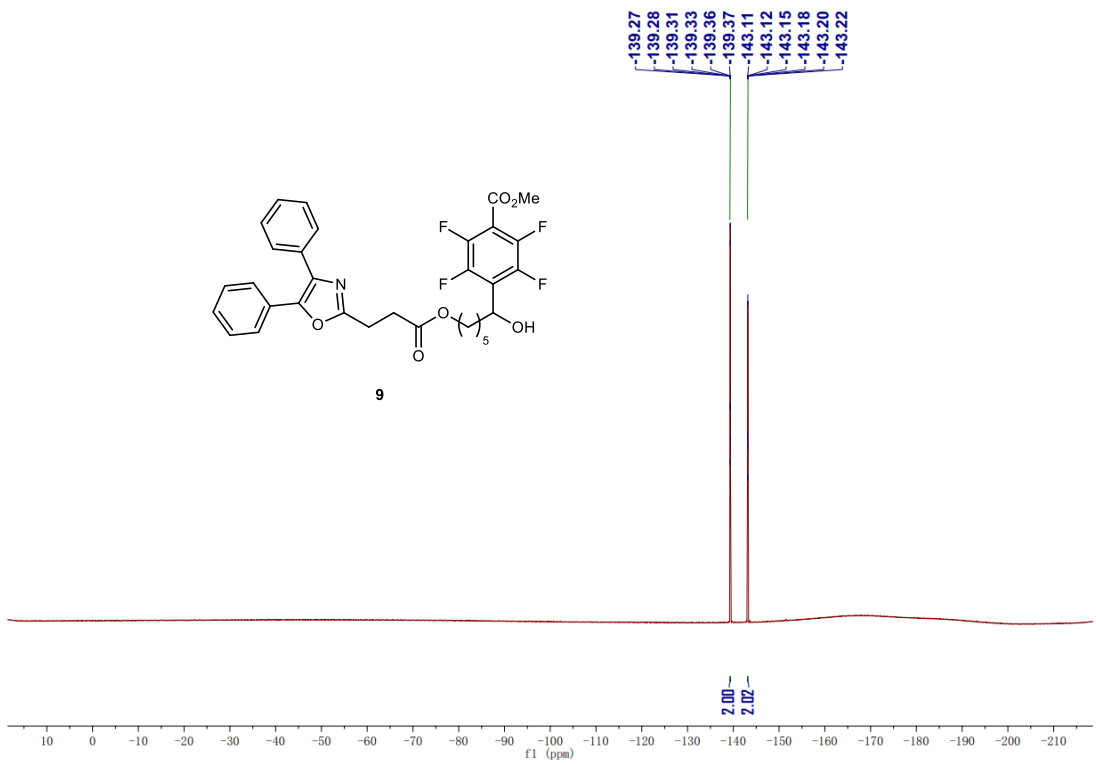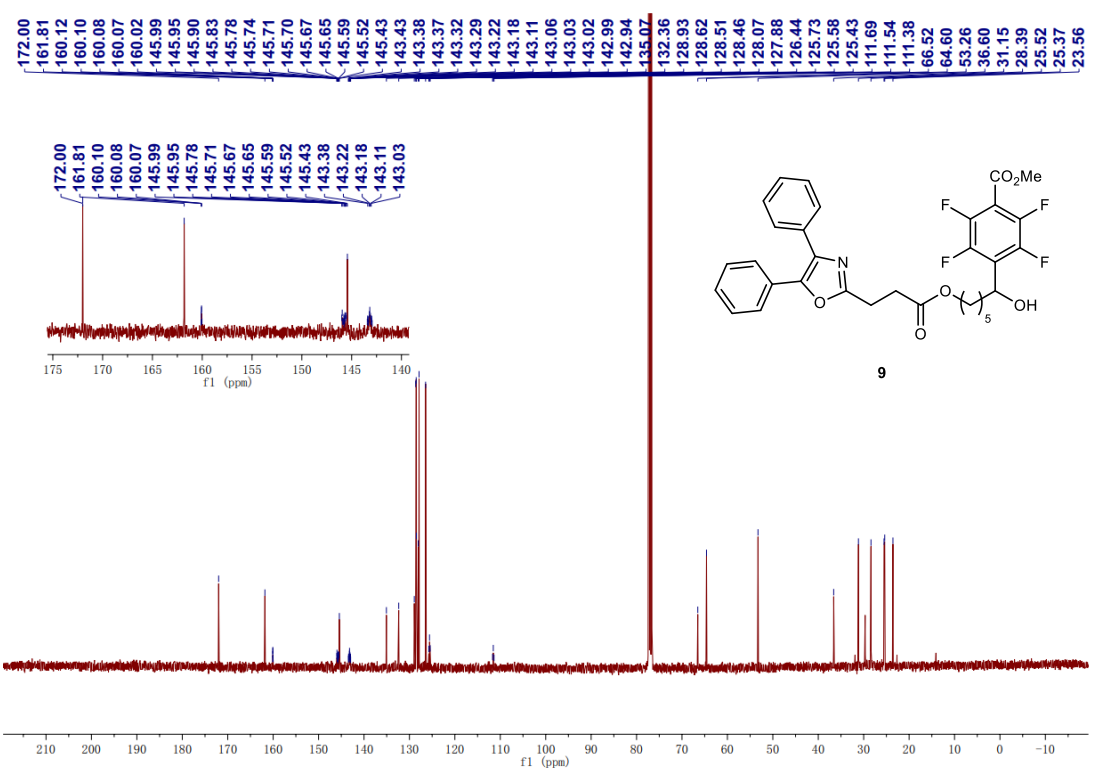

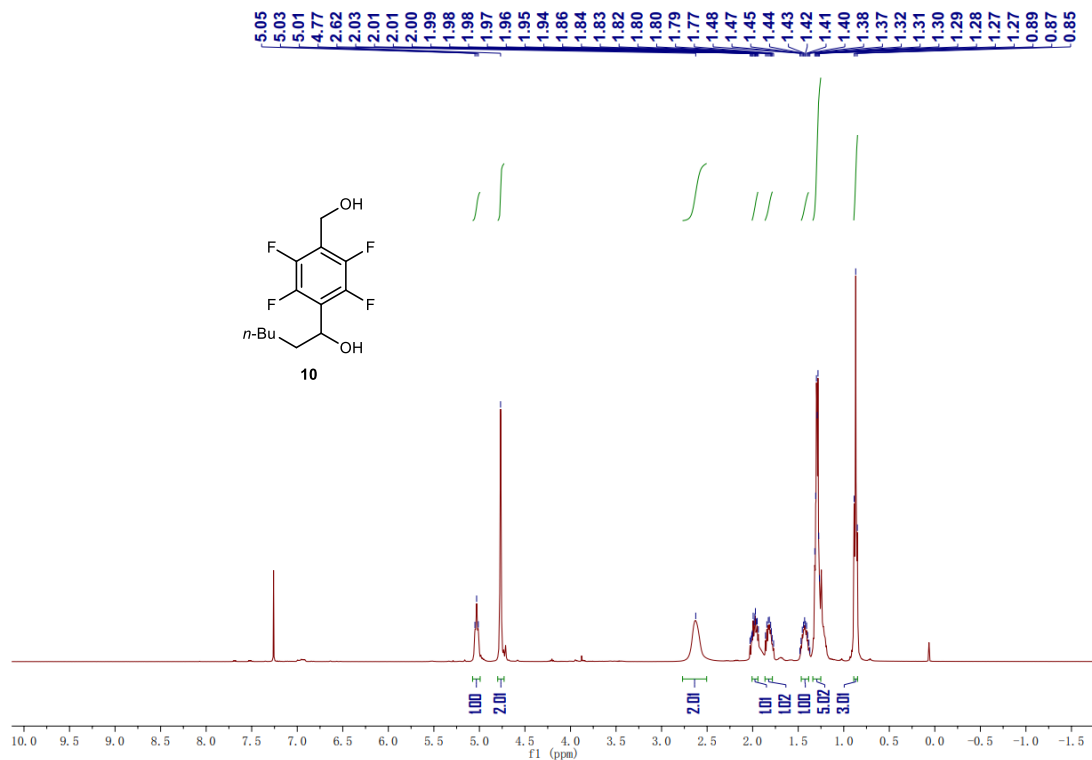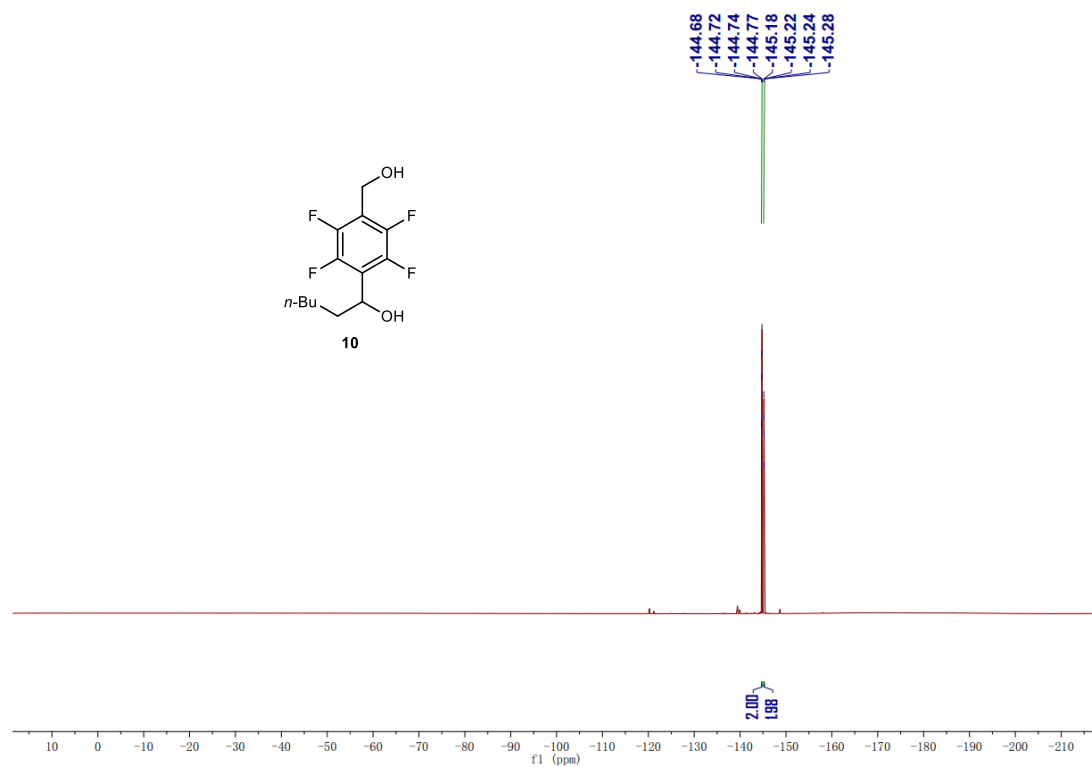

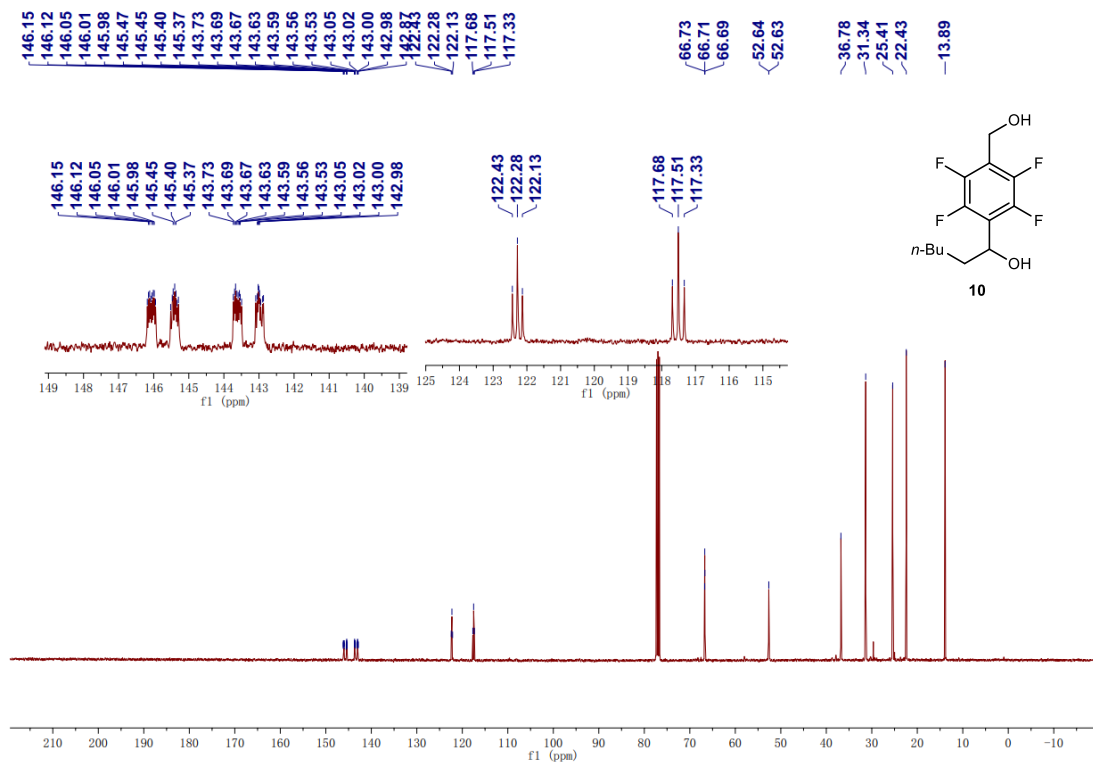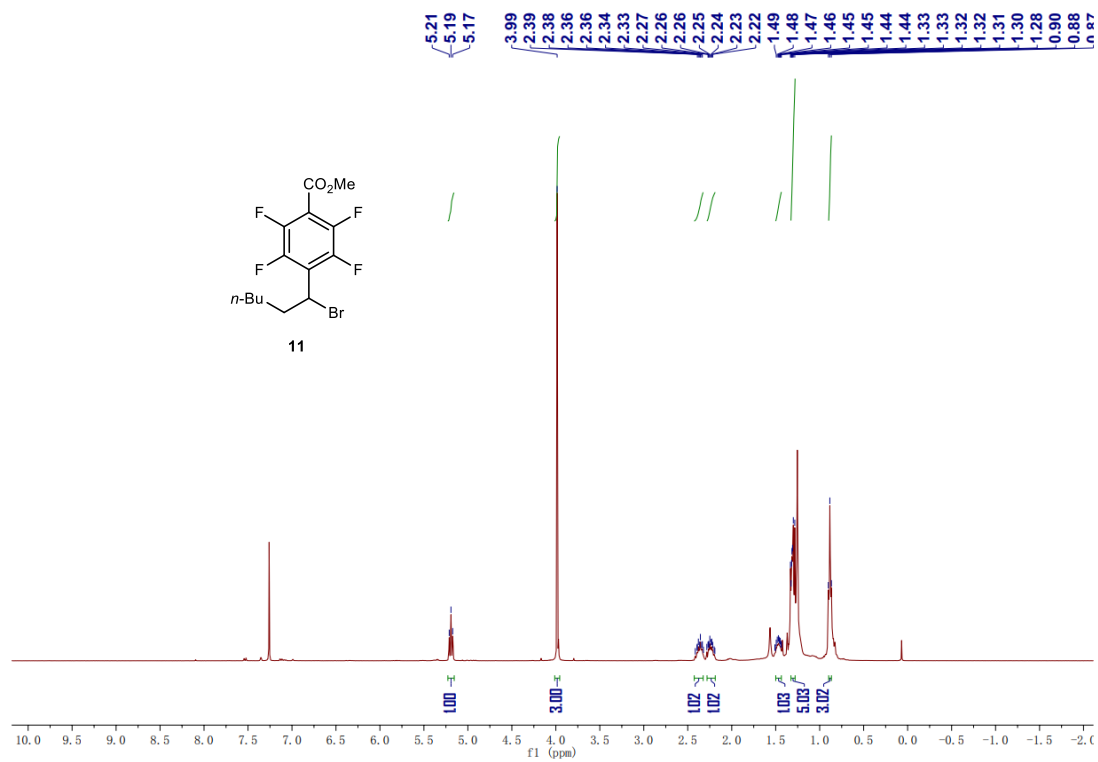

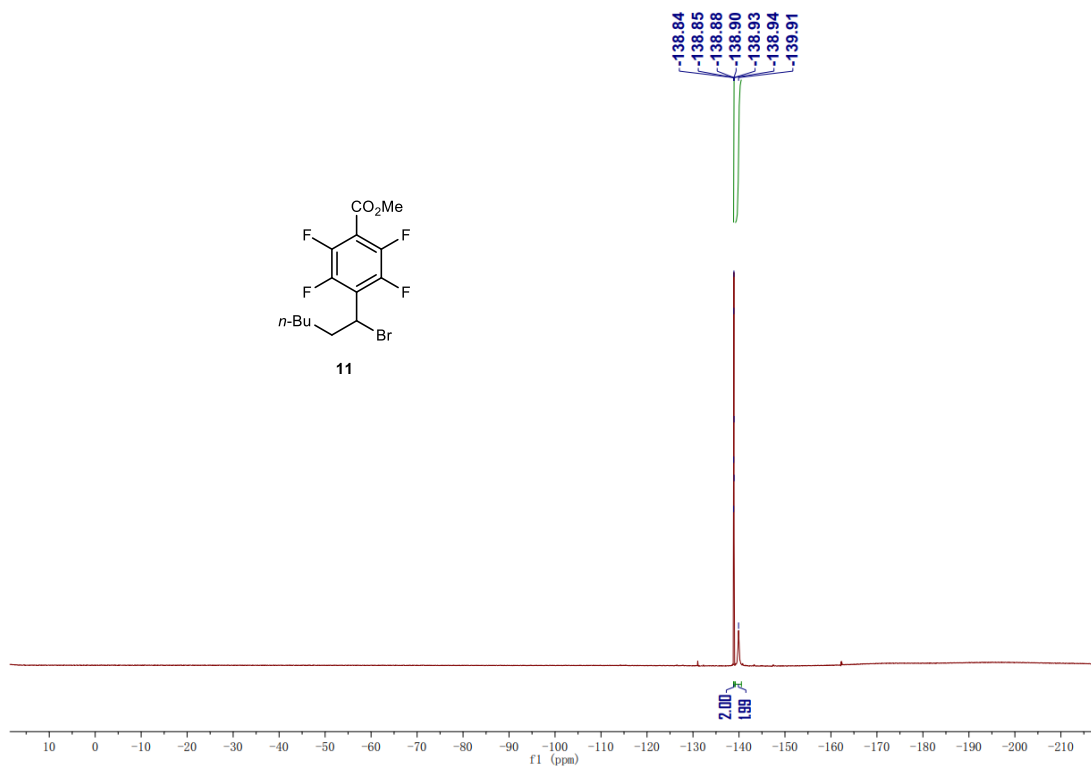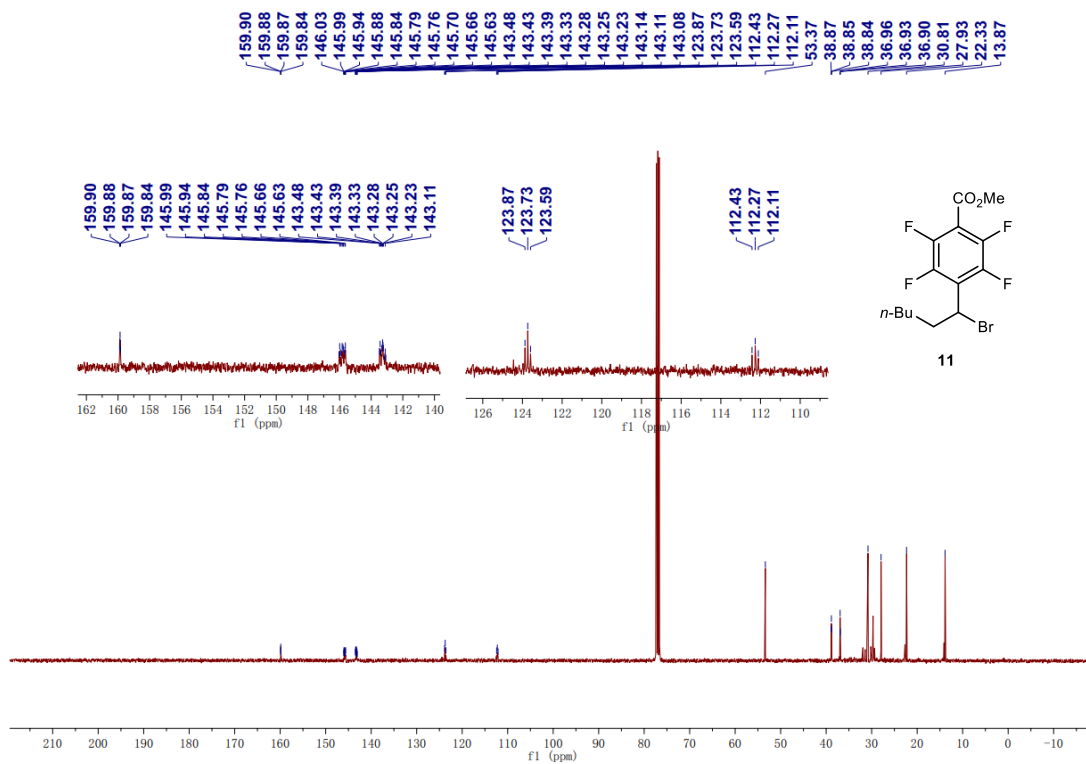

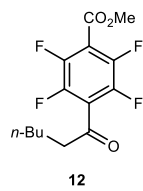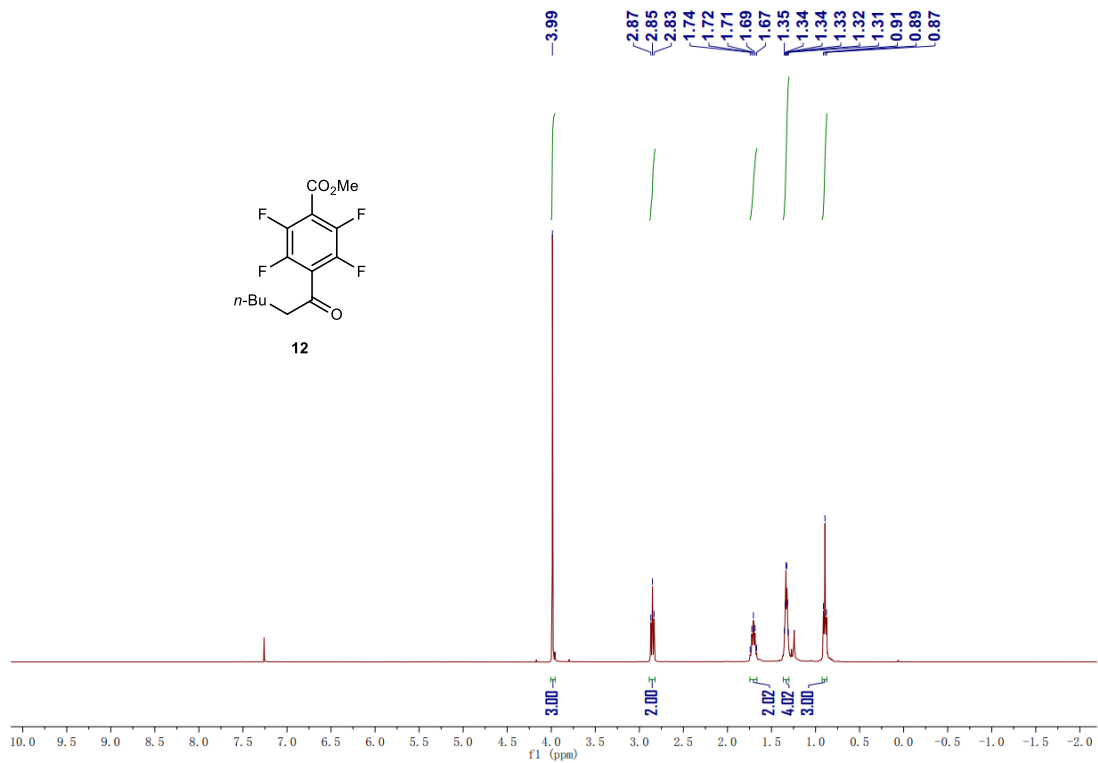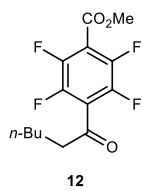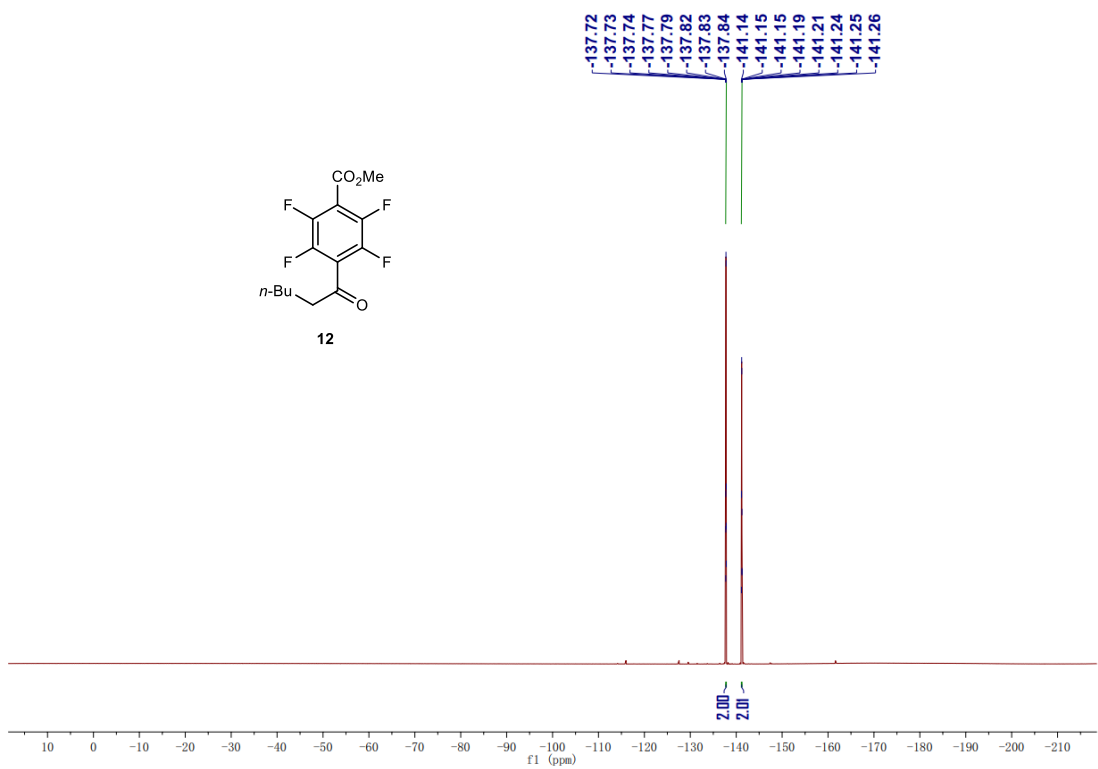

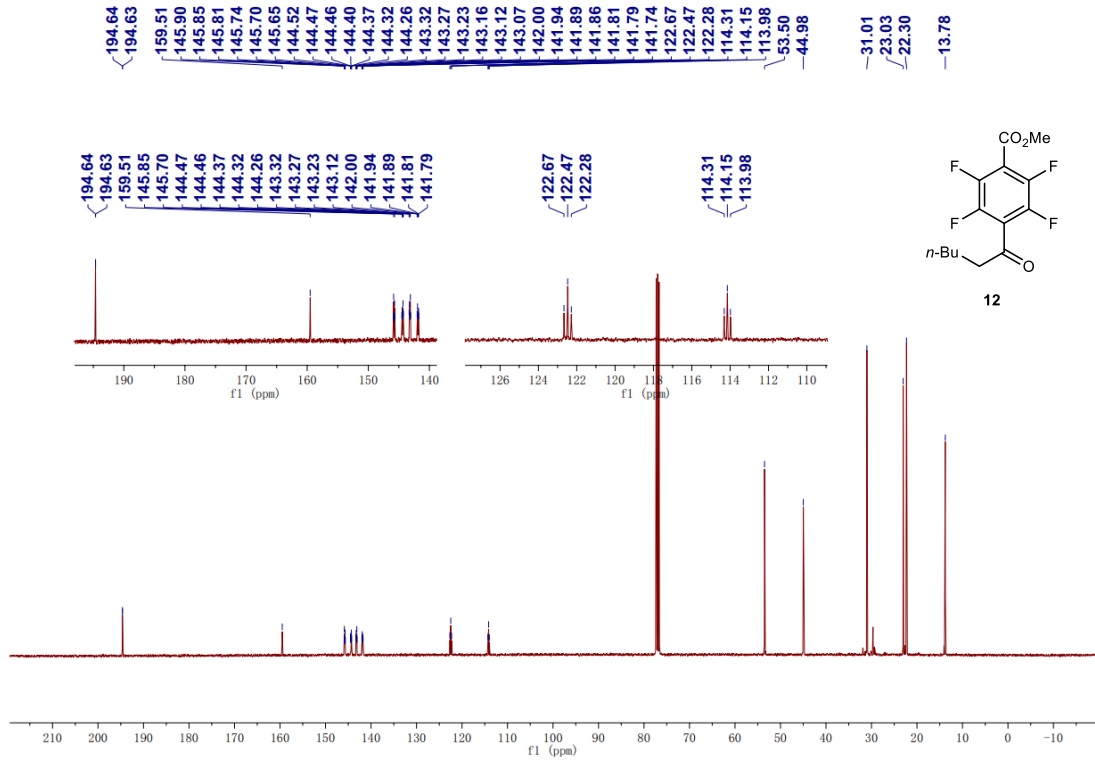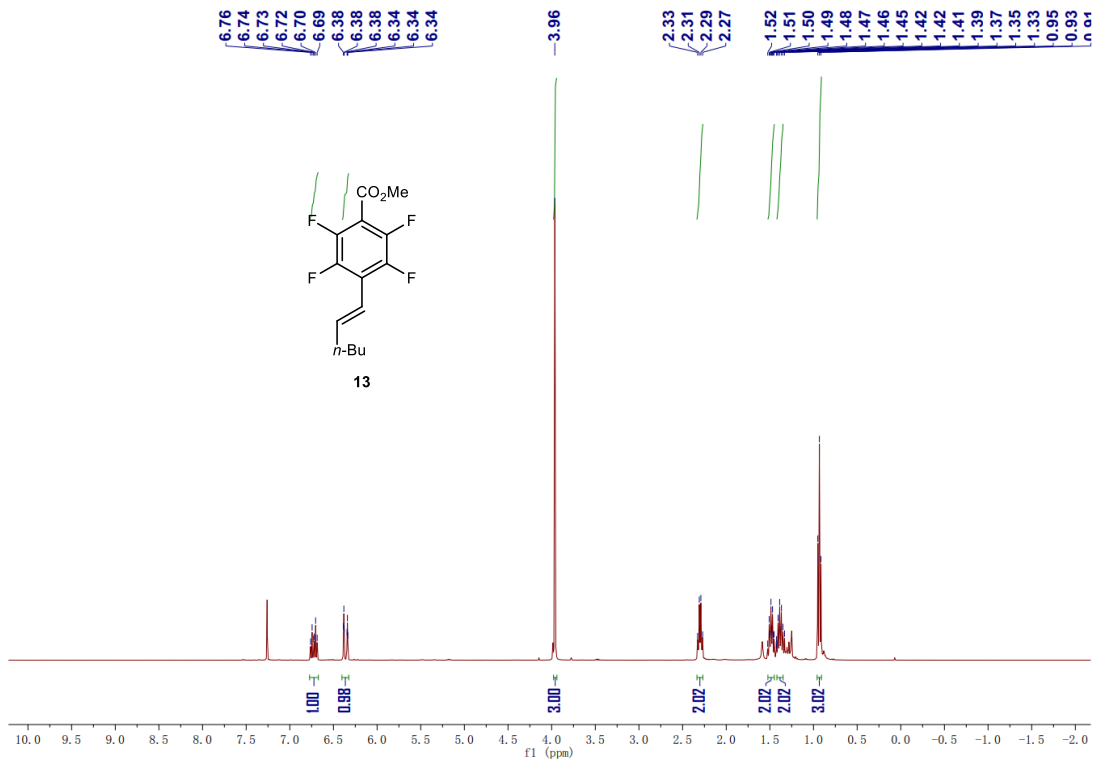

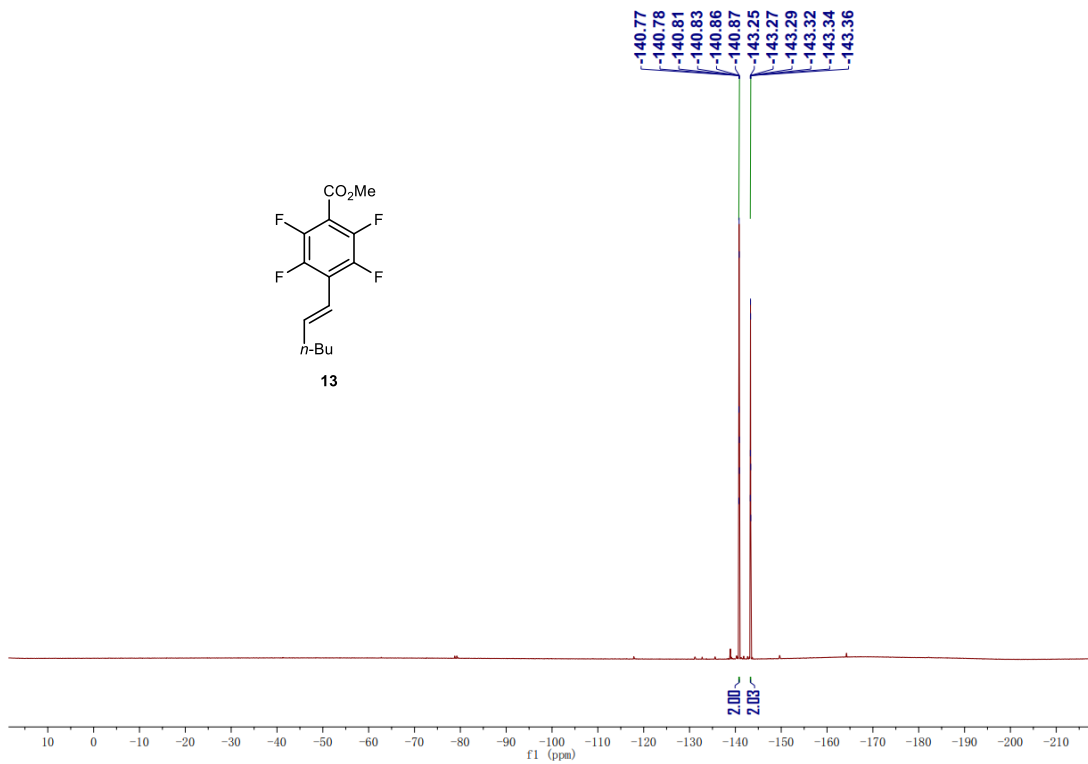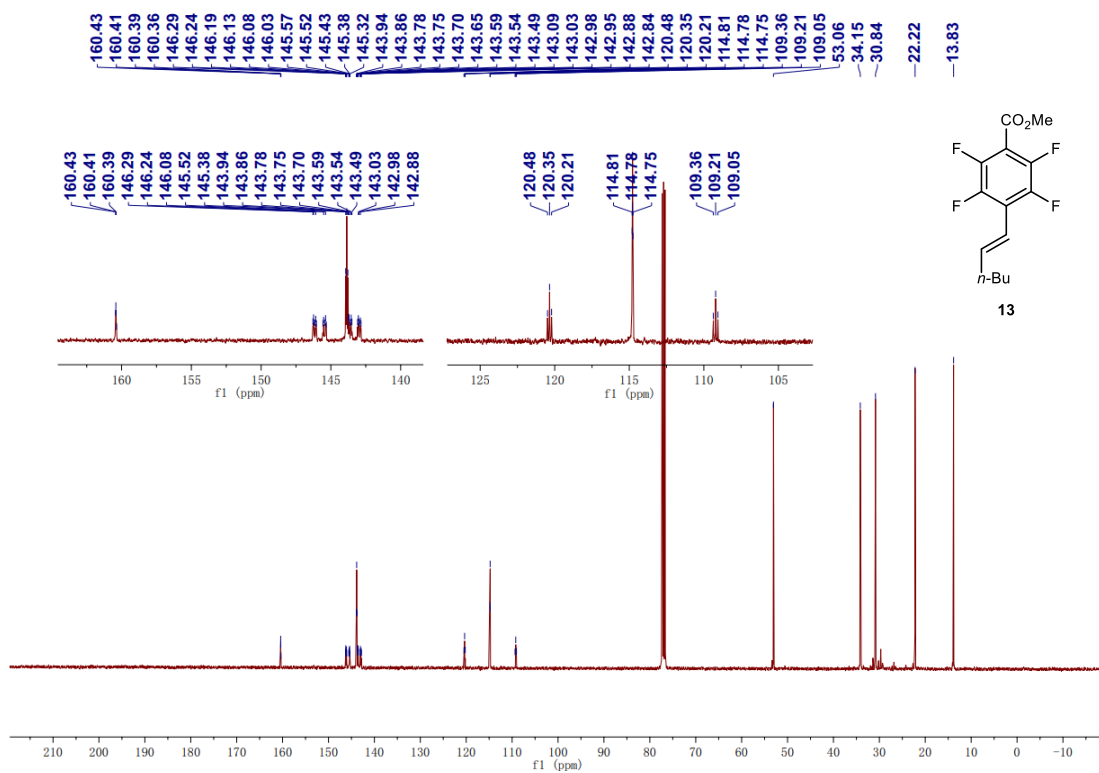



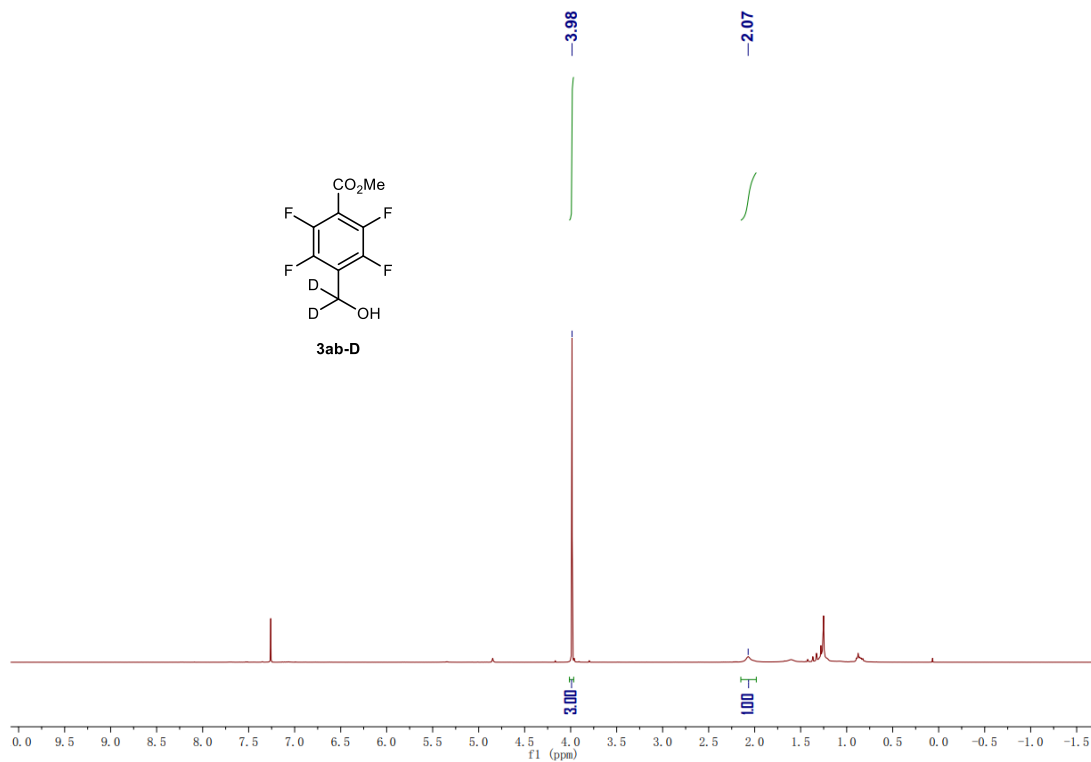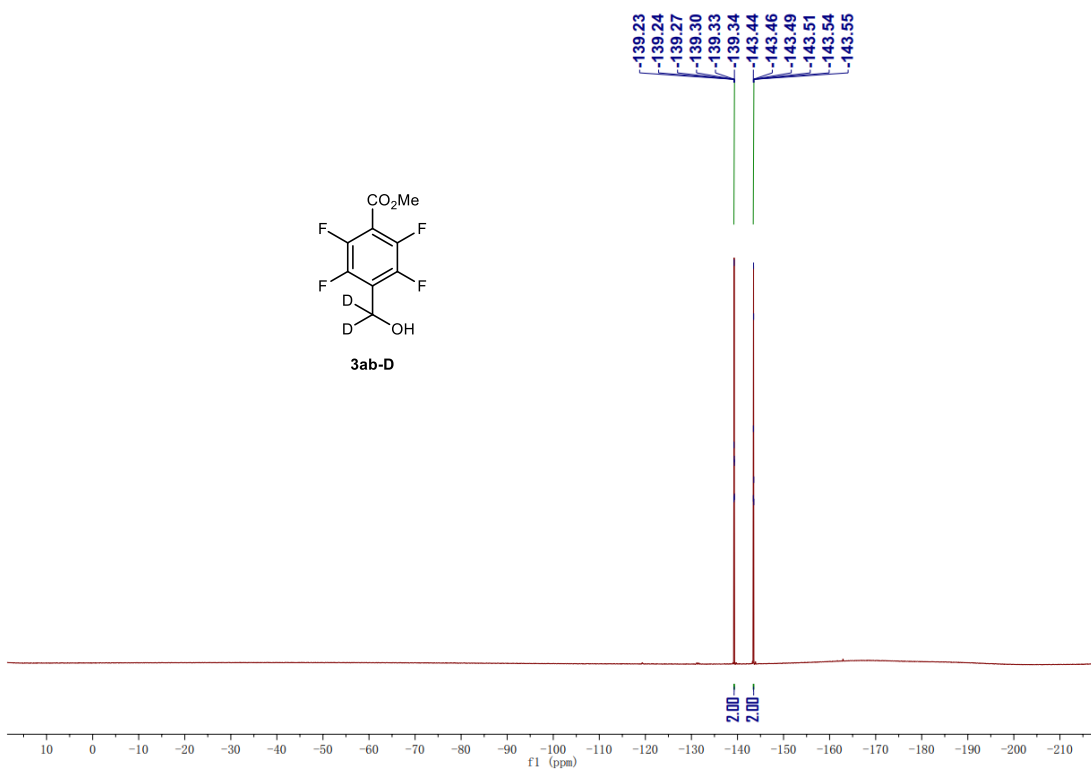

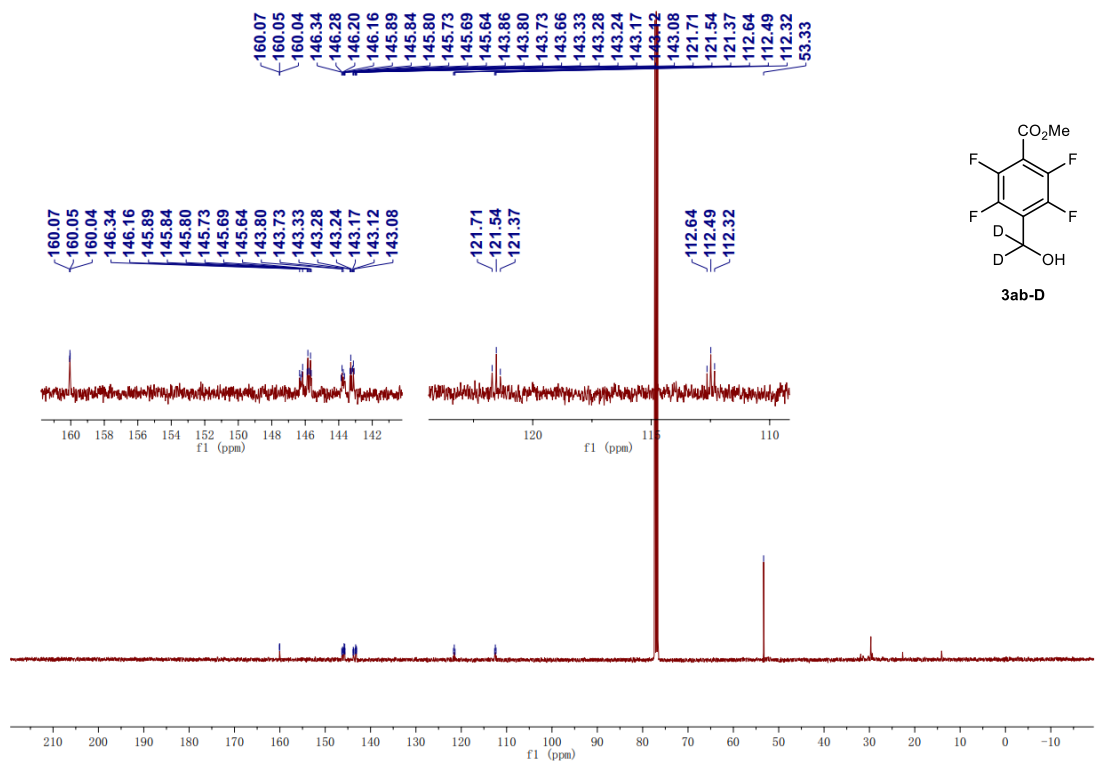

Supplement: SC-014-D2SC06290A-s001.pdf [file SC-014-D2SC06290A-s001.pdf]
